# Supplementary material
Source: publisher site journal article supplement (https://www.spandidos-publications.com/676/downloadSupplementary)
Supplement: Supplementary file 1 [file downloadSupplementary]

## Sheet: Sheet1
Protein identification list
Accession	Description	Coverage	Unique Peptides	Peptides	PSMs	AAs	MW [kDa]	calc. pI	C-1/REF	C-1/REF Count	C-1/REF Variability [%]	C-2/REF	C-2/REF Count	C-2/REF Variability [%]	C-3/REF	C-3/REF Count	C-3/REF Variability [%]	OXA-1/REF	OXA-1/REF Count	OXA-1/REF Variability [%]	OXA-2/REF	OXA-2/REF Count	OXA-2/REF Variability [%]	OXA-3/REF	OXA-3/REF Count	OXA-3/REF Variability [%]	ACBP-1/REF	ACBP-1/REF Count	ACBP-1/REF Variability [%]	ACBP-2/REF	ACBP-2/REF Count	ACBP-2/REF Variability [%]	ACBP-3/REF	ACBP-3/REF Count	ACBP-3/REF Variability [%]	A-O-1/REF	A-O-1/REF Count	A-O-1/REF Variability [%]	A-O-2/REF	A-O-2/REF Count	A-O-2/REF Variability [%]	A-O-3/REF	A-O-3/REF Count	A-O-3/REF Variability [%]
P05387	60S acidic ribosomal protein P2 OS=Homo sapiens GN=RPLP2 PE=1 SV=1 - [RLA2_HUMAN]	92.17	5	8	100	115	11.6578	4.53857	1.0975	11	9.61135	1.08592	18	14.8226	1.02537	17	18.6009	1.02916	11	66.0178	0.90388	18	18.0777	0.932109	18	12.5102	0.950077	11	35.1048	1.0997	18	23.0276	0.821742	18	45.167	0.778778	11	33.5843	0.828868	18	16.9049	1.28292	18	42.6688
F5H136	T-complex protein 1 subunit alpha (Fragment) OS=Homo sapiens GN=TCP1 PE=1 SV=1 - [F5H136_HUMAN]	88.24	1	10	61	136	14.4096	4.88135	1.05781	1		0.922601	1					1.11997	1		1.09128	1					0.871972	1		0.896691	1					1.00486	1		1.1016	1
P04080	Cystatin-B OS=Homo sapiens GN=CSTB PE=1 SV=2 - [CYTB_HUMAN]	84.69	6	6	116	98	11.1326	7.56201	0.939461	27	13.5331	0.99234	44	7.32417	1.03253	45	8.64591	1.12614	27	10.85	0.935141	44	6.6909	1.00736	45	11.281	0.87998	27	6.24658	1.09423	44	7.69207	1.00885	45	19.9396	1.1405	27	12.2496	0.983758	44	6.55978	0.991702	45	23.3759
Q9NYJ1	Cytochrome c oxidase assembly factor 4 homolog, mitochondrial OS=Homo sapiens GN=COA4 PE=1 SV=2 - [COA4_HUMAN]	83.91	7	7	15	87	10.1277	6.03662	1.15865	7	6.48389	0.98545	3	6.12012	0.953046	5	3.43998	0.883156	7	9.69709	1.02684	3	0.480875	0.988254	5	10.5453	0.978577	7	5.17777	0.911746	3	12.4921	1.11727	5	15.6375	1.01655	7	31.3104	1.00839	3	5.33011	0.951675	5	5.57616
G3V1D1	Ferritin OS=Homo sapiens GN=FTH1 PE=1 SV=1 - [G3V1D1_HUMAN]	83.19	7	7	10	113	12.8683	5.30029	0.877134	5	2.97641	0.797807	4	22.712	0.581334	1		0.869379	5	11.1166	0.923107	4	7.18456	0.919528	1		1.1079	5	14.1092	1.15763	4	1.99454	1.07142	1		1.05364	5	10.7558	1.14026	4	8.20034	1.42785	1
E5RHG8	Transcription elongation factor B polypeptide 1 (Fragment) OS=Homo sapiens GN=TCEB1 PE=1 SV=1 - [E5RHG8_HUMAN]	82.02	6	6	35	89	9.95372	5.38916	1.01206	11	5.39101	0.995347	13	5.53734	0.949357	11	10.7832	0.93003	11	7.21562	1.03907	13	7.99469	0.953202	11	5.94516	1.03565	11	5.66396	1.01413	13	6.46421	1.04679	11	12.6918	0.983499	11	9.67831	1.01319	13	5.73911	1.00685	11	12.3676
G3V1A4	Cofilin 1 (Non-muscle), isoform CRA_a OS=Homo sapiens GN=CFL1 PE=1 SV=1 - [G3V1A4_HUMAN]	79.87	14	18	225	149	16.8008	8.35303	1.01879	48	9.95101	1.00133	59	8.72367	0.964188	74	11.4619	1.03101	48	14.7671	0.982779	59	8.30024	1.01167	74	12.3442	0.972345	48	8.3609	1.05257	59	11.1548	0.960954	74	15.7267	0.965428	48	16.5397	0.956719	59	10.3335	1.05425	74	10.6202
H0YDD8	60S acidic ribosomal protein P2 (Fragment) OS=Homo sapiens GN=RPLP2 PE=1 SV=1 - [H0YDD8_HUMAN]	78.26	1	4	55	92	9.09046	4.4624	0.879987	1								1.44294	1								0.8403	1								1.0131	1
P61604	10 kDa heat shock protein, mitochondrial OS=Homo sapiens GN=HSPE1 PE=1 SV=2 - [CH10_HUMAN]	77.45	5	9	84	102	10.9249	8.92432	0.958267	17	5.46569	0.9737	13	6.19288	1.06893	14	10.5107	1.00204	17	8.99088	1.02451	13	12.9039	0.998666	14	10.6198	0.962083	17	7.35808	1.01965	13	12.8666	1.09987	14	11.645	1.0413	17	7.02389	1.00263	13	2.43796	0.880807	14	8.65398
Q06830	Peroxiredoxin-1 OS=Homo sapiens GN=PRDX1 PE=1 SV=1 - [PRDX1_HUMAN]	76.38	11	14	228	199	22.0963	8.1333	0.95497	59	6.38603	0.968855	47	9.22857	0.956837	58	15.5036	1.09323	59	11.5795	1.01223	47	7.6331	0.981731	58	10.363	0.947084	59	5.72574	1.05719	47	7.54913	1.07808	58	16.8896	1.0734	59	8.48919	1.01154	47	7.56854	0.976175	58	10.2402
P51149	Ras-related protein Rab-7a OS=Homo sapiens GN=RAB7A PE=1 SV=1 - [RAB7A_HUMAN]	76.33	14	14	87	207	23.4748	6.69775	0.981817	23	6.12355	1.00874	28	8.02408	0.996559	36	12.5401	1.00055	23	8.15204	1.02782	28	4.49779	1.02576	36	8.0989	1.00277	23	8.97056	0.98545	28	6.17961	0.953092	36	11.4932	1.04709	23	5.9078	0.997104	28	6.28295	1.03945	36	9.28456
Q8NI62	Ribosomal protein S2 OS=Homo sapiens GN=OK/KNS-cl.6 PE=2 SV=1 - [Q8NI62_HUMAN]	75.95	1	6	40	79	8.75228	8.00146	1.09713	3	5.48425	1.11853	1		0.942613	2	2.91177	0.82146	3	0.0893427	1.00509	1		1.11758	2	3.14806	1.12748	3	6.52087	0.975243	1		0.954581	2	1.21664	0.787416	3	18.9999	0.894129	1		0.945583	2	3.62623
P37802	Transgelin-2 OS=Homo sapiens GN=TAGLN2 PE=1 SV=3 - [TAGL2_HUMAN]	75.38	13	14	188	199	22.3772	8.25049	0.992263	54	9.58077	1.01341	54	8.62633	1.0076	58	11.2787	1.00712	54	10.3685	1.02894	54	7.47112	1.09939	58	10.4203	1.00632	54	7.61333	0.99336	54	6.62937	0.801776	57	25.7207	0.970112	54	12.261	0.957631	54	8.20975	1.09134	58	12.5369
P04075	Fructose-bisphosphate aldolase A OS=Homo sapiens GN=ALDOA PE=1 SV=2 - [ALDOA_HUMAN]	75	19	27	488	364	39.3953	8.08936	0.970018	148	8.99345	0.992974	156	8.37653	1.01628	132	13.1303	1.05091	148	9.34333	1.00023	156	8.08047	0.971211	132	10.9261	0.976016	148	8.30226	1.00446	156	8.71937	1.04515	132	11.22	1.04812	148	7.52121	1.0112	156	7.38509	0.976283	132	12.3962
E5RIW3	Tubulin-specific chaperone A OS=Homo sapiens GN=TBCA PE=1 SV=1 - [E5RIW3_HUMAN]	75	9	9	28	84	10.074	4.62744	0.946423	12	13.1218	0.924968	9	8.45875	0.966108	7	11.8079	1.03136	12	8.87835	1.02438	9	7.88237	0.946597	7	10.438	1.0198	12	11.4844	1.01038	9	6.10119	1.15106	7	12.0235	1.01131	12	17.0072	1.06797	9	5.99045	0.958121	7	5.90218
P08727	Keratin, type I cytoskeletal 19 OS=Homo sapiens GN=KRT19 PE=1 SV=4 - [K1C19_HUMAN]	74.75	20	33	580	400	44.0791	5.13525	1.03264	131	6.86534	1.01085	118	7.00696	1.02293	119	11.7501	0.928032	131	15.4837	0.99792	118	11.6774	0.968929	119	12.3972	1.02147	131	9.14289	0.989143	118	9.68843	1.07624	119	9.56368	0.995153	131	12.3932	0.995329	118	7.44054	0.937737	119	12.4319
A0A075B6W3	Protein TRAJ33 (Fragment) OS=Homo sapiens GN=TRAJ33 PE=4 SV=1 - [A0A075B6W3_HUMAN]	73.68	1	1	4	19	2.1261	8.73389	1.12123	1					0.897758	1		1.04859	1					1.23567	1		0.939748	1					0.886169	1		0.882257	1					0.903595	1
Q99714	3-hydroxyacyl-CoA dehydrogenase type-2 OS=Homo sapiens GN=HSD17B10 PE=1 SV=3 - [HCD2_HUMAN]	73.56	13	13	93	261	26.9061	7.78174	0.999866	33	6.73769	1.04309	32	12.8906	0.949569	28	8.06727	1.04146	33	19.1907	0.963599	32	13.1253	1.05324	28	4.00222	0.992459	33	7.67197	1.02126	32	9.65285	0.921465	28	36.4483	0.968253	33	8.35774	0.95229	32	10.6378	1.04041	28	25.8468
H3BPC4	SUMO-conjugating enzyme UBC9 (Fragment) OS=Homo sapiens GN=UBE2I PE=1 SV=2 - [H3BPC4_HUMAN]	72.86	6	6	28	70	7.99403	9.71533	1.03003	8	7.71028	1.03303	9	6.67855	0.956162	11	4.65547	1.0152	8	3.75156	0.925673	9	7.5031	1.08704	11	5.59021	1.01204	8	5.90011	1.0949	9	7.60795	0.844092	11	10.9914	0.951485	8	2.86927	0.919554	9	3.96578	1.00943	11	7.01588
P62888	60S ribosomal protein L30 OS=Homo sapiens GN=RPL30 PE=1 SV=2 - [RL30_HUMAN]	72.17	9	9	69	115	12.7757	9.62744	1.06898	24	6.89222	1.05714	19	9.43446	1.01534	26	8.2471	0.849101	24	12.2517	0.872733	19	11.6455	0.978019	26	10.8261	1.10878	24	12.3013	1.13325	19	8.52566	1.02787	26	18.3115	0.887994	24	21.1642	0.911606	19	9.91662	0.933532	26	9.03957
P68036	Ubiquitin-conjugating enzyme E2 L3 OS=Homo sapiens GN=UBE2L3 PE=1 SV=1 - [UB2L3_HUMAN]	72.08	7	8	45	154	17.8502	8.51416	1.01089	16	8.25067	0.946478	15	14.6241	0.895964	13	13.5751	0.98553	16	15.9091	0.978287	15	6.91451	1.14759	13	12.9287	1.02509	16	11.0086	1.06331	15	7.10391	0.701733	13	31.4244	0.962878	16	10.0825	0.950269	15	10.7935	1.16816	13	12.0253
P00558	Phosphoglycerate kinase 1 OS=Homo sapiens GN=PGK1 PE=1 SV=3 - [PGK1_HUMAN]	71.94	23	28	523	417	44.5861	8.104	0.892613	129	16.6782	1.07162	130	10.0313	1.07184	142	14.8573	1.1388	129	15.728	0.936725	129	11.7527	0.999115	143	13.4667	0.969965	129	13.1	1.05198	130	12.5235	0.898671	143	27.5763	1.01245	129	13.8813	0.943123	129	11.4436	1.01344	143	17.1515
Q6FG99	RPLP1 protein OS=Homo sapiens GN=RPLP1 PE=2 SV=1 - [Q6FG99_HUMAN]	71.93	1	4	84	114	11.5608	4.37354	0.900446	2	8.198	1.21061	2	2.71086	1.01636	1		1.47426	2	19.4331	0.780677	2	0.193759	0.864505	1		0.868367	2	2.53345	1.2301	2	8.65537	0.834734	1		0.893318	2	20.6789	0.754661	2	8.73929	1.34927	1
P05386	60S acidic ribosomal protein P1 OS=Homo sapiens GN=RPLP1 PE=1 SV=1 - [RLA1_HUMAN]	71.93	1	4	82	114	11.5067	4.32275				1.40484	2	47.687	0.843438	1					0.846446	1		1.16733	1					1.60089	2	33.2042	0.26984	1					0.831441	1		1.71793	1
H0YEQ8	Polyadenylate-binding protein 4 (Fragment) OS=Homo sapiens GN=PABPC4 PE=1 SV=1 - [H0YEQ8_HUMAN]	71.43	1	7	28	112	12.5793	7.95752							1.02661	1								0.990088	1								1.1825	1								0.791413	1
H0YIB2	Keratin, type II cytoskeletal 8 (Fragment) OS=Homo sapiens GN=KRT8 PE=1 SV=2 - [H0YIB2_HUMAN]	71.43	1	3	115	35	4.07405	5.10986				0.978823	2	17.7134	1.19187	1					0.985347	2	2.30479	0.867405	1					0.958066	2	7.23656	1.24099	1					1.06988	2	9.22736	0.737618	1
P62258	14-3-3 protein epsilon OS=Homo sapiens GN=YWHAE PE=1 SV=1 - [1433E_HUMAN]	71.37	16	19	441	255	29.1554	4.7417	1.01784	99	10.2593	0.98212	116	10.2275	0.954006	103	14.9181	0.928367	99	13.6307	1.02503	116	9.90453	1.05352	103	11.7859	1.01843	99	8.36335	1.01311	116	8.3016	1.00105	103	10.4841	1.00653	99	12.5832	1.00189	116	10.4983	0.966551	103	11.1554
P23396	40S ribosomal protein S3 OS=Homo sapiens GN=RPS3 PE=1 SV=2 - [RS3_HUMAN]	71.19	18	18	166	243	26.6714	9.65674	1.1211	59	8.73476	1.0431	53	7.25171	1.01455	54	11.6667	0.826987	59	11.6512	0.928456	53	6.88438	1.01523	54	9.24775	1.06906	59	7.12627	1.08133	53	6.24702	1.09553	54	13.0138	0.883252	59	13.6706	0.962749	53	6.98892	0.877387	54	14.6094
O00299	Chloride intracellular channel protein 1 OS=Homo sapiens GN=CLIC1 PE=1 SV=4 - [CLIC1_HUMAN]	70.95	15	15	104	241	26.9057	5.17334	0.933696	29	9.57004	0.968846	37	12.2966	1.0344	38	7.79052	1.08179	29	10.862	1.02925	37	6.36831	0.944642	38	10.8056	0.93852	29	11.588	1.0208	37	10.12	1.0004	38	18.914	1.07466	29	9.98388	1.00191	37	5.40337	0.997172	38	10.5082
Q9BTQ7	Similar to ribosomal protein L23 (Fragment) OS=Homo sapiens PE=2 SV=1 - [Q9BTQ7_HUMAN]	70.9	8	8	66	134	14.1407	10.2573	1.08506	24	6.38592	1.07232	23	8.63095	1.06503	18	9.07332	0.872171	24	10.625	0.898285	23	6.10382	1.03842	18	7.81755	1.08581	24	9.6701	1.10542	23	7.85262	0.988267	18	18.4983	0.864629	24	16.0811	0.892656	23	5.09818	0.945966	18	9.11752
C9J0K6	Sorcin OS=Homo sapiens GN=SRI PE=1 SV=1 - [C9J0K6_HUMAN]	70.32	10	10	29	155	17.5935	5.60498	0.994052	9	6.37415	0.962673	10	2.64047	0.910188	10	4.85202	1.0255	9	8.45843	1.00744	10	6.75638	1.04838	10	4.00955	0.946571	9	6.01906	1.01091	10	3.48963	0.997388	10	10.9029	1.02761	9	4.13193	1.02962	10	5.84362	0.997431	10	6.71093
Q75MT9	Malate dehydrogenase (Fragment) OS=Homo sapiens GN=MDH2 PE=3 SV=1 - [Q75MT9_HUMAN]	70.25	18	18	261	316	33.2075	8.25049	1.00245	93	9.15382	1.00195	85	8.5512	0.934784	83	12.6511	0.984763	93	13.0519	1.00648	85	10.6601	1.07869	83	9.84588	1.02884	93	8.81086	1.014	85	7.57721	0.873319	83	19.7506	0.959839	93	9.55602	0.976844	85	7.89556	1.05088	83	11.4897
H0YNW5	Deoxyuridine 5'-triphosphate nucleotidohydrolase, mitochondrial OS=Homo sapiens GN=DUT PE=1 SV=1 - [H0YNW5_HUMAN]	70.06	3	9	53	167	17.816	7.28369	1.03421	5	5.65018	0.931942	5	5.02896	1.16392	6	10.9807	0.96892	5	7.34511	1.02107	5	0.747751	0.81092	6	7.23701	1.0848	5	3.64305	1.02942	5	5.40832	1.21305	6	6.51638	0.919878	5	7.55207	1.04646	5	6.58365	0.903867	6	8.2684
P07737	Profilin-1 OS=Homo sapiens GN=PFN1 PE=1 SV=2 - [PROF1_HUMAN]	70	10	10	189	140	15.0446	8.26514	1.01068	65	9.45506	1.01538	55	11.3593	0.969608	69	12.4865	1.00306	65	8.81123	1.0291	55	8.24514	1.07982	69	8.43752	0.988536	65	6.79782	0.974852	55	7.61654	0.872664	69	25.9361	0.997157	65	9.14541	0.972188	55	6.84793	1.06429	69	10.5753
Q5ZEY3	Glyceraldehyde-3-phosphate dehydrogenase (Fragment) OS=Homo sapiens GN=GAPD PE=2 SV=1 - [Q5ZEY3_HUMAN]	69.77	1	6	140	86	9.19504	9.71533	0.84191	1		0.90666	2	2.9948	1.02044	1		1.14838	1		1.11666	2	0.0070969	0.945497	1		0.951125	1		0.852551	2	5.39762	1.08338	1		1.17963	1		1.13594	2	6.50375	0.965373	1
Q9GZT3	SRA stem-loop-interacting RNA-binding protein, mitochondrial OS=Homo sapiens GN=SLIRP PE=1 SV=1 - [SLIRP_HUMAN]	69.72	8	8	34	109	12.3414	10.2427	1.04517	13	5.82523	0.984385	12	9.27673	1.03634	9	4.2588	0.978141	13	14.4418	1.00423	12	9.9693	1.04391	9	3.85039	1.00559	13	8.45094	1.03761	12	3.83222	0.938624	9	10.2852	0.958266	13	13.1686	1.0015	12	8.37956	0.961891	9	9.46206
P61970	Nuclear transport factor 2 OS=Homo sapiens GN=NUTF2 PE=1 SV=1 - [NTF2_HUMAN]	69.29	5	5	19	127	14.469	5.37646	0.976947	7	4.92988	0.96513	7	6.9776	0.911319	5	4.57336	1.06659	7	11.1898	1.0584	7	4.36899	1.07589	5	2.32497	1.00278	7	2.79428	1.09207	7	3.31134	1.02124	5	7.1974	1.03958	7	10.6852	0.984563	7	10.0244	1.00771	5	10.4893
A0A059S4M9	ATP synthase protein 8 OS=Homo sapiens GN=ATP8 PE=3 SV=1 - [A0A059S4M9_HUMAN]	69.12	1	3	13	68	7.91595	9.90576	1.59654	1								0.871407	1								0.799976	1								0.553069	1
V9HWK1	Triosephosphate isomerase OS=Homo sapiens GN=HEL-S-49 PE=2 SV=1 - [V9HWK1_HUMAN]	69.08	17	17	319	249	26.6527	6.90283	0.932809	108	10.5859	1.00144	106	8.90253	1.01352	104	12.0755	1.10533	108	8.67728	1.01392	106	10.6223	1.04269	104	8.17752	0.964449	108	6.70681	1.00403	106	6.61823	0.819245	104	32.525	1.02455	108	8.27999	0.98287	106	6.65312	1.06759	104	15.1358
P14618	Pyruvate kinase PKM OS=Homo sapiens GN=PKM PE=1 SV=4 - [KPYM_HUMAN]	68.74	3	34	675	531	57.9	7.84033	0.959484	28	8.85788	1.01613	33	9.1293	1.10017	41	12.0788	1.1146	28	9.50871	0.959757	33	7.58485	0.963052	41	8.66476	0.937645	28	4.60041	1.09495	33	5.75331	1.07789	41	13.5788	1.07315	28	6.57961	0.939053	33	8.74573	0.917512	41	12.8433
H0Y3Z3	Protein disulfide-isomerase (Fragment) OS=Homo sapiens GN=P4HB PE=1 SV=1 - [H0Y3Z3_HUMAN]	68.61	1	20	206	274	31.5234	4.62744							1.02408	1								0.90335	1								1.19488	1								0.897555	1
K7ELP2	Protein lin-37 homolog (Fragment) OS=Homo sapiens GN=LIN37 PE=1 SV=2 - [K7ELP2_HUMAN]	68.42	1	1	1	19	2.13013	8.22119				1.06715	1								0.995994	1								0.986528	1								0.947404	1
Q16768	Glyceraldehyde 3-phosphate dehydrogenase (Fragment) OS=Homo sapiens GN=GAPD PE=2 SV=1 - [Q16768_HUMAN]	68.18	1	3	60	44	4.8913	5.08447				1.15815	1		1.03101	1					0.938298	1		0.946537	1					0.936476	1		0.826414	1					0.951294	1		1.23363	1
O75947	ATP synthase subunit d, mitochondrial OS=Homo sapiens GN=ATP5H PE=1 SV=3 - [ATP5H_HUMAN]	67.7	10	10	50	161	18.4795	5.30029	0.961501	15	3.02633	1.04572	16	10.0466	1.01966	19	9.25407	1.07708	15	4.104	1.01992	16	11.387	0.995604	19	15.3888	0.974483	15	6.00705	1.01085	16	7.81157	0.92354	19	21.7135	1.01298	15	7.13209	0.937982	16	15.6277	1.06867	19	13.8778
P50238	Cysteine-rich protein 1 OS=Homo sapiens GN=CRIP1 PE=1 SV=3 - [CRIP1_HUMAN]	67.53	4	4	24	77	8.52701	8.74854	1.0287	7	2.64543	0.967209	7	8.02993	0.930361	10	9.44461	0.916116	7	8.06142	1.06694	7	3.02709	0.91976	10	9.40528	1.05689	7	5.93625	1.00076	7	6.05717	1.10685	10	11.5718	0.905632	7	2.78238	0.976227	7	5.91348	0.995076	10	11.9023
P05787	Keratin, type II cytoskeletal 8 OS=Homo sapiens GN=KRT8 PE=1 SV=7 - [K2C8_HUMAN]	67.29	29	44	1778	483	53.6711	5.59229	1.03174	429	10.8565	0.987848	454	7.7687	1.02265	463	11.5474	0.907367	429	20.4375	1.01167	454	7.0246	1.03137	464	8.89434	1.05126	429	7.31219	0.998938	454	6.87935	1.04136	464	13.0805	0.988401	429	10.1309	1.00742	454	7.79867	0.928308	463	17.986
P30050	60S ribosomal protein L12 OS=Homo sapiens GN=RPL12 PE=1 SV=1 - [RL12_HUMAN]	67.27	9	9	76	165	17.8075	9.42236	1.05172	30	10.1413	1.09283	22	10.1777	0.958738	24	11.2242	0.881493	30	11.3972	0.856339	22	11.1978	1.05445	24	8.19933	1.09664	30	8.2591	1.11515	22	6.69255	1.00074	24	13.8562	0.882102	30	17.8251	0.909099	22	7.34191	0.94088	24	15.5482
Q32Q12	Nucleoside diphosphate kinase OS=Homo sapiens GN=NME1-NME2 PE=1 SV=1 - [Q32Q12_HUMAN]	67.12	2	14	230	292	32.6209	8.48486	1.00838	3	0.792677	1.02186	4	5.33231	1.00223	5	27.7449	0.979446	3	5.62782	1.09577	4	1.18331	0.945484	5	5.67573	1.03777	3	5.62978	0.941642	4	5.53977	1.03669	5	9.38741	0.939589	3	4.72339	0.971536	4	5.63388	1.07283	5	6.1876
P06733	Alpha-enolase OS=Homo sapiens GN=ENO1 PE=1 SV=2 - [ENOA_HUMAN]	67.05	17	25	681	434	47.1393	7.38623	0.995892	135	7.56179	1.01047	163	8.99435	0.985118	169	11.6781	1.00026	135	11.0382	0.995735	163	7.99937	1.03567	169	7.97908	1.0135	135	8.589	1.0162	163	8.62352	0.950165	169	13.5708	0.977497	135	9.98018	0.971122	163	8.22095	1.02675	169	8.98202
C9J0J7	Profilin OS=Homo sapiens GN=PFN2 PE=1 SV=1 - [C9J0J7_HUMAN]	67.03	2	6	27	91	9.83408	9.17334	0.993493	2	3.68328	0.887079	1		0.898668	3	8.1614	0.958988	2	2.62231	1.08012	1		0.989262	3	1.69399	1.01886	2	8.2714	0.966528	1		1.18802	3	5.16929	1.03365	2	4.17249	1.08301	1		0.949377	3	6.8159
C9J712	Profilin OS=Homo sapiens GN=PFN2 PE=1 SV=1 - [C9J712_HUMAN]	67.03	2	6	37	91	9.79195	9.36377	0.839708	5	4.82651	0.884628	5	5.11224	0.972032	6	15.3511	1.13213	5	7.13286	1.08324	5	2.39532	0.989721	6	7.07931	0.972142	5	5.55135	1.03336	5	4.44839	1.16776	6	12.3994	1.16765	5	4.51682	0.998013	5	4.04797	0.888531	6	12.7519
I3L3Q4	Glyoxalase domain-containing protein 4 (Fragment) OS=Homo sapiens GN=GLOD4 PE=1 SV=1 - [I3L3Q4_HUMAN]	66.96	1	14	73	227	25.4836	7.00537	1.02209	3	6.36062	1.01839	4	1.76751	1.06991	4	12.5662	1.03228	3	1.85627	0.950333	4	9.44664	1.01992	4	24.0512	0.989387	3	0.309197	0.967943	4	6.22533	0.749537	4	23.4891	0.982125	3	11.8131	1.03669	4	2.44415	1.11234	4	6.0465
P62316	Small nuclear ribonucleoprotein Sm D2 OS=Homo sapiens GN=SNRPD2 PE=1 SV=1 - [SMD2_HUMAN]	66.95	9	9	59	118	13.5182	9.90576	0.979229	20	8.99029	1.01643	20	7.93774	0.958965	19	10.1919	1.02163	20	12.8611	0.998294	20	11.2328	1.01472	19	5.02318	0.996927	20	10.1433	1.01279	20	9.26939	1.01454	19	14.9887	1.01892	20	12.1324	1.00595	20	4.43762	0.998155	19	9.4166
P16152	Carbonyl reductase [NADPH] 1 OS=Homo sapiens GN=CBR1 PE=1 SV=3 - [CBR1_HUMAN]	66.79	11	14	64	277	30.3559	8.32373	0.972302	14	9.81226	0.968303	11	10.3495	1.00735	12	11.8361	1.05165	14	7.02919	1.05678	11	13.6721	1.00804	12	5.33534	0.959196	14	10.1811	1.06011	11	14.2139	0.921825	12	34.3127	1.05351	14	7.47543	0.928723	11	11.9651	1.05813	12	17.0405
U3PXP0	Alpha globin chain (Fragment) OS=Homo sapiens GN=HBA2 PE=3 SV=1 - [U3PXP0_HUMAN]	66.67	1	3	33	51	5.69882	7.51807							1.07688	1								0.770402	1								1.33405	1								0.875953	1
P07237	Protein disulfide-isomerase OS=Homo sapiens GN=P4HB PE=1 SV=3 - [PDIA1_HUMAN]	66.54	16	35	382	508	57.0807	4.86865	0.98611	55	7.45338	1.05076	65	7.0635	1.00396	57	11.5056	1.0601	55	10.6556	0.95871	65	9.44233	0.981584	57	12.6015	0.97455	55	9.18713	1.03422	65	7.58618	0.987329	57	17.6621	0.992861	55	13.3362	0.975967	65	10.5647	0.988451	57	10.5553
P61026	Ras-related protein Rab-10 OS=Homo sapiens GN=RAB10 PE=1 SV=1 - [RAB10_HUMAN]	66.5	11	14	80	200	22.5266	8.38232	0.982226	10	4.17306	0.970874	17	4.30394	1.04658	11	14.7337	1.0208	10	7.46569	1.03651	17	7.09356	1.03926	11	5.02871	0.961931	10	6.68728	1.00757	17	7.42545	1.14511	11	29.3582	1.10864	10	7.59711	1.01801	17	11.412	0.976014	11	16.5527
H0YNJ9	Deoxyuridine 5'-triphosphate nucleotidohydrolase, mitochondrial OS=Homo sapiens GN=DUT PE=1 SV=1 - [H0YNJ9_HUMAN]	66.43	1	7	39	143	15.5379	7.89893	1.08947	1					0.921145	1		0.945998	1					1.03709	1		1.03957	1					1.10158	1		0.880517	1					0.915471	1
O60361	Putative nucleoside diphosphate kinase OS=Homo sapiens GN=NME2P1 PE=5 SV=1 - [NDK8_HUMAN]	66.42	1	8	148	137	15.519	8.57275	1.01712	2	7.68055	0.917	2	2.73436	0.937575	3	2.45081	1.10474	2	10.0121	1.0654	2	1.97137	1.05631	3	2.54806	0.908827	2	4.1672	0.919697	2	2.94689	0.927664	3	9.09211	1.01981	2	6.47436	1.10915	2	1.86114	1.04901	3	5.19907
P14854	Cytochrome c oxidase subunit 6B1 OS=Homo sapiens GN=COX6B1 PE=1 SV=2 - [CX6B1_HUMAN]	66.28	5	5	22	86	10.1857	7.04932	0.947187	9	10.1493	1.00216	7	11.5304	1.00588	6	15.8965	1.09226	9	5.65378	1.02025	7	11.4273	1.00482	6	2.74121	0.934742	9	5.62372	0.985164	7	9.04497	0.982199	6	23.9534	1.07715	9	12.7161	1.04324	7	8.24787	0.98772	6	3.92953
A0A024R5Z9	Pyruvate kinase OS=Homo sapiens GN=PKM2 PE=3 SV=1 - [A0A024R5Z9_HUMAN]	65.35	4	35	587	531	58.0249	7.7085	1.01976	6	8.35891	1.00608	4	5.94265	0.950236	4	18.9651	0.940661	5	10.8709	0.962351	4	0.790014	1.03068	4	5.98819	1.01178	6	5.58579	1.03224	4	10.8363	0.677064	4	11.7747	1.05218	6	15.7507	1.01687	4	9.16733	1.26402	4	5.0618
P09525	Annexin A4 OS=Homo sapiens GN=ANXA4 PE=1 SV=4 - [ANXA4_HUMAN]	65.2	20	21	169	319	35.8601	6.12549	0.912152	49	6.39412	0.998592	62	11.5658	1.08541	49	14.1555	1.16285	49	7.10548	1.02365	62	8.75432	0.968923	49	9.89884	0.917876	49	7.17855	0.998035	62	8.46624	1.01369	49	19.7726	1.11451	49	10.1049	0.969004	62	8.10029	0.958312	49	10.8412
Q9H0U4	Ras-related protein Rab-1B OS=Homo sapiens GN=RAB1B PE=1 SV=1 - [RAB1B_HUMAN]	65.17	5	12	169	201	22.1572	5.73193	0.942792	13	7.89558	1.02961	20	7.07646	0.933584	20	7.10457	1.02348	13	12.6832	0.992828	20	9.60517	1.0551	20	5.1536	1.04708	13	12.0343	1.04223	20	7.37748	0.873971	20	26.4915	0.950157	13	7.44278	0.942942	20	10.5595	1.08457	20	13.7079
Q9Y5J7	Mitochondrial import inner membrane translocase subunit Tim9 OS=Homo sapiens GN=TIMM9 PE=1 SV=1 - [TIM9_HUMAN]	65.17	5	5	12	89	10.3711	7.21045	0.923279	2	12.8786	1.00453	4	4.78843	0.878264	6	13.2725	1.07736	2	13.2814	1.04493	4	6.96273	1.02881	6	4.0118	1.03974	2	2.04593	0.961664	4	4.70701	1.0114	6	6.00515	0.992193	2	1.18285	1.04858	4	2.58047	1.06917	6	5.67604
O75531	Barrier-to-autointegration factor OS=Homo sapiens GN=BANF1 PE=1 SV=1 - [BAF_HUMAN]	65.17	5	5	22	89	10.052	6.0874	0.992545	8	12.5542	1.06252	6	3.6142	0.978861	8	8.22469	0.974638	8	12.9726	1.01462	6	15.4439	0.958051	8	10.6427	0.959241	8	11.4158	0.984996	6	25.5983	0.871658	8	14.9595	1.02446	8	20.2608	0.990389	6	11.7574	1.09845	8	41.2758
P08758	Annexin A5 OS=Homo sapiens GN=ANXA5 PE=1 SV=2 - [ANXA5_HUMAN]	65	18	20	144	320	35.9144	5.04639	0.981888	40	9.28793	0.988473	52	10.781	0.971861	41	22.5999	1.06564	40	14.8624	1.02397	52	9.88682	1.08291	42	14.1429	0.988753	40	10.2097	1.0324	52	10.0564	0.837797	41	32.0177	0.991505	40	11.361	0.961972	52	11.9473	1.05086	41	12.775
P51858	Hepatoma-derived growth factor OS=Homo sapiens GN=HDGF PE=1 SV=1 - [HDGF_HUMAN]	65	14	15	85	240	26.7719	4.729	1.04172	27	7.11799	0.998348	28	9.18612	0.929903	28	13.1389	1.0013	27	5.90427	1.00618	28	8.96903	1.0286	28	11.534	0.945086	27	7.18555	1.00969	28	9.34958	1.02071	28	9.2452	0.999378	27	12.3629	0.99652	28	8.0753	1.02921	28	10.8144
P63104	14-3-3 protein zeta/delta OS=Homo sapiens GN=YWHAZ PE=1 SV=1 - [1433Z_HUMAN]	64.9	11	17	347	245	27.7277	4.79248	1.01613	49	9.26072	1.00536	79	7.43898	0.950442	63	12.7722	0.955851	49	13.2011	0.999224	79	6.83373	1.06297	63	8.09084	1.06509	49	5.7861	1.01576	79	7.88309	0.974489	63	10.0867	0.959992	49	10.8352	0.989013	79	5.24133	0.995603	63	8.42631
O00244	Copper transport protein ATOX1 OS=Homo sapiens GN=ATOX1 PE=1 SV=1 - [ATOX1_HUMAN]	64.71	3	3	8	68	7.39674	7.23975	1.08009	3	4.27097	1.05247	3	4.02633	0.97046	2	8.2666	1.03467	3	1.67167	0.972217	3	3.01808	1.00603	2	4.46253	0.981558	3	3.18041	0.976939	3	0.669999	0.98379	2	9.4662	0.912317	3	0.874028	0.994874	3	0.283568	1.03326	2	8.35512
B4DY28	cDNA FLJ61189, highly similar to Cysteine and glycine-rich protein 1 OS=Homo sapiens PE=2 SV=1 - [B4DY28_HUMAN]	64.71	10	10	27	187	20.0284	8.48486	0.978468	11	12.1078	0.999001	9	5.98925	1.09828	7	5.46972	1.03712	11	14.6352	0.966225	9	9.81204	0.978118	7	5.34094	1.03305	11	11.8057	0.940575	9	14.8258	1.0701	7	24.173	1.01096	11	11.8426	1.0664	9	12.1605	1.02462	7	6.93781
Q96BS4	FBL protein (Fragment) OS=Homo sapiens GN=FBL PE=2 SV=2 - [Q96BS4_HUMAN]	64.62	17	17	89	260	28.4318	9.42236	1.03276	35	6.6955	1.05476	23	5.8165	0.932702	30	4.74624	0.966961	35	12.2659	1.04953	23	5.79058	1.0951	30	6.91833	1.02836	35	8.85455	0.978009	23	10.8934	0.879301	30	14.6044	0.895569	35	15.1466	0.940104	23	8.69277	1.0513	30	9.29168
P10809	60 kDa heat shock protein, mitochondrial OS=Homo sapiens GN=HSPD1 PE=1 SV=2 - [CH60_HUMAN]	64.57	19	30	472	573	61.0164	5.87158	0.998046	92	12.4834	1.02402	109	9.75447	0.996749	115	12.9373	1.03046	92	11.7807	1.00191	109	8.84228	1.03585	115	10.6203	0.989583	92	6.24677	1.00672	109	7.66483	0.958311	115	12.3565	0.989298	92	12.5161	0.956129	109	10.5237	1.03444	115	12.6285
Q86TY5	Galectin OS=Homo sapiens PE=2 SV=1 - [Q86TY5_HUMAN]	64.46	8	8	21	121	13.8882	9.15869	1.05114	10	4.6226	1.0058	6	6.31909	0.93211	5	1.01971	0.958445	10	7.30107	0.991024	6	7.75447	1.02893	5	7.78878	1.0133	10	7.82873	1.01264	6	6.30479	0.932314	5	6.06285	0.929771	10	8.54527	0.95385	6	6.38037	1.04913	5	7.78507
B4E335	cDNA FLJ52842, highly similar to Actin, cytoplasmic 1 OS=Homo sapiens PE=2 SV=1 - [B4E335_HUMAN]	64.39	6	18	1217	351	39.2005	5.59229	1.04973	86	8.08747	1.06715	129	9.34416	1.01712	126	11.6395	0.969084	86	12.8306	1.0042	128	11.8096	1.06492	127	9.37909	1.0549	87	8.98167	1.04118	129	11.7447	0.824435	125	21.5269	0.89449	86	16.1643	0.896638	128	10.5336	1.09811	127	11.585
P12004	Proliferating cell nuclear antigen OS=Homo sapiens GN=PCNA PE=1 SV=1 - [PCNA_HUMAN]	64.37	14	14	81	261	28.7503	4.69092	1.02181	28	9.45767	0.985894	25	13.3584	1.00198	28	12.7803	1.01125	28	13.6132	1.0484	25	11.2793	0.9796	28	8.45805	1.03679	28	10.9857	1.0024	25	4.76205	0.994259	28	14.0421	0.938589	28	12.3441	0.944573	25	7.46674	1.03815	28	11.5956
A8K486	Peptidyl-prolyl cis-trans isomerase OS=Homo sapiens PE=2 SV=1 - [A8K486_HUMAN]	64.24	12	13	388	165	18.0018	6.90283	0.983075	137	9.15027	0.985339	126	8.90784	1.0492	123	9.54639	1.052	137	8.59518	1.04578	126	6.69272	0.989427	123	7.93356	0.951601	137	7.26278	0.982874	126	6.61411	1.04331	123	15.5837	1.04228	137	9.62684	0.987651	126	7.17361	0.986597	123	11.032
A6NGP5	Hematological and neurological-expressed 1-like protein OS=Homo sapiens GN=HN1L PE=1 SV=2 - [A6NGP5_HUMAN]	64.04	10	10	38	178	18.8944	9.45166	0.979739	15	6.87001	1.00436	16	7.85311	1.10552	7	11.9711	0.997785	15	8.67985	1.02745	16	4.97545	0.864552	7	4.19945	0.996924	15	6.8783	0.982559	16	6.58279	1.15581	7	3.09103	0.988467	15	13.5117	0.979126	16	7.27496	0.899203	7	5.54404
Q15181	Inorganic pyrophosphatase OS=Homo sapiens GN=PPA1 PE=1 SV=2 - [IPYR_HUMAN]	64.01	15	16	106	289	32.6392	5.85889	0.922372	32	15.9684	0.95926	27	7.87802	0.992431	29	10.7602	1.06609	31	10.5516	1.04114	27	4.57144	1.01914	29	9.76374	0.97367	32	10.2617	1.04268	27	6.16217	0.921795	29	12.377	1.04446	32	19.1033	0.980474	27	6.53595	1.09295	29	14.074
P24534	Elongation factor 1-beta OS=Homo sapiens GN=EEF1B2 PE=1 SV=3 - [EF1B_HUMAN]	64	9	12	126	225	24.7483	4.66553	1.05892	46	11.2582	0.967496	27	9.44309	0.898638	29	14.6015	0.948326	46	9.35198	1.04543	27	8.57888	1.15486	29	8.26892	1.01668	47	6.17542	1.00277	27	5.70108	0.82466	29	19.6173	0.94038	46	13.5282	1.0098	27	6.27586	1.12194	29	8.43313
B2R7D7	cDNA, FLJ93394, highly similar to Homo sapiens anterior gradient 2 homolog (Xenopus laevis) (AGR2), mRNA OS=Homo sapiens PE=2 SV=1 - [B2R7D7_HUMAN]	64	7	8	263	175	19.9946	9.01221	1.00855	57	8.07269	1.09986	78	15.4233	1.07447	71	17.6126	0.990578	57	7.66637	0.9746	78	11.5861	1.05108	71	11.1332	1.01036	57	8.56008	1.00512	78	10.1398	0.856116	71	16.8317	0.953606	57	12.9619	0.917451	78	10.9674	1.07635	71	11.7514
A4UCT0	Fructose-bisphosphate aldolase (Fragment) OS=Homo sapiens PE=2 SV=1 - [A4UCT0_HUMAN]	63.93	1	6	47	122	13.3938	6.771	0.82246	3	1.79899	1.02416	6	2.39016	1.0541	5	2.23822	1.19064	3	4.66368	0.96003	6	4.24922	0.922128	5	10.2326	0.931091	3	0.99863	1.03839	6	5.25189	0.896813	5	4.39128	1.14318	3	3.93019	1.00337	6	3.2042	1.19089	5	8.06385
Q6FH24	Prefoldin subunit 3 OS=Homo sapiens GN=VBP1 PE=2 SV=1 - [Q6FH24_HUMAN]	63.75	11	12	43	160	18.7236	8.30908	1.00161	16	9.04242	0.920337	12	4.14677	0.934498	12	14.3185	0.944197	16	15.4879	1.02996	12	8.90194	1.01174	12	4.5036	1.06319	16	7.1053	1.0042	12	7.83095	1.04133	12	7.12257	1.0075	16	19.521	1.02976	12	8.72275	0.940187	12	10.0106
E7EQ69	N-alpha-acetyltransferase 50 OS=Homo sapiens GN=NAA50 PE=1 SV=1 - [E7EQ69_HUMAN]	63.69	11	11	28	168	19.299	8.80713	1.0867	11	4.2298	0.988051	11	5.53343	0.940207	6	5.94575	0.880699	11	10.4435	0.974031	11	13.2917	1.03501	6	6.89437	1.08127	11	2.77027	1.03068	11	9.80116	1.08134	6	8.30396	0.899448	11	9.50918	1.01035	11	7.36653	0.951732	6	14.7025
C9JFR7	Cytochrome c (Fragment) OS=Homo sapiens GN=CYCS PE=1 SV=1 - [C9JFR7_HUMAN]	63.37	6	6	34	101	11.326	9.65674	0.984747	12	4.94666	0.929128	9	6.04665	0.897483	13	15.2661	0.994848	12	15.1764	1.00638	9	13.728	1.11235	13	11.9202	1.06162	12	7.88263	1.01989	9	6.9079	0.708762	13	29.7481	0.958729	12	11.2944	1.02189	9	18.7826	1.13632	13	13.4209
R4GMU8	Ragulator complex protein LAMTOR5 OS=Homo sapiens GN=LAMTOR5 PE=1 SV=1 - [R4GMU8_HUMAN]	63.29	3	3	7	79	8.2101	5.68115	1.01399	5	4.36628	1.01146	1		0.872728	1		1.03702	5	4.15869	0.972976	1		0.935151	1		0.971956	5	2.31118	1.07539	1		0.930635	1		1.00217	5	2.39172	0.943379	1		1.28497	1
P02545	Prelamin-A/C OS=Homo sapiens GN=LMNA PE=1 SV=1 - [LMNA_HUMAN]	63.25	45	47	427	664	74.0947	7.02002	1.01349	144	8.88149	0.989229	128	8.19645	0.940587	147	13.5009	0.979438	144	10.6167	1.01152	128	9.34458	1.0075	147	8.82277	1.01317	144	8.39176	1.00231	128	8.58065	1.05071	147	10.2978	0.979047	144	13.2406	1.00268	128	6.39997	1.00127	147	8.36014
P21796	Voltage-dependent anion-selective channel protein 1 OS=Homo sapiens GN=VDAC1 PE=1 SV=2 - [VDAC1_HUMAN]	63.25	13	14	234	283	30.7536	8.54346	0.964756	52	10.784	0.985302	42	9.16418	0.955582	52	11.2473	1.04423	52	10.8234	1.02117	42	6.98723	1.02472	52	9.60829	0.970878	52	7.53417	0.989995	42	7.90323	1.0196	52	17.5529	1.03693	52	13.8964	1.04215	42	4.60405	0.976736	52	12.4534
P22626	Heterogeneous nuclear ribonucleoproteins A2/B1 OS=Homo sapiens GN=HNRNPA2B1 PE=1 SV=2 - [ROA2_HUMAN]	63.17	17	21	433	353	37.4067	8.95361	1.00766	127	8.55829	1.00561	105	8.94405	0.9664	107	10.228	0.994831	127	10.4863	0.999453	105	8.01622	1.05703	107	9.45466	1.00769	127	6.80775	0.999414	105	7.65184	1.0007	107	15.1689	0.965751	127	11.006	0.985207	105	8.7902	1.00289	107	10.7607
P62195	26S protease regulatory subunit 8 OS=Homo sapiens GN=PSMC5 PE=1 SV=1 - [PRS8_HUMAN]	63.05	21	22	111	406	45.5971	7.54736	1.02437	44	6.3232	0.961268	34	7.63423	0.92635	28	9.00748	0.937228	44	7.38346	1.01021	34	7.83318	1.05809	28	8.9724	1.03803	44	5.91677	1.03541	34	7.05118	0.965612	28	12.6632	0.947661	44	9.18603	1.01632	34	6.57678	1.02592	28	8.18794
Q9UK20	Ezrin (Fragment) OS=Homo sapiens PE=2 SV=2 - [Q9UK20_HUMAN]	62.96	1	13	67	162	19.5362	9.40771	1.27333	1								1.11612	1								0.596646	1								1.0855	1
Q9H773	dCTP pyrophosphatase 1 OS=Homo sapiens GN=DCTPP1 PE=1 SV=1 - [DCTP1_HUMAN]	62.94	9	9	54	170	18.6694	5.03369	1.07071	18	10.5472	0.989724	16	6.00051	0.922812	20	10.8941	0.947483	18	16.8623	1.04556	16	7.84447	1.04688	20	5.92391	1.05328	18	10.7294	1.01172	16	8.33661	0.931585	20	8.08539	0.906244	18	11.9151	0.988937	16	4.98483	1.03085	20	6.47846
P31939	Bifunctional purine biosynthesis protein PURH OS=Homo sapiens GN=ATIC PE=1 SV=3 - [PUR9_HUMAN]	62.67	31	31	190	592	64.5753	6.7124	1.01771	62	9.59968	1.00807	65	5.27666	0.96942	63	10.5064	0.960046	62	14.4416	0.990026	65	7.69027	1.02807	63	8.67755	1.04022	62	7.68509	1.01383	65	10.4561	0.944858	63	10.3227	0.96019	62	8.78192	0.97535	65	5.6928	1.02326	63	11.0252
B2RA03	cDNA, FLJ94640, highly similar to Homo sapiens keratin 18 (KRT18), mRNA OS=Homo sapiens PE=2 SV=1 - [B2RA03_HUMAN]	62.56	29	31	778	430	48.0005	5.37646	1.03603	219	9.6114	0.991253	255	9.21554	1.00135	262	11.7027	0.90522	219	17.4802	0.994553	255	8.01048	1.02044	262	14.3461	1.0398	219	9.632	1.00503	255	10.0674	1.02903	262	16.5635	0.99496	219	12.9529	1.01188	255	8.13932	0.94285	262	16.3948
Q96EL3	39S ribosomal protein L53, mitochondrial OS=Homo sapiens GN=MRPL53 PE=1 SV=1 - [RM53_HUMAN]	62.5	6	6	18	112	12.0992	8.76318	1.10618	4	2.4382	1.05456	7	3.72268	1.0133	7	9.1261	0.887272	4	4.43052	0.971169	7	11.712	1.03221	7	3.67825	1.05916	4	3.62442	1.01486	7	6.04821	0.950473	7	7.12567	0.873114	4	4.09383	1.01086	7	2.41853	1.0407	7	11.0038
P27348	14-3-3 protein theta OS=Homo sapiens GN=YWHAQ PE=1 SV=1 - [1433T_HUMAN]	62.45	11	17	298	245	27.7468	4.77979	0.966728	32	6.77574	0.990568	49	13.8354	1.06945	48	16.4981	1.02664	32	12.2054	1.01151	49	9.96411	1.05593	48	14.7707	0.996331	32	8.16709	1.02125	49	8.08397	0.905143	48	35.4853	1.03447	32	13.4447	0.959731	49	10.767	1.06898	48	16.7596
P38117	Electron transfer flavoprotein subunit beta OS=Homo sapiens GN=ETFB PE=1 SV=3 - [ETFB_HUMAN]	62.35	17	17	104	255	27.8262	8.104	0.934475	34	5.69623	0.98717	33	5.89917	1.031	37	7.63465	1.11144	34	7.94114	0.999175	33	8.83047	0.955336	37	6.78215	0.947422	34	6.27442	0.999441	33	7.15442	1.02669	37	9.21131	1.07775	34	8.35786	1.00831	33	7.23959	1.00261	37	8.98017
P56385	ATP synthase subunit e, mitochondrial OS=Homo sapiens GN=ATP5I PE=1 SV=2 - [ATP5I_HUMAN]	62.32	5	5	20	69	7.92833	9.34912	1.02506	9	4.25389	0.996881	4	5.86258	1.07145	7	3.19996	0.976286	9	4.91293	1.04506	4	3.46309	1.01068	7	11.9551	0.982314	9	3.50108	0.942489	4	4.43082	1.06149	7	11.8479	1.02532	9	5.09165	1.02481	4	1.13574	0.861221	7	4.73965
P54577	Tyrosine--tRNA ligase, cytoplasmic OS=Homo sapiens GN=YARS PE=1 SV=4 - [SYYC_HUMAN]	62.12	32	33	150	528	59.1061	7.04932	1.0611	52	10.1431	1.01287	42	5.27539	0.861337	55	11.763	0.924101	52	12.5201	0.984279	42	5.84322	1.13186	55	9.14447	1.04683	52	8.62183	0.998776	42	7.27069	0.889336	55	11.1889	0.896944	52	14.1143	0.99668	42	5.48334	1.07926	55	8.20128
P39019	40S ribosomal protein S19 OS=Homo sapiens GN=RPS19 PE=1 SV=2 - [RS19_HUMAN]	62.07	12	12	121	145	16.0505	10.3159	1.07038	56	6.27598	1.0414	33	8.15285	1.01786	31	13.4501	0.899844	56	15.6767	0.886881	33	6.02165	1.01611	31	5.77329	1.07435	56	8.93411	1.0995	33	7.16811	0.924833	31	20.8249	0.898595	56	16.9401	0.945208	33	6.94735	1.00283	31	7.44007
P30041	Peroxiredoxin-6 OS=Homo sapiens GN=PRDX6 PE=1 SV=3 - [PRDX6_HUMAN]	62.05	14	14	101	224	25.0192	6.37939	1.02923	32	7.68176	0.952168	33	9.22168	0.850524	36	16.4947	0.911891	32	13.7157	1.01553	33	7.29683	1.1099	36	8.32244	1.03791	32	9.14298	1.01374	33	8.17342	0.871818	36	17.6645	0.97505	32	11.341	1.00062	33	9.11608	1.11164	36	8.52202
P30086	Phosphatidylethanolamine-binding protein 1 OS=Homo sapiens GN=PEBP1 PE=1 SV=3 - [PEBP1_HUMAN]	62.03	9	9	71	187	21.0437	7.53271	0.948871	22	5.40363	0.904243	27	13.1225	0.92976	22	14.6021	1.03682	22	10.1384	0.904977	27	16.188	0.949782	22	16.5812	0.941866	22	8.40418	1.07992	27	8.65179	1.09593	22	25.4411	1.13965	22	17.9214	1.1258	27	18.3263	0.976086	22	6.12738
O43707	Alpha-actinin-4 OS=Homo sapiens GN=ACTN4 PE=1 SV=2 - [ACTN4_HUMAN]	62.02	40	56	399	911	104.788	5.43994	1.03605	87	6.91772	1.00621	65	6.31494	0.931182	77	10.1931	0.926016	87	10.3029	0.983361	65	6.40951	1.05388	77	7.66384	1.06768	87	9.83408	1.02339	65	8.47596	0.947831	77	10.8953	0.946862	87	9.56484	0.984721	65	7.60361	1.04627	77	8.67469
K7ENT6	Tropomyosin alpha-4 chain (Fragment) OS=Homo sapiens GN=TPM4 PE=1 SV=1 - [K7ENT6_HUMAN]	62.01	1	16	73	179	20.6084	4.61475	0.953232	1		0.99112	1		1.01325	1		1.04457	1		1.0245	1		0.92323	1		0.975795	1		0.954981	1		1.19745	1		1.07812	1		1.03358	1		0.878113	1
G9G6D7	KIAA0101 (Fragment) OS=Homo sapiens GN=KIAA0101 PE=4 SV=1 - [G9G6D7_HUMAN]	61.9	2	2	5	42	4.40639	11.854	1.22246	2	2.51205	1.00886	2	2.14151	1.87553	1		1.05258	2	9.69312	1.17558	2	12.8534	0.260764	1		0.915545	2	12.8148	0.89079	2	5.11262	1.65266	1		0.758995	2	3.71538	0.928757	2	7.95384	0.464319	1
Q53HV2	Chaperonin containing TCP1, subunit 7 (Eta) variant (Fragment) OS=Homo sapiens PE=2 SV=1 - [Q53HV2_HUMAN]	61.69	26	26	161	543	59.3029	7.6499	1.03831	62	6.70334	0.966868	48	7.62394	0.967396	51	7.16847	0.925796	62	11.1534	1.02236	48	6.44945	1.00387	51	7.13461	1.03442	62	6.31627	0.999106	48	6.7038	0.99821	51	13.7424	0.948995	62	12.3121	1.02843	48	6.30876	1.02541	51	9.19396
C9JQ41	Coiled-coil domain-containing protein 58 OS=Homo sapiens GN=CCDC58 PE=1 SV=1 - [C9JQ41_HUMAN]	61.54	7	7	20	130	15.2869	8.88037	0.982201	8	8.09486	0.999957	7	5.65526	0.882036	5	5.94403	1.02432	8	14.4329	1.04646	7	4.95592	1.04534	5	4.38596	1.03552	8	7.18516	0.983758	7	11.3832	1.05094	5	18.0097	0.978126	8	6.15464	1.00081	7	0.378057	1.02688	5	1.20721
P63244	Receptor of activated protein C kinase 1 OS=Homo sapiens GN=RACK1 PE=1 SV=3 - [RACK1_HUMAN]	61.51	18	18	134	317	35.0546	7.69385	1.09296	46	8.66819	1.02938	39	10.0097	1.00772	48	12.068	0.845372	46	16.8238	0.90983	39	8.57569	1.01152	48	9.05778	1.09178	46	12.3599	1.10402	39	8.95369	1.0222	48	15.9627	0.883244	46	15.5462	0.936997	39	7.46971	0.973653	48	11.9151
O75368	SH3 domain-binding glutamic acid-rich-like protein OS=Homo sapiens GN=SH3BGRL PE=1 SV=1 - [SH3L1_HUMAN]	61.4	7	7	33	114	12.7664	5.24951	1.00479	12	6.06816	0.963977	12	3.49241	0.991205	9	2.62445	1.06456	12	6.72774	0.997264	12	6.51839	1.00979	9	3.83409	0.921286	12	9.42083	1.00298	12	7.71682	1.01783	9	9.0951	1.04828	12	9.77851	1.02498	12	3.96968	1.0691	9	9.78819
A0A0S2Z4Q3	CCHC-type zinc finger nucleic acid binding protein isoform 1 (Fragment) OS=Homo sapiens GN=CNBP PE=2 SV=1 - [A0A0S2Z4Q3_HUMAN]	61.18	9	9	38	170	18.7292	7.7085	1.07479	14	9.59423	0.958096	11	2.78223	0.952033	13	21.286	0.871947	14	13.5337	1.02089	11	11.0368	0.924751	13	9.63392	1.07337	14	6.5231	0.983001	11	4.13052	1.09988	13	12.4047	0.886893	14	10.4513	1.01119	11	9.42897	1.25465	13	16.6704
P50990	T-complex protein 1 subunit theta OS=Homo sapiens GN=CCT8 PE=1 SV=4 - [TCPQ_HUMAN]	61.13	34	34	286	548	59.5825	5.60498	1.02736	103	7.58979	0.95125	85	8.12994	0.937792	98	12.045	0.900324	103	11.0231	1.04864	85	6.46614	1.03518	98	7.62008	1.06261	103	7.95303	0.988087	85	6.20472	1.04351	98	9.05253	0.963716	103	9.78949	1.02419	85	4.74335	0.970828	98	8.25179
I3L3P7	40S ribosomal protein S15a OS=Homo sapiens GN=RPS15A PE=1 SV=1 - [I3L3P7_HUMAN]	61	2	7	55	100	11.4702	10.1548	1.17824	3	7.25118	1.17589	1		0.947932	3	12.1004	0.744921	3	1.94461	0.821534	1		1.0635	3	3.60233	1.14364	3	1.20563	1.0109	1		1.07955	3	3.68025	0.802498	3	17.3591	0.969535	1		0.919717	3	3.91179
A8K4W0	40S ribosomal protein S3a OS=Homo sapiens GN=RPS3A PE=2 SV=1 - [A8K4W0_HUMAN]	60.98	19	19	170	264	29.9358	9.72998	1.076	76	10.09	1.08572	43	7.9128	0.973457	51	13.4976	0.844256	76	17.5068	0.903651	43	9.8998	1.0255	51	9.75458	1.08706	76	9.52836	1.06926	43	8.65858	0.97253	51	23.9751	0.852333	76	15.2788	0.937897	43	8.71862	0.955122	51	12.6424
P62820	Ras-related protein Rab-1A OS=Homo sapiens GN=RAB1A PE=1 SV=3 - [RAB1A_HUMAN]	60.98	5	12	148	205	22.6634	6.21436	1.01869	11	7.35564	1.01379	12	6.88634	0.931089	9	7.46826	0.970319	11	4.18283	0.977716	12	7.53439	1.07236	9	7.36817	1.04794	11	5.10386	1.06386	12	9.57081	1.07945	9	5.08594	0.915772	11	7.00307	0.957108	12	8.53822	0.980701	9	5.71027
P09211	Glutathione S-transferase P OS=Homo sapiens GN=GSTP1 PE=1 SV=2 - [GSTP1_HUMAN]	60.95	10	11	306	210	23.341	5.64307	0.904313	65	7.38576	0.960231	76	7.91063	1.03666	63	10.5006	1.16489	65	10.2215	1.0101	76	7.543	0.965175	63	9.45312	0.929148	65	11.4927	1.03168	76	9.97321	1.05273	63	14.1931	1.08765	65	12.9499	1.02082	76	8.14944	0.96702	63	9.61075
A0A024QZP7	Cell division cycle 2, G1 to S and G2 to M, isoform CRA_a OS=Homo sapiens GN=CDC2 PE=1 SV=1 - [A0A024QZP7_HUMAN]	60.94	13	15	60	297	34.0599	8.39697	1.04273	19	8.40648	1.06258	15	7.71505	1.05395	16	8.62251	0.89364	19	10.8491	0.971724	15	11.5991	1.00433	16	8.17465	1.06647	19	7.4887	1.03647	15	3.01154	0.898277	16	20.6843	0.872794	19	12.7229	0.946916	15	3.33279	0.984027	16	9.70322
B7Z4V2	cDNA FLJ51907, highly similar to Stress-70 protein, mitochondrial OS=Homo sapiens PE=2 SV=1 - [B7Z4V2_HUMAN]	60.9	37	38	358	665	72.3561	5.93506	1.051	123	8.69945	1.0264	114	10.4971	0.880572	114	11.705	0.940748	123	13.3028	0.991797	114	9.74425	1.11786	114	8.32483	1.01328	123	8.6912	1.00196	114	9.239	0.898944	113	14.2737	0.912678	123	13.0286	0.98027	114	8.65222	1.06382	114	8.82347
P21266	Glutathione S-transferase Mu 3 OS=Homo sapiens GN=GSTM3 PE=1 SV=3 - [GSTM3_HUMAN]	60.89	6	14	58	225	26.5421	5.5415	0.939517	5	5.52551	0.908099	9	10.8473	0.973012	7	15.2355	1.09491	5	6.82612	1.02951	9	13.789	0.975381	7	1.86553	0.960129	5	9.0794	1.00812	9	11.5184	1.12276	7	7.18049	1.08245	5	5.53217	1.01309	9	6.00449	0.861938	7	3.64071
Q29926	HLA-A protein (Fragment) OS=Homo sapiens GN=HLA-A PE=2 SV=1 - [Q29926_HUMAN]	60.71	1	2	2	56	6.01394	7.28369							1.03682	1								0.801077	1								1.18624	1								1.03316	1
P54920	Alpha-soluble NSF attachment protein OS=Homo sapiens GN=NAPA PE=1 SV=3 - [SNAA_HUMAN]	60.68	14	14	29	295	33.2113	5.36377	0.970626	15	10.3885	1.0093	8	3.55808	0.983184	6	2.72826	1.02919	15	11.095	1.0479	8	4.82268	1.03662	6	7.62037	1.02008	15	7.67616	1.00075	8	5.9117	0.893198	6	25.5348	0.961015	15	15.5252	0.957708	8	4.88942	1.04571	6	15.5954
P48739	Phosphatidylinositol transfer protein beta isoform OS=Homo sapiens GN=PITPNB PE=1 SV=2 - [PIPNB_HUMAN]	60.52	12	14	43	271	31.5199	6.87354	1.01779	16	5.26082	0.956844	7	1.51032	0.87794	8	6.67331	0.951223	16	7.00884	1.06032	7	5.02871	1.0772	8	5.08301	1.02185	16	8.21018	0.997	7	4.81262	1.00486	8	12.419	1.00446	16	10.1428	1.01705	7	3.64701	1.02441	8	3.81023
Q04917	14-3-3 protein eta OS=Homo sapiens GN=YWHAH PE=1 SV=4 - [1433F_HUMAN]	60.16	11	15	188	246	28.201	4.84326	0.981209	17	6.40899	0.906604	22	8.06573	0.950261	13	9.43846	0.987171	17	9.51073	1.08038	22	8.36697	1.00375	13	4.87256	0.981127	17	1.97159	0.969421	22	11.6698	1.13225	13	6.21983	1.06851	17	7.25258	1.01675	22	8.50011	0.917439	13	13.7503
B3KX11	T-complex protein 1 subunit gamma OS=Homo sapiens PE=2 SV=1 - [B3KX11_HUMAN]	60.15	31	31	205	522	57.909	6.93213	1.03161	86	7.17891	0.953611	53	7.58665	0.966733	66	14.1164	0.942861	86	11.4055	1.04049	53	7.21071	1.03589	66	9.37567	1.03829	86	8.61578	0.98103	53	6.36426	0.97469	66	13.3192	0.956096	86	13.0495	1.02425	53	5.37054	1.00088	66	9.47958
Q96C01	Protein FAM136A OS=Homo sapiens GN=FAM136A PE=1 SV=1 - [F136A_HUMAN]	60.14	8	8	17	138	15.6307	7.60596	1.09798	7	2.98088	1.05785	3	0.551923	0.934869	7	15.8168	1.0012	7	9.14231	0.982304	3	10.1388	1.05315	7	12.3778	0.987122	7	2.77819	0.961153	3	8.98518	1.04295	7	14.9957	0.864022	7	8.48629	0.981593	3	3.73411	0.96057	7	21.8288
Q15907	Ras-related protein Rab-11B OS=Homo sapiens GN=RAB11B PE=1 SV=4 - [RB11B_HUMAN]	60.09	11	12	58	218	24.4735	5.93506	0.926891	19	7.56243	0.968369	17	10.3136	1.02912	19	9.15223	1.08045	19	9.21034	1.04177	17	6.24252	1.00363	19	9.4501	0.951073	19	10.0811	0.982257	17	7.10446	0.928959	19	19.9003	1.09669	19	9.34966	1.01523	17	4.72651	0.987811	19	10.3963
A0A024R201	Proteasome (Prosome, macropain) 26S subunit, non-ATPase, 13, isoform CRA_a OS=Homo sapiens GN=PSMD13 PE=4 SV=1 - [A0A024R201_HUMAN]	59.84	20	20	71	376	42.8911	5.80811	1.00558	26	5.28637	0.995528	24	8.8874	0.989154	21	5.63084	1.05033	26	11.266	1.01453	24	6.54956	1.04069	21	9.39931	0.991043	26	7.09874	0.976139	24	5.86128	0.929055	21	21.6061	0.992311	26	7.05769	1.02834	24	5.29226	0.999552	21	7.79481
P18669	Phosphoglycerate mutase 1 OS=Homo sapiens GN=PGAM1 PE=1 SV=2 - [PGAM1_HUMAN]	59.84	12	12	173	254	28.7858	7.18115	0.942384	59	8.536	0.990772	58	8.42248	1.00371	56	10.1395	1.0607	59	10.5373	1.01066	58	9.28065	0.969441	56	11.9812	0.992411	59	4.44395	1.03423	58	8.29992	1.0069	56	16.2345	1.01404	59	8.11675	0.990203	58	7.03727	0.995889	56	13.8141
J3KPX7	Prohibitin-2 OS=Homo sapiens GN=PHB2 PE=1 SV=2 - [J3KPX7_HUMAN]	59.73	18	18	159	298	33.2189	9.83252	1.03334	52	6.70168	1.00096	61	6.95892	0.944153	46	12.0633	0.955512	52	8.92684	1.02589	61	8.28665	1.0657	46	9.43902	1.02361	52	10.8327	0.961502	61	10.7269	0.945088	46	25.1035	0.976321	52	11.3613	1.01203	61	7.59102	0.998911	46	12.6167
M0R210	40S ribosomal protein S16 OS=Homo sapiens GN=RPS16 PE=1 SV=1 - [M0R210_HUMAN]	59.69	10	10	112	129	14.41	10.228	1.11794	47	12.1541	0.98914	32	12.0802	0.964489	33	18.5341	0.745027	47	22.0548	0.894127	32	7.81832	1.08649	33	15.1392	1.13314	47	7.39115	1.1211	32	7.81851	1.03468	33	9.41278	0.878345	47	15.7414	0.981224	32	6.44659	0.810313	33	17.6638
P00491	Purine nucleoside phosphorylase OS=Homo sapiens GN=PNP PE=1 SV=2 - [PNPH_HUMAN]	59.52	15	15	100	289	32.0972	6.94678	0.977261	34	7.54982	0.964058	32	7.41204	0.963579	34	8.68739	1.00187	34	13.0187	1.05298	32	7.20833	1.05621	34	9.49323	1.00667	34	6.99327	0.988195	32	5.26318	0.961708	34	16.9761	1.02161	34	9.1251	1.01331	32	6.63841	0.971123	34	11.9834
H3BRU6	Poly(rC)-binding protein 2 (Fragment) OS=Homo sapiens GN=PCBP2 PE=1 SV=1 - [H3BRU6_HUMAN]	59.47	4	12	87	301	31.6903	8.44092	1.02119	9	8.12017	1.03455	12	7.31686	1.10839	9	6.29975	1.00153	9	8.17681	1.03223	12	8.02304	1.08627	9	3.33339	0.998291	9	7.26139	0.971321	12	9.33639	0.773802	9	28.5032	0.962079	9	7.30439	1.00242	12	4.38223	1.07604	9	5.80427
F8VVQ7	LIM domain and actin-binding protein 1 (Fragment) OS=Homo sapiens GN=LIMA1 PE=1 SV=1 - [F8VVQ7_HUMAN]	59.46	1	8	28	111	12.6695	9.84717	0.892399	1								1.05317	1								0.829247	1								1.36542	1
A0A0J9YXB3	Uncharacterized protein OS=Homo sapiens PE=4 SV=1 - [A0A0J9YXB3_HUMAN]	59.39	4	9	57	165	18.8387	8.54346	0.962018	6	6.52922	1.0106	8	9.8743	0.900392	6	11.0923	1.03817	6	3.3715	1.01311	8	4.28499	1.13691	6	6.43116	1.05151	6	5.25984	1.02585	8	8.58173	0.907138	6	9.49958	0.943562	6	11.3884	0.967977	8	7.47484	1.02618	6	3.98507
Q02878	60S ribosomal protein L6 OS=Homo sapiens GN=RPL6 PE=1 SV=3 - [RL6_HUMAN]	59.38	19	19	98	288	32.7076	10.5796	1.05839	32	7.4007	1.13204	37	9.09302	1.00382	28	13.3015	0.82814	32	12.3973	0.850137	36	8.07484	1.02415	28	12.3804	1.18327	32	10.8966	1.15154	37	11.4464	0.986904	28	13.8286	0.782006	32	14.2893	0.85076	37	15.7646	1.01253	28	12.743
Q9H3K6	BolA-like protein 2 OS=Homo sapiens GN=BOLA2 PE=1 SV=1 - [BOLA2_HUMAN]	59.3	2	4	17	86	10.1102	6.52197	1.05812	4	4.81116	1.10919	1		1.09347	2	13.9133	0.995674	4	13.3131	1.00848	1		1.02572	2	21.6002	1.0212	4	8.89587	1.04355	1		0.949705	2	21.1904	0.859138	4	10.1032	0.834996	1		0.903243	2	7.02172
V9HW35	Epididymis secretory protein Li 55 OS=Homo sapiens GN=HEL-S-55 PE=2 SV=1 - [V9HW35_HUMAN]	59.26	8	8	73	162	17.02	7.23975	0.949973	32	12.3749	0.955306	20	6.23927	1.00102	21	6.52242	1.08005	32	6.72798	1.02913	20	5.70452	1.05977	21	7.93282	0.960454	32	9.28142	1.01241	20	3.73641	0.772306	21	18.0029	1.05056	32	13.8118	0.996649	20	6.9542	1.09514	21	13.0647
P78371	T-complex protein 1 subunit beta OS=Homo sapiens GN=CCT2 PE=1 SV=4 - [TCPB_HUMAN]	59.07	26	26	217	535	57.4521	6.45557	1.04945	93	9.54407	1.01155	62	7.49911	0.983703	60	11.2006	0.958259	93	14.1128	0.981181	62	8.66068	1.03675	60	6.42827	1.04071	93	8.14474	1.04431	62	7.50938	0.960089	60	22.0335	0.912985	93	13.386	0.973039	62	9.74818	1.04318	60	12.5723
P07355	Annexin A2 OS=Homo sapiens GN=ANXA2 PE=1 SV=2 - [ANXA2_HUMAN]	59	22	22	558	339	38.5798	7.75244	1.04362	182	8.02688	1.0289	182	7.79964	0.957971	188	11.824	0.935443	182	12.6241	0.989664	179	8.95572	1.018	191	10.2705	1.04463	182	8.08515	1.01709	184	7.96461	0.942206	191	15.6708	0.933787	182	11.7865	0.969141	183	7.01728	1.07959	190	10.8076
A7BI36	p180/ribosome receptor OS=Homo sapiens GN=RRBP1 PE=2 SV=2 - [A7BI36_HUMAN]	58.96	62	63	180	1540	165.649	8.96826	0.995545	60	8.1074	1.05149	59	6.44805	1.03035	59	9.76066	1.04889	60	8.48345	0.938922	59	7.30511	0.926797	59	7.63874	0.958207	60	7.0704	1.02976	59	6.56242	1.12761	59	9.54638	1.03191	60	7.93317	0.988512	59	7.00003	0.91753	59	7.78108
P13667	Protein disulfide-isomerase A4 OS=Homo sapiens GN=PDIA4 PE=1 SV=2 - [PDIA4_HUMAN]	58.91	38	38	230	645	72.887	5.07178	0.971035	71	7.44936	1.06719	68	6.11451	1.03437	81	10.8059	1.05238	71	7.03186	0.975361	68	7.52844	0.955452	81	7.26953	1.0114	71	6.59689	1.02079	68	9.652	1.05152	81	10.6947	1.00111	71	8.29789	0.923126	68	7.79517	0.947816	81	8.46261
B4DWS9	cDNA FLJ57640, highly similar to Serpin B5 OS=Homo sapiens PE=2 SV=1 - [B4DWS9_HUMAN]	58.89	1	14	90	287	32.4394	6.53662	0.927851	2	5.37326	0.902503	2	1.08699	0.879752	2	3.31477	1.1589	2	7.67635	1.03715	2	6.05469	0.963232	2	4.41292	0.88561	2	17.5914	1.0434	2	2.52516	1.08918	2	3.97729	1.1264	2	5.86197	1.03113	2	2.20297	1.06658	2	1.61424
O95433	Activator of 90 kDa heat shock protein ATPase homolog 1 OS=Homo sapiens GN=AHSA1 PE=1 SV=1 - [AHSA1_HUMAN]	58.88	16	16	48	338	38.2503	5.52881	0.95606	14	5.85738	0.911266	18	8.2263	1.02876	16	8.60842	1.00786	14	7.29759	1.02432	18	6.19554	0.961387	16	7.7814	0.999953	14	5.08452	1.00044	18	7.82211	1.08291	16	13.5091	1.08055	14	7.69017	1.03249	18	3.55417	0.93123	16	13.5679
P67936	Tropomyosin alpha-4 chain OS=Homo sapiens GN=TPM4 PE=1 SV=3 - [TPM4_HUMAN]	58.87	6	22	97	248	28.5045	4.69092	1.03678	8	3.01764	0.986907	5	1.51533	1.06842	4	7.47174	0.960127	8	19.3303	1.01987	5	6.40147	0.976988	4	10.8017	1.00589	8	13.8534	1.07603	5	3.37016	1.09881	4	3.77724	0.939498	8	7.98293	0.962889	5	4.15601	0.917152	4	12.1224
P35232	Prohibitin OS=Homo sapiens GN=PHB PE=1 SV=1 - [PHB_HUMAN]	58.82	15	15	108	272	29.7859	5.75732	1.02841	34	4.68279	1.01071	36	10.6816	0.93556	38	7.27874	0.978136	34	5.56786	1.03812	36	6.74266	1.07233	38	4.08587	1.02354	34	4.84234	0.996023	36	11.4499	0.968172	38	16.6884	0.938013	34	10.0726	1.00291	36	6.42803	1.0103	38	6.89989
P51148	Ras-related protein Rab-5C OS=Homo sapiens GN=RAB5C PE=1 SV=2 - [RAB5C_HUMAN]	58.8	6	9	92	216	23.4678	8.41162	1.01796	27	6.03282	1.0141	18	8.45247	1.01758	22	13.8988	1.00925	27	9.37787	0.980127	18	7.39282	1.02215	22	10.3299	1.02042	27	5.56092	1.00929	18	6.36247	0.85652	22	25.9996	1.00207	27	11.105	0.990537	18	4.69597	1.03645	22	13.1169
P61513	60S ribosomal protein L37a OS=Homo sapiens GN=RPL37A PE=1 SV=2 - [RL37A_HUMAN]	58.7	6	6	41	92	10.2685	10.4331	1.1217	17	10.7541	1.00861	12	7.12986	0.998794	12	9.99969	0.742001	17	15.1075	0.904453	12	6.48713	0.976007	12	12.9297	1.14338	17	10.5994	1.08456	12	2.1238	0.942929	12	20.3602	0.849666	17	15.2435	0.92971	12	10.6704	0.994231	12	23.5766
P34932	Heat shock 70 kDa protein 4 OS=Homo sapiens GN=HSPA4 PE=1 SV=4 - [HSP74_HUMAN]	58.69	41	45	238	840	94.2712	5.18604	1.00613	75	6.68222	0.949126	72	8.83429	0.916712	70	11.0327	0.962711	75	9.8302	1.03254	72	7.90957	1.05044	70	7.59948	1.03128	75	6.41929	1.00401	72	7.61217	1.03557	70	13.1247	1.00106	75	9.25665	1.01422	72	7.05497	0.981835	70	12.373
P36952	Serpin B5 OS=Homo sapiens GN=SERPINB5 PE=1 SV=2 - [SPB5_HUMAN]	58.67	6	19	137	375	42.0734	6.04932	0.955529	23	8.60762	0.927663	16	8.43045	0.990737	14	11.8196	1.10174	23	10.9744	1.03786	16	5.17614	1.03849	14	5.44753	0.936214	23	8.30307	1.0239	16	6.21713	0.946585	14	19.8844	1.1106	23	7.85084	1.02865	16	10.9035	0.966918	14	14.0543
P07108	Acyl-CoA-binding protein OS=Homo sapiens GN=DBI PE=1 SV=2 - [ACBP_HUMAN]	58.62	4	4	111	87	10.038	6.56592	0.945247	45	9.09602	0.982716	36	8.68915	1.03652	30	7.76253	1.13203	45	11.8468	1.00521	36	5.80405	0.973947	30	4.7365	0.919843	45	7.16684	1.00096	36	5.23093	1.03202	30	13.6897	1.05108	45	8.66801	0.977365	36	9.12959	0.935305	30	6.44105
B5BUB1	RuvB-like helicase (Fragment) OS=Homo sapiens GN=RUVBL1 PE=2 SV=1 - [B5BUB1_HUMAN]	58.55	20	20	120	456	50.1843	6.41748	0.991467	43	9.02082	0.9983	39	5.60736	0.977869	37	10.369	0.987133	43	9.37443	1.01161	39	6.92456	1.10865	37	11.0729	0.999092	43	7.28004	0.997612	39	6.54121	0.894119	37	21.2798	0.989164	43	12.2175	0.984783	39	6.01251	1.05683	37	11.8758
P14868	Aspartate--tRNA ligase, cytoplasmic OS=Homo sapiens GN=DARS PE=1 SV=2 - [SYDC_HUMAN]	58.48	28	28	119	501	57.1	6.55127	0.980816	40	6.33971	0.991683	39	4.97879	0.987847	40	10.6824	0.971347	40	7.88126	0.999173	39	7.24455	1.03855	40	11.5912	1.00035	40	8.23265	1.0007	39	4.03104	0.950986	40	18.8145	1.0266	40	10.46	0.99871	39	7.22527	1.01462	40	9.35983
P50991	T-complex protein 1 subunit delta OS=Homo sapiens GN=CCT4 PE=1 SV=4 - [TCPD_HUMAN]	58.44	27	28	211	539	57.8878	7.82568	1.00968	84	8.55332	0.973288	66	8.78109	0.961079	55	11.425	0.970088	84	9.16737	0.999108	66	8.2589	1.02852	55	7.86145	1.05315	84	8.39584	1.01208	66	7.66255	0.991211	55	13.5401	0.94202	84	9.73694	1.00783	66	6.83727	1.0137	55	10.264
O14737	Programmed cell death protein 5 OS=Homo sapiens GN=PDCD5 PE=1 SV=3 - [PDCD5_HUMAN]	58.4	7	7	43	125	14.2763	6.03662	0.960373	15	3.93158	0.98415	13	5.11838	0.995297	15	10.3921	1.03538	15	5.41976	1.01345	13	2.79852	1.04285	15	5.88187	0.991648	15	6.03366	1.00195	13	3.85326	0.879684	15	21.1545	1.01117	15	6.82965	0.979201	13	6.98899	1.07969	15	12.3774
Q02790	Peptidyl-prolyl cis-trans isomerase FKBP4 OS=Homo sapiens GN=FKBP4 PE=1 SV=3 - [FKBP4_HUMAN]	58.39	24	24	142	459	51.7721	5.42725	0.93589	54	10.0791	0.983215	44	11.7429	1.02488	44	11.2162	1.02226	54	9.80894	0.978675	44	7.52293	0.967436	44	9.92939	0.993401	54	11.4976	1.01232	44	9.32198	1.06246	44	15.7115	1.05155	54	11.0742	1.00878	44	8.80371	0.976797	44	8.03583
P62979	Ubiquitin-40S ribosomal protein S27a OS=Homo sapiens GN=RPS27A PE=1 SV=2 - [RS27A_HUMAN]	58.33	2	9	240	156	17.9535	9.64209	1.14949	13	9.95304	1.0968	7	3.61881	0.969071	7	5.37235	0.754185	13	19.8714	0.831693	7	2.7365	1.01815	7	14.7978	1.06569	13	14.9865	1.20937	7	7.56825	1.0635	7	5.66627	0.7811	13	23.6456	0.86524	7	5.61828	1.06899	7	6.51241
H0YKF9	Aldehyde dehydrogenase family 1 member A3 (Fragment) OS=Homo sapiens GN=ALDH1A3 PE=1 SV=8 - [H0YKF9_HUMAN]	58.33	1	8	50	144	16.3151	5.59229							1.48508	1								0.612675	1								0.771037	1								1.31661	1
Q9UHS8	PRO1975 OS=Homo sapiens PE=2 SV=1 - [Q9UHS8_HUMAN]	58.27	22	22	83	393	44.1187	9.02686	1.00815	24	6.1081	1.01547	31	5.11284	0.954927	28	15.0632	0.99918	24	11.0534	1.02783	31	6.84796	1.03818	28	7.74948	1.00644	24	9.72909	0.968085	31	5.95096	0.947376	28	20.3664	0.994808	24	11.7193	0.997843	31	7.46815	1.03406	28	9.95786
A0A024RB99	Serine hydroxymethyltransferase OS=Homo sapiens GN=SHMT2 PE=3 SV=1 - [A0A024RB99_HUMAN]	58.18	22	24	127	483	53.4214	8.14795	1.06174	38	5.35888	1.00594	23	7.29622	0.878383	28	12.0624	0.88794	38	7.91594	1.02851	23	8.49935	1.11383	28	7.95149	1.07468	38	6.49136	0.985668	23	4.9616	0.879773	28	10.6944	0.916021	38	14.0706	0.993355	23	5.41891	1.10267	28	9.95877
H0YGT8	Peroxisomal targeting signal 1 receptor (Fragment) OS=Homo sapiens GN=PEX5 PE=1 SV=1 - [H0YGT8_HUMAN]	58.06	1	1	1	31	3.22252	4.23389	1.00412	1								1.10182	1								0.863151	1								1.11155	1
Q9ULC4	Malignant T-cell-amplified sequence 1 OS=Homo sapiens GN=MCTS1 PE=1 SV=1 - [MCTS1_HUMAN]	58.01	8	8	37	181	20.5418	8.82178	1.00372	13	6.55397	1.04681	14	12.5733	0.939758	10	5.41403	1.00919	13	5.3712	0.998908	14	9.07902	1.14546	10	11.4797	1.02329	13	5.16153	1.07308	14	6.57914	0.722624	10	60.9835	0.969706	13	7.22107	0.910968	14	8.12469	1.15975	10	25.1416
M0QZM1	Heterogeneous nuclear ribonucleoprotein M (Fragment) OS=Homo sapiens GN=HNRNPM PE=1 SV=1 - [M0QZM1_HUMAN]	57.96	1	17	126	383	40.0163	6.72705							0.978438	1								0.980984	1								1.22167	1								0.806548	1
D3YTB1	60S ribosomal protein L32 (Fragment) OS=Homo sapiens GN=RPL32 PE=1 SV=1 - [D3YTB1_HUMAN]	57.89	9	9	63	133	15.6067	11.4438	1.06688	25	8.10825	1.10282	21	8.02194	1.03854	17	6.00642	0.836508	25	12.1183	0.912717	21	7.19321	1.01484	17	4.56032	1.17091	25	11.5647	1.07339	21	5.48718	1.07775	17	6.50553	0.798922	25	16.756	0.900077	21	3.10423	0.893345	17	9.71814
Q15149	Plectin OS=Homo sapiens GN=PLEC PE=1 SV=3 - [PLEC_HUMAN]	57.86	261	268	1374	4684	531.466	5.96045	1.07706	489	8.61754	1.03567	409	6.63619	0.879686	432	11.6317	0.875158	489	13.6721	0.919876	409	8.26447	1.07642	433	7.85073	1.07164	489	8.53963	1.05968	409	7.91153	0.95986	432	13.3607	0.901418	489	12.9844	0.972654	409	7.29097	1.0575	432	8.58209
B2RDR4	cDNA, FLJ96732, highly similar to Homo sapiens testis derived transcript (3 LIM domains) (TES), transcript variant 1, mRNA OS=Homo sapiens PE=2 SV=1 - [B2RDR4_HUMAN]	57.72	24	24	160	421	47.9339	7.6792	1.05094	58	7.2145	0.978817	45	8.3183	0.848759	55	12.9395	0.913875	58	6.59346	1.0472	45	6.29746	1.10386	55	7.43292	1.05315	58	8.21729	0.982131	45	7.82759	0.943747	55	10.719	0.927366	58	12.1137	0.99172	45	6.5451	1.02949	55	7.43428
A0A0S2Z4G4	Tropomyosin 3 isoform 1 (Fragment) OS=Homo sapiens GN=TPM3 PE=2 SV=1 - [A0A0S2Z4G4_HUMAN]	57.66	3	21	114	248	29.0147	4.77979	1.03203	2	10.8843	0.931872	4	8.80042	0.815834	3	10.682	0.884011	2	5.70296	1.05168	4	4.29155	1.08203	3	3.22527	1.13405	2	3.74825	0.951944	4	1.11179	1.05893	3	0.377321	0.880606	2	6.40253	1.06854	4	0.873949	1.00347	3	3.94406
Q96AG4	Leucine-rich repeat-containing protein 59 OS=Homo sapiens GN=LRRC59 PE=1 SV=1 - [LRC59_HUMAN]	57.65	18	18	94	307	34.9089	9.56885	1.01756	35	5.23744	1.01178	29	7.20136	0.986536	30	15.2238	0.961878	35	12.0697	1.00187	29	7.01823	1.05979	30	9.76925	1.02011	35	6.28307	1.00754	29	8.17489	0.967231	30	17.9605	0.979501	35	13.6708	0.986073	29	6.7081	1.01689	30	8.97777
G3V295	Proteasome subunit alpha type OS=Homo sapiens GN=PSMA6 PE=1 SV=1 - [G3V295_HUMAN]	57.64	12	12	86	203	22.8273	8.32373	1.04373	26	5.32161	0.951555	29	7.60883	0.911798	31	8.08794	0.931628	26	7.62099	1.02479	29	5.74252	1.04583	31	10.153	1.04416	26	4.52211	0.99015	29	7.44586	0.959728	31	18.8254	0.980269	26	7.47738	1.02833	29	5.3015	1.02865	31	6.40478
P00338	L-lactate dehydrogenase A chain OS=Homo sapiens GN=LDHA PE=1 SV=2 - [LDHA_HUMAN]	57.53	20	21	347	332	36.6654	8.26514	0.945928	118	8.08093	1.00547	102	8.91914	1.04779	108	10.6869	1.07176	118	8.79102	0.974399	102	7.27045	0.960835	108	9.85728	0.986209	118	6.58171	1.03456	102	10.4496	0.972102	108	16.1258	1.05473	118	10.073	0.975521	102	8.7715	0.972934	108	12.9415
P11142	Heat shock cognate 71 kDa protein OS=Homo sapiens GN=HSPA8 PE=1 SV=1 - [HSP7C_HUMAN]	57.43	27	40	787	646	70.8542	5.51611	1.03148	193	8.97584	1.01613	168	8.472	0.998306	180	11.7558	0.960582	193	12.4459	0.990314	168	7.36617	1.02465	180	9.00134	1.02657	193	9.67366	1.0312	168	8.96125	0.997335	180	16.1643	0.92536	193	12.6425	0.954362	168	8.65438	0.973463	180	9.9133
S4R456	40S ribosomal protein S15 (Fragment) OS=Homo sapiens GN=RPS15 PE=1 SV=1 - [S4R456_HUMAN]	57.35	4	4	19	68	8.02147	11.4731	1.13935	6	6.77497	1.09237	6	4.858	0.969613	7	4.57262	0.831396	6	5.69867	0.819855	6	3.85495	1.03997	7	5.59534	1.19558	6	3.16789	1.18501	6	4.98942	1.02464	7	6.48656	0.728915	6	3.91527	0.862748	6	11.4071	0.923574	7	4.43188
B1AK87	Capping protein (Actin filament) muscle Z-line, beta, isoform CRA_a OS=Homo sapiens GN=CAPZB PE=1 SV=1 - [B1AK87_HUMAN]	57.31	16	17	97	260	29.2768	6.91748	0.994962	25	4.38895	0.957253	32	10.3608	0.945739	33	5.95189	0.967269	25	7.7328	0.988329	32	9.13053	0.988691	33	7.90778	1.01042	25	5.64902	1.00924	32	6.81424	1.07124	33	5.94497	1.03387	25	12.6332	1.04382	32	6.36435	0.973487	33	7.4624
P63167	Dynein light chain 1, cytoplasmic OS=Homo sapiens GN=DYNLL1 PE=1 SV=1 - [DYL1_HUMAN]	57.3	2	4	11	89	10.3591	7.40088	1.00622	2	6.64969	1.04953	2	0.655082	1.16525	2	13.4083	0.975693	2	9.9575	0.982167	2	1.43138	0.855354	2	9.32437	1.03749	2	9.91391	0.977211	2	1.24767	1.13012	2	14.31	0.964662	2	15.994	0.988314	2	1.77267	0.875364	2	24.7881
P15531	Nucleoside diphosphate kinase A OS=Homo sapiens GN=NME1 PE=1 SV=1 - [NDKA_HUMAN]	57.24	1	8	162	152	17.1377	6.18896	1.04458	5	0.958872	0.96189	3	5.33707	0.640874	2	13.6295	0.921613	5	5.15472	1.07792	3	9.55597	0.849471	2	15.8354	1.06877	5	9.23231	0.947045	3	9.27855	0.687466	2	11.2033	0.884712	5	22.4125	1.0112	3	3.94112	1.85839	2	18.7753
P06899	Histone H2B type 1-J OS=Homo sapiens GN=HIST1H2BJ PE=1 SV=3 - [H2B1J_HUMAN]	57.14	2	9	365	126	13.8956	10.3159	1.11724	3	17.2431	1.00782	8	11.9381	0.967982	10	10.9211	0.874112	3	9.59578	0.964848	8	17.7811	1.00043	10	15.5179	1.02563	3	4.70523	1.09933	8	8.43517	0.947672	10	16.8091	0.777276	3	4.51886	0.973733	8	4.70811	1.06559	10	17.5636
A8K9J7	Histone H2B OS=Homo sapiens PE=2 SV=1 - [A8K9J7_HUMAN]	57.14	2	9	414	126	13.9876	10.3159	0.99725	16	13.0501	1.00797	20	8.64214	1.05626	34	17.3357	0.916885	16	14.2624	1.00021	20	6.6683	0.929163	34	16.7958	1.1071	16	7.31787	1.00166	20	7.99075	0.981581	34	7.0809	0.959885	16	13.8738	0.993628	20	10.1922	1.08322	34	9.88505
E4W6B6	RPL27/NME2 fusion protein (Fragment) OS=Homo sapiens GN=RPL27 PE=2 SV=1 - [E4W6B6_HUMAN]	57.14	7	8	63	126	14.248	10.4624	1.06271	21	5.76461	1.05218	19	6.15726	1.00777	20	10.3668	0.760038	21	11.6502	0.880312	19	11.4035	1.01802	20	7.25929	1.18133	21	8.66371	1.09965	19	7.71035	0.994401	20	12.7146	0.844643	21	10.945	0.898929	19	9.13151	0.99317	20	13.3696
Q14061	Cytochrome c oxidase copper chaperone OS=Homo sapiens GN=COX17 PE=1 SV=2 - [COX17_HUMAN]	57.14	3	3	17	63	6.91038	7.23975	1.05907	5	20.5206	1.12033	5	9.00358	0.944139	7	7.54881	0.901679	5	32.2318	0.95706	5	5.73359	1.0244	7	15.6348	1.01226	5	26.191	0.991182	5	2.97454	1.11553	7	12.2136	0.917753	5	24.9455	0.970355	5	1.01771	0.892331	7	9.97289
B2R6J2	cDNA, FLJ92973, highly similar to Homo sapiens villin 2 (ezrin) (VIL2), mRNA OS=Homo sapiens PE=2 SV=1 - [B2R6J2_HUMAN]	57	22	40	218	586	69.3577	6.26514	1.07037	48	10.5954	0.989594	35	4.77791	0.887692	41	10.952	0.906605	48	13.4308	1.02128	35	7.72666	1.09192	41	6.62964	1.08201	48	6.32583	0.992715	35	5.15397	0.920785	41	13.5943	0.891763	48	15.6916	1.00622	35	6.19263	1.07106	41	11.4969
Q9UBI6	Guanine nucleotide-binding protein G(I)/G(S)/G(O) subunit gamma-12 OS=Homo sapiens GN=GNG12 PE=1 SV=3 - [GBG12_HUMAN]	56.94	3	3	11	72	8.00117	8.96826	0.94599	5	3.04207	1.02072	3	0.55891	0.93664	3	2.32926	0.989135	5	10.2784	1.0639	3	0.854258	1.10071	3	5.06933	0.93979	5	1.02796	0.996487	3	4.35839	1.08156	3	11.7569	1.10875	5	2.22179	0.984497	3	6.62797	0.904507	3	5.02383
P08238	Heat shock protein HSP 90-beta OS=Homo sapiens GN=HSP90AB1 PE=1 SV=4 - [HS90B_HUMAN]	56.91	27	47	678	724	83.2121	5.03369	1.0418	111	8.13517	0.985387	111	8.64461	1.02518	115	10.3353	0.917931	111	17.0186	0.979203	110	8.79708	0.975515	115	11.4372	1.05896	111	8.95727	1.03851	111	8.05308	1.03794	115	18.4946	0.951811	111	13.7997	1.00141	110	9.36484	0.938031	114	11.295
G3V4W0	Heterogeneous nuclear ribonucleoproteins C1/C2 (Fragment) OS=Homo sapiens GN=HNRNPC PE=1 SV=1 - [G3V4W0_HUMAN]	56.87	19	19	217	262	28.8985	8.39697	0.975942	59	8.43749	1.00075	75	7.39206	0.937233	83	13.353	1.0113	59	13.6751	1.01226	75	7.83714	1.06067	83	9.16893	1.00414	59	12.5287	1.03827	75	8.37054	0.953487	83	16.8441	0.977614	59	14.1582	0.961932	75	7.48226	1.05299	83	12.0055
B2R5M8	Isocitrate dehydrogenase [NADP] OS=Homo sapiens PE=2 SV=1 - [B2R5M8_HUMAN]	56.76	24	25	205	414	46.6195	7.00537	0.981257	87	12.1182	0.993949	58	10.4236	0.916398	55	10.4644	1.0158	87	7.05354	0.9978	58	7.29788	1.07296	55	8.9878	0.984441	87	6.54596	1.01813	58	7.43406	0.994773	55	12.4558	1.0239	87	8.57987	1.00574	58	7.44787	1.01967	55	11.076
O00151	PDZ and LIM domain protein 1 OS=Homo sapiens GN=PDLIM1 PE=1 SV=4 - [PDLI1_HUMAN]	56.53	14	14	47	329	36.049	7.02002	1.0756	16	10.8899	1.02931	16	7.83955	0.97927	15	7.03359	0.943292	16	11.2078	1.04008	16	6.34647	1.04921	15	6.84757	1.02238	16	8.75324	0.974897	16	8.72778	0.981622	15	10.361	0.943019	16	15.2986	0.960415	16	7.96916	0.999419	15	6.76329
P04406	Glyceraldehyde-3-phosphate dehydrogenase OS=Homo sapiens GN=GAPDH PE=1 SV=3 - [G3P_HUMAN]	56.42	2	18	796	335	36.0304	8.45557	1.01213	60	8.76493	1.00997	62	8.12741	0.988601	61	10.5433	0.993591	60	11.5231	0.996154	62	7.02513	1.12838	62	8.42918	1.04368	60	7.579	1.02329	62	10.7185	0.780787	61	12.1579	0.9398	60	13.6462	0.974789	62	10.9217	1.06655	62	12.3042
P49411	Elongation factor Tu, mitochondrial OS=Homo sapiens GN=TUFM PE=1 SV=2 - [EFTU_HUMAN]	56.42	22	22	171	452	49.5102	7.60596	0.993698	64	6.98445	1.00399	48	6.75916	0.993283	59	10.4769	0.997726	64	11.8907	1.01253	48	8.46265	1.02103	59	9.74994	0.993868	64	9.09257	0.9935	48	8.11999	0.956956	59	16.4862	1.00975	64	12.043	1.01979	48	9.59919	1.01174	59	10.7803
Q53G71	Calreticulin variant (Fragment) OS=Homo sapiens PE=2 SV=1 - [Q53G71_HUMAN]	56.4	24	24	151	406	46.8901	4.44971	0.910874	47	8.76434	1.05605	56	8.97517	1.13404	48	7.78402	1.12728	47	13.9616	0.96148	56	8.60488	0.904147	48	7.64595	0.967966	47	5.72979	1.02587	56	9.8457	1.15576	48	13.863	1.05133	47	7.15326	0.953865	56	7.24301	0.892887	48	17.162
P62280	40S ribosomal protein S11 OS=Homo sapiens GN=RPS11 PE=1 SV=3 - [RS11_HUMAN]	56.33	11	11	55	158	18.419	10.3013	1.02229	25	14.9775	1.01322	14	17.9626	0.995943	16	9.98456	0.866291	25	14.3848	0.876966	14	6.82862	0.996768	16	16.6903	1.1208	25	14.3621	1.109	14	7.79695	1.09001	16	20.0549	0.865309	25	15.8858	0.974222	14	9.67602	0.87105	16	11.3049
Q08J23	tRNA (cytosine(34)-C(5))-methyltransferase OS=Homo sapiens GN=NSUN2 PE=1 SV=2 - [NSUN2_HUMAN]	56.32	36	36	143	767	86.4158	6.771	1.06211	57	8.95858	0.977275	41	6.76743	0.907945	45	12.8195	0.940478	57	12.9469	1.03001	41	7.86421	1.06981	45	12.995	1.03975	57	6.23294	1.02245	41	8.18067	0.926285	45	15.1251	0.889941	57	10.8657	0.981117	41	6.14164	1.08437	45	11.2402
P08708	40S ribosomal protein S17 OS=Homo sapiens GN=RPS17 PE=1 SV=2 - [RS17_HUMAN]	56.3	8	8	64	135	15.5404	9.84717	0.981564	25	12.947	1.13449	21	6.47121	1.08697	18	7.12282	0.972162	25	16.589	0.844421	21	9.80033	1.04744	18	13.6459	1.05299	25	10.6047	1.16955	21	6.27713	0.697723	18	34.1731	0.941647	25	20.576	0.868653	21	10.3783	1.08515	18	15.8403
Q06323	Proteasome activator complex subunit 1 OS=Homo sapiens GN=PSME1 PE=1 SV=1 - [PSME1_HUMAN]	56.22	15	15	115	249	28.705	6.02393	0.97911	39	8.09819	0.975147	36	9.93397	0.898748	40	12.0906	1.05628	39	11.6897	1.02174	36	7.38291	1.07737	40	8.13352	0.96109	39	12.3916	0.98841	36	5.64357	0.853848	40	25.9469	1.032	39	12.2912	1.00958	36	8.09394	1.10461	40	9.7903
Q59GM9	Alpha-1,4 glucan phosphorylase (Fragment) OS=Homo sapiens PE=2 SV=1 - [Q59GM9_HUMAN]	56.18	2	43	310	865	98.7666	6.96143	0.833009	4	4.58531	1.09227	4	5.38088	0.846476	4	7.38032	1.24129	4	6.73995	0.921194	4	6.35152	1.21758	4	2.78586	1.03867	4	5.79108	1.15462	4	7.00284	0.269003	4	124.965	0.990661	4	5.50262	0.820714	4	13.1822	1.65778	4	11.1869
P61019	Ras-related protein Rab-2A OS=Homo sapiens GN=RAB2A PE=1 SV=1 - [RAB2A_HUMAN]	56.13	10	10	40	212	23.5308	6.53662	0.990474	12	5.79644	1.00664	13	5.34214	1.02235	15	9.54343	1.00333	12	10.4052	1.01504	13	5.22707	1.05533	15	2.64448	0.956293	12	7.4085	0.980529	13	4.71365	1.02429	15	8.45413	1.08455	12	12.5843	1.03433	13	3.71437	0.892996	15	12.5225
Q2TSD0	Glyceraldehyde-3-phosphate dehydrogenase OS=Homo sapiens PE=2 SV=1 - [Q2TSD0_HUMAN]	56.12	1	17	592	335	36.0264	8.45557				1.05015	2	9.42106	0.856224	1					0.863142	2	1.73423	1.15216	1					1.09416	2	2.20496	0.895271	1					0.981579	2	9.97385	1.04574	1
P18085	ADP-ribosylation factor 4 OS=Homo sapiens GN=ARF4 PE=1 SV=3 - [ARF4_HUMAN]	56.11	6	9	80	180	20.4977	7.13721	0.935536	20	13.1529	0.970584	16	8.74181	1.03259	16	10.6325	1.03561	20	12.4463	1.03329	16	9.43082	1.14999	16	14.2223	1.03267	20	5.23164	0.994487	16	5.69651	0.63817	16	56.6104	1.01625	20	15.6267	0.975299	16	8.14088	1.14117	16	22.6041
P04083	Annexin A1 OS=Homo sapiens GN=ANXA1 PE=1 SV=2 - [ANXA1_HUMAN]	56.07	17	17	272	346	38.69	7.02002	1.05604	97	8.25013	1.01587	75	10.478	0.886339	100	15.7549	0.941306	97	14.358	1.01705	75	8.33723	1.14433	100	10.6372	1.04173	97	9.21683	1.01313	75	8.63604	0.767877	100	21.5551	0.908489	97	11.9679	0.96017	75	9.12653	1.15627	100	11.1121
P11216	Glycogen phosphorylase, brain form OS=Homo sapiens GN=PYGB PE=1 SV=5 - [PYGB_HUMAN]	55.87	1	42	310	843	96.6345	6.85889	1.00874	5	8.53312	1.04105	2	8.07276	1.04964	5	8.14917	1.03379	5	12.0674	0.876569	2	1.87293	1.21614	5	9.14357	1.04078	5	2.92712	1.09199	2	5.94098	0.334748	5	76.7745	0.891257	5	4.8737	0.983017	2	1.30886	1.31773	5	13.1747
Q07065	Cytoskeleton-associated protein 4 OS=Homo sapiens GN=CKAP4 PE=1 SV=2 - [CKAP4_HUMAN]	55.81	31	31	99	602	65.9827	5.92236	0.981181	27	5.09988	0.994975	37	8.46221	0.972448	35	13.5602	1.01487	27	8.55513	1.00421	37	6.17367	0.998229	35	8.62637	0.987855	27	5.68502	0.964404	37	5.46987	1.01771	35	11.0352	1.01915	27	8.75967	1.02406	37	6.77562	0.994953	35	10.3877
Q9BWJ5	Splicing factor 3B subunit 5 OS=Homo sapiens GN=SF3B5 PE=1 SV=1 - [SF3B5_HUMAN]	55.81	4	4	10	86	10.1288	6.354	0.976914	3	7.01169	0.938189	4	5.67202	1.04692	3	6.05098	0.978974	3	9.98339	1.05301	4	1.15952	0.991126	3	7.35012	1.06346	3	0.0261065	0.939761	4	1.7139	1.0056	3	2.10438	0.979653	3	1.6409	1.02607	4	8.65701	0.939707	3	0.321364
F8W6I7	Heterogeneous nuclear ribonucleoprotein A1 OS=Homo sapiens GN=HNRNPA1 PE=1 SV=2 - [F8W6I7_HUMAN]	55.7	12	17	238	307	33.1348	9.12939	1.07886	49	8.1995	1.0194	47	7.99205	0.898469	45	9.06109	0.922088	49	10.8338	1.0277	47	10.1353	1.07335	45	9.50392	1.05126	49	7.23337	0.977924	47	9.11554	0.877262	45	19.1967	0.901491	49	8.46097	0.975354	47	5.40661	1.09382	45	15.0568
Q14019	Coactosin-like protein OS=Homo sapiens GN=COTL1 PE=1 SV=3 - [COTL1_HUMAN]	55.63	8	8	23	142	15.935	5.66846	1.04227	8	3.48593	0.94286	6	15.341	0.966177	9	13.9947	0.890706	8	6.88362	1.01375	6	7.05346	1.04066	9	13.9788	1.04087	8	7.93086	0.949221	6	5.53935	1.07247	9	6.98987	1.01263	8	2.51492	1.10655	6	5.40889	0.969536	9	10.3147
P52272	Heterogeneous nuclear ribonucleoprotein M OS=Homo sapiens GN=HNRNPM PE=1 SV=3 - [HNRPM_HUMAN]	55.62	20	36	306	730	77.4643	8.70459	1.02502	69	7.10925	0.998141	53	6.72464	0.959863	59	13.4164	1.01009	69	9.2285	1.0372	53	7.41692	1.03721	59	9.3453	1.01131	69	8.17044	0.964505	53	5.8283	0.952976	59	16.2685	0.985721	69	8.2966	0.983681	53	6.75082	1.02222	59	9.52048
P17987	T-complex protein 1 subunit alpha OS=Homo sapiens GN=TCP1 PE=1 SV=1 - [TCPA_HUMAN]	55.58	16	25	147	556	60.3056	6.11279	1.03011	27	11.3743	0.932594	27	6.23506	0.928229	34	11.2797	0.914176	27	10.1883	1.03252	27	6.14742	1.0716	34	5.35172	1.02766	27	8.60259	1.0041	27	6.46508	1.04033	34	11.2683	0.993055	27	15.9093	1.03177	27	5.36267	0.970397	34	15.0031
P08729	Keratin, type II cytoskeletal 7 OS=Homo sapiens GN=KRT7 PE=1 SV=5 - [K2C7_HUMAN]	55.44	24	31	318	469	51.3543	5.47803	1.0788	52	9.29186	0.941641	30	5.43911	0.854682	48	17.8431	0.785924	52	18.2047	1.06018	30	6.26301	1.1436	48	10.4865	1.1871	52	13.7982	0.999602	30	5.90741	0.881284	48	19.2968	0.810353	52	20.5762	1.01313	30	6.57206	1.09663	48	9.90372
A8K690	cDNA FLJ76863, highly similar to Homo sapiens stress-induced-phosphoprotein 1 (Hsp70/Hsp90-organizing protein) (STIP1), mRNA OS=Homo sapiens PE=2 SV=1 - [A8K690_HUMAN]	55.43	37	37	236	543	62.6154	6.80029	1.00546	76	6.61221	0.945456	76	8.7109	0.897782	84	9.43062	0.971121	76	9.39654	1.0182	76	8.51924	1.04544	84	9.08987	1.02591	76	8.43205	1.02185	76	7.85289	1.0203	84	13.4111	0.993137	76	7.9807	1.03344	76	5.1913	1.02122	84	8.37647
Q04837	Single-stranded DNA-binding protein, mitochondrial OS=Homo sapiens GN=SSBP1 PE=1 SV=1 - [SSBP_HUMAN]	55.41	7	7	34	148	17.249	9.59814	1.00907	12	8.66985	0.981275	12	13.0988	0.9469	10	18.7069	0.963135	12	9.70174	1.03622	12	9.55204	1.10581	10	9.60606	1.06455	12	6.76373	0.949508	12	7.62342	1.01791	10	25.8407	0.99651	12	5.79988	1.00926	12	6.88741	0.992308	10	8.26376
B5BUB5	Autoantigen La (Fragment) OS=Homo sapiens GN=SSB PE=2 SV=1 - [B5BUB5_HUMAN]	55.39	28	28	169	408	46.8382	7.12256	1.06821	56	9.19567	0.948724	61	7.31452	0.942547	52	14.6897	0.914514	56	14.1593	1.01152	61	10.0919	1.06185	52	11.7261	0.985537	56	9.31864	1.01903	61	10.8403	0.996024	52	13.3567	0.997753	56	14.3036	1.0142	61	7.50119	0.990288	52	11.3955
A8K8F0	cDNA FLJ76436 OS=Homo sapiens PE=2 SV=1 - [A8K8F0_HUMAN]	55.37	3	16	81	298	33.1936	5.60498	1.06044	10	4.56847	0.959516	4	7.72024	0.919479	5	12.1215	0.995929	10	8.00969	1.0883	4	3.81155	1.11556	5	2.6449	0.945894	10	7.89361	0.993813	4	2.20175	0.932751	5	12.4986	1.0084	10	9.29382	0.989437	4	2.91168	0.925608	5	14.2999
P30043	Flavin reductase (NADPH) OS=Homo sapiens GN=BLVRB PE=1 SV=3 - [BLVRB_HUMAN]	55.34	8	8	50	206	22.1054	7.6499	0.980884	16	7.43025	0.972141	18	6.13072	0.968776	16	7.02668	1.03932	16	5.11451	1.00159	18	7.2189	1.00274	16	7.82694	0.969809	16	8.82814	1.01099	18	3.95285	1.07482	16	6.81959	1.05146	16	8.40055	1.01398	18	4.97152	0.954663	16	5.30072
V9HWC6	Peptidyl-prolyl cis-trans isomerase OS=Homo sapiens GN=HEL-S-39 PE=2 SV=1 - [V9HWC6_HUMAN]	55.29	12	13	142	208	22.728	9.31982	0.972561	56	15.2909	1.06839	40	7.13232	1.00297	44	10.8115	1.00619	56	17.3143	0.964325	40	10.8418	1.0296	44	6.32486	1.02153	56	7.82694	1.06016	40	13.8407	0.890055	44	29.7231	0.964671	56	13.2486	0.888562	40	17.3113	1.01841	44	15.9959
P20340	Ras-related protein Rab-6A OS=Homo sapiens GN=RAB6A PE=1 SV=3 - [RAB6A_HUMAN]	55.29	1	11	80	208	23.5779	5.5415	0.972721	2	2.10104	1.03096	2	1.54492	0.988707	2	12.901	1.01974	2	12.0359	0.947906	2	1.01157	1.12793	2	3.61504	1.04079	2	2.7978	1.04956	2	5.26921	0.839638	2	7.80067	0.976833	2	4.16601	0.968511	2	8.23935	0.995016	2	25.0206
A0A024R5H8	RAB6A, member RAS oncogene family, isoform CRA_b OS=Homo sapiens GN=RAB6A PE=4 SV=1 - [A0A024R5H8_HUMAN]	55.29	1	11	77	208	23.5339	5.5415	0.958886	2	4.67994	1.07916	1					1.09528	2	11.6581	0.995868	1					0.936115	2	2.11695	1.00412	1					1.07586	2	2.13723	0.917499	1
O43715	TP53-regulated inhibitor of apoptosis 1 OS=Homo sapiens GN=TRIAP1 PE=1 SV=1 - [TRIA1_HUMAN]	55.26	4	4	6	76	8.78011	5.47803	1.22142	2	16.6484	0.977125	2	6.21722	0.991094	2	2.31735	0.800922	2	22.0617	1.07903	2	7.57129	0.997156	2	0.526702	1.06656	2	0.438353	0.975687	2	0.197137	1.02246	2	5.91606	0.759716	2	16.7773	0.975325	2	1.28971	0.988227	2	3.74679
P07437	Tubulin beta chain OS=Homo sapiens GN=TUBB PE=1 SV=2 - [TBB5_HUMAN]	55.18	2	20	467	444	49.639	4.89404	0.957029	10	7.28974	1.09081	14	18.7002	1.05873	11	12.8373	1.02635	10	8.25837	0.976308	14	16.4728	0.975173	11	9.19132	1.04885	10	7.58788	1.01886	14	12.31	0.97951	11	25.4352	0.940274	10	11.1163	0.90286	14	19.8956	1.04062	11	21.3401
P25786	Proteasome subunit alpha type-1 OS=Homo sapiens GN=PSMA1 PE=1 SV=1 - [PSA1_HUMAN]	55.13	15	15	89	263	29.5369	6.60986	1.01247	36	5.49792	0.983797	32	7.61352	0.871332	21	7.65114	1.00651	36	10.8737	1.02814	32	3.39182	1.05512	21	4.06079	0.994468	36	6.63589	0.998381	32	5.48987	0.989383	21	15.5989	1.02137	36	8.81422	1.02497	32	7.51107	1.08544	21	7.2638
P55072	Transitional endoplasmic reticulum ATPase OS=Homo sapiens GN=VCP PE=1 SV=4 - [TERA_HUMAN]	55.09	36	36	275	806	89.2657	5.26221	0.968675	84	8.81378	0.973206	98	7.09295	0.991541	93	11.5063	1.05564	84	10.1795	0.955745	98	9.81308	0.982851	93	10.2791	0.974949	84	7.66448	1.07468	98	7.83343	1.0347	93	11.3246	1.0045	84	10.9223	1.00122	98	8.34068	1.00208	93	10.6983
P19105	Myosin regulatory light chain 12A OS=Homo sapiens GN=MYL12A PE=1 SV=2 - [ML12A_HUMAN]	54.97	9	9	45	171	19.7815	4.80518	1.02827	19	8.20525	1.02791	14	6.90187	0.956159	12	12.7807	0.872603	19	17.8806	0.977747	14	7.49104	1.04634	12	4.23623	1.05106	19	10.198	1.0355	14	8.65451	1.04888	12	11.101	0.938796	19	12.0549	0.940057	14	8.83718	0.93447	12	5.58382
Q9NUQ9	Protein FAM49B OS=Homo sapiens GN=FAM49B PE=1 SV=1 - [FA49B_HUMAN]	54.94	13	13	29	324	36.7246	6.06201	1.02998	9	12.1175	0.9526	10	9.63125	0.902646	10	7.63287	0.936116	9	13.8796	0.993572	10	11.0628	1.03245	10	3.45489	0.99303	9	4.92644	1.01484	10	5.5651	0.972116	10	8.71083	0.979555	9	18.2784	1.03807	10	4.56628	1.02018	10	5.60894
H0YAR2	Polyadenylate-binding protein 1 (Fragment) OS=Homo sapiens GN=PABPC1 PE=1 SV=1 - [H0YAR2_HUMAN]	54.93	2	17	111	284	32.2292	9.0415	0.880608	1		0.942038	1		1.04861	1		1.1939	1		0.95658	1		1.0051	1		0.911704	1		1.03995	1		1.01374	1		1.13791	1		1.06824	1		0.934018	1
O14949	Cytochrome b-c1 complex subunit 8 OS=Homo sapiens GN=UQCRQ PE=1 SV=4 - [QCR8_HUMAN]	54.88	6	6	14	82	9.90012	10.0815	1.0298	6	5.96618	0.951944	5	5.35614	1.01466	3	1.70406	0.915869	6	6.80567	1.06	5	7.76053	1.10297	3	1.92908	1.07671	6	10.2747	0.938188	5	6.20839	1.03123	3	18.0309	0.936242	6	15.6886	1.04525	5	3.47051	0.89896	3	5.23103
Q9HCY8	Protein S100-A14 OS=Homo sapiens GN=S100A14 PE=1 SV=1 - [S10AE_HUMAN]	54.81	5	5	19	104	11.6548	5.23682	0.951455	6	4.16849	0.93808	9	5.48307	1.07741	4	13.6502	1.08284	6	7.06665	1.0292	9	5.87066	0.966757	4	11.5202	0.95818	6	5.09359	1.04847	9	12.7268	1.01134	4	30.6402	1.08306	6	9.4894	1.03864	9	5.35357	0.959262	4	2.52279
Q9Y333	U6 snRNA-associated Sm-like protein LSm2 OS=Homo sapiens GN=LSM2 PE=1 SV=1 - [LSM2_HUMAN]	54.74	5	5	13	95	10.8276	6.52197	0.922095	6	4.50774	1.16397	1		0.992001	6	8.17651	1.01981	6	3.04291	0.808251	1		0.927302	6	11.7778	0.99638	6	6.005	1.17707	1		1.11874	6	9.21492	1.09707	6	10.2356	0.834191	1		0.970884	6	7.30985
P11021	78 kDa glucose-regulated protein OS=Homo sapiens GN=HSPA5 PE=1 SV=2 - [GRP78_HUMAN]	54.59	34	37	507	654	72.2884	5.16064	1.00189	141	8.64335	1.03706	130	7.57046	1.00458	137	9.77471	0.999604	141	12.0275	0.926289	130	7.11148	1.03651	137	8.08306	1.00077	141	8.247	1.04287	130	6.77701	0.974775	137	9.95941	0.990104	141	10.4033	0.968846	130	9.90671	0.97757	137	10.2139
P00492	Hypoxanthine-guanine phosphoribosyltransferase OS=Homo sapiens GN=HPRT1 PE=1 SV=2 - [HPRT_HUMAN]	54.59	10	10	59	218	24.5636	6.68311	0.977426	21	6.46258	0.987714	19	5.53087	0.952373	19	12.3	0.948595	21	13.7711	1.00681	19	7.59836	1.08627	19	7.09439	1.04697	21	13.379	1.04166	19	4.28192	0.897772	19	19.3511	0.93555	21	9.8097	0.958169	19	8.86164	1.05652	19	9.47962
P25398	40S ribosomal protein S12 OS=Homo sapiens GN=RPS12 PE=1 SV=3 - [RS12_HUMAN]	54.55	8	8	85	132	14.5055	7.21045	1.07295	33	8.87494	1.0523	24	7.87766	0.946264	28	12.39	0.886431	33	11.8241	0.91581	24	7.91194	1.04622	28	7.68022	1.08491	33	9.354	1.11082	24	4.26023	0.98691	28	18.7922	0.877783	33	13.9898	0.9239	24	7.24127	0.984188	28	12.1785
E5RK09	E3 SUMO-protein ligase NSE2 (Fragment) OS=Homo sapiens GN=NSMCE2 PE=1 SV=8 - [E5RK09_HUMAN]	54.55	1	1	1	44	4.40202	6.30322				1.08344	1								0.874913	1								1.08777	1								0.945333	1
A8K6Y1	cDNA FLJ75526, highly similar to Homo sapiens proliferation-associated 2G4, 38kDa (PA2G4), mRNA (Fragment) OS=Homo sapiens PE=2 SV=1 - [A8K6Y1_HUMAN]	54.5	18	18	141	367	40.8857	6.40479	1.06604	52	9.33512	0.923717	44	10.059	0.886934	45	10.4242	0.896855	52	13.8482	1.07079	44	8.0304	1.13075	45	7.96166	1.03886	52	8.70589	0.998642	44	7.22905	0.916337	45	16.7448	0.924914	52	11.4887	1.00675	44	6.4034	1.0052	45	12.8401
A0A140VJN8	Perilipin OS=Homo sapiens PE=2 SV=1 - [A0A140VJN8_HUMAN]	54.5	18	18	77	433	46.9179	5.43994	0.979102	25	6.47788	0.984631	26	8.3542	1.01297	26	9.72528	1.10702	25	10.0522	1.00997	26	4.75565	1.00329	26	8.64724	0.92583	25	9.11394	0.99262	26	7.10285	1.01037	26	18.077	1.04921	25	8.39811	1.00889	26	8.14652	0.984298	26	9.94177
Q562Z4	Actin-like protein (Fragment) OS=Homo sapiens GN=ACT PE=4 SV=1 - [Q562Z4_HUMAN]	54.37	2	3	396	103	11.548	7.57666	1.17002	3	14.6605	1.06226	1					0.712263	3	58.9125	1.0086	1					1.2142	3	17.9641	0.840862	1					0.729854	3	48.5036	1.08177	1
O15511	Actin-related protein 2/3 complex subunit 5 OS=Homo sapiens GN=ARPC5 PE=1 SV=3 - [ARPC5_HUMAN]	54.3	8	8	31	151	16.3103	5.66846	1.01163	10	6.77101	1.00868	10	7.16415	1.03153	11	10.7176	1.0026	10	3.658	1.03471	10	4.42694	1.01404	11	4.00257	0.986422	10	3.21322	0.958675	10	6.05229	0.882328	11	18.0881	1.02791	10	6.11517	1.00172	10	3.67583	1.00853	11	3.49329
C9K025	60S ribosomal protein L35a (Fragment) OS=Homo sapiens GN=RPL35A PE=1 SV=1 - [C9K025_HUMAN]	54.26	6	6	31	94	10.6387	10.7114	1.12198	10	6.52248	1.04547	10	7.52821	1.05644	11	14.9833	0.797448	10	17.6617	0.932803	10	6.51195	1.00659	11	4.20044	1.14044	10	9.22801	1.08005	10	9.81182	1.01499	11	12.7761	0.782244	10	10.5604	0.907521	10	7.79674	0.963269	11	10.2121
P46781	40S ribosomal protein S9 OS=Homo sapiens GN=RPS9 PE=1 SV=3 - [RS9_HUMAN]	54.12	14	14	82	194	22.5776	10.6528	1.04427	33	9.43242	1.05141	22	4.27622	0.996231	26	9.26565	0.894774	33	14.0333	0.885339	22	7.0137	1.03862	26	5.60897	1.10109	33	8.04146	1.11873	22	9.92534	0.987603	26	19.863	0.910341	33	15.6933	0.956938	22	8.10075	0.953514	26	8.56341
P31946	14-3-3 protein beta/alpha OS=Homo sapiens GN=YWHAB PE=1 SV=3 - [1433B_HUMAN]	54.07	5	13	251	246	28.0648	4.83057	0.982592	19	8.10128	0.953857	21	6.111	0.882431	20	9.50863	0.980842	19	9.89056	1.03469	21	14.016	1.03168	20	8.28654	1.01208	19	5.1433	1.04808	21	7.49997	0.943845	20	11.6073	0.987653	19	16.1815	0.984915	21	6.93284	1.07162	20	12.4977
Q01082	Spectrin beta chain, non-erythrocytic 1 OS=Homo sapiens GN=SPTBN1 PE=1 SV=2 - [SPTB2_HUMAN]	54.02	94	106	444	2364	274.439	5.56689	1.02209	148	7.46132	1.00828	126	6.89014	0.950074	123	9.22324	0.954886	148	11.9052	0.988631	126	7.19011	1.01551	123	7.89946	1.04089	148	9.07793	0.997304	126	6.50757	0.978119	123	10.6263	0.967272	148	11.7921	0.999174	126	6.49305	1.03464	123	7.83676
F8W7C6	60S ribosomal protein L10 OS=Homo sapiens GN=RPL10 PE=1 SV=2 - [F8W7C6_HUMAN]	53.99	1	8	58	163	18.5527	9.94971	1.06052	2	3.21655	1.15311	3	10.4718	1.08224	3	0.695198	0.992767	2	3.96007	0.942385	3	18.7783	0.954187	3	14.8222	1.00683	2	0.674528	0.944733	3	9.74411	0.853602	3	38.4882	0.92542	2	0.432357	0.903919	3	1.27768	1.07078	3	9.75352
P46783	40S ribosomal protein S10 OS=Homo sapiens GN=RPS10 PE=1 SV=1 - [RS10_HUMAN]	53.94	11	11	117	165	18.8859	10.1548	1.05928	40	11.417	1.08683	41	7.30687	1.00415	36	11.5518	0.898383	40	18.7131	0.859802	41	8.36682	1.02495	36	10.4342	1.11743	40	8.95522	1.12925	41	12.1762	0.902089	36	34.0069	0.869397	40	21.9108	0.944777	41	12.9926	1.03356	36	20.8673
Q9UES0	SNARE protein Ykt6 (Fragment) OS=Homo sapiens PE=2 SV=1 - [Q9UES0_HUMAN]	53.93	10	10	29	191	21.5931	6.55127	1.00117	8	6.29153	0.964863	11	4.61644	0.934663	10	9.98276	0.958157	8	9.8216	1.06652	11	6.2141	1.12192	10	10.8642	1.06951	8	7.41427	0.96038	11	3.34863	0.95751	10	7.22955	0.94157	8	6.56604	1.04465	11	6.52817	1.00925	10	10.126
P62987	Ubiquitin-60S ribosomal protein L40 OS=Homo sapiens GN=UBA52 PE=1 SV=2 - [RL40_HUMAN]	53.91	1	8	215	128	14.719	9.83252							1.05602	2	4.08389							0.946199	2	8.83692							0.945958	2	1.27526							1.07618	2	7.93418
Q96IR1	RPS4X protein (Fragment) OS=Homo sapiens GN=RPS4X PE=2 SV=2 - [Q96IR1_HUMAN]	53.91	14	14	139	243	27.2427	9.93506	1.10446	42	5.89832	1.1405	47	10.7084	1.03665	50	15.7573	0.851757	42	11.2791	0.848053	47	13.2815	1.06621	50	9.66723	1.12002	42	11.2795	1.12659	47	9.93722	0.930901	49	19.4545	0.822597	42	20.0582	0.890706	47	13.598	1.03176	50	18.4644
A0A087WTT1	Polyadenylate-binding protein OS=Homo sapiens GN=PABPC1 PE=1 SV=1 - [A0A087WTT1_HUMAN]	53.83	6	28	190	522	58.4988	9.26123	1.00338	11	9.86425	0.924013	7	11.5137	1.02777	6	8.6446	0.847495	11	11.0071	1.03698	7	10.5466	1.11984	6	2.11728	1.06128	11	12.4991	1.00769	7	4.38294	0.867744	6	11.9604	1.02054	11	11.5084	0.980496	7	2.17478	0.992584	6	8.18542
P23193	Transcription elongation factor A protein 1 OS=Homo sapiens GN=TCEA1 PE=1 SV=2 - [TCEA1_HUMAN]	53.82	14	14	47	301	33.948	8.38232	1.01601	13	5.1978	0.975381	16	3.09003	0.924837	18	10.4033	0.965965	13	6.25924	1.02615	16	4.63689	1.02043	18	10.2117	1.01201	13	11.0503	0.974458	16	4.7717	0.993661	18	18.9304	0.961186	13	7.25269	1.03001	16	3.33746	1.06949	18	10.4345
B4E2J2	cDNA FLJ51755, highly similar to Glutathione S-transferase Mu 3 (EC 2.5.1.18) OS=Homo sapiens PE=2 SV=1 - [B4E2J2_HUMAN]	53.68	1	7	34	136	16.1179	5.17334							0.935478	1								1.07925	1								1.06097	1								0.889166	1
P49458	Signal recognition particle 9 kDa protein OS=Homo sapiens GN=SRP9 PE=1 SV=2 - [SRP09_HUMAN]	53.49	5	5	32	86	10.1051	7.97217	0.960793	12	11.2621	1.03881	10	9.78899	1.04156	10	7.0547	1.02942	12	7.66954	1.0006	10	2.80942	0.943917	10	12.7868	1.00213	12	1.03942	0.958592	10	5.59826	1.13735	10	17.3259	1.00001	12	8.92952	1.00701	10	7.31568	0.895756	10	12.7423
A0A024R652	Methylenetetrahydrofolate dehydrogenase (NADP+ dependent) 1, methenyltetrahydrofolate cyclohydrolase, formyltetrahydrofolate synthetase, isoform CRA_a OS=Homo sapiens GN=MTHFD1 PE=3 SV=1 - [A0A024R652_HUMAN]	53.48	4	44	198	935	101.467	7.18115	1.02418	3	1.68797	1.00706	7	6.33814	0.984122	4	0.795108	1.12917	3	6.73639	0.992555	7	8.59521	0.950764	4	8.09116	0.906936	3	8.17414	1.04847	7	13.0162	0.956776	4	5.69531	1.0167	3	2.11851	0.915495	7	16.4594	1.09645	4	6.32613
Q96IX5	Up-regulated during skeletal muscle growth protein 5 OS=Homo sapiens GN=USMG5 PE=1 SV=1 - [USMG5_HUMAN]	53.45	3	3	8	58	6.45337	9.75928	1.04415	2	9.53256	0.961981	3	5.00618	1.05734	3	13.4309	0.985177	2	4.47444	0.978914	3	15.5068	0.954274	3	11.2949	0.984194	2	6.70174	1.01199	3	8.27836	1.11445	3	1.12204	0.983743	2	1.07755	1.01697	3	3.02483	0.878306	3	1.1041
P82909	28S ribosomal protein S36, mitochondrial OS=Homo sapiens GN=MRPS36 PE=1 SV=2 - [RT36_HUMAN]	53.4	4	4	11	103	11.459	9.99365	0.965046	3	4.3951	1.05118	4	5.91697	0.986831	4	6.13923	1.1152	3	2.92438	1.00021	4	7.56949	1.12414	4	2.17789	0.922086	3	6.61907	0.979963	4	9.61232	0.742715	4	25.9401	1.07264	3	10.3573	0.924305	4	7.17153	1.08328	4	16.2824
P43490	Nicotinamide phosphoribosyltransferase OS=Homo sapiens GN=NAMPT PE=1 SV=1 - [NAMPT_HUMAN]	53.36	21	21	70	491	55.4866	7.15186	0.932946	25	8.78151	0.932309	20	8.14292	0.967762	25	6.23744	1.05656	25	8.44551	1.0458	20	5.97978	1.00905	25	8.51656	0.97842	25	6.05838	1.02462	20	7.46579	0.937977	25	22.9175	1.05411	25	9.59029	1.03929	20	5.43301	1.10072	25	18.7675
Q01469	Fatty acid-binding protein, epidermal OS=Homo sapiens GN=FABP5 PE=1 SV=3 - [FABP5_HUMAN]	53.33	7	7	34	135	15.1546	7.00537	1.03074	9	8.64714	0.984795	12	10.3144	0.937504	13	11.0779	0.930758	9	7.77089	1.01508	12	12.7024	1.00891	13	8.40865	1.06797	9	5.59164	0.988422	12	5.73264	1.0101	13	12.8458	0.954418	9	15.8883	0.973482	12	9.71808	1.00443	13	11.6042
Q92520	Protein FAM3C OS=Homo sapiens GN=FAM3C PE=1 SV=1 - [FAM3C_HUMAN]	53.3	10	10	65	227	24.6646	8.29443	0.905541	19	9.20657	0.961232	24	5.12779	1.04968	22	13.0458	1.09658	19	5.45104	0.966785	24	7.56495	0.89208	22	12.1058	0.923171	19	4.989	1.02884	24	6.2493	1.14202	22	16.0753	1.13368	19	9.2591	1.04407	24	3.42844	0.94021	22	11.8634
P36405	ADP-ribosylation factor-like protein 3 OS=Homo sapiens GN=ARL3 PE=1 SV=2 - [ARL3_HUMAN]	53.3	8	8	23	182	20.4428	7.23975	0.914826	10	13.7222	1.01513	5	9.27952	1.07286	8	13.0219	1.09957	10	14.9176	1.00443	5	4.30284	1.04157	8	5.91352	0.989224	10	4.19682	1.02162	5	3.76844	0.732537	8	22.5484	1.07247	10	9.47855	0.986396	5	6.87727	1.17264	8	9.59293
P62269	40S ribosomal protein S18 OS=Homo sapiens GN=RPS18 PE=1 SV=3 - [RS18_HUMAN]	53.29	11	11	67	152	17.7079	10.9897	1.08041	28	10.0578	1.05959	18	5.19902	1.0743	20	14.6007	0.856094	28	15.0957	0.862387	18	3.29093	0.94085	20	13.2276	1.07918	28	6.7157	1.06743	18	8.32432	1.11879	20	16.1572	0.857253	28	13.7955	0.947209	18	6.27185	0.917271	20	19.6913
Q1RMG2	Adenosylhomocysteinase OS=Homo sapiens GN=AHCY PE=2 SV=1 - [Q1RMG2_HUMAN]	53.27	1	16	74	306	33.7892	6.60986							1.01774	1								0.977219	1								1.03916	1								0.973164	1
Q12904	Aminoacyl tRNA synthase complex-interacting multifunctional protein 1 OS=Homo sapiens GN=AIMP1 PE=1 SV=2 - [AIMP1_HUMAN]	53.21	13	14	70	312	34.3311	8.42627	0.990039	27	6.71366	0.979189	22	6.63874	0.915348	20	9.7687	0.989064	27	10.5229	0.98598	22	4.59351	1.0627	20	8.24976	1.01405	27	6.19475	1.01876	22	9.97898	0.943723	20	11.6729	0.971591	27	19.4126	0.996496	22	7.9872	1.02692	20	7.8105
P14927	Cytochrome b-c1 complex subunit 7 OS=Homo sapiens GN=UQCRB PE=1 SV=2 - [QCR7_HUMAN]	53.15	6	6	19	111	13.522	8.77783	0.835668	4	5.48698	0.982537	8	5.62145	0.945127	7	10.0466	1.0787	4	3.07926	0.985494	8	5.64605	0.927062	7	18.6437	0.912898	4	6.49258	1.02321	8	6.68452	1.10393	7	16.4218	1.30054	4	5.92332	1.04527	8	5.84786	0.987097	7	13.8909
Q9Y5M8	Signal recognition particle receptor subunit beta OS=Homo sapiens GN=SRPRB PE=1 SV=3 - [SRPRB_HUMAN]	53.14	11	11	47	271	29.6838	9.0415	1.03437	16	9.2178	1.01998	17	4.4202	0.878662	14	14.3329	0.947816	16	9.07167	1.02525	17	7.82082	1.03974	14	12.7352	1.01029	16	7.04175	0.968844	17	8.16979	0.865286	14	17.8844	0.913212	16	12.5988	0.973589	17	5.69465	1.11013	14	20.7381
Q9HB71	Calcyclin-binding protein OS=Homo sapiens GN=CACYBP PE=1 SV=2 - [CYBP_HUMAN]	53.07	12	12	60	228	26.1936	8.25049	0.937689	19	7.51337	0.978196	21	8.76354	0.89168	20	16.7331	1.02352	19	16.1524	0.992296	21	9.06025	0.998846	20	8.66822	1.01371	19	6.33971	1.07645	21	14.2018	1.09212	20	18.8556	1.0664	19	9.12238	1.01633	21	12.3477	1.00513	20	11.8988
X6RFL8	Ras-related protein Rab-14 (Fragment) OS=Homo sapiens GN=RAB14 PE=1 SV=1 - [X6RFL8_HUMAN]	53.04	7	8	34	181	20.3963	6.32861	1.01437	7	7.00475	0.978627	7	6.33883	0.930901	7	4.35548	1.02763	7	5.05383	0.964527	7	3.95068	1.03265	7	5.49198	0.974688	7	3.43136	0.958986	7	4.64327	1.05576	7	5.33766	1.01695	7	2.78617	1.01637	7	2.74581	0.993341	7	4.10583
P54136	Arginine--tRNA ligase, cytoplasmic OS=Homo sapiens GN=RARS PE=1 SV=2 - [SYRC_HUMAN]	53.03	32	32	170	660	75.3309	6.68311	1.01956	67	7.46753	0.981025	46	6.91715	0.918153	57	10.0062	0.965117	67	12.0459	1.00519	46	7.69955	1.09337	57	9.68194	1.03834	67	8.30317	1.03057	46	9.68761	0.913578	57	16.2069	0.943771	67	13.5658	0.98716	46	8.1541	1.05738	57	7.94261
B3KQT9	Protein disulfide-isomerase OS=Homo sapiens PE=2 SV=1 - [B3KQT9_HUMAN]	52.92	22	28	321	480	54.0685	7.21045	0.960373	102	8.05364	1.04778	80	7.63975	1.0138	82	9.97906	1.05606	102	11.86	0.950405	80	9.26073	1.01658	82	10.4057	0.975866	102	6.81224	1.0276	80	6.5751	1.00946	82	17.6067	1.05218	102	9.88927	0.990916	80	6.12636	0.997573	82	11.779
Q9Y266	Nuclear migration protein nudC OS=Homo sapiens GN=NUDC PE=1 SV=1 - [NUDC_HUMAN]	52.87	19	20	99	331	38.2191	5.37646	1.04499	34	6.37135	0.986334	31	10.5676	0.915013	30	17.8342	0.908766	34	9.40861	1.05719	31	5.06971	1.04403	30	6.24866	1.07636	34	7.76805	1.00358	31	10.1267	1.04783	30	8.35888	0.933903	34	10.0028	1.00971	31	6.10977	0.968988	30	5.9257
Q07955	Serine/arginine-rich splicing factor 1 OS=Homo sapiens GN=SRSF1 PE=1 SV=2 - [SRSF1_HUMAN]	52.82	13	13	103	248	27.7278	10.3599	1.03497	41	6.86449	0.991006	30	5.68988	1.00797	32	7.9831	1.00093	41	9.69045	1.06051	30	5.81682	1.00364	32	7.44237	0.974436	41	8.75489	0.946152	30	5.78306	1.00203	32	12.9932	0.990397	41	7.60103	0.99951	30	7.42942	0.9802	32	12.3552
P05091	Aldehyde dehydrogenase, mitochondrial OS=Homo sapiens GN=ALDH2 PE=1 SV=2 - [ALDH2_HUMAN]	52.8	18	20	87	517	56.3456	7.04932	0.987031	30	10.7453	1.01752	28	4.3585	0.961957	23	6.02559	1.00269	30	10.1014	0.986246	28	6.35196	1.02518	23	7.0669	1.00012	30	5.00267	1.01163	28	4.80147	0.977914	23	11.6663	1.02961	30	7.47569	1.00165	28	8.67317	1.00916	23	8.3059
P30084	Enoyl-CoA hydratase, mitochondrial OS=Homo sapiens GN=ECHS1 PE=1 SV=4 - [ECHM_HUMAN]	52.76	14	14	50	290	31.3671	8.07471	1.02625	14	7.97668	1.01802	15	8.89507	0.964081	21	12.355	1.04279	14	15.2514	1.05764	15	6.84165	1.03524	21	8.74066	0.961459	14	7.05909	0.984259	15	7.24474	0.9183	21	25.0393	0.977064	14	17.3196	0.976586	15	7.76718	1.02759	21	13.7091
A0A087X163	Ras-related protein Rab-18 OS=Homo sapiens GN=RAB18 PE=1 SV=1 - [A0A087X163_HUMAN]	52.75	8	8	24	182	20.4072	4.99561	1.02919	8	9.03157	0.982018	10	7.21494	1.01211	6	6.73557	0.961075	8	8.94992	0.992866	10	10.1464	1.00189	6	8.26915	0.95262	8	10.6307	1.00501	10	4.63069	0.983723	6	3.28082	1.07551	8	19.6596	0.996589	10	2.63614	1.00002	6	3.51242
R4GNH3	26S protease regulatory subunit 6A OS=Homo sapiens GN=PSMC3 PE=1 SV=1 - [R4GNH3_HUMAN]	52.72	19	19	122	423	47.3225	5.22412	1.01316	46	7.47173	0.990104	39	7.3059	0.98079	36	12.3935	1.00407	46	11.452	1.00607	39	4.71425	1.04965	36	7.73882	1.02824	46	8.02887	1.00774	39	7.39956	0.86935	36	22.6535	0.968941	46	9.38216	1.01589	39	7.3606	1.06857	36	12.801
O60869	Endothelial differentiation-related factor 1 OS=Homo sapiens GN=EDF1 PE=1 SV=1 - [EDF1_HUMAN]	52.7	8	8	23	148	16.3589	9.94971	1.1485	9	5.5384	1.05777	7	5.60103	0.956997	7	16.9992	0.840127	9	7.93556	0.935621	7	7.02796	0.929003	7	8.40517	1.128	9	3.08098	1.09202	7	5.8722	1.16266	7	6.74726	0.794455	9	9.05591	0.951573	7	7.04827	0.895134	7	8.47612
Q96T46	Hemoglobin alpha 2 (Fragment) OS=Homo sapiens GN=HBA2 PE=3 SV=1 - [Q96T46_HUMAN]	52.63	1	4	27	76	8.38623	7.13721							1.14395	1								0.492437	1								1.94798	1								0.520211	1
P00441	Superoxide dismutase [Cu-Zn] OS=Homo sapiens GN=SOD1 PE=1 SV=2 - [SODC_HUMAN]	52.6	6	6	44	154	15.9259	6.12549	0.959836	18	9.45109	0.964742	12	8.63931	0.984403	14	7.83784	1.08941	18	8.92215	1.05194	12	5.75739	1.00176	14	5.74852	0.934262	18	9.35827	0.935311	12	8.23947	1.11838	14	12.3512	1.08725	18	12.2609	1.04969	12	8.96573	0.921624	14	7.87927
Q99471	Prefoldin subunit 5 OS=Homo sapiens GN=PFDN5 PE=1 SV=2 - [PFD5_HUMAN]	52.6	7	7	35	154	17.317	6.32861	1.04333	12	10.2768	1.04336	13	12.6169	0.922738	10	11.7637	0.973975	12	11.3354	0.93985	13	11.7355	1.00289	10	10.858	1.02054	12	9.2768	1.04103	13	7.42217	1.02138	10	33.2981	0.933322	12	9.66058	0.932339	13	9.51235	1.05616	10	16.9245
Q13813	Spectrin alpha chain, non-erythrocytic 1 OS=Homo sapiens GN=SPTAN1 PE=1 SV=3 - [SPTN1_HUMAN]	52.59	116	118	428	2472	284.364	5.35107	0.997077	152	6.9525	0.999499	122	6.47882	0.960981	152	9.66528	0.992152	152	8.22726	1.00399	122	6.44658	1.02013	152	7.68734	1.01058	152	6.85479	1.02091	122	5.97951	1.01904	152	15.425	0.974265	152	9.22095	0.989236	122	5.32849	1.00022	152	10.1425
P20339	Ras-related protein Rab-5A OS=Homo sapiens GN=RAB5A PE=1 SV=2 - [RAB5A_HUMAN]	52.56	5	8	47	215	23.6438	8.14795	1.02435	5	9.59882	0.966182	6	4.46244	0.930276	7	10.6293	0.964953	5	10.4729	0.985682	6	5.78388	1.02427	7	12.1419	0.990299	5	3.47028	1.01037	6	1.17642	1.09158	7	4.91185	0.957277	5	12.7252	1.01644	6	9.79516	0.949909	7	4.8019
Q9Y230	RuvB-like 2 OS=Homo sapiens GN=RUVBL2 PE=1 SV=3 - [RUVB2_HUMAN]	52.48	23	23	106	463	51.1246	5.64307	1.03439	34	10.0948	0.985356	35	7.97877	0.981199	37	7.30169	0.968997	34	8.02044	1.03995	35	8.10899	1.04342	37	8.97332	0.999603	34	7.33935	0.966235	35	6.86836	0.946186	37	9.94136	0.968193	34	13.4006	0.987729	35	6.14035	1.04326	37	8.22595
P09972	Fructose-bisphosphate aldolase C OS=Homo sapiens GN=ALDOC PE=1 SV=2 - [ALDOC_HUMAN]	52.47	12	19	107	364	39.4312	6.87354	0.911763	19	8.5726	1.029	29	6.54867	1.11567	24	12.9882	1.16507	19	13.1673	0.94284	28	10.4045	0.926652	24	9.72946	0.945517	19	9.22507	1.04942	29	13.3602	1.06232	24	11.7474	1.09727	19	8.07401	0.967077	29	7.4963	0.965731	24	5.59094
P07900	Heat shock protein HSP 90-alpha OS=Homo sapiens GN=HSP90AA1 PE=1 SV=5 - [HS90A_HUMAN]	52.46	26	47	677	732	84.6067	5.021	1.00499	111	7.57122	0.975015	108	9.32287	0.986865	112	10.2587	0.992556	111	17.166	0.985212	108	7.99144	1.02942	112	10.4512	1.03432	111	9.19672	1.05154	108	7.0341	1.01873	112	18.3108	0.963783	111	9.1503	0.990976	108	7.21339	0.966143	112	8.84357
P47755	F-actin-capping protein subunit alpha-2 OS=Homo sapiens GN=CAPZA2 PE=1 SV=3 - [CAZA2_HUMAN]	52.45	9	11	78	286	32.9286	5.84619	0.997	24	5.31391	0.998365	20	7.61788	1.01428	21	9.57819	1.02277	24	10.0733	0.994175	20	7.23436	1.07798	21	13.3185	1.00906	24	7.20038	1.09505	20	7.54584	0.887131	21	20.1053	0.992634	24	8.85991	0.945448	20	6.94126	0.993526	21	13.4204
P62805	Histone H4 OS=Homo sapiens GN=HIST1H4A PE=1 SV=2 - [H4_HUMAN]	52.43	7	7	655	103	11.3604	11.356	1.06297	210	8.39862	1.07544	223	7.40054	0.988538	222	10.9333	0.898241	210	14.6358	0.991674	223	7.71049	1.11698	222	10.0977	1.05419	210	9.25418	0.966517	223	7.01287	0.798012	222	16.7692	0.908849	210	13.3938	0.957123	223	7.45489	1.07516	222	8.40045
Q8TD06	Anterior gradient protein 3 OS=Homo sapiens GN=AGR3 PE=1 SV=1 - [AGR3_HUMAN]	52.41	6	7	109	166	19.1589	7.98682	1.07708	22	11.7372	1.11301	15	6.73759	1.07581	16	11.8063	0.930681	22	13.3166	0.961544	15	8.97507	1.01135	16	13.92	1.06207	22	9.46779	0.987533	15	7.874	0.879437	16	15.9019	0.878639	22	15.1836	0.891668	15	11.2906	0.997614	16	14.1789
O00625	Pirin OS=Homo sapiens GN=PIR PE=1 SV=1 - [PIR_HUMAN]	52.41	13	13	41	290	32.0933	6.91748	0.960779	13	8.26072	1.01278	15	8.26324	1.09281	13	14.6226	1.14387	13	5.32085	0.946376	15	10.6087	0.923075	13	6.74646	0.903116	13	7.27097	1.06208	15	5.32668	1.10831	13	22.9275	1.08145	13	8.65288	0.968235	15	5.83074	0.885136	13	9.24219
E9PKG1	Protein arginine N-methyltransferase 1 OS=Homo sapiens GN=PRMT1 PE=1 SV=1 - [E9PKG1_HUMAN]	52.31	16	16	62	325	37.6848	6.15088	1.04449	30	6.28104	0.968667	16	6.46765	1.01639	16	4.40494	0.892661	30	11.2791	1.07883	16	7.42168	0.99093	16	7.53948	1.04043	30	8.13751	0.941967	16	8.42517	1.12244	16	14.5307	0.955546	30	9.68071	0.990555	16	7.21132	0.865682	16	8.14363
P42704	Leucine-rich PPR motif-containing protein, mitochondrial OS=Homo sapiens GN=LRPPRC PE=1 SV=3 - [LPPRC_HUMAN]	52.3	71	71	481	1394	157.805	6.12549	0.99177	173	9.81995	1.00226	148	7.62186	1.03648	160	10.7052	1.00166	173	12.8724	0.992868	148	8.32528	1.00049	160	8.20575	0.995617	173	8.71026	0.985277	148	8.47512	0.991013	160	18.8868	0.997028	173	12.0505	0.99748	148	7.68691	0.983561	160	11.5812
B3KTM6	Ribosomal protein L5, isoform CRA_b OS=Homo sapiens GN=RPL5 PE=2 SV=1 - [B3KTM6_HUMAN]	52.23	14	14	108	247	28.0262	9.12939	1.06728	39	5.04352	1.03802	34	6.35215	0.950165	34	10.9291	0.860629	39	12.8111	0.932102	34	7.6305	1.01668	34	9.30519	1.11749	39	11.2506	1.08991	34	5.12601	1.03333	34	14.4173	0.841225	39	16.7202	0.946324	34	4.44849	0.96588	34	13.6305
C9JZG2	Trifunctional purine biosynthetic protein adenosine-3 (Fragment) OS=Homo sapiens GN=GART PE=1 SV=1 - [C9JZG2_HUMAN]	52.21	1	6	25	136	14.4514	8.49951	0.917834	1		0.98219	1		0.948002	1		1.29289	1		1.1245	1		0.926709	1		0.806628	1		0.864769	1		1.13967	1		1.14244	1		1.03677	1		0.997861	1
B4DK69	Aldo-keto reductase family 1 member C2 OS=Homo sapiens GN=AKR1C2 PE=1 SV=1 - [B4DK69_HUMAN]	52.19	10	15	54	297	33.8126	8.52881	0.661995	11	42.5182	0.791664	12	26.5762	0.854917	7	30.5843	1.23297	11	29.0538	0.822956	12	15.5969	0.779848	7	14.2739	0.700387	11	26.1775	1.2555	12	23.026	1.46933	7	7.8721	1.50121	11	25.9207	1.14907	12	14.7268	0.695768	7	23.6102
B2R8Z8	cDNA, FLJ94136, highly similar to Homo sapiens synaptotagmin binding, cytoplasmic RNA interacting protein (SYNCRIP), mRNA OS=Homo sapiens PE=2 SV=1 - [B2R8Z8_HUMAN]	52.17	20	28	203	623	69.5587	8.76318	1.02606	50	7.92481	1.00678	44	8.65056	0.967419	48	11.3499	0.981873	50	15.8901	1.02249	44	7.01181	1.05522	48	10.1559	1.03849	50	8.49731	1.02444	44	8.75312	0.855713	48	19.2388	0.943055	50	14.2311	0.974461	44	9.17301	1.07981	48	10.3042
Q8WUW1	Protein BRICK1 OS=Homo sapiens GN=BRK1 PE=1 SV=1 - [BRK1_HUMAN]	52	4	4	12	75	8.73946	5.45264	1.02102	2	8.51764	0.964238	6	8.43373	1.05781	4	15.437	1.03842	2	2.24022	0.962575	6	4.2226	1.02115	4	7.68619	0.961981	2	2.94851	1.03676	6	2.07393	0.845564	4	42.5549	0.997556	2	14.5504	1.03579	6	4.73882	0.997148	4	8.61477
P22061	Protein-L-isoaspartate(D-aspartate) O-methyltransferase OS=Homo sapiens GN=PCMT1 PE=1 SV=4 - [PIMT_HUMAN]	51.98	11	11	31	227	24.6206	7.21045	0.963967	11	12.8312	0.95572	12	7.94552	0.969347	8	6.89603	1.16618	11	14.0324	1.02671	12	4.55344	0.970065	8	8.27874	0.983122	11	10.1879	1.01381	12	5.17052	1.07471	8	9.69908	1.05633	11	5.0222	1.03432	12	10.7409	1.0323	8	8.5264
O95336	6-phosphogluconolactonase OS=Homo sapiens GN=PGLS PE=1 SV=2 - [6PGL_HUMAN]	51.94	10	10	56	258	27.5296	6.04932	0.976196	22	6.88836	1.02769	17	5.0698	0.99285	17	8.43059	1.06482	22	12.3091	0.987863	17	7.63643	1.02333	17	4.32782	0.978187	22	5.87712	1.01583	17	7.27027	0.903162	17	5.20678	1.02348	22	10.524	0.960385	17	5.91662	1.07388	17	6.06091
O75367	Core histone macro-H2A.1 OS=Homo sapiens GN=H2AFY PE=1 SV=4 - [H2AY_HUMAN]	51.88	15	17	85	372	39.5925	9.78857	0.959695	31	8.61319	0.995307	25	9.63318	0.95865	23	10.8065	1.07528	31	14.0882	1.00992	25	6.6318	0.985649	23	11.5595	0.963	31	8.65278	0.976672	25	11.7631	0.942468	23	17.7764	1.0281	31	7.58235	1.01759	25	12.1143	1.08306	23	14.5677
P18859	ATP synthase-coupling factor 6, mitochondrial OS=Homo sapiens GN=ATP5J PE=1 SV=1 - [ATP5J_HUMAN]	51.85	6	6	22	108	12.5796	9.5249	0.991727	7	8.04276	0.965934	7	1.70141	0.889734	7	8.81611	1.07177	7	12.5056	1.08681	7	5.69122	1.0595	7	14.7488	0.911818	7	5.83813	0.907622	7	7.48014	1.0238	7	6.70355	1.00919	7	12.3904	0.981207	7	7.71119	0.950056	7	9.22271
P05198	Eukaryotic translation initiation factor 2 subunit 1 OS=Homo sapiens GN=EIF2S1 PE=1 SV=3 - [IF2A_HUMAN]	51.75	16	16	90	315	36.0894	5.08447	0.98271	30	7.36251	0.987556	28	7.15517	0.968776	32	15.3259	1.0159	30	14.6545	1.07862	28	6.75826	1.04614	32	9.76024	0.963493	30	8.84292	0.961987	28	8.43402	0.984461	32	12.3668	1.00624	30	15.2329	1.00495	28	5.0858	1.03791	32	8.33929
A8K4Z4	60S acidic ribosomal protein P0 OS=Homo sapiens PE=2 SV=1 - [A8K4Z4_HUMAN]	51.74	13	13	144	317	34.2178	5.97314	0.985189	57	9.84458	1.01292	44	9.48729	0.942605	43	8.69022	1.00843	57	14.1097	0.954827	44	10.2775	1.07158	43	10.053	1.05932	57	5.67543	1.05417	44	8.53241	0.93969	43	21.5748	0.929062	57	10.3125	0.967579	44	8.43217	1.02458	43	10.138
K7EJ05	Syntaxin-10 (Fragment) OS=Homo sapiens GN=STX10 PE=1 SV=1 - [K7EJ05_HUMAN]	51.72	2	2	4	58	6.38519	5.2876	0.903633	1		1.04818	2	1.2556	1.07658	1		0.871418	1		0.919229	2	7.92027	1.04842	1		0.878413	1		1.03018	2	9.0332	0.84507	1		1.44507	1		0.994293	2	3.61804	1.03264	1
P50395	Rab GDP dissociation inhibitor beta OS=Homo sapiens GN=GDI2 PE=1 SV=2 - [GDIB_HUMAN]	51.69	15	19	133	445	50.6309	6.46826	1.0083	48	8.29072	0.988301	36	7.45671	0.978753	31	7.997	0.955628	48	10.4412	1.04345	36	7.88432	1.05651	31	15.0656	1.02319	48	10.1303	1.0204	36	7.78102	0.964705	31	20.6244	0.966671	48	11.4946	0.966315	36	7.19072	1.01708	31	12.1211
Q5RLJ0	CLE OS=Homo sapiens PE=2 SV=1 - [Q5RLJ0_HUMAN]	51.64	12	12	65	244	27.9516	6.44287	1.02392	24	8.16173	1.04153	21	6.01355	0.869328	20	11.7308	1.01945	24	10.5379	1.00001	21	8.11633	1.09425	20	5.09344	1.00673	24	5.56896	1.0347	21	5.60613	0.905128	20	17.8342	0.955266	24	6.55524	0.947302	21	10.5467	1.06102	20	8.87978
A0A0S2Z4I4	Tropomyosin 3 isoform 3 (Fragment) OS=Homo sapiens GN=TPM3 PE=2 SV=1 - [A0A0S2Z4I4_HUMAN]	51.61	0	19	108	248	28.8527	4.75439
E9PQD0	Probable RNA-binding protein EIF1AD OS=Homo sapiens GN=EIF1AD PE=1 SV=1 - [E9PQD0_HUMAN]	51.56	2	2	8	64	7.32701	10.5063	0.94836	3	9.76465	0.997755	3	4.83136	0.948689	2	7.56301	1.01647	3	5.53497	1.02323	3	1.47472	1.01246	2	2.85103	0.949935	3	11.771	0.979053	3	11.7039	1.019	2	8.09015	1.14728	3	8.18034	1.01379	3	4.31553	1.00643	2	11.7775
B4DDQ8	cDNA FLJ50439, highly similar to Phosphoglucomutase-1 (EC 5.4.2.2) OS=Homo sapiens PE=2 SV=1 - [B4DDQ8_HUMAN]	51.51	1	17	70	365	40.2042	5.74463	0.984957	2	1.13288	1.01409	1					1.11429	2	3.35433	1.00664	1					0.998389	2	2.22123	1.04769	1					0.93629	2	2.01006	0.935769	1
A8K4T2	cDNA FLJ76281, highly similar to Homo sapiens DnaJ (Hsp40) homolog, subfamily C, member 7 (DNAJC7), mRNA OS=Homo sapiens PE=2 SV=1 - [A8K4T2_HUMAN]	51.45	23	23	73	484	55.4303	7.34229	1.03713	26	8.19017	0.938924	22	5.40668	0.935622	25	13.0127	0.913212	26	10.5386	1.01577	22	8.54153	1.02157	25	5.32872	1.03785	26	8.93932	0.970384	22	6.2841	1.05868	25	10.1469	0.934088	26	14.7407	1.03953	22	7.28177	0.971294	25	9.47082
Q1KSF8	XTP3TPA-transactivated protein 1 OS=Homo sapiens GN=XTP3TPATP1 PE=2 SV=1 - [Q1KSF8_HUMAN]	51.44	1	11	234	208	23.6107	6.90283	0.84052	1								1.27226	1								0.708737	1								1.41144	1
P10599	Thioredoxin OS=Homo sapiens GN=TXN PE=1 SV=3 - [THIO_HUMAN]	51.43	5	5	90	105	11.7297	4.91943	0.941525	38	13.3349	0.911458	24	12.5552	0.907201	27	14.0526	1.11662	38	14.6321	0.961423	24	10.7713	1.01977	27	5.86274	0.882156	38	20.9007	1.053	24	6.51454	1.11511	27	14.9909	1.15873	38	22.0144	1.07744	24	10.5468	0.980841	27	10.478
B3KNN7	cDNA FLJ30049 fis, clone ADRGL1000033, highly similar to 26S proteasome non-ATPase regulatory subunit 3 OS=Homo sapiens PE=2 SV=1 - [B3KNN7_HUMAN]	51.41	26	26	97	498	57.1966	8.45557	1.05507	40	8.85083	0.915756	30	12.0539	0.94264	27	11.7528	0.919616	40	17.2134	1.06309	30	7.09585	1.04274	27	7.59049	1.01255	40	10.0991	0.968987	30	5.95419	1.08292	27	11.3446	1.02044	40	15.8253	1.05233	30	6.74044	0.930826	27	12.3892
Q9BV57	1,2-dihydroxy-3-keto-5-methylthiopentene dioxygenase OS=Homo sapiens GN=ADI1 PE=1 SV=1 - [MTND_HUMAN]	51.4	8	8	21	179	21.4846	5.68115	1.10844	8	13.3617	1.00967	4	9.16771	0.909186	9	11.5842	0.880121	8	26.8519	0.956891	4	8.4888	1.07425	9	14.0074	1.0151	8	13.5475	1.05991	4	3.01392	0.872244	9	19.1851	0.944631	8	21.2828	0.991396	4	6.6074	1.07533	9	13.3703
P06748	Nucleophosmin OS=Homo sapiens GN=NPM1 PE=1 SV=2 - [NPM_HUMAN]	51.36	16	16	181	294	32.5548	4.77979	1.09132	57	12.2775	1.01052	55	7.64437	0.90007	51	17.0442	0.941459	57	15.8123	1.00249	55	10.0912	1.14907	51	10.4457	1.0393	57	10.3101	0.985835	55	7.86627	0.835303	51	19.4955	0.88052	57	14.3723	0.999716	55	6.90392	1.10729	51	10.5876
B9A067	MICOS complex subunit MIC60 OS=Homo sapiens GN=IMMT PE=1 SV=2 - [B9A067_HUMAN]	51.34	22	35	136	711	78.925	7.06396	0.983831	25	6.44891	1.00747	33	4.83128	0.959832	32	8.37534	0.973094	25	7.36862	1.00094	33	6.67042	1.00148	32	10.993	1.02133	25	6.00154	0.983834	33	7.49428	1.05432	32	14.2504	0.985882	25	8.7113	1.01146	33	6.95544	0.977014	32	8.36807
P35998	26S protease regulatory subunit 7 OS=Homo sapiens GN=PSMC2 PE=1 SV=3 - [PRS7_HUMAN]	51.27	21	21	93	433	48.6031	5.94775	0.994932	35	8.41533	0.960138	26	7.46181	0.975306	32	12.263	0.963074	35	8.88555	1.04477	26	7.68107	0.9957	32	4.49881	0.998154	35	10.5306	0.996798	26	6.91687	1.03025	32	5.87148	1.01222	35	10.9223	1.02689	26	5.21816	1.0007	32	6.21497
B2R9K8	cDNA, FLJ94440, highly similar to Homo sapiens chaperonin containing TCP1, subunit 6A (zeta 1)(CCT6A), mRNA OS=Homo sapiens PE=2 SV=1 - [B2R9K8_HUMAN]	51.22	24	24	172	531	57.9296	6.80029	1.03104	65	7.31111	0.983718	57	10.4546	0.93172	50	11.011	0.946646	65	10.1552	0.9996	57	8.67344	1.02571	50	7.37855	1.04035	65	7.25234	1.05871	57	7.52405	0.976335	50	19.6741	0.960051	65	13.0137	0.998881	57	8.04417	1.0362	50	8.52319
H7BZJ3	Protein disulfide-isomerase A3 (Fragment) OS=Homo sapiens GN=PDIA3 PE=1 SV=1 - [H7BZJ3_HUMAN]	51.22	1	7	79	123	13.5108	7.29834	0.968041	6	2.33933	1.05847	10	4.7535	1.06191	7	6.2023	1.02198	6	4.93031	0.950344	10	3.82938	0.982892	7	1.98964	0.981697	6	4.4388	0.985105	10	3.84643	1.08777	7	3.99183	1.08166	6	6.84072	0.958878	10	7.52921	0.942657	7	5.17458
A0A087X020	Ribosome maturation protein SBDS OS=Homo sapiens GN=SBDS PE=1 SV=1 - [A0A087X020_HUMAN]	51.2	16	16	49	250	28.8463	8.74854	1.03664	15	6.92658	0.953058	12	5.8466	0.917656	19	15.9218	0.877986	15	13.5404	0.995407	12	7.18537	1.09054	19	7.55922	1.06526	15	7.45917	1.01687	12	11.5398	0.953074	19	8.62394	0.937711	15	5.0764	1.02342	12	10.9319	0.999275	19	8.78373
P0DMV9	Heat shock 70 kDa protein 1B OS=Homo sapiens GN=HSPA1B PE=1 SV=1 - [HS71B_HUMAN]	51.17	13	31	360	641	70.009	5.65576	0.927598	44	5.70799	0.957537	40	6.60722	1.03129	33	8.32931	1.1484	44	8.69992	0.928878	40	7.30837	0.94246	33	10.0387	0.942913	44	7.44088	1.12184	40	7.10825	1.11917	33	18.0448	1.05937	44	11.0125	0.991771	40	7.7796	0.916453	33	18.5282
P09429	High mobility group protein B1 OS=Homo sapiens GN=HMGB1 PE=1 SV=3 - [HMGB1_HUMAN]	51.16	11	15	107	215	24.8782	5.74463	0.992651	17	4.55454	0.998948	27	5.45021	0.920472	27	13.8385	1.00075	17	7.34677	0.945687	27	16.5904	1.06655	27	9.56562	1.05634	17	10.8484	1.06417	27	21.2453	0.969306	27	14.6273	0.960943	17	13.0642	0.930478	27	13.1815	1.05106	27	10.7658
K7EJT5	60S ribosomal protein L22 (Fragment) OS=Homo sapiens GN=RPL22 PE=1 SV=1 - [K7EJT5_HUMAN]	51.06	2	2	27	47	5.07968	9.42236	1.16234	9	6.75506	1.02759	8	7.2938	0.932115	10	6.25145	0.70885	9	4.85974	0.974881	8	2.68896	1.09796	10	4.0066	1.08894	9	5.63281	1.0377	8	9.10139	1.02237	10	5.78425	0.873063	9	7.95859	0.97201	8	3.64015	0.891621	10	7.44475
I3L0Q0	Ubiquitin-conjugating enzyme E2 G1 OS=Homo sapiens GN=UBE2G1 PE=1 SV=1 - [I3L0Q0_HUMAN]	51.02	2	2	3	49	5.53591	4.43701				0.969757	1		1.07874	2	5.82931				0.987914	1		0.890264	2	10.1716				1.00391	1		1.1556	2	1.04722				1.04369	1		0.901314	2	8.44547
X5D7K9	Major vault protein isoform C (Fragment) OS=Homo sapiens GN=MVP PE=2 SV=1 - [X5D7K9_HUMAN]	50.91	33	33	214	827	91.903	5.41455	0.951105	74	7.25781	0.993929	69	7.72501	1.01343	71	8.86191	1.05997	74	11.2483	0.956225	69	6.76461	0.930455	71	8.57583	0.958207	74	7.65266	1.06984	69	7.91853	1.10086	71	13.455	1.07077	74	8.6312	0.991508	69	7.89491	0.9454	71	10.7638
Q15365	Poly(rC)-binding protein 1 OS=Homo sapiens GN=PCBP1 PE=1 SV=2 - [PCBP1_HUMAN]	50.84	8	13	96	356	37.4739	7.09326	1.0274	24	7.34548	1.01571	21	7.33376	0.967608	18	7.19161	1.02703	24	6.54596	0.996846	21	6.79849	1.08041	18	9.24027	1.01492	24	2.68055	1.018	21	8.35193	0.78842	18	24.5122	0.939563	24	8.75374	0.971601	21	7.38083	1.11665	18	11.7082
P51572	B-cell receptor-associated protein 31 OS=Homo sapiens GN=BCAP31 PE=1 SV=3 - [BAP31_HUMAN]	50.81	15	15	78	246	27.974	8.44092	1.00757	21	4.81591	0.996872	26	7.99781	0.943323	31	7.10507	0.955691	21	6.79966	1.01249	26	9.38929	1.03508	31	12.7393	1.05161	21	6.92076	0.987012	26	8.48205	1.07451	31	12.6571	0.96109	21	6.90489	1.00342	26	6.26865	0.92382	31	9.58151
B4DUQ1	cDNA FLJ54552, highly similar to Heterogeneous nuclear ribonucleoprotein K OS=Homo sapiens PE=2 SV=1 - [B4DUQ1_HUMAN]	50.8	19	19	256	439	48.4802	5.92236	1.03922	77	7.82528	1.00541	93	7.16717	0.951462	86	9.88143	0.988493	77	8.30178	1.01289	93	7.31078	1.02949	86	9.86951	0.990966	77	6.59435	0.99904	93	6.7701	0.9386	86	23.6325	0.963244	77	8.00268	0.981358	93	6.66917	1.08536	86	12.2019
Q9UDW1	Cytochrome b-c1 complex subunit 9 OS=Homo sapiens GN=UQCR10 PE=1 SV=3 - [QCR9_HUMAN]	50.79	3	3	8	63	7.30383	9.46631	0.947256	2	3.011	0.954689	3	13.858	0.969099	3	2.31652	0.840542	2	9.14408	0.965626	3	14.4284	1.01352	3	0.0242824	1.15578	2	2.67155	1.15427	3	3.09517	1.13763	3	1.44638	1.01605	2	1.48259	0.935496	3	6.98715	0.860467	3	15.6104
B4DV28	cDNA FLJ54170, highly similar to Cytosolic nonspecific dipeptidase OS=Homo sapiens PE=2 SV=1 - [B4DV28_HUMAN]	50.76	19	19	46	463	51.4693	6.43018	1.01849	18	6.85129	0.98867	16	2.83467	0.91162	12	6.6753	0.974343	18	20.9355	0.988389	16	7.75427	1.05435	12	4.46327	1.02987	18	15.2738	0.996863	16	6.06078	0.981569	12	10.3391	0.958799	18	14.1515	1.02165	16	8.51812	1.01325	12	7.76874
P37108	Signal recognition particle 14 kDa protein OS=Homo sapiens GN=SRP14 PE=1 SV=2 - [SRP14_HUMAN]	50.74	8	8	24	136	14.5608	10.0376	0.952688	6	5.67794	1.0256	9	11.459	0.970258	9	7.78418	1.05381	6	3.93919	1.0466	9	7.22107	0.974702	9	11.8466	1.00124	6	10.8007	1.00312	9	7.27116	1.09458	9	10.897	1.0548	6	14.3245	0.995765	9	9.76393	0.964952	9	11.2048
H3BQ52	cAMP-regulated phosphoprotein 19 OS=Homo sapiens GN=ARPP19 PE=1 SV=1 - [H3BQ52_HUMAN]	50.7	2	3	14	71	7.68185	7.23975	0.98923	4	6.67989	0.902217	1		0.969328	3	1.01209	0.999469	4	8.10236	1.01217	1		0.957549	3	11.5753	1.00053	4	4.41648	0.984713	1		1.10823	3	1.33897	1.00791	4	5.66007	1.1127	1		0.976496	3	1.93932
P61326	Protein mago nashi homolog OS=Homo sapiens GN=MAGOH PE=1 SV=1 - [MGN_HUMAN]	50.68	7	7	19	146	17.1528	6.11279	0.987082	7	9.98081	0.964951	7	5.18784	0.893272	5	5.45566	0.984487	7	8.63355	0.990436	7	9.3271	1.04666	5	14.9558	1.03457	7	4.17013	1.00965	7	12.3904	1.00908	5	8.7346	1.00946	7	11.4468	1.0071	7	10.6398	1.02175	5	16.2443
B4E0X8	cDNA FLJ61021, highly similar to Far upstream element-binding protein 1 OS=Homo sapiens PE=2 SV=1 - [B4E0X8_HUMAN]	50.56	1	26	132	629	66.1908	7.56201	0.977292	3	1.66574	0.996498	4	0.874478	0.913202	1		1.06866	3	1.81364	1.02388	4	4.39857	1.07569	1		0.993909	3	1.43607	0.979521	4	13.9598	1.00223	1		0.982108	3	2.74828	1.02072	4	9.4163	0.978931	1
B3KPX1	cDNA FLJ32394 fis, clone SKMUS2000078, highly similar to Very-long-chain specific acyl-CoA dehydrogenase, mitochondrial OS=Homo sapiens PE=2 SV=1 - [B3KPX1_HUMAN]	50.56	1	14	48	356	38.671	8.41162				1.02341	1								0.919955	1								1.06513	1								0.990056	1
P13639	Elongation factor 2 OS=Homo sapiens GN=EEF2 PE=1 SV=4 - [EF2_HUMAN]	50.47	45	46	658	858	95.277	6.82959	1.03743	231	9.3641	1.02454	217	8.24668	1.00597	199	13.7798	0.941603	230	16.0296	0.988948	217	10.298	1.07358	199	10.9614	1.06763	231	10.8123	1.02488	217	10.5687	0.868909	199	27.758	0.914031	231	15.1246	0.953346	217	9.80966	1.05701	199	12.8231
P04040	Catalase OS=Homo sapiens GN=CAT PE=1 SV=3 - [CATA_HUMAN]	50.47	24	24	99	527	59.7188	7.38623	0.984594	40	5.31024	1.00449	27	6.89529	0.989086	32	6.15068	1.0447	40	7.82503	0.993999	27	7.95026	1.03121	32	8.98963	0.982378	40	7.24919	0.96112	27	12.9426	0.930163	32	20.1433	0.989757	40	9.40241	0.980174	27	7.54689	1.05809	32	10.0536
A0A0D9SFB3	ATP-dependent RNA helicase DDX3X OS=Homo sapiens GN=DDX3X PE=1 SV=1 - [A0A0D9SFB3_HUMAN]	50.47	30	31	158	640	70.7961	7.35693	1.05392	42	8.45721	0.985324	53	7.91787	1.00037	50	10.734	0.911024	42	11.1573	0.963257	53	9.26345	1.02709	50	9.81634	1.07711	42	8.35387	1.05099	53	8.63876	1.00668	50	18.1358	0.902424	42	13.0675	1.01714	53	7.88997	1.00976	50	10.8008
P14550	Alcohol dehydrogenase [NADP(+)] OS=Homo sapiens GN=AKR1A1 PE=1 SV=3 - [AK1A1_HUMAN]	50.46	14	15	57	325	36.5499	6.78564	0.913412	10	4.60794	0.956398	13	9.13675	1.00998	14	5.15762	1.15599	10	10.4139	0.965054	13	5.20637	0.992881	14	6.32923	0.916101	10	5.71124	1.05845	13	6.81687	1.11219	14	11.6426	1.07171	10	9.38645	0.968476	13	8.10828	0.938676	14	4.76046
P62854	40S ribosomal protein S26 OS=Homo sapiens GN=RPS26 PE=1 SV=3 - [RS26_HUMAN]	50.43	5	5	47	115	13.0071	11.0044	1.06573	13	10.7999	1.06457	14	8.76539	0.994605	20	9.52532	0.832375	13	23.9397	0.882591	14	9.19478	0.996463	20	4.17502	1.1614	13	12.1026	1.10536	14	7.72566	1.02475	20	17.6335	0.862154	13	10.8374	0.932203	14	12.1432	0.975883	20	28.874
Q8N5K1	CDGSH iron-sulfur domain-containing protein 2 OS=Homo sapiens GN=CISD2 PE=1 SV=1 - [CISD2_HUMAN]	50.37	6	6	16	135	15.2685	9.61279	0.980576	5	10.0427	0.964101	5	2.81548	0.958528	6	14.9567	1.06572	5	6.5828	1.056	5	9.79768	1.06828	6	5.89673	0.988307	5	6.26391	0.97331	5	2.62425	0.927223	6	8.3445	0.997423	5	11.8551	1.0156	5	2.98749	1.04906	6	8.65736
P49915	GMP synthase [glutamine-hydrolyzing] OS=Homo sapiens GN=GMPS PE=1 SV=1 - [GUAA_HUMAN]	50.36	33	33	158	693	76.667	6.87354	0.995206	71	8.2156	0.962045	44	10.8944	0.97105	43	7.41672	1.00079	71	9.61949	1.02167	44	7.99678	0.999467	43	10.0666	1.02052	71	10.0776	0.984297	44	6.80633	0.951427	43	27.4069	0.975092	71	14.5336	1.01932	44	6.49434	1.01389	43	12.7192
V9HW25	Epididymis secretory protein Li 273 OS=Homo sapiens GN=HEL-S-273 PE=2 SV=1 - [V9HW25_HUMAN]	50.35	6	17	75	284	32.9696	4.66553	1.08111	5	6.69567	0.971844	3	1.30109	0.940306	6	6.14788	0.998508	5	18.0276	1.11759	3	2.42461	1.0226	6	12.8073	0.968152	5	6.06723	0.930399	3	1.47422	1.11476	6	7.02777	0.963966	5	14.6794	0.982918	3	0.639696	0.937714	6	2.23474
A0A087WTP3	Far upstream element-binding protein 2 OS=Homo sapiens GN=KHSRP PE=1 SV=1 - [A0A087WTP3_HUMAN]	50.35	25	29	194	711	72.9823	7.7085	1.00569	64	9.72239	0.973337	57	7.35248	1.00162	53	10.3745	1.01418	64	10.2302	1.06342	57	6.59502	0.984968	53	9.60246	0.989906	64	8.1374	0.983626	57	7.70785	1.0216	53	19.0593	0.995889	64	12.5813	0.994263	57	5.93802	1.00434	53	9.77171
B4DZ87	cDNA FLJ57240, highly similar to Mitochondrial proteins import receptor OS=Homo sapiens PE=2 SV=1 - [B4DZ87_HUMAN]	50.3	24	24	71	501	56.8945	5.90967	1.02	22	7.75889	1.00666	24	10.7223	0.919525	25	15.9014	0.995186	22	9.68849	1.02457	24	7.38156	1.06169	25	9.64933	1.01528	22	7.1899	0.947133	24	6.75023	0.966762	25	13.1986	1.01867	22	13.5194	0.998064	24	10.8472	1.0279	25	9.14914
B4DNR3	cDNA FLJ52710, highly similar to Abhydrolase domain-containing protein 14B OS=Homo sapiens PE=2 SV=1 - [B4DNR3_HUMAN]	50.27	7	7	30	185	19.7842	6.40479	1.01055	10	17.0718	1.00171	11	8.87044	0.98865	9	13.638	1.01409	10	25.4016	1.05336	10	12.3694	1.06053	9	7.71525	1.04035	10	6.27647	1.01878	11	10.4962	0.836065	9	13.4973	1.02841	10	11.8574	0.959654	11	9.79478	1.04111	9	12.5112
Q99497	Protein deglycase DJ-1 OS=Homo sapiens GN=PARK7 PE=1 SV=2 - [PARK7_HUMAN]	50.26	10	10	76	189	19.8785	6.78564	0.965779	21	6.61497	0.960271	26	4.9017	0.938279	29	12.5855	1.0603	21	12.3699	1.04109	26	8.71791	1.00431	29	8.03365	0.980572	21	6.432	1.02262	26	11.1284	0.992979	29	7.3318	0.989197	21	8.99903	1.00961	26	7.26287	1.05365	29	13.3829
P35221	Catenin alpha-1 OS=Homo sapiens GN=CTNNA1 PE=1 SV=1 - [CTNA1_HUMAN]	50.22	30	42	203	906	100.009	6.29053	1.06004	47	6.31044	1.04171	54	6.88594	1.0011	44	8.016	0.920717	47	10.3754	0.951433	54	6.59777	1.03255	44	10.3968	1.07725	47	7.55982	1.01911	54	6.43017	1.02097	44	15.7891	0.885644	47	8.0429	0.962527	54	5.90228	0.990287	44	9.22467
P30040	Endoplasmic reticulum resident protein 29 OS=Homo sapiens GN=ERP29 PE=1 SV=4 - [ERP29_HUMAN]	50.19	12	12	68	261	28.9752	7.31299	1.01143	23	11.7665	0.992616	22	7.27773	0.904729	23	9.08401	0.997159	23	10.3899	1.04818	22	4.66873	1.03414	23	5.88543	1.02869	23	8.67945	0.957813	22	6.45797	1.01946	23	8.84591	0.999923	23	17.1267	1.01327	22	7.06987	1.01695	23	6.29712
B4E022	cDNA FLJ56274, highly similar to Transketolase (EC 2.2.1.1) OS=Homo sapiens PE=2 SV=1 - [B4E022_HUMAN]	50.17	26	26	299	576	62.8393	7.51807	0.949308	100	7.51878	0.943651	107	6.93823	0.992796	92	11.9667	1.04332	100	11.1249	0.969735	107	7.07687	0.914833	92	11.5286	0.969595	100	10.5261	1.09821	107	6.65583	1.16856	92	15.3157	1.06363	100	10.1103	1.00514	107	6.49987	0.928411	92	12.239
O75369	Filamin-B OS=Homo sapiens GN=FLNB PE=1 SV=2 - [FLNB_HUMAN]	50.15	99	106	545	2602	277.99	5.73193	0.982515	177	8.26994	0.993674	167	6.80082	1.01434	160	9.49831	0.97568	177	9.20173	0.934041	167	6.59861	0.96682	160	8.67687	1.01757	177	8.92363	1.05314	167	7.05543	1.08167	160	14.6599	1.00481	177	8.97112	1.00745	167	6.44795	0.9389	160	12.6973
Q15019	Septin-2 OS=Homo sapiens GN=SEPT2 PE=1 SV=1 - [SEPT2_HUMAN]	50.14	15	15	69	361	41.4613	6.59521	1.00037	23	6.5016	0.979909	24	8.33079	1.00196	21	9.97066	0.932297	23	9.88683	1.00164	24	6.88808	0.974911	21	10.7193	1.03278	23	9.12279	1.05045	24	8.69245	1.07075	21	16.6145	0.999305	23	10.3928	0.976472	24	5.87661	0.987861	21	9.25031
A5PLK7	RCC2 protein (Fragment) OS=Homo sapiens GN=RCC2 PE=2 SV=1 - [A5PLK7_HUMAN]	50.11	20	20	87	457	49.6471	8.68994	1.04566	37	6.2009	0.975173	26	4.11519	0.911301	24	15.078	0.953997	37	8.48938	1.04817	26	5.30987	1.06394	24	8.24176	1.04902	37	10.877	0.974789	26	7.51485	0.935652	24	7.3009	0.911059	37	16.7047	0.976124	26	5.94035	1.01415	24	7.75239
P04843	Dolichyl-diphosphooligosaccharide--protein glycosyltransferase subunit 1 OS=Homo sapiens GN=RPN1 PE=1 SV=1 - [RPN1_HUMAN]	50.08	30	30	240	607	68.5268	6.37939	0.975583	91	7.98427	1.03728	74	8.15484	1.01312	75	7.25668	1.0547	91	11.2942	1.00851	74	8.51983	0.997112	75	7.85335	0.97852	91	5.32698	0.998399	74	9.44358	0.938943	75	20.4869	1.0059	91	9.44562	0.967148	74	9.7733	1.06373	75	14.9506
P16401	Histone H1.5 OS=Homo sapiens GN=HIST1H1B PE=1 SV=3 - [H15_HUMAN]	50	12	16	180	226	22.5665	10.9165	1.06293	41	10.5122	1.05018	37	8.83835	0.975504	39	17.3208	0.905558	41	9.27842	0.964079	37	12.3949	0.999727	39	10.6153	1.0825	41	9.7372	1.00899	37	15.1523	0.95721	39	10.4257	0.88164	41	9.14726	0.962454	37	7.75676	1.08559	39	7.51513
P31947	14-3-3 protein sigma OS=Homo sapiens GN=SFN PE=1 SV=1 - [1433S_HUMAN]	50	10	14	173	248	27.7567	4.7417	0.990641	18	8.06372	0.809555	9	6.7681	0.859249	10	12.6699	1.04558	18	10.2411	1.08258	9	8.71191	0.997507	10	6.39898	0.931324	18	6.0271	1.04832	9	6.29186	1.17919	10	2.74164	1.07095	18	9.02992	1.07133	9	5.25331	0.983215	10	4.57176
O95167	NADH dehydrogenase [ubiquinone] 1 alpha subcomplex subunit 3 OS=Homo sapiens GN=NDUFA3 PE=1 SV=1 - [NDUA3_HUMAN]	50	3	3	5	84	9.27285	8.45557	1.01246	1		1.02585	2	5.7081	0.981459	2	8.79297	1.15311	1		1.01204	2	0.331797	0.974409	2	3.89901	0.871838	1		0.937044	2	0.683636	1.01667	2	1.72432	1.04054	1		1.02333	2	5.90231	1.0335	2	1.05667
F5GX77	Multifunctional methyltransferase subunit TRM112-like protein OS=Homo sapiens GN=TRMT112 PE=1 SV=1 - [F5GX77_HUMAN]	50	4	4	17	106	11.9643	8.07471	1.04137	7	2.82771	1.07825	5	0.791998	1.0157	5	1.7676	0.857972	7	4.81355	0.855811	5	8.89491	1.00845	5	8.49218	1.04724	7	6.2299	1.05065	5	3.97711	0.815363	5	12.9628	1.02335	7	16.5468	0.993438	5	8.07557	1.08929	5	8.80944
O60547	GDP-mannose 4,6 dehydratase OS=Homo sapiens GN=GMDS PE=1 SV=1 - [GMDS_HUMAN]	50	18	18	54	372	41.9233	7.31299	1.02495	18	7.51665	1.02558	17	5.85817	0.928681	19	6.73609	0.94714	18	7.31228	0.928889	17	12.2634	1.04241	19	5.91142	1.04143	18	4.59586	1.00569	17	3.52708	1.05618	19	10.8956	0.973029	18	13.561	1.0103	17	4.83983	0.973238	19	7.69837
L8E918	Alternative protein IKBKAP OS=Homo sapiens GN=IKBKAP PE=4 SV=1 - [L8E918_HUMAN]	50	1	1	1	58	6.63048	8.20654				1.00151	1								1.12517	1								0.997573	1								0.886773	1
F8W1G3	Bax inhibitor 1 (Fragment) OS=Homo sapiens GN=TMBIM6 PE=1 SV=1 - [F8W1G3_HUMAN]	50	1	1	1	16	1.98406	8.83643				0.914538	1								0.9173	1								1.0818	1								1.09438	1
P49588	Alanine--tRNA ligase, cytoplasmic OS=Homo sapiens GN=AARS PE=1 SV=2 - [SYAC_HUMAN]	49.9	39	39	190	968	106.743	5.52881	0.987484	64	8.96715	1.03422	61	7.64607	0.927741	65	10.6666	0.988697	64	11.7279	0.973242	61	5.74668	1.08142	65	7.05873	1.05667	64	9.67805	1.04125	61	6.75161	0.931308	65	13.3534	0.946339	64	11.7211	0.952612	61	5.98541	1.03133	65	7.28365
P37837	Transaldolase OS=Homo sapiens GN=TALDO1 PE=1 SV=2 - [TALDO_HUMAN]	49.85	20	20	117	337	37.5165	6.81494	0.956695	50	11.3239	0.953531	34	9.54795	0.972162	33	11.1395	1.07503	50	11.2322	1.01481	34	6.90555	1.02198	33	6.2481	0.993048	50	11.318	1.01726	34	7.22133	1.05792	33	13.6798	1.04522	50	10.2531	1.01378	34	4.94555	0.961763	33	9.86124
Q9Y617	Phosphoserine aminotransferase OS=Homo sapiens GN=PSAT1 PE=1 SV=2 - [SERC_HUMAN]	49.73	18	18	101	370	40.3968	7.66455	1.08172	43	10.4174	1.00142	29	4.78007	0.832214	29	16.8268	0.902968	43	12.5743	0.994532	29	2.74939	1.178	29	10.5277	1.04934	43	11.3026	1.01632	29	5.98068	0.70648	29	21.3847	0.909956	43	19.6303	0.98867	29	5.90435	1.16577	29	13.5843
Q13185	Chromobox protein homolog 3 OS=Homo sapiens GN=CBX3 PE=1 SV=4 - [CBX3_HUMAN]	49.73	7	9	48	183	20.7984	5.32568	1.08987	10	6.96646	1.0138	10	4.34369	0.956218	10	5.87033	0.901347	10	9.79026	1.02559	10	8.76238	0.982809	10	9.98021	1.12173	10	8.39459	1.09095	10	4.39824	1.0528	10	5.63691	0.781286	10	13.969	0.936406	10	7.42466	1.00436	10	14.4953
B7Z2S5	cDNA FLJ56075, highly similar to Thioredoxin reductase 1, cytoplasmic (EC 1.8.1.9) OS=Homo sapiens PE=2 SV=1 - [B7Z2S5_HUMAN]	49.73	22	23	126	547	59.9838	6.68311	0.897502	40	9.94758	0.856264	42	10.0772	0.951477	37	14.3831	1.09744	40	16.4811	0.952368	42	7.16213	0.988738	37	10.8238	0.939078	40	11.7518	1.09519	42	11.0224	1.08711	37	23.1601	1.17979	40	12.5412	1.13176	42	8.21947	0.985546	37	15.1723
A0A024QZN4	Vinculin, isoform CRA_c OS=Homo sapiens GN=VCL PE=4 SV=1 - [A0A024QZN4_HUMAN]	49.72	54	54	174	1066	116.649	6.0874	0.993924	59	11.5845	0.96788	55	8.01222	0.971728	59	11.6303	0.964067	59	11.634	1.01393	55	6.82729	1.02556	59	9.64484	1.0287	59	7.5498	0.999958	55	6.51201	1.00612	59	12.1739	0.986919	59	10.7048	1.03929	55	8.39583	0.980087	59	9.56955
O15212	Prefoldin subunit 6 OS=Homo sapiens GN=PFDN6 PE=1 SV=1 - [PFD6_HUMAN]	49.61	8	8	28	129	14.5738	8.88037	0.978315	9	7.58831	1.01885	8	2.95077	1.02899	11	7.49778	1.09762	9	5.39817	1.01704	8	3.28765	1.01199	11	9.15055	0.903791	9	6.19835	0.984154	8	3.97467	0.9669	11	13.3506	1.11271	9	4.07538	0.976979	8	4.26136	1.03513	11	9.71801
B4E3A8	cDNA FLJ53963, highly similar to Leukocyte elastase inhibitor OS=Homo sapiens PE=2 SV=1 - [B4E3A8_HUMAN]	49.56	16	16	99	341	38.6607	6.66846	1.04178	35	5.31521	0.984732	30	6.04279	0.866649	34	9.65242	0.938843	35	8.73538	1.03025	30	4.21913	1.114	34	7.97918	1.04015	35	9.41965	1.00488	30	6.24624	0.880268	34	9.90838	0.947933	35	11.7652	0.987169	30	4.83306	1.07752	34	10.3632
Q9BU08	Putative uncharacterized protein (Fragment) OS=Homo sapiens PE=2 SV=1 - [Q9BU08_HUMAN]	49.54	30	31	194	539	59.4307	5.65576	1.03116	74	6.15099	0.98956	60	7.13008	0.955805	54	12.6735	0.96115	74	12.6024	0.98146	60	8.87226	1.04436	54	7.76826	1.0289	74	8.23312	1.0484	60	7.58443	1.00993	54	18.1458	0.935339	74	11.4306	1.00394	60	8.51516	0.997601	54	10.0575
Q96AE4	Far upstream element-binding protein 1 OS=Homo sapiens GN=FUBP1 PE=1 SV=3 - [FUBP1_HUMAN]	49.53	1	26	128	644	67.5185	7.60596	0.907201	2	15.8112				0.9224	2	0.363354	0.927362	2	2.53007				0.98024	2	1.3543	1.13185	2	12.3132				1.09082	2	12.5357	1.01787	2	1.0869				0.994872	2	12.8323
P31949	Protein S100-A11 OS=Homo sapiens GN=S100A11 PE=1 SV=2 - [S10AB_HUMAN]	49.52	5	5	146	105	11.7328	7.12256	0.901668	34	9.69158	0.988356	60	7.02512	1.12708	52	12.8784	1.17395	34	11.29	0.961266	60	8.28658	0.982307	52	21.5969	0.931168	34	10.4509	1.02012	60	7.96499	0.893019	52	38.8726	1.12389	34	15.1875	1.00202	60	7.69429	1.01498	52	11.8219
P67775	Serine/threonine-protein phosphatase 2A catalytic subunit alpha isoform OS=Homo sapiens GN=PPP2CA PE=1 SV=1 - [PP2AA_HUMAN]	49.51	10	11	40	309	35.5714	5.5415	0.974832	15	7.10929	0.95817	8	6.20769	0.945269	10	5.12788	0.987577	15	11.7904	1.00125	8	4.37002	1.01221	10	3.518	1.01416	15	9.53226	1.0108	8	5.63617	1.02262	10	16.2252	0.969212	15	8.79263	1.00714	8	2.25412	1.02505	10	7.1767
P20700	Lamin-B1 OS=Homo sapiens GN=LMNB1 PE=1 SV=2 - [LMNB1_HUMAN]	49.49	26	30	188	586	66.3676	5.16064	1.04543	72	8.32005	1.02196	53	6.80714	0.953306	52	9.7246	0.908641	72	7.92452	1.04569	53	7.28269	1.04572	52	8.47322	1.06349	72	6.6216	0.958177	53	6.85044	0.977461	52	10.5526	0.93667	72	16.3574	0.97396	53	5.98424	1.00695	52	7.3645
O43678	NADH dehydrogenase [ubiquinone] 1 alpha subcomplex subunit 2 OS=Homo sapiens GN=NDUFA2 PE=1 SV=3 - [NDUA2_HUMAN]	49.49	5	5	9	99	10.9148	9.56885	0.931306	4	19.5131	0.879105	2	7.14859	0.882752	3	0.921981	1.08536	4	10.5637	1.12407	2	7.93392	1.09598	3	9.01027	0.923465	4	10.0298	1.08255	2	14.0084	0.944194	3	30.9994	1.10059	4	22.1755	0.926825	2	14.1508	1.04856	3	4.1216
Q9Y678	Coatomer subunit gamma-1 OS=Homo sapiens GN=COPG1 PE=1 SV=1 - [COPG1_HUMAN]	49.43	32	36	156	874	97.6555	5.46533	0.969215	50	7.59758	0.957383	49	6.30123	0.967753	42	8.92087	1.04227	50	8.32411	1.02196	49	8.55264	0.998678	42	9.93541	0.996697	50	7.52739	1.0333	49	7.45466	0.982947	42	18.8484	1.01794	50	12.2644	0.990818	49	8.1373	1.01163	42	15.7537
Q8WVC2	40S ribosomal protein S21 OS=Homo sapiens GN=RPS21 PE=1 SV=1 - [Q8WVC2_HUMAN]	49.38	4	4	20	81	8.84446	8.49951	1.1835	5	8.78973	1.01414	9	8.62036	0.990916	6	13.199	0.738676	5	6.23253	0.89401	9	10.9369	0.939528	6	4.66675	1.17777	5	10.5146	1.08361	9	5.77069	1.15246	6	11.3667	0.746997	5	3.48718	1.02041	9	6.74994	0.907985	6	8.99551
D6RB85	Calnexin (Fragment) OS=Homo sapiens GN=CANX PE=1 SV=1 - [D6RB85_HUMAN]	49.31	1	9	78	144	15.998	4.7417	0.845548	2	7.61236	1.00536	3	5.03476	1.03865	3	1.83089	1.23783	2	2.31598	1.0344	3	5.14044	1.16767	3	0.0294595	0.933965	2	5.82164	0.991636	3	3.90008	0.511841	3	24.1885	1.1141	2	3.80311	0.973422	3	1.6242	1.28162	3	16.4129
Q9HAV7	GrpE protein homolog 1, mitochondrial OS=Homo sapiens GN=GRPEL1 PE=1 SV=2 - [GRPE1_HUMAN]	49.31	10	10	36	217	24.2639	8.11865	1.01647	14	9.20912	0.998272	8	5.99601	0.933635	14	8.42774	0.931383	14	7.19974	1.00827	8	4.83574	1.07238	14	3.86562	1.07583	14	8.00208	1.01859	8	5.37304	0.906478	14	13.4348	0.918059	14	6.4603	0.946168	8	6.1115	1.03356	14	7.64289
P13804	Electron transfer flavoprotein subunit alpha, mitochondrial OS=Homo sapiens GN=ETFA PE=1 SV=1 - [ETFA_HUMAN]	49.25	14	14	109	333	35.0576	8.38232	0.895643	34	9.12539	1.00084	39	8.61499	1.0665	35	12.0365	1.16263	34	8.07397	1.00281	39	8.55939	0.980347	35	9.28758	0.916681	34	7.98586	1.00314	39	6.50451	1.05736	35	15	1.12207	34	9.38046	1.01283	39	6.68614	0.948803	35	16.4004
A8K7W3	cDNA FLJ75780, highly similar to Homo sapiens SGT1, suppressor of G2 allele of SKP1 (SUGT1), mRNA OS=Homo sapiens PE=2 SV=1 - [A8K7W3_HUMAN]	49.25	1	14	60	333	37.8099	5.14795	0.834192	1								1.10055	1								0.929469	1								1.26493	1
B4DY09	Interleukin enhancer-binding factor 2 OS=Homo sapiens GN=ILF2 PE=1 SV=1 - [B4DY09_HUMAN]	49.15	13	13	85	352	38.8862	4.94482	1.02104	29	4.95838	1.02095	29	7.61739	0.994573	27	10.3904	1.01758	29	9.13449	0.989705	29	7.15648	1.09267	27	5.35491	1.02994	29	6.39628	1.03952	29	9.04012	0.780973	27	24.0952	0.920869	29	7.0453	0.930815	29	6.3183	1.1337	27	10.9252
O94760	N(G),N(G)-dimethylarginine dimethylaminohydrolase 1 OS=Homo sapiens GN=DDAH1 PE=1 SV=3 - [DDAH1_HUMAN]	49.12	10	11	42	285	31.1019	5.80811	0.987019	14	3.17602	0.989969	14	3.14691	1.00494	12	5.36389	1.06077	14	9.81109	1.01055	14	10.2438	0.990261	12	5.44577	0.941532	14	5.80894	0.999602	14	5.32703	1.04352	12	13.3553	1.04578	14	7.64371	1.01382	14	8.60978	0.963609	12	5.38081
B4DT77	Annexin OS=Homo sapiens PE=2 SV=1 - [B4DT77_HUMAN]	49.11	15	15	66	336	37.7809	7.18115	1.02704	25	10.1323	0.949883	19	3.6589	0.940641	22	7.91137	0.906501	25	8.32957	1.02914	19	5.13139	1.01777	22	10.6933	0.986934	25	7.59081	1.00401	19	5.62977	1.00855	22	15.1134	1.00819	25	13.3969	1.01977	19	5.93451	1.04443	22	10.8117
P35579	Myosin-9 OS=Homo sapiens GN=MYH9 PE=1 SV=4 - [MYH9_HUMAN]	49.08	78	95	411	1960	226.392	5.60498	1.0178	114	7.18372	1.00459	97	6.29191	0.963967	101	10.4175	0.969607	114	14.0579	0.992116	97	7.91494	1.02002	101	9.34029	1.03164	114	10.1139	1.02266	97	8.0321	1.02803	101	11.9717	0.979184	114	12.7905	0.981198	97	7.68416	0.981356	101	10.1463
Q9Y295	Developmentally-regulated GTP-binding protein 1 OS=Homo sapiens GN=DRG1 PE=1 SV=1 - [DRG1_HUMAN]	49.05	15	16	59	367	40.5168	8.89502	1.0134	18	6.41155	0.965925	20	8.25987	0.988379	18	10.5709	1.00446	18	4.70786	0.979863	20	6.49714	1.01051	18	5.99239	1.01431	18	7.59626	1.00762	20	4.75861	0.974051	18	23.9779	0.948007	18	7.67847	1.03804	20	9.76874	1.03522	18	13.2545
B2RDW0	cDNA, FLJ96792, highly similar to Homo sapiens calmodulin 2 (phosphorylase kinase, delta) (CALM2), mRNA OS=Homo sapiens PE=2 SV=1 - [B2RDW0_HUMAN]	48.99	9	9	72	149	16.7668	4.22119	1.08484	23	11.2121	1.00394	24	7.47352	0.951997	25	11.6836	0.994036	23	16.7045	0.987685	24	7.02218	1.06437	25	9.75836	0.981104	23	6.59221	1.05289	24	12.4175	0.916627	25	21.1518	0.90218	23	12.7104	0.940016	24	11.1904	1.03061	25	11.9641
B7Z532	cDNA FLJ51028, highly similar to 60 kDa heat shock protein, mitochondrial OS=Homo sapiens PE=2 SV=1 - [B7Z532_HUMAN]	48.98	1	11	155	245	26.6692	5.22412	0.972692	3	1.49977	0.993399	3	1.86257	1.04196	2	2.70933	1.1019	3	10.6442	1.06062	3	2.73606	1.08642	2	4.91828	0.853505	3	9.63205	0.95972	3	2.18222	0.881661	2	1.12788	1.12663	3	9.74037	1.00611	3	7.15607	0.972853	2	3.57022
P00568	Adenylate kinase isoenzyme 1 OS=Homo sapiens GN=AK1 PE=1 SV=3 - [KAD1_HUMAN]	48.97	10	10	24	194	21.6213	8.63135	0.905867	9	7.62567	0.915204	5	3.92833	0.96196	10	9.37864	1.11358	9	16.3396	1.04276	5	6.02834	1.01123	10	5.2741	0.992289	9	7.69564	1.01011	5	3.94158	1.03284	10	14.0318	1.05182	9	9.35144	1.058	5	4.99792	1.0008	10	5.92968
B2R983	cDNA, FLJ94267, highly similar to Homo sapiens glutathione S-transferase omega 1 (GSTO1), mRNA OS=Homo sapiens PE=2 SV=1 - [B2R983_HUMAN]	48.96	15	15	86	241	27.521	6.59521	0.968517	36	6.35074	0.953477	25	7.86433	1.03898	25	10.609	1.04256	36	7.98145	1.02141	25	7.10352	1.0277	25	9.87431	1.00104	36	6.08619	1.02354	25	6.7372	1.02872	25	22.3238	1.03626	36	9.87595	1.01576	25	8.06024	1.01373	25	12.984
P36578	60S ribosomal protein L4 OS=Homo sapiens GN=RPL4 PE=1 SV=5 - [RL4_HUMAN]	48.95	20	21	167	427	47.6674	11.063	1.03277	64	11.9044	1.12028	50	8.74719	0.976347	52	12.7376	0.909607	64	18.8523	0.872412	50	8.20988	1.03076	52	10.8126	1.1249	64	8.74104	1.13325	50	9.10529	0.923811	52	23.8816	0.830796	64	17.9863	0.855773	50	14.7688	1.04945	52	24.4749
A0A0B4J1Z1	Serine/arginine-rich-splicing factor 7 OS=Homo sapiens GN=SRSF7 PE=1 SV=1 - [A0A0B4J1Z1_HUMAN]	48.91	7	8	33	137	15.7528	9.80322	1.06522	7	2.78882	0.966172	10	8.08605	1.01635	7	5.86209	0.940349	7	14.2957	1.05387	10	4.14083	1.0886	7	7.98095	1.03512	7	3.01683	0.967364	10	5.81708	0.947598	7	19.3326	0.940345	7	2.96959	1.03835	10	5.36669	1.08765	7	7.6268
B3KML9	cDNA FLJ11352 fis, clone HEMBA1000020, highly similar to Tubulin beta-2C chain OS=Homo sapiens PE=2 SV=1 - [B3KML9_HUMAN]	48.87	2	17	416	397	44.5735	4.93213	0.957309	11	10.1845	0.884105	8	16.9498	0.978002	8	17.9446	1.01284	11	10.6188	0.987448	8	16.6125	0.917968	8	6.14224	1.00689	11	7.17045	1.01591	8	11.7352	1.16355	8	8.02211	1.02188	11	13.8856	1.05035	8	10.3727	0.927082	8	6.10699
P62191	26S protease regulatory subunit 4 OS=Homo sapiens GN=PSMC1 PE=1 SV=1 - [PRS4_HUMAN]	48.86	19	20	89	440	49.1537	6.21436	1.01783	30	7.0181	0.954985	29	6.39285	0.96266	25	8.06107	0.913319	30	13.0686	1.02109	29	5.97012	1.0442	25	9.3895	1.04771	30	9.25954	1.04408	29	4.56164	0.99289	25	13.5198	0.957567	30	15.2643	0.995696	29	6.17562	0.977559	25	7.2014
P31153	S-adenosylmethionine synthase isoform type-2 OS=Homo sapiens GN=MAT2A PE=1 SV=1 - [METK2_HUMAN]	48.86	17	17	113	395	43.6333	6.48096	1.0613	44	10.509	1.04858	33	10.4785	0.985971	36	8.25468	0.932625	44	11.6645	1.02592	33	8.70781	1.03399	36	7.81432	1.03138	44	9.37153	0.988892	33	6.7667	0.929854	36	13.0494	0.917782	44	13.7521	0.93168	33	7.56505	1.03644	36	5.51587
Q9Y3F4	Serine-threonine kinase receptor-associated protein OS=Homo sapiens GN=STRAP PE=1 SV=1 - [STRAP_HUMAN]	48.86	14	14	64	350	38.414	5.12256	0.989841	23	9.08019	0.973908	20	7.35175	0.941379	21	15.928	0.968931	23	8.07109	1.0317	20	8.51944	0.963971	21	9.22209	0.997331	23	8.36939	0.997426	20	4.93557	0.971991	21	15.7807	0.98872	23	11.9641	1.02043	20	7.35367	0.996922	21	11.5748
Q92841	Probable ATP-dependent RNA helicase DDX17 OS=Homo sapiens GN=DDX17 PE=1 SV=2 - [DDX17_HUMAN]	48.83	24	32	159	729	80.222	8.26514	0.976515	36	6.40381	1.03033	29	5.24544	1.00219	30	8.66983	1.03729	36	8.68382	0.993802	29	6.66364	0.980701	30	9.06692	0.984231	36	7.21402	1.00669	29	5.88842	1.00241	30	14.4715	1.01552	36	11.028	0.972142	29	3.93859	1.00535	30	9.21456
P50454	Serpin H1 OS=Homo sapiens GN=SERPINH1 PE=1 SV=2 - [SERPH_HUMAN]	48.8	18	18	126	418	46.4112	8.68994	0.912428	47	9.97174	1.01453	43	9.6901	1.19329	36	8.47083	1.13803	47	12.236	1.01001	43	10.4872	0.887485	36	10.6456	0.928246	47	6.79304	0.982495	43	14.3944	1.08831	36	13.4284	1.09962	47	12.2654	0.992054	43	8.4217	0.89186	36	10.8543
P40429	60S ribosomal protein L13a OS=Homo sapiens GN=RPL13A PE=1 SV=2 - [RL13A_HUMAN]	48.77	12	12	56	203	23.5624	10.9312	1.07884	20	10.3951	1.06726	19	4.38642	1.00728	17	6.60186	0.859008	20	13.0918	0.904834	19	5.62488	1.00575	17	8.00545	1.08381	20	11.4338	1.09242	19	7.54421	1.0798	17	4.62102	0.851221	20	17.0968	0.939278	19	7.3808	0.902378	17	3.96624
A0A024RDQ0	Heat shock 105kDa/110kDa protein 1, isoform CRA_a OS=Homo sapiens GN=HSPH1 PE=3 SV=1 - [A0A024RDQ0_HUMAN]	48.65	32	36	206	814	92.0574	5.5542	0.94166	59	7.93557	0.976847	57	9.06887	1.03954	55	8.53462	1.0605	59	10.9763	0.98772	57	8.50423	0.958687	55	10.244	0.980037	59	9.68987	1.0389	57	7.45275	1.12769	55	19.7008	1.07005	59	11.2416	1.00589	57	7.78732	0.900665	55	13.2587
P20042	Eukaryotic translation initiation factor 2 subunit 2 OS=Homo sapiens GN=EIF2S2 PE=1 SV=2 - [IF2B_HUMAN]	48.65	15	15	62	333	38.3644	5.79541	1.0253	26	5.02311	0.937792	17	6.6742	0.913414	19	10.7877	0.967809	26	16.3065	1.06191	17	7.34174	1.06419	19	8.15343	1.04094	26	7.85602	0.957802	17	5.04952	0.982638	19	14.927	0.960925	26	8.81768	1.0143	17	7.51679	1.00895	19	6.81746
P31350	Ribonucleoside-diphosphate reductase subunit M2 OS=Homo sapiens GN=RRM2 PE=1 SV=1 - [RIR2_HUMAN]	48.59	13	16	53	389	44.8488	5.37646	1.04573	23	6.62685	1.00201	14	7.68363	1.16329	12	15.9308	0.955241	23	12.2724	1.04583	14	7.19701	0.844949	12	15.9526	1.06173	23	9.18001	1.04684	14	4.74189	1.19145	12	16.0346	0.865488	23	17.0192	0.913534	14	6.77502	0.821165	12	12.8324
P61981	14-3-3 protein gamma OS=Homo sapiens GN=YWHAG PE=1 SV=2 - [1433G_HUMAN]	48.58	7	12	220	247	28.2849	4.89404	0.937511	16	13.7354	0.914939	23	10.5205	0.902834	24	8.55461	0.970225	16	11.2723	1.01802	23	6.83161	1.02572	24	9.37825	1.01983	16	5.11655	1.06911	23	11.1489	1.0409	24	14.5637	1.04628	16	8.46257	1.00955	23	10.2242	0.98004	24	16.7326
A0A096WXL7	ATP synthase protein 8 OS=Homo sapiens GN=ATP8 PE=3 SV=1 - [A0A096WXL7_HUMAN]	48.53	1	3	8	68	7.99911	9.90576				0.960782	1								0.820948	1								1.17549	1								1.04398	1
Q4W4Y1	Dopamine receptor interacting protein 4 OS=Homo sapiens GN=DRIP4 PE=2 SV=1 - [Q4W4Y1_HUMAN]	48.5	13	40	125	868	96.0192	6.52197	0.978757	15	11.0132	0.992254	9	12.1912	0.94977	9	9.0772	0.972609	15	13.0482	0.980492	9	9.44872	1.00888	9	3.09065	1.01255	15	8.54286	1.04117	9	6.8913	0.997179	9	12.4617	0.967718	15	8.53832	1.02109	9	1.96005	1.06263	9	10.2056
K4ENJ5	Beta actin (Fragment) OS=Homo sapiens PE=4 SV=1 - [K4ENJ5_HUMAN]	48.45	1	3	221	97	11.0145	4.99561				1.02675	2	6.61304							0.820672	2	32.2739							1.10262	2	16.3967							1.01828	2	0.353688
Q9Y277	Voltage-dependent anion-selective channel protein 3 OS=Homo sapiens GN=VDAC3 PE=1 SV=1 - [VDAC3_HUMAN]	48.41	9	10	141	283	30.6393	8.66064	1.00272	19	4.76927	0.966596	17	15.454	1.04755	17	6.91373	1.01801	19	12.94	1.00984	17	13.094	1.10216	17	13.6382	0.970792	19	7.79896	1.0012	17	8.3166	0.976698	17	15.9794	1.04463	19	5.53454	1.01295	17	14.3121	0.947485	17	10.8607
Q02543	60S ribosomal protein L18a OS=Homo sapiens GN=RPL18A PE=1 SV=2 - [RL18A_HUMAN]	48.3	9	9	66	176	20.7489	10.7114	1.10775	23	9.42845	1.07019	22	7.46056	0.981861	21	5.63519	0.806967	23	14.3278	0.888433	22	7.54231	0.983095	21	8.25797	1.11877	23	11.6496	1.09562	22	6.56647	1.09273	21	8.743	0.816495	23	11.3584	0.914251	22	16.5741	0.963385	21	13.4414
P68366	Tubulin alpha-4A chain OS=Homo sapiens GN=TUBA4A PE=1 SV=1 - [TBA4A_HUMAN]	48.21	6	18	524	448	49.8924	5.05908	0.90705	34	16.2798	1.01081	40	6.00405	1.10169	39	7.05204	1.07262	34	13.9188	1.04608	40	9.05544	1.0598	39	7.21764	0.999833	34	8.7351	0.968866	40	7.26844	0.793735	39	12.2828	1.01922	34	14.0653	0.970168	40	6.42185	1.04693	39	8.32594
P07195	L-lactate dehydrogenase B chain OS=Homo sapiens GN=LDHB PE=1 SV=2 - [LDHB_HUMAN]	48.2	14	15	262	334	36.6151	6.04932	0.972204	72	9.07867	1.00169	92	13.3377	0.982416	81	17.9027	1.01757	72	8.9598	0.997136	92	9.83504	1.02238	81	12.2949	1.01862	72	7.97784	1.0512	92	12.3554	0.901278	81	24.2364	0.993995	72	13.5997	0.967203	92	13.2401	1.06738	81	11.8815
A0A024R394	Cysteine and histidine-rich domain (CHORD)-containing 1, isoform CRA_c OS=Homo sapiens GN=CHORDC1 PE=4 SV=1 - [A0A024R394_HUMAN]	48.19	15	15	92	332	37.5096	7.72314	0.965673	35	6.25087	0.955062	29	11.8379	1.01477	28	8.96829	1.02959	35	7.83904	1.00886	29	8.53503	1.00582	28	10.5236	1.02089	35	6.12722	1.05042	29	6.8801	1.00287	28	26.072	1.02096	35	9.96877	0.953419	29	9.12307	0.942325	28	20.2682
Q7RTV0	PHD finger-like domain-containing protein 5A OS=Homo sapiens GN=PHF5A PE=1 SV=1 - [PHF5A_HUMAN]	48.18	6	6	19	110	12.397	8.41162	1.00661	6	4.62245	0.971187	6	3.38863	0.902286	7	3.91415	1.04317	6	9.70165	1.08824	6	8.14677	1.03374	7	7.5844	1.03764	6	5.38727	0.95304	6	15.2323	0.981226	7	8.62134	0.950705	6	4.95172	0.989536	6	5.48504	1.06279	7	2.51453
P09382	Galectin-1 OS=Homo sapiens GN=LGALS1 PE=1 SV=2 - [LEG1_HUMAN]	48.15	6	6	30	135	14.7062	5.50342	0.862999	9	6.55227	0.962935	9	8.61402	1.18453	12	26.2278	1.21876	9	3.45663	0.975196	9	10.7497	0.759576	12	17.3921	0.887697	9	3.59128	1.0294	9	2.16768	1.17423	12	12.1892	1.13936	9	7.84886	1.0094	9	2.59477	0.823596	12	13.3746
K4EN11	GAPDH (Fragment) OS=Homo sapiens PE=4 SV=1 - [K4EN11_HUMAN]	48.15	1	1	1	27	2.83038	5.61768							1.1356	1								0.99873	1								0.860828	1								1.02694	1
C9JBI3	Phosphoserine phosphatase (Fragment) OS=Homo sapiens GN=PSPH PE=1 SV=1 - [C9JBI3_HUMAN]	48.13	7	7	21	187	20.7318	6.93213	1.05576	4	2.40478	1.00835	7	5.38243	0.815678	10	10.0329	0.912972	4	11.9793	1.00839	7	5.98802	1.14224	10	15.0634	1.09828	4	6.25053	1.03761	7	6.25229	0.740052	10	32.9546	0.890673	4	8.35959	0.968131	7	1.26411	1.38161	10	13.6178
P22695	Cytochrome b-c1 complex subunit 2, mitochondrial OS=Homo sapiens GN=UQCRC2 PE=1 SV=3 - [QCR2_HUMAN]	48.12	16	16	88	453	48.4129	8.63135	1.04145	38	8.45033	1.0265	26	6.4548	1.01767	24	8.81552	0.958305	38	11.9509	0.988947	26	8.91112	0.952751	24	6.33675	0.981087	38	10.3803	0.999742	26	8.64464	1.00966	24	14.1346	0.971899	38	15.8418	1.01142	26	9.72404	0.992515	24	9.49976
B2RDX5	cDNA, FLJ96812, highly similar to Homo sapiens threonyl-tRNA synthetase (TARS), mRNA OS=Homo sapiens PE=1 SV=1 - [B2RDX5_HUMAN]	48.1	34	35	248	711	82.0612	6.66846	1.01249	90	7.21155	0.963485	78	8.33137	0.996902	79	10.1949	0.97086	90	9.76445	1.00669	78	9.07995	1.02159	79	6.78835	1.0074	90	6.5604	1.01941	78	8.17586	1.0049	79	11.8854	1.01652	90	8.39697	1.00931	78	7.40533	1.00402	79	12.5734
Q99848	Probable rRNA-processing protein EBP2 OS=Homo sapiens GN=EBNA1BP2 PE=1 SV=2 - [EBP2_HUMAN]	48.04	15	15	44	306	34.8304	10.0962	1.17613	18	12.1403	1.26349	7	13.3139	0.982001	18	8.00724	0.733042	18	34.8154	0.754661	7	6.4162	1.02575	18	9.89594	1.17756	18	13.5097	1.13938	7	4.95139	0.935485	18	17.718	0.72288	18	38.7632	0.774412	7	7.47793	1.00679	18	11.4224
C9J1Z8	ADP-ribosylation factor 5 (Fragment) OS=Homo sapiens GN=ARF5 PE=1 SV=1 - [C9J1Z8_HUMAN]	48	2	6	71	150	17.0959	7.34229	1.02884	2	4.06001	0.998455	2	0.890775	1.06649	3	26.9654	1.00379	2	1.10028	1.08756	2	3.48245	0.997463	3	0.0412859	0.934884	2	5.47593	0.921136	2	7.57154	0.877548	3	0.583452	1.0589	2	11.6138	0.997683	2	2.23102	0.935531	3	9.23749
Q99584	Protein S100-A13 OS=Homo sapiens GN=S100A13 PE=1 SV=1 - [S10AD_HUMAN]	47.96	5	5	21	98	11.4641	6.16357	0.957743	8	14.2209	0.93746	8	8.81356	0.97936	5	4.31109	1.07399	8	7.1496	1.02595	8	6.3573	0.950986	5	1.97774	0.997373	8	5.72369	1.03359	8	7.89616	0.974479	5	8.15352	0.997353	8	5.10696	1.00828	8	3.7182	0.956757	5	13.3702
P02786	Transferrin receptor protein 1 OS=Homo sapiens GN=TFRC PE=1 SV=2 - [TFR1_HUMAN]	47.89	33	33	183	760	84.8179	6.60986	1.04329	72	8.20454	1.09199	56	9.75667	1.09758	55	10.4691	0.901007	72	10.5994	0.916166	56	11.5328	1.00141	55	10.5484	1.03173	72	6.10903	1.00842	56	7.2807	0.955555	55	27.4187	0.952694	72	12.2836	0.959229	56	8.16112	0.965219	55	10.9964
J3KTA4	Probable ATP-dependent RNA helicase DDX5 OS=Homo sapiens GN=DDX5 PE=1 SV=1 - [J3KTA4_HUMAN]	47.88	21	29	200	614	69.0438	8.85107	1.0935	54	11.037	1.0117	42	8.62909	0.98028	40	8.58277	0.851945	54	16.4564	1.01436	42	7.21692	0.989825	40	10.315	1.1117	54	10.7944	1.0116	42	5.4761	1.00118	40	10.524	0.901104	54	20.9796	0.98518	42	5.70129	1.01289	40	7.67545
A0A0S2Z4N8	Vasodilator-stimulated phosphoprotein isoform 2 (Fragment) OS=Homo sapiens GN=VASP PE=2 SV=1 - [A0A0S2Z4N8_HUMAN]	47.87	1	14	47	328	35.4058	8.93896	1.03788	1		0.877326	2	9.95152	0.931456	2	17.4636	0.99963	1		1.05657	2	7.94111	1.01011	2	10.1969	0.987802	1		0.930368	2	5.54687	1.14157	2	0.844859	0.979536	1		1.14559	2	5.74391	0.88944	2	0.365624
P12956	X-ray repair cross-complementing protein 6 OS=Homo sapiens GN=XRCC6 PE=1 SV=2 - [XRCC6_HUMAN]	47.78	31	31	212	609	69.7991	6.63916	1.0276	77	6.88569	0.993057	70	5.36118	0.937828	64	11.9969	0.941999	77	11.6827	1.00491	70	6.92236	1.06517	64	7.80589	1.04564	77	10.9382	1.00332	70	6.83921	0.953899	64	11.6931	0.941354	77	10.9388	0.98821	70	6.56274	1.04442	64	7.48882
B3KM48	cDNA FLJ10286 fis, clone HEMBB1001384, highly similar to COP9 signalosome complex subunit 4 OS=Homo sapiens PE=2 SV=1 - [B3KM48_HUMAN]	47.78	17	17	43	406	46.2257	5.8335	1.02389	17	9.29779	0.99426	12	4.67509	0.925697	14	11.4485	0.999713	17	8.92023	1.02568	12	5.26273	0.98399	14	7.74204	1.05377	17	7.02256	1.00595	12	2.64155	0.956732	14	19.3575	0.97479	17	8.03317	0.991617	12	4.63523	1.04338	14	13.6946
K7EN45	Peptidyl-prolyl cis-trans isomerase (Fragment) OS=Homo sapiens GN=PIN1 PE=1 SV=1 - [K7EN45_HUMAN]	47.78	3	3	4	90	9.93686	5.0083	0.948627	2	5.02882	1.05659	2	0.607119				1.0145	2	4.66954	0.959574	2	11.1608				0.95226	2	11.5717	1.03876	2	5.29886				1.13971	2	3.79569	0.938902	2	4.2624
A0A0S2Z4I9	Vasodilator-stimulated phosphoprotein isoform 3 (Fragment) OS=Homo sapiens GN=VASP PE=2 SV=1 - [A0A0S2Z4I9_HUMAN]	47.71	1	14	44	327	35.2778	8.93896	0.911886	1					0.916059	1		1.06732	1					0.927461	1		0.848461	1					1.32938	1		1.2972	1					0.820535	1
Q2TNB3	Cell migration-inducing protein 22 OS=Homo sapiens PE=2 SV=1 - [Q2TNB3_HUMAN]	47.7	12	12	57	239	27.3313	5.57959	1.04002	20	6.13604	0.982768	17	9.64325	0.891511	20	15.393	0.905293	20	14.0406	1.04509	17	9.91241	1.11671	20	14.8625	1.04139	20	10.8008	1.03396	17	12.1753	0.940692	20	14.4798	0.970537	20	7.92792	1.00013	17	5.69745	1.04987	20	7.61502
Q8WXX5	DnaJ homolog subfamily C member 9 OS=Homo sapiens GN=DNAJC9 PE=1 SV=1 - [DNJC9_HUMAN]	47.69	11	11	18	260	29.8911	5.73193	0.999669	7	13.3306	1.04912	8	6.92985	1.08181	3	16.2163	0.97303	7	11.1102	1.0878	8	6.70198	0.805363	3	26.3634	0.996469	7	6.32543	0.978395	8	9.45679	1.35916	3	12.4861	1.05605	7	18.891	0.921114	8	5.06807	0.796729	3	17.5723
P12814	Alpha-actinin-1 OS=Homo sapiens GN=ACTN1 PE=1 SV=2 - [ACTN1_HUMAN]	47.65	23	39	245	892	102.993	5.41455	1.04874	28	7.8182	1.02417	28	4.54166	0.964426	27	9.61117	0.97763	28	8.96605	1.00187	28	5.66389	1.05951	27	5.70962	1.03457	28	6.91687	0.983957	28	7.08205	0.968338	27	9.77856	0.929594	28	11.6243	0.98181	28	4.06034	1.01749	27	8.068
O00231	26S proteasome non-ATPase regulatory subunit 11 OS=Homo sapiens GN=PSMD11 PE=1 SV=3 - [PSD11_HUMAN]	47.63	19	19	85	422	47.434	6.48096	1.00719	29	8.48034	0.999877	26	4.97122	0.933818	30	10.3153	0.934891	29	10.8084	0.979444	26	8.61636	1.02158	30	8.57777	1.01863	29	6.93583	1.01577	26	5.73481	0.925863	30	12.9466	0.947267	29	12.6148	0.98202	26	6.65098	1.05136	30	16.1813
P62318	Small nuclear ribonucleoprotein Sm D3 OS=Homo sapiens GN=SNRPD3 PE=1 SV=1 - [SMD3_HUMAN]	47.62	4	4	61	126	13.9073	10.3159	0.984323	26	4.97201	0.994365	18	6.14055	1.0205	17	8.75881	0.999134	26	9.49032	1.09149	18	4.73621	1.13129	17	7.03809	1.03145	26	4.08731	0.970869	18	5.37584	0.758329	17	16.3244	0.966371	26	6.60762	0.998065	18	4.89608	1.01283	17	5.27896
P49773	Histidine triad nucleotide-binding protein 1 OS=Homo sapiens GN=HINT1 PE=1 SV=2 - [HINT1_HUMAN]	47.62	4	4	19	126	13.7931	6.94678	0.98565	8	7.888	0.961583	6	7.15449	0.914848	5	4.38489	1.00386	8	10.0605	0.991014	6	8.35196	1.01553	5	6.63103	1.02759	8	2.61126	1.05302	6	5.32486	1.12461	5	14.0556	0.973653	8	10.1365	0.989979	6	4.82008	0.993239	5	6.20939
Q9UPN1	Serine/threonine-protein phosphatase (Fragment) OS=Homo sapiens GN=PPP1CC PE=3 SV=1 - [Q9UPN1_HUMAN]	47.62	2	13	107	294	33.7518	5.24951	1.12993	2	8.85982	0.975065	3	7.77505	1.01327	3	12.5385	0.807357	2	10.6623	1.0167	3	0.64121	1.03461	3	9.26761	1.02528	2	6.08968	0.9421	3	5.45321	1.00338	3	14.4632	0.956615	2	16.244	1.04074	3	1.04256	0.963805	3	7.66909
B2RDY9	Adenylyl cyclase-associated protein OS=Homo sapiens PE=2 SV=1 - [B2RDY9_HUMAN]	47.58	18	18	115	475	51.5826	8.22119	0.979936	37	7.93515	0.949328	39	8.57311	0.951058	39	10.646	1.01553	37	11.4438	1.02271	39	7.59055	1.03634	39	8.11183	1.00369	37	8.57614	1.01794	39	7.14053	1.00342	39	16.0411	1.03405	37	11.1691	1.01641	39	7.50413	0.960207	39	12.373
H0YN26	Acidic leucine-rich nuclear phosphoprotein 32 family member A OS=Homo sapiens GN=ANP32A PE=1 SV=1 - [H0YN26_HUMAN]	47.46	5	11	75	177	19.9851	4.57666	0.976705	9	13.5175	0.973761	6	6.15431	0.937235	9	13.8535	1.06777	9	17.6575	1.05613	6	1.93136	0.960575	9	7.9457	0.93988	9	4.9231	0.994573	6	9.68091	1.06374	9	6.30218	1.0354	9	13.6013	1.00733	6	3.80298	0.997706	9	6.20849
Q53GQ0	Very-long-chain 3-oxoacyl-CoA reductase OS=Homo sapiens GN=HSD17B12 PE=1 SV=2 - [DHB12_HUMAN]	47.44	13	13	71	312	34.3022	9.31982	0.991409	25	6.17838	1.04727	26	10.3055	0.999857	20	7.71765	1.03528	25	12.4936	0.971539	26	9.36892	1.04143	20	8.54826	0.96929	25	12.0413	1.00723	26	10.6285	0.970799	20	20.846	1.03654	25	14.4455	0.994181	26	13.4115	0.960362	20	20.4612
P16403	Histone H1.2 OS=Homo sapiens GN=HIST1H1C PE=1 SV=2 - [H12_HUMAN]	47.42	5	14	182	213	21.3517	10.9312	1.10568	9	11.2483	1.22775	13	11.3644	1.00804	13	39.2558	0.66085	9	9.84662	0.707315	13	36.6988	1.01303	13	34.5851	1.16115	9	6.6141	1.17286	13	35.0983	0.876547	13	29.0233	0.777081	9	33.6925	0.814519	13	21.2796	1.09717	13	13.7481
F8W1A4	Adenylate kinase 2, mitochondrial OS=Homo sapiens GN=AK2 PE=1 SV=1 - [F8W1A4_HUMAN]	47.41	9	9	47	232	25.6143	7.82568	0.965102	18	9.43735	1.01298	14	6.00063	0.942353	15	10.2271	0.944522	18	8.00571	1.01946	14	10.4013	1.01696	15	7.28468	1.02917	18	2.79943	0.982687	14	8.93503	0.959591	15	17.3541	1.06997	18	13.6825	0.9969	14	3.06231	1.06719	15	13.9947
Q9NZM1	Myoferlin OS=Homo sapiens GN=MYOF PE=1 SV=1 - [MYOF_HUMAN]	47.4	85	85	334	2061	234.561	6.17627	1.05545	130	9.66564	1.11437	93	7.20685	0.990742	111	10.8482	0.913834	130	12.7319	1.00358	93	7.84577	1.0787	111	9.57334	1.08625	130	7.68426	0.932618	93	7.94809	0.842729	111	21.4024	0.908396	130	17.1925	0.941004	93	8.93893	1.05511	111	10.1334
Q9Y2Z0	Protein SGT1 homolog OS=Homo sapiens GN=SUGT1 PE=1 SV=3 - [SGT1_HUMAN]	47.4	2	15	65	365	40.9985	5.16064	0.972332	2	2.65849	0.927796	2	6.06702	0.979192	2	9.35915	1.00761	2	12.3372	1.10488	2	7.90662	0.93246	2	9.93154	0.975884	2	5.31271	0.925329	2	10.9379	1.16648	2	23.1474	1.07972	2	0.202206	1.05036	2	4.29155	0.910142	2	8.78691
G3V3L4	AP-5 complex subunit mu-1 OS=Homo sapiens GN=AP5M1 PE=1 SV=1 - [G3V3L4_HUMAN]	47.37	1	1	2	38	4.21509	8.03076	0.933118	1					0.913366	1		0.941091	1					0.932495	1		1.0881	1					1.04121	1		1.0427	1					1.12988	1
Q15008	26S proteasome non-ATPase regulatory subunit 6 OS=Homo sapiens GN=PSMD6 PE=1 SV=1 - [PSMD6_HUMAN]	47.3	20	20	87	389	45.5023	5.61768	1.03462	33	9.94677	0.938395	26	9.25097	0.956552	28	11.2095	0.931991	33	12.0101	1.01769	26	6.02908	1.08627	28	7.73133	1.01388	33	8.06248	1.00323	26	7.87293	0.956813	28	14.8833	0.986396	33	12.7186	1.03757	26	5.49146	0.981171	28	10.5135
P45880	Voltage-dependent anion-selective channel protein 2 OS=Homo sapiens GN=VDAC2 PE=1 SV=2 - [VDAC2_HUMAN]	47.28	11	11	101	294	31.5465	7.56201	0.95869	41	8.83252	0.968582	27	9.68219	0.958648	33	8.97865	1.02341	41	8.5797	1.03268	27	7.50565	1.04214	33	5.70883	0.962825	41	5.14443	0.971908	27	8.19495	0.986209	33	19.3209	1.06979	41	9.12237	1.04032	27	7.39573	1.04378	33	13.4013
Q2NL95	DDX19B protein (Fragment) OS=Homo sapiens GN=DDX19B PE=2 SV=1 - [Q2NL95_HUMAN]	47.22	2	17	49	449	50.6122	7.34229	0.951632	2	1.3132	1.14025	1		1.07863	2	1.00544	1.33551	2	3.24901	0.701406	1		1.08639	2	4.96898	0.921498	2	1.38644	1.14468	1		0.677054	2	3.4062	0.891622	2	4.43266	0.991358	1		1.15889	2	9.35515
P63173	60S ribosomal protein L38 OS=Homo sapiens GN=RPL38 PE=1 SV=2 - [RL38_HUMAN]	47.14	4	5	38	70	8.21273	10.0962	1.11273	11	6.81741	1.08683	9	7.91629	1.16539	7	14.6134	0.875393	11	17.7719	0.921289	9	8.96705	0.994733	7	2.51143	1.05435	11	5.6457	1.0036	9	6.5376	1.09058	7	10.2332	0.874404	11	11.4595	0.976274	9	1.13615	0.905868	7	11.834
Q59GB4	Dihydropyrimidinase-like 2 variant (Fragment) OS=Homo sapiens PE=2 SV=1 - [Q59GB4_HUMAN]	47.13	12	22	60	628	68.1415	6.23975	0.938501	6	5.90349	1.04901	12	3.86915	1.00517	10	3.09811	1.08261	6	10.2099	1.00387	12	4.12427	0.965373	10	6.69761	0.929324	6	6.30614	1.00696	12	5.21658	0.998642	10	17.2663	1.08606	6	10.5607	0.965125	12	4.14409	0.970996	10	2.7492
B7Z4K8	cDNA FLJ52869, highly similar to Homo sapiens basic leucine zipper and W2 domains 2 (BZW2), mRNA OS=Homo sapiens PE=2 SV=1 - [B7Z4K8_HUMAN]	47.07	16	21	80	393	45.2795	6.66846	1.04432	13	5.00663	1.0149	14	6.12848	0.988152	18	16.3647	0.931172	13	9.81954	1.03331	14	2.96745	0.983559	18	11.9942	1.0373	13	8.03037	0.961939	14	10.3466	1.05387	18	15.6377	0.970497	13	10.188	0.98835	14	7.66428	0.991857	18	13.7729
Q9UKM9	RNA-binding protein Raly OS=Homo sapiens GN=RALY PE=1 SV=1 - [RALY_HUMAN]	47.06	14	14	46	306	32.4436	9.17334	1.03874	12	6.00677	0.965942	14	7.49406	0.930365	13	11.7506	1.01883	12	13.27	1.05864	14	5.79741	1.01431	13	8.04324	1.05785	12	7.3906	0.94663	14	7.92123	1.0053	13	7.64096	0.969578	12	11.0509	1.01932	14	4.44775	0.977591	13	4.42864
F5GXX5	Dolichyl-diphosphooligosaccharide--protein glycosyltransferase subunit DAD1 OS=Homo sapiens GN=DAD1 PE=1 SV=1 - [F5GXX5_HUMAN]	47.06	4	4	20	85	9.5481	7.18115	0.997037	5	8.07696	1.05567	8	11.8174	1.12385	7	7.67932	0.996855	5	16.1214	1.03389	8	4.87172	0.935973	7	3.86221	0.937009	5	5.70396	0.910886	8	6.29937	1.00257	7	17.2258	1.16093	5	4.07997	0.994267	8	10.6043	0.946122	7	6.22371
P61081	NEDD8-conjugating enzyme Ubc12 OS=Homo sapiens GN=UBE2M PE=1 SV=1 - [UBC12_HUMAN]	46.99	8	8	24	183	20.8866	7.69385	0.995296	10	10.8391	0.955132	8	5.35197	0.953818	6	5.36043	1.02029	10	8.95928	1.0496	8	9.57356	1.02711	6	8.33346	0.982594	10	4.97174	1.01675	8	8.0164	0.990899	6	6.7532	1.00461	10	7.94952	1.01322	8	7.41542	1.01615	6	9.38609
A0A024R1X8	Junction plakoglobin, isoform CRA_a OS=Homo sapiens GN=JUP PE=4 SV=1 - [A0A024R1X8_HUMAN]	46.98	22	28	141	745	81.6748	6.13818	1.0008	39	5.76166	1.03083	33	4.47801	1.11168	32	9.34449	0.986258	39	11.8032	1.00767	33	6.31744	0.919191	32	6.29353	0.982319	39	7.208	0.975109	33	3.57823	1.05484	32	16.7173	1.03447	39	8.31425	0.995688	33	5.35747	0.96278	32	10.1663
P42166	Lamina-associated polypeptide 2, isoform alpha OS=Homo sapiens GN=TMPO PE=1 SV=2 - [LAP2A_HUMAN]	46.97	17	24	111	694	75.4456	7.66455	1.03853	20	5.89726	1.01657	18	6.41218	1.00371	21	10.2011	0.974438	20	9.2277	1.05298	18	11.864	1.01922	21	10.4729	1.04122	20	5.0683	0.963501	18	9.09567	0.956479	21	18.2646	0.945922	20	6.60143	0.958734	18	6.56357	1.06734	21	10.1359
P61204	ADP-ribosylation factor 3 OS=Homo sapiens GN=ARF3 PE=1 SV=2 - [ARF3_HUMAN]	46.96	3	7	96	181	20.5877	7.43018	1.02925	14	4.94817	0.92898	7	5.88441	1.04335	11	15.7861	0.944203	14	5.94514	1.03941	7	2.41037	1.01594	11	9.25525	0.997101	14	8.11716	0.990807	7	3.02114	1.00896	11	13.5747	1.01441	14	12.8016	1.02643	7	4.35981	0.919271	11	8.29754
B2RD36	cDNA, FLJ96437 OS=Homo sapiens PE=2 SV=1 - [B2RD36_HUMAN]	46.94	12	12	53	245	28.0401	6.78564	0.934744	15	11.9797	0.950491	22	6.04803	1.04902	16	7.85862	1.15169	15	10.6101	1.0988	22	6.4987	1.00376	16	19.6888	0.956416	15	4.95421	0.951602	22	6.85086	0.961173	16	37.8412	1.05003	15	11.0359	1.02255	22	10.3591	1.00606	16	26.3954
P30085	UMP-CMP kinase OS=Homo sapiens GN=CMPK1 PE=1 SV=3 - [KCY_HUMAN]	46.94	7	7	35	196	22.2083	5.56689	0.942128	11	13.2789	0.936197	11	6.84062	0.883148	13	7.11186	1.0392	11	7.89352	1.07477	11	5.68474	1.06365	13	4.51244	0.984709	11	2.71143	0.968147	11	6.59457	0.940553	13	12.953	0.987973	11	7.00843	1.04166	11	4.55126	1.05489	13	3.438
O00483	Cytochrome c oxidase subunit NDUFA4 OS=Homo sapiens GN=NDUFA4 PE=1 SV=1 - [NDUA4_HUMAN]	46.91	4	4	25	81	9.36391	9.37842	0.984464	12	10.4741	0.931595	7	3.36598	0.887498	6	9.4407	0.998051	12	10.7482	1.09077	7	1.66077	0.903794	6	1.22135	1.00755	12	7.6002	0.979287	7	4.38172	1.21675	6	8.45216	1.02215	12	8.52038	1.03093	7	2.41476	1.00018	6	0.832576
P06576	ATP synthase subunit beta, mitochondrial OS=Homo sapiens GN=ATP5B PE=1 SV=3 - [ATPB_HUMAN]	46.88	18	18	297	529	56.5246	5.40186	0.997048	96	7.45167	1.01309	98	7.88525	0.988219	101	11.3202	1.00896	96	10.1046	1.00748	98	7.93637	1.05843	101	9.60335	0.997516	96	6.04942	0.986631	98	6.70661	0.905944	101	17.8529	0.990402	96	10.6663	0.990056	98	7.69087	1.06448	100	11.6244
B2R7U4	cDNA, FLJ93605, highly similar to Homo sapiens heme oxygenase (decycling) 1 (HMOX1), mRNA OS=Homo sapiens PE=2 SV=1 - [B2R7U4_HUMAN]	46.88	10	10	68	288	32.782	8.25049	0.725373	28	20.0422	0.708553	24	33.4814	0.686793	16	32.2981	1.08072	28	7.10749	0.714273	24	26.3272	0.658414	16	26.4446	0.793897	28	11.7797	1.39219	24	23.319	1.97542	16	20.6293	1.57533	28	16.8319	1.21312	24	20.3485	0.799281	16	28.8352
Q13162	Peroxiredoxin-4 OS=Homo sapiens GN=PRDX4 PE=1 SV=1 - [PRDX4_HUMAN]	46.86	9	11	99	271	30.5208	6.29053	1.07937	16	3.53665	1.05232	16	6.37187	0.877649	23	17.6728	0.951343	16	8.10579	1.01849	16	6.4353	1.11474	23	13.4046	1.05055	16	6.36248	1.00255	16	11.4195	0.662088	23	27.6763	0.864702	16	8.10856	0.966045	16	8.26417	1.30552	23	18.28
P55084	Trifunctional enzyme subunit beta, mitochondrial OS=Homo sapiens GN=HADHB PE=1 SV=3 - [ECHB_HUMAN]	46.84	21	21	95	474	51.2615	9.40771	0.954007	35	6.486	1.01306	32	8.36438	1.0005	28	9.49728	1.09256	35	7.11961	1.02589	32	6.81228	0.991076	28	7.48364	0.976074	35	8.13984	0.966184	32	5.27774	1.08266	28	11.2089	1.03477	35	9.05323	0.997768	32	8.28838	0.942361	28	7.19432
B7SBB1	Aryl hydrocarbon receptor interacting protein OS=Homo sapiens GN=AIP PE=4 SV=1 - [B7SBB1_HUMAN]	46.81	13	13	49	329	37.4771	6.53662	0.919514	20	7.9905	0.990183	16	6.9389	0.971017	13	6.91985	1.11145	20	13.0067	0.980044	16	7.76394	0.968285	13	8.13798	0.968587	20	6.05364	1.08382	16	4.05951	0.938696	13	25.8694	1.02887	20	11.4263	0.973156	16	8.0299	1.00028	13	20.0308
O14818	Proteasome subunit alpha type-7 OS=Homo sapiens GN=PSMA7 PE=1 SV=1 - [PSA7_HUMAN]	46.77	11	11	53	248	27.8696	8.45557	1.0294	19	3.79637	0.985829	16	7.20344	0.919849	18	7.71987	0.94828	19	4.593	1.01609	16	10.3479	1.03552	18	7.95797	1.0182	19	2.84774	0.947119	16	4.98272	1.03524	18	9.96857	0.978611	19	4.45092	1.01311	16	4.11161	0.974836	18	5.98975
Q00610	Clathrin heavy chain 1 OS=Homo sapiens GN=CLTC PE=1 SV=5 - [CLH1_HUMAN]	46.75	70	70	493	1675	191.493	5.69385	0.962388	182	8.38169	1.00103	154	9.1092	0.979969	156	10.4588	1.05197	182	13.3612	1.0016	154	9.67694	1.06267	156	7.81871	0.989297	182	8.2465	1.02647	154	8.73534	0.917792	156	19.8406	1.01762	182	10.2614	0.98352	154	9.0126	1.02537	156	13.1341
P13073	Cytochrome c oxidase subunit 4 isoform 1, mitochondrial OS=Homo sapiens GN=COX4I1 PE=1 SV=1 - [COX41_HUMAN]	46.75	9	9	57	169	19.564	9.51025	0.976257	16	10.6216	0.963403	18	7.2817	1.01498	23	12.4736	1.00215	16	6.99385	1.00009	18	9.23498	0.935912	23	7.99057	0.981734	16	7.5655	0.994294	18	7.60345	1.07412	23	7.22086	1.02072	16	7.23906	1.01047	18	6.59764	0.972536	23	8.42535
L8E7Q6	Alternative protein DOCK3 OS=Homo sapiens GN=DOCK3 PE=4 SV=1 - [L8E7Q6_HUMAN]	46.75	1	1	4	77	8.26711	10.8433
P33176	Kinesin-1 heavy chain OS=Homo sapiens GN=KIF5B PE=1 SV=1 - [KINH_HUMAN]	46.73	41	41	133	963	109.617	6.50732	1.03365	49	6.52921	0.986648	44	6.62227	0.93949	40	9.67928	0.984679	49	10.4609	1.00654	44	6.32588	1.02846	40	8.33071	1.03084	49	7.58092	1.0215	44	6.38298	1.01799	40	10.2938	0.959427	49	8.6603	1.00781	44	7.53006	1.01965	40	9.53066
P55145	Mesencephalic astrocyte-derived neurotrophic factor OS=Homo sapiens GN=MANF PE=1 SV=3 - [MANF_HUMAN]	46.7	9	9	51	182	20.6868	8.68994	0.979599	17	4.30219	1.04535	16	6.74656	1.02684	18	11.6394	0.995412	17	7.7054	0.942236	16	4.53153	0.949363	18	6.38881	1.06059	17	3.53171	1.0261	16	9.44844	1.09115	18	9.06909	0.998556	17	6.73411	0.985978	16	5.43967	0.931972	18	5.65036
K7EPR5	cAMP-dependent protein kinase type I-alpha regulatory subunit (Fragment) OS=Homo sapiens GN=PRKAR1A PE=1 SV=8 - [K7EPR5_HUMAN]	46.67	1	2	5	45	5.05953	5.90967	1.05443	1		1.05578	2	3.31491	1.09005	1		1.06288	1		1.00864	2	0.367477	0.942694	1		0.945873	1		0.981977	2	4.95352	0.811464	1		0.957269	1		0.949872	2	8.58726	1.19938	1
A8K7Q1	cDNA FLJ77770, highly similar to Homo sapiens nucleobindin 1 (NUCB1), mRNA OS=Homo sapiens PE=2 SV=1 - [A8K7Q1_HUMAN]	46.64	19	19	81	461	53.8503	5.24951	0.967099	29	6.36324	1.06724	28	8.9107	1.15726	24	11.5977	1.11869	29	8.66211	0.931732	28	9.24289	0.890053	24	10.1213	0.934255	29	8.26275	0.995707	28	6.06375	1.07035	24	12.4547	1.03371	29	11.9545	0.970096	28	9.01256	0.876929	24	15.9327
O00425	Insulin-like growth factor 2 mRNA-binding protein 3 OS=Homo sapiens GN=IGF2BP3 PE=1 SV=2 - [IF2B3_HUMAN]	46.63	20	24	101	579	63.6656	8.86572	0.976913	21	3.81532	0.989309	23	7.65573	0.974574	26	7.53693	1.04433	21	10.5223	0.981451	23	6.17135	1.00907	26	8.13269	1.00874	21	5.32011	1.02996	23	6.22522	1.07803	26	18.6435	0.99621	21	7.33917	1.01003	23	6.74491	1.00069	26	8.92348
A0A087WUK2	Heterogeneous nuclear ribonucleoprotein D-like OS=Homo sapiens GN=HNRNPDL PE=1 SV=1 - [A0A087WUK2_HUMAN]	46.56	16	18	125	363	40.0156	9.96436	1.06592	26	8.58991	1.01751	20	5.52224	0.952447	17	9.8414	0.95928	26	10.3998	1.01427	20	5.88242	0.993306	17	8.3657	0.992819	26	7.59023	0.975978	20	11.4694	0.945111	17	9.34943	0.937429	26	12.665	1.02018	20	8.70534	1.0576	17	8.74157
P62906	60S ribosomal protein L10a OS=Homo sapiens GN=RPL10A PE=1 SV=2 - [RL10A_HUMAN]	46.54	11	11	133	217	24.8155	9.93506	1.09868	56	7.55711	1.08621	36	6.7444	0.973484	41	10.9483	0.8716	56	9.23682	0.867613	36	6.40133	1.0462	41	6.86433	1.11483	56	8.02324	1.12095	36	8.37721	0.943444	41	16.7972	0.808001	56	13.7476	0.912342	36	6.37739	0.992465	41	9.22557
P41223	Protein BUD31 homolog OS=Homo sapiens GN=BUD31 PE=1 SV=2 - [BUD31_HUMAN]	46.53	8	8	16	144	16.9886	8.82178	0.991559	6	7.53173	1.00635	7	4.36836	1.00255	3	0.965908	0.926274	6	8.63616	0.996307	7	3.6997	0.994772	3	5.95688	1.0081	6	8.32485	0.989766	7	5.73876	1.04551	3	2.50872	1.02702	6	14.9288	0.981001	7	6.52709	0.9436	3	6.0538
Q15293	Reticulocalbin-1 OS=Homo sapiens GN=RCN1 PE=1 SV=1 - [RCN1_HUMAN]	46.53	11	11	58	331	38.8662	4.99561	0.956687	15	6.45999	1.02019	19	10.5395	1.00222	24	9.32304	1.0872	15	9.95852	1.00147	19	6.04414	0.956702	24	6.70612	0.98594	15	7.75129	1.03736	19	9.95045	1.05046	24	7.4911	1.00557	15	6.35084	0.954535	19	9.02277	1.00904	24	7.91257
A0A024R6W0	Aspartate aminotransferase OS=Homo sapiens GN=GOT2 PE=4 SV=1 - [A0A024R6W0_HUMAN]	46.51	18	18	140	430	47.4453	9.01221	1.02665	53	6.51527	0.966038	38	5.72185	0.950197	49	11.2314	0.997355	53	11.6482	1.01862	38	6.20358	1.0424	49	8.45555	0.986436	53	10.8518	0.999234	38	9.29431	0.947409	49	15.0747	0.999298	53	12.382	0.996915	38	6.23703	1.03299	49	9.30941
P09960	Leukotriene A-4 hydrolase OS=Homo sapiens GN=LTA4H PE=1 SV=2 - [LKHA4_HUMAN]	46.48	22	22	66	611	69.2412	6.17627	0.985583	26	7.55833	0.94657	16	6.13409	0.987668	24	9.97051	1.00451	26	11.7113	1.01129	16	6.76312	1.03528	24	8.77806	0.977464	26	8.86417	1.03644	16	6.09714	1.07564	24	13.1045	1.00258	26	10.6035	1.00618	16	4.2603	0.989792	24	16.9729
B4DDF7	cDNA FLJ53296, highly similar to Serine/threonine-protein phosphatase 2A 65 kDa regulatory subunit A alpha isoform OS=Homo sapiens PE=2 SV=1 - [B4DDF7_HUMAN]	46.46	16	22	103	579	64.1403	5.13525	1.01718	26	7.04546	0.976235	31	12.8897	0.944051	26	16.7797	0.983074	26	12.0753	0.979881	31	7.99308	0.947301	26	10.9393	0.986222	26	8.08856	1.02468	31	9.1637	1.00861	26	19.6044	1.02255	26	10.1191	1.01801	31	12.9961	1.05754	26	18.8698
M0QXF7	Myeloid-derived growth factor (Fragment) OS=Homo sapiens GN=MYDGF PE=1 SV=1 - [M0QXF7_HUMAN]	46.43	1	4	20	84	9.66357	4.99561				0.831034	1								1.19801	1								0.849855	1								1.14608	1
P62273	40S ribosomal protein S29 OS=Homo sapiens GN=RPS29 PE=1 SV=2 - [RS29_HUMAN]	46.43	3	3	8	56	6.6723	10.1255	1.12226	1		1.05553	5	5.7664	0.967897	2	0.219423	0.787062	1		0.94974	5	18.5629	0.755675	2	61.5948	1.24711	1		1.15032	5	22.9215	0.875481	2	4.30713	0.684405	1		0.905791	5	7.22143	1.35534	2	48.7876
P68133	Actin, alpha skeletal muscle OS=Homo sapiens GN=ACTA1 PE=1 SV=1 - [ACTS_HUMAN]	46.42	1	14	627	377	42.0239	5.38916	1.06318	1								0.910141	1								1.13947	1								0.810023	1
A8K3K1	cDNA FLJ78096, highly similar to Homo sapiens actin, alpha, cardiac muscle (ACTC), mRNA OS=Homo sapiens PE=2 SV=1 - [A8K3K1_HUMAN]	46.42	1	14	627	377	42.0199	5.38916							0.951578	1								1.08426	1								0.758754	1								1.19609	1
P62857	40S ribosomal protein S28 OS=Homo sapiens GN=RPS28 PE=1 SV=1 - [RS28_HUMAN]	46.38	3	3	50	69	7.8362	10.6968	1.14765	14	7.10098	1.05749	16	6.44414	0.972464	20	7.67671	0.839317	14	13.3435	0.848184	16	6.82746	0.946066	20	3.59372	1.06011	14	8.14641	1.12011	16	5.83012	1.08734	20	10.8839	0.863172	14	13.3419	0.951729	16	6.79822	0.979085	20	9.55512
H0YIC4	Citrate synthase (Fragment) OS=Homo sapiens GN=CS PE=1 SV=1 - [H0YIC4_HUMAN]	46.34	1	6	36	123	14.1144	9.56885	1.00857	1		0.964608	1					1.07571	1		1.0987	1					0.829283	1		0.842544	1					1.17673	1		1.1015	1
H7C2W9	60S ribosomal protein L31 (Fragment) OS=Homo sapiens GN=RPL31 PE=1 SV=1 - [H7C2W9_HUMAN]	46.3	8	8	66	108	12.8031	11.0044	1.09801	28	9.54045	1.09423	21	11.1994	0.979254	17	10.4619	0.88335	28	18.0954	0.857917	21	10.991	0.996482	17	9.33746	1.10319	28	15.2133	1.11747	21	6.91161	0.988642	17	33.4358	0.801543	28	16.2952	0.91051	21	12.723	0.967209	17	23.3076
Q99991	Vestigial like 1 (Drosophila), isoform CRA_a OS=Homo sapiens GN=WUGSC:H_GS188P18.1b PE=4 SV=1 - [Q99991_HUMAN]	46.3	1	1	1	54	6.14006	8.60205	0.946368	1								1.14226	1								0.934823	1								1.05705	1
B2R7C5	DNA helicase OS=Homo sapiens PE=2 SV=1 - [B2R7C5_HUMAN]	46.29	33	33	109	808	90.952	5.77002	1.04002	41	8.08931	0.993359	34	6.67218	1.09374	33	12.8459	0.936909	42	12.4571	1.03268	34	8.97557	0.898668	33	14.2109	1.04048	42	9.61046	0.99975	34	7.15305	1.1436	33	13.8254	0.950771	41	11.621	0.964663	34	5.66501	0.908164	33	15.0753
Q9Y4L1	Hypoxia up-regulated protein 1 OS=Homo sapiens GN=HYOU1 PE=1 SV=1 - [HYOU1_HUMAN]	46.15	40	40	330	999	111.266	5.22412	0.980634	107	5.9744	1.06165	118	6.39972	0.993349	103	11.7339	1.04641	107	11.2543	0.939522	118	9.23881	1.03035	105	9.34242	1.00394	107	8.42701	1.04707	118	8.33415	0.936472	105	22.4559	0.996564	107	9.64651	0.949269	118	9.12865	1.03556	105	11.1485
P62241	40S ribosomal protein S8 OS=Homo sapiens GN=RPS8 PE=1 SV=2 - [RS8_HUMAN]	46.15	9	9	100	208	24.1902	10.3159	1.06647	37	9.46174	1.05439	34	5.58494	1.03932	29	8.04715	0.876917	37	18.9646	0.930484	34	5.89475	1.00319	29	8.91962	1.06742	37	10.6865	1.04911	34	6.49347	1.04841	29	10.7142	0.90825	37	17.977	0.965099	34	7.52734	0.940499	29	8.96882
M0R083	Leukocyte antigen CD37 (Fragment) OS=Homo sapiens GN=CD37 PE=4 SV=8 - [M0R083_HUMAN]	46.15	1	1	1	26	2.75349	8.00146	0.93964	1								1.01245	1								0.987568	1								1.11038	1
A0A0G2JLK3	Lysosomal thioesterase PPT2 (Fragment) OS=Homo sapiens GN=PPT2 PE=1 SV=1 - [A0A0G2JLK3_HUMAN]	46.15	1	1	1	39	4.17405	6.48096	0.898659	1								1.1368	1								0.91408	1								1.16039	1
Q8N1G4	Leucine-rich repeat-containing protein 47 OS=Homo sapiens GN=LRRC47 PE=1 SV=1 - [LRC47_HUMAN]	46.14	25	25	112	583	63.4337	8.27979	0.981774	40	7.99242	0.972831	35	5.73323	0.935069	37	7.65312	0.993889	40	10.2514	1.0341	35	7.11715	1.00068	37	9.57458	1.00239	40	6.33991	0.96448	35	6.32465	1.0451	37	15.478	1.00951	40	9.66848	1.0124	35	5.26311	1.01007	37	8.71278
P10412	Histone H1.4 OS=Homo sapiens GN=HIST1H1E PE=1 SV=2 - [H14_HUMAN]	46.12	4	14	217	219	21.852	11.0337	1.10986	17	8.95723	1.08198	17	7.64407	0.905107	20	15.8355	0.876639	17	15.7247	0.901623	17	15.75	1.07269	20	13.2469	1.16105	17	14.4176	1.11215	17	19.206	0.860422	20	23.7779	0.822344	17	22.2518	0.91363	17	10.8299	1.1607	20	9.09823
H6VRF8	Keratin 1 OS=Homo sapiens GN=KRT1 PE=3 SV=1 - [H6VRF8_HUMAN]	46.12	21	29	155	644	66.013	8.11865	0.974212	25	12.8817	1.06962	34	8.71881	0.935349	29	12.2928	1.12033	25	9.28139	0.934758	34	9.3383	0.98872	29	10.5693	0.829458	25	8.81728	0.994336	34	7.25346	1.14929	29	14.6978	1.18548	25	9.44257	1.01668	34	7.529	0.902055	29	7.95423
Q2Q9H2	Glucose-6-phosphate 1-dehydrogenase (Fragment) OS=Homo sapiens GN=G6PD PE=3 SV=1 - [Q2Q9H2_HUMAN]	46.11	1	21	114	475	54.7898	7.07861	0.925862	2	2.10869							1.11906	2	0.642064							0.956935	2	4.80393							1.07416	2	8.07598
Q2VF42	Glucose-6-phosphate 1-dehydrogenase (Fragment) OS=Homo sapiens GN=G6PD PE=3 SV=1 - [Q2VF42_HUMAN]	46.11	1	21	118	475	54.7888	7.28369	1.05499	4	4.64441	0.97661	1		0.920152	1		1.09113	4	8.03133	0.891726	1		1.10696	1		0.890342	4	2.90588	1.16554	1		0.96461	1		1.04165	4	12.0981	0.970114	1		0.971051	1
Q14847	LIM and SH3 domain protein 1 OS=Homo sapiens GN=LASP1 PE=1 SV=2 - [LASP1_HUMAN]	45.98	13	13	70	261	29.6982	7.04932	0.994611	23	8.30492	0.963954	28	8.16194	0.949727	18	8.00644	1.00045	23	6.66638	1.04672	28	4.67281	0.954309	18	7.60391	0.981605	23	5.22094	0.981677	28	5.33337	1.12452	18	6.19603	1.01558	23	8.24106	1.02819	28	5.41965	0.954524	18	6.93517
B2LRS6	Truncated MHC class I antigen (Fragment) OS=Homo sapiens GN=HLA-B PE=4 SV=1 - [B2LRS6_HUMAN]	45.97	1	3	7	124	13.6645	9.70068							1.21093	1								0.970205	1								0.586606	1								1.29283	1
Q9NTK5	Obg-like ATPase 1 OS=Homo sapiens GN=OLA1 PE=1 SV=2 - [OLA1_HUMAN]	45.96	17	17	93	396	44.7153	7.81104	0.99728	36	7.58793	0.969689	30	7.18968	0.946856	27	7.72231	0.940802	36	10.2982	1.00913	30	7.00893	1.052	27	6.48498	1.05665	36	8.12111	1.00609	30	6.8625	1.00987	27	13.7947	0.957702	36	10.9368	1.01976	30	7.47769	0.975503	27	10.3197
O60701	UDP-glucose 6-dehydrogenase OS=Homo sapiens GN=UGDH PE=1 SV=1 - [UGDH_HUMAN]	45.95	21	21	133	494	54.9893	7.12256	0.89363	51	6.97568	0.879449	45	9.747	0.939828	37	14.0659	1.10357	51	7.77705	0.986329	45	7.37847	0.970911	37	6.90625	0.925111	51	6.7076	1.07885	45	7.15391	1.07216	37	22.5278	1.19322	51	11.5226	1.08806	45	9.6556	1.02206	37	12.3437
P55010	Eukaryotic translation initiation factor 5 OS=Homo sapiens GN=EIF5 PE=1 SV=2 - [IF5_HUMAN]	45.94	19	19	109	431	49.1918	5.57959	1.0772	40	7.92735	0.988601	32	7.90078	0.918389	37	7.3357	0.925677	40	12.431	1.00055	32	7.75044	1.07361	37	9.28037	1.05306	40	7.23857	1.0295	32	7.82042	0.869679	37	13.4936	0.922575	40	13.4664	1.0035	32	8.3474	1.0748	37	8.94949
B4DPW9	cDNA FLJ51929, highly similar to Plastin-3 OS=Homo sapiens PE=2 SV=1 - [B4DPW9_HUMAN]	45.94	20	25	105	603	67.5566	5.65576	1.02607	24	6.08625	0.993359	25	4.07415	0.939395	34	7.34919	0.975218	24	8.9951	1.01789	25	7.15433	1.06041	34	5.65924	1.02982	24	7.55267	0.991843	25	8.87107	0.960449	34	9.95503	0.947852	24	6.52255	0.994041	25	6.74632	0.993848	34	6.46558
P62136	Serine/threonine-protein phosphatase PP1-alpha catalytic subunit OS=Homo sapiens GN=PPP1CA PE=1 SV=1 - [PP1A_HUMAN]	45.76	3	14	113	330	37.4878	6.32861	1.06557	6	4.58749	1.03485	4	1.79307	1.01647	4	1.24718	0.936276	6	6.38323	1.04282	4	7.41863	1.06352	4	2.0314	1.05713	6	2.76842	0.936262	4	7.46186	0.914419	4	9.45555	0.889893	6	3.34791	0.980186	4	0.504679	1.01489	4	4.70431
B2RD79	cDNA, FLJ96494, highly similar to Homo sapiens ubiquitin specific peptidase 14 (tRNA-guanine transglycosylase) (USP14), mRNA OS=Homo sapiens PE=2 SV=1 - [B2RD79_HUMAN]	45.75	22	22	83	494	56.006	5.30029	0.947097	26	5.61205	0.946748	28	11.0173	0.959811	29	11.4007	1.07118	26	11.8842	1.04587	28	11.0989	1.04304	29	12.7854	0.952563	26	13.975	0.992116	28	8.36609	0.910019	29	29.4043	1.05949	26	12.3739	1.03001	28	6.32887	1.02377	29	14.7915
P36871	Phosphoglucomutase-1 OS=Homo sapiens GN=PGM1 PE=1 SV=3 - [PGM1_HUMAN]	45.73	7	23	100	562	61.4105	6.75635	0.984358	13	4.87066	0.99878	12	7.57257	1.05113	8	9.53993	1.0002	13	5.13588	0.987589	12	4.47418	0.941627	8	2.70883	0.979721	13	7.63076	1.01762	12	4.84699	1.05073	8	7.53859	1.03164	13	10.3546	0.998036	12	2.50346	0.915685	8	8.7207
Q9NR30	Nucleolar RNA helicase 2 OS=Homo sapiens GN=DDX21 PE=1 SV=5 - [DDX21_HUMAN]	45.72	32	35	203	783	87.2904	9.27588	1.12174	67	9.14186	1.03203	55	6.69278	0.880949	66	11.843	0.831712	67	14.7306	0.980959	55	4.99381	1.14351	66	8.1907	1.11695	67	6.81965	1.0216	55	7.65139	0.838666	66	18.3379	0.86104	67	13.9366	0.949443	55	6.21537	1.09891	66	15.5459
P07814	Bifunctional glutamate/proline--tRNA ligase OS=Homo sapiens GN=EPRS PE=1 SV=5 - [SYEP_HUMAN]	45.7	57	58	214	1512	170.483	7.32764	1.02548	83	7.03381	1.00105	59	9.28267	0.882137	67	10.3623	0.951042	83	9.81437	0.987076	59	9.05057	1.12201	67	7.99721	1.04766	83	6.80382	1.01909	59	6.2931	0.884833	67	18.3002	0.948691	83	10.9353	0.986818	59	8.45762	1.05722	67	10.0604
P53999	Activated RNA polymerase II transcriptional coactivator p15 OS=Homo sapiens GN=SUB1 PE=1 SV=3 - [TCP4_HUMAN]	45.67	7	7	74	127	14.3864	9.59814	0.988375	27	9.56264	0.955922	22	9.42111	0.932008	25	16.1615	0.963785	27	10.74	1.03095	22	9.17091	1.02983	25	10.0431	1.02409	27	7.59647	0.99731	22	3.65622	1.09304	25	12.1657	0.999509	27	12.2647	1.02434	22	8.928	0.991317	25	9.87924
B5BU83	Stathmin OS=Homo sapiens GN=STMN1 PE=2 SV=1 - [B5BU83_HUMAN]	45.64	8	8	46	149	17.32	5.97314	0.985055	16	8.03267	0.969303	14	7.72069	0.929328	16	8.8525	0.983214	16	8.33937	1.09964	14	4.15398	1.05498	16	7.21829	1.01029	16	9.46722	0.966157	14	4.09063	1.01922	16	11.4801	0.965209	16	7.36455	0.995133	14	4.33125	1.01672	16	9.99329
P28074	Proteasome subunit beta type-5 OS=Homo sapiens GN=PSMB5 PE=1 SV=3 - [PSB5_HUMAN]	45.63	11	11	49	263	28.4622	6.91748	1.00877	19	9.96488	0.931812	13	5.82702	0.920492	17	5.34841	0.989722	19	12.4086	1.04285	13	6.94667	1.05868	17	7.43372	0.987591	19	10.8508	1.00868	13	5.02561	1.01221	17	6.18094	1.0279	19	10.5784	1.04956	13	4.25373	0.970284	17	13.8811
O43399	Tumor protein D54 OS=Homo sapiens GN=TPD52L2 PE=1 SV=2 - [TPD54_HUMAN]	45.63	8	8	35	206	22.2243	5.36377	0.985529	11	8.76561	0.955045	10	7.07909	0.884508	14	11.7054	0.988221	11	6.79883	1.06253	10	7.42782	1.05375	14	7.85864	0.900468	11	13.6425	0.97194	10	6.8221	0.969669	14	19.4368	1.14217	11	20.7859	1.0201	10	3.50885	1.03892	14	8.80979
Q13177	Serine/threonine-protein kinase PAK 2 OS=Homo sapiens GN=PAK2 PE=1 SV=3 - [PAK2_HUMAN]	45.61	14	18	92	524	58.0059	5.96045	1.00107	30	5.7483	0.974605	20	5.77162	1.00933	22	8.79333	1.03159	30	14.0684	0.999614	20	5.35881	0.995935	22	7.85349	0.968146	30	7.04057	1.02073	20	6.84746	0.996374	22	17.2014	1.01336	30	8.87266	0.990103	20	6.95153	1.00479	22	7.28309
P11908	Ribose-phosphate pyrophosphokinase 2 OS=Homo sapiens GN=PRPS2 PE=1 SV=2 - [PRPS2_HUMAN]	45.6	6	12	46	318	34.747	6.60986	1.01747	8	7.96135	0.990994	7	9.60293	1.00454	9	8.55591	0.988382	8	8.10028	1.01496	7	7.57845	1.03267	9	14.7494	1.03682	8	8.63598	1.03501	7	5.96661	0.966482	9	9.25173	0.964023	8	10.9953	0.946312	7	7.42784	1.02163	9	7.13454
H0Y990	ATP-binding cassette sub-family E member 1 (Fragment) OS=Homo sapiens GN=ABCE1 PE=1 SV=1 - [H0Y990_HUMAN]	45.58	1	7	28	147	16.2257	8.80713	0.994364	1		1.07775	2	1.98629				0.994254	1		0.954012	2	3.19012				0.958873	1		0.966729	2	1.71363				1.08829	1		0.994019	2	1.07582
A0A0J9YYL3	Poly(U)-binding-splicing factor PUF60 (Fragment) OS=Homo sapiens GN=PUF60 PE=1 SV=1 - [A0A0J9YYL3_HUMAN]	45.54	18	18	61	505	54.592	5.33838	1.03056	21	5.08654	0.971013	20	5.55417	0.955169	20	13.9929	0.951019	21	17.8756	1.02845	20	7.59959	1.00984	20	12.0098	1.02775	21	9.79494	0.972243	20	4.82647	0.994256	20	22.5566	0.950025	21	9.8907	1.00743	20	11.1129	0.981295	20	11.6383
P12429	Annexin A3 OS=Homo sapiens GN=ANXA3 PE=1 SV=3 - [ANXA3_HUMAN]	45.51	15	15	79	323	36.3527	5.92236	1.04952	26	7.41453	0.997188	26	7.75344	0.954817	27	11.8979	0.882412	26	9.06673	0.979951	26	7.14504	1.04508	27	4.99062	1.05448	26	8.11638	0.990403	26	7.02188	0.935181	27	14.6471	0.96159	26	13.1304	1.04533	26	11.3946	1.04026	27	9.41175
P53396	ATP-citrate synthase OS=Homo sapiens GN=ACLY PE=1 SV=3 - [ACLY_HUMAN]	45.5	44	44	280	1101	120.762	7.32764	0.987874	107	8.20661	1.00619	95	7.1331	1.12176	78	13.539	1.01876	107	10.7062	0.967657	94	7.54267	0.950179	78	10.139	0.991048	107	6.55746	1.0323	95	4.98342	1.04046	78	23.3386	1.00247	107	9.04437	0.998808	95	6.94688	0.887266	78	17.2006
Q14247	Src substrate cortactin OS=Homo sapiens GN=CTTN PE=1 SV=2 - [SRC8_HUMAN]	45.45	25	25	122	550	61.5485	5.40186	1.01356	42	9.67047	0.989667	40	6.8976	0.918602	40	13.8293	0.984783	42	10.0434	1.01644	40	5.72001	0.956312	40	8.74921	1.01935	42	8.95919	0.998238	40	6.47516	1.09242	40	10.4842	0.956581	42	12.5202	1.00991	40	5.26483	0.975816	40	11.4965
Q5T123	SH3 domain-binding glutamic acid-rich-like protein 3 OS=Homo sapiens GN=SH3BGRL3 PE=1 SV=1 - [Q5T123_HUMAN]	45.45	4	4	19	88	9.37476	9.36377	0.901597	6	7.69213	0.9281	7	7.12751	0.856347	6	8.8902	1.13799	6	8.4634	1.02741	7	7.47238	0.979436	6	3.65116	0.864063	6	6.82178	0.998637	7	3.6952	1.09752	6	9.26538	1.25588	6	8.87444	1.07965	7	5.37384	1.05855	6	6.32576
B3KX19	cDNA FLJ44500 fis, clone UTERU3000828, highly similar to 116 kDa U5 small nuclear ribonucleoprotein component OS=Homo sapiens PE=2 SV=1 - [B3KX19_HUMAN]	45.43	35	36	135	962	108.142	4.99561	1.02774	50	4.49474	1.01549	37	4.66486	1.02779	35	8.01518	0.93669	50	13.9304	1.01646	37	8.75852	0.989038	35	5.79227	1.05808	50	9.42534	0.990472	37	5.90817	0.957453	35	17.5939	0.933569	50	10.7957	0.989513	37	9.07893	0.977613	35	9.92158
F8W020	Nucleosome assembly protein 1-like 1 (Fragment) OS=Homo sapiens GN=NAP1L1 PE=1 SV=1 - [F8W020_HUMAN]	45.41	1	8	57	207	24.3513	4.51318				1.1614	1								0.945083	1								1.05765	1								0.824227	1
O75083	WD repeat-containing protein 1 OS=Homo sapiens GN=WDR1 PE=1 SV=4 - [WDR1_HUMAN]	45.38	21	21	72	606	66.1519	6.65381	1.01686	22	5.57088	1.00262	20	7.26771	0.917937	30	10.5724	1.01248	22	9.06154	0.982953	20	7.16748	1.08502	30	7.94241	1.02608	22	8.43751	1.01693	20	10.0321	0.923601	30	22.2562	0.957598	22	8.4982	1.00492	20	8.90515	1.05634	30	8.68208
B4DE36	Glucose-6-phosphate isomerase OS=Homo sapiens PE=2 SV=1 - [B4DE36_HUMAN]	45.28	19	19	191	530	60.1477	8.14795	0.900913	62	8.82313	1.00702	66	8.30068	1.09105	63	10.0785	1.17298	62	11.6511	0.990643	66	8.13924	0.975989	63	12.5191	0.914761	62	7.91819	1.02586	66	7.83088	0.918054	63	30.2674	1.12435	62	8.01187	0.979057	66	7.87435	0.953153	63	13.8996
Q14232	Translation initiation factor eIF-2B subunit alpha OS=Homo sapiens GN=EIF2B1 PE=1 SV=1 - [EI2BA_HUMAN]	45.25	13	13	41	305	33.6908	7.32764	1.04166	22	5.50148	0.944784	12	9.20183	1.01255	7	16.0911	0.988192	22	9.98099	1.06294	12	3.95637	1.07141	7	2.82743	1.01235	22	5.17709	0.98648	12	4.75886	0.76936	7	29.8165	0.965243	22	5.87382	1.02965	12	6.60949	1.11122	7	7.05276
P49755	Transmembrane emp24 domain-containing protein 10 OS=Homo sapiens GN=TMED10 PE=1 SV=2 - [TMEDA_HUMAN]	45.21	9	9	52	219	24.96	7.44482	1.01609	19	6.24271	0.993119	16	5.30842	1.00336	17	9.40285	1.00072	19	3.46521	1.01344	16	6.63183	1.04118	17	5.48497	1.00368	19	4.78047	0.995913	16	5.03703	0.995186	17	7.1897	0.988971	19	6.42404	1.01455	16	3.88479	0.955552	17	5.54743
B7Z809	cDNA FLJ56016, highly similar to C-1-tetrahydrofolate synthase, cytoplasmic OS=Homo sapiens PE=2 SV=1 - [B7Z809_HUMAN]	45.2	1	41	185	1020	110.428	8.55811	0.95913	1								1.28196	1								0.916677	1								0.937113	1
P20290	Transcription factor BTF3 OS=Homo sapiens GN=BTF3 PE=1 SV=1 - [BTF3_HUMAN]	45.15	6	8	29	206	22.1544	9.37842	1.13795	10	8.90574	1.01592	9	5.66332	0.892039	7	10.1574	0.795395	10	15.1809	0.837207	9	12.5258	0.93494	7	7.54781	1.13267	10	5.64278	0.969922	9	13.6294	1.09189	7	15.6629	0.838378	10	10.5611	1.00906	9	12.7133	1.03743	7	12.4602
X5DR54	NudE neurodevelopment protein 1 isoform B (Fragment) OS=Homo sapiens GN=NDE1 PE=1 SV=1 - [X5DR54_HUMAN]	45.07	12	12	29	335	37.6978	5.14795	1.09982	8	3.97711	1.05327	11	6.02964	1.08209	10	9.09934	0.88667	8	6.44354	1.02165	11	5.78118	0.980418	10	5.00646	1.06338	8	5.85374	0.986178	11	7.72403	0.954784	10	5.92334	0.869307	8	11.8256	0.936397	11	11.867	0.949189	10	6.53408
Q01813	ATP-dependent 6-phosphofructokinase, platelet type OS=Homo sapiens GN=PFKP PE=1 SV=2 - [PFKAP_HUMAN]	45.03	26	30	223	784	85.5415	7.54736	0.982659	63	6.83205	0.988201	63	8.64608	1.01312	67	8.3711	0.979318	63	11.0468	0.95203	63	6.19395	1.01109	67	6.99748	1.02623	63	7.47418	1.05231	63	7.43105	0.968382	67	14.5021	0.995997	63	9.44773	1.02011	63	6.65202	0.976937	67	11.4989
P62277	40S ribosomal protein S13 OS=Homo sapiens GN=RPS13 PE=1 SV=2 - [RS13_HUMAN]	45.03	8	8	66	151	17.2117	10.5356	1.08126	29	10.2623	1.06284	16	4.75143	1.03491	21	8.72489	0.868895	29	14.1169	0.910263	16	9.34597	0.971482	21	10.8313	1.0921	29	9.62848	1.05761	16	6.54965	1.03301	21	13.5905	0.858998	29	17.416	0.938017	16	7.71853	0.986272	21	9.64314
Q03252	Lamin-B2 OS=Homo sapiens GN=LMNB2 PE=1 SV=4 - [LMNB2_HUMAN]	45	25	29	99	620	69.9057	5.59229	1.00454	30	8.91353	0.972893	25	9.09887	0.999581	33	8.98904	0.980219	30	10.1878	1.03921	25	5.34222	0.979219	33	7.10086	1.02712	30	6.0546	0.958301	25	8.47807	1.04681	33	9.26245	0.990873	30	11.6693	1.01692	25	5.91904	0.980098	33	7.44938
Q9Y315	Deoxyribose-phosphate aldolase OS=Homo sapiens GN=DERA PE=1 SV=2 - [DEOC_HUMAN]	44.97	10	10	32	318	35.2085	8.93896	0.982261	12	7.35346	1.01883	9	12.0905	1.1926	11	11.5521	1.05001	12	12.1809	0.976059	9	5.04636	1.04516	11	6.84462	0.959518	12	7.45262	1.0029	9	1.08315	0.807375	11	18.4489	1.01044	12	8.75133	0.948798	9	11.6405	1.01808	11	18.6164
P05141	ADP/ATP translocase 2 OS=Homo sapiens GN=SLC25A5 PE=1 SV=7 - [ADT2_HUMAN]	44.97	5	16	193	298	32.8312	9.68604	1.00819	27	6.16175	0.976794	22	4.70224	0.956575	27	9.29779	0.967044	27	14.6776	1.07262	22	8.72788	1.09679	27	4.61481	0.98219	27	7.83513	0.961462	22	8.46505	0.947122	27	17.9414	1.06091	27	14.9468	1.03939	22	8.59197	1.00744	27	9.24522
P60891	Ribose-phosphate pyrophosphokinase 1 OS=Homo sapiens GN=PRPS1 PE=1 SV=2 - [PRPS1_HUMAN]	44.97	5	11	40	318	34.8119	6.97607	0.989973	7	6.65437	0.960371	6	5.98562	0.899745	5	6.98502	0.985929	7	9.30987	1.01449	6	3.54776	1.09772	5	8.65541	0.993008	7	2.98757	0.966991	6	4.20344	0.948993	5	10.7851	1.02662	7	13.5202	0.995674	6	4.99793	1.06267	5	6.11323
K7EP07	Tubulin-folding cofactor B (Fragment) OS=Homo sapiens GN=TBCB PE=1 SV=8 - [K7EP07_HUMAN]	44.97	7	7	20	169	19.2394	5.33838	1.02866	8	1.84638	0.986749	6	3.05882	1.00704	6	6.82166	0.994829	8	5.58104	1.00969	6	3.20548	0.898864	6	6.08573	1.0233	8	4.28188	1.00496	6	7.6046	1.13712	6	14.9407	0.925241	8	6.04763	1.01598	6	8.22276	0.928823	6	9.85039
H0YEF3	Ribonuclease H2 subunit C (Fragment) OS=Homo sapiens GN=RNASEH2C PE=1 SV=1 - [H0YEF3_HUMAN]	44.94	5	5	15	158	17.2198	5.37646	1.0097	6	6.13811	0.969392	5	4.25807	1.0499	4	4.25861	1.02576	6	7.0449	0.990247	5	9.641	1.05127	4	12.7922	0.982815	6	13.5445	1.01905	5	13.1991	0.789013	4	40.6183	0.963208	6	12.9523	0.987425	5	1.83044	1.08402	4	18.8623
Q13885	Tubulin beta-2A chain OS=Homo sapiens GN=TUBB2A PE=1 SV=1 - [TBB2A_HUMAN]	44.94	1	17	341	445	49.875	4.89404				0.897393	1								1.18584	1								0.870706	1								1.06541	1
Q9BVA1	Tubulin beta-2B chain OS=Homo sapiens GN=TUBB2B PE=1 SV=1 - [TBB2B_HUMAN]	44.94	1	17	341	445	49.9209	4.89404							0.993156	1								0.897392	1								1.13537	1								0.999551	1
P53621	Coatomer subunit alpha OS=Homo sapiens GN=COPA PE=1 SV=2 - [COPA_HUMAN]	44.93	49	49	230	1224	138.258	7.66455	0.98395	81	7.47806	0.998866	77	7.40939	0.995698	72	11.6899	1.01321	81	12.6492	0.974437	77	8.31991	1.0585	72	11.7536	0.997019	81	10.3895	1.02749	77	6.96835	0.922425	71	25.5996	0.990229	81	11.351	0.987497	77	8.96638	1.01803	72	10.7774
Q9P287	BRCA2 and CDKN1A-interacting protein OS=Homo sapiens GN=BCCIP PE=1 SV=1 - [BCCIP_HUMAN]	44.9	12	12	42	314	35.9567	4.61475	0.980149	20	10.666	1.03975	10	8.62665	0.952604	12	8.45581	1.06304	20	17.4939	0.983967	10	11.5387	1.0248	12	7.67019	0.959923	20	5.9424	1.06762	10	12.1091	0.843664	12	17.4884	1.00501	20	7.45	0.973097	10	8.46498	1.10976	12	24.4904
Q5CAQ5	Tumor rejection antigen (Gp96) 1 OS=Homo sapiens GN=TRA1 PE=2 SV=1 - [Q5CAQ5_HUMAN]	44.89	37	38	427	802	92.2823	4.85596	0.954478	140	7.86442	1.02343	130	7.28722	1.03407	142	10.6828	1.0473	140	10.6112	0.960632	130	8.17012	0.983166	142	8.92998	0.984576	140	8.41408	1.00947	130	6.74921	1.01014	142	15.7659	1.05305	140	8.75466	0.996378	130	6.44911	0.964948	142	8.97253
K7EKI4	39S ribosomal protein L4, mitochondrial OS=Homo sapiens GN=MRPL4 PE=1 SV=1 - [K7EKI4_HUMAN]	44.88	4	4	13	127	14.0473	7.40088	1.00321	7	2.90431	0.971116	3	0.497223	0.955016	3	5.62402	1.02184	7	6.81916	1.0895	3	1.73843	1.05659	3	8.43152	1.06771	7	15.6789	0.967015	3	2.69253	0.980791	3	1.01481	0.896577	7	10.3297	1.00725	3	3.6602	0.961075	3	0.837854
A8K7F6	cDNA FLJ78244, highly similar to Homo sapiens eukaryotic translation initiation factor 4A, isoform 1 (EIF4A1), mRNA OS=Homo sapiens PE=2 SV=1 - [A8K7F6_HUMAN]	44.83	10	19	237	406	46.0926	5.47803	1.03926	61	9.70367	0.958281	41	6.98009	0.970539	35	12.0257	0.865195	61	14.6297	1.02516	41	10.8236	1.02868	35	5.99082	1.05082	61	6.93961	1.02145	41	9.15834	0.996807	35	12.3277	0.93549	61	13.7939	1.00644	41	8.10499	1.00119	35	10.7886
Q56VL3	OCIA domain-containing protein 2 OS=Homo sapiens GN=OCIAD2 PE=1 SV=1 - [OCAD2_HUMAN]	44.81	7	7	22	154	16.9426	9.02686	1.0055	7	4.87698	1.02527	8	5.35073	1.04075	7	1.8573	0.995631	7	3.93438	1.03472	8	4.72103	0.956721	7	12.5734	1.01075	7	11.6556	0.987275	8	2.28286	1.00825	7	21.5334	1.01237	7	7.99089	0.967928	8	7.58794	0.940717	7	17.9088
L0R4T3	Histone H2B OS=Homo sapiens GN=ABCF2 PE=3 SV=1 - [L0R4T3_HUMAN]	44.78	1	3	199	67	7.30176	8.88037	1.05162	1								0.971281	1								1.02633	1								0.930996	1
P62424	60S ribosomal protein L7a OS=Homo sapiens GN=RPL7A PE=1 SV=2 - [RL7A_HUMAN]	44.74	16	16	113	266	29.977	10.6089	1.05944	39	7.23773	1.07203	34	7.17297	1.02571	40	14.9033	0.910966	39	12.8002	0.873293	34	7.76559	1.06973	40	11.1281	1.07086	39	8.1323	1.11574	34	10.357	0.91881	40	28.4733	0.87115	39	11.0465	0.923145	34	9.27737	1.0066	40	10.4191
P61088	Ubiquitin-conjugating enzyme E2 N OS=Homo sapiens GN=UBE2N PE=1 SV=1 - [UBE2N_HUMAN]	44.74	7	7	38	152	17.127	6.56592	0.998917	9	4.37338	0.966015	14	2.88768	0.955857	15	7.86815	0.996127	9	4.64875	1.03744	14	5.74682	1.00049	15	7.19899	1.07028	9	2.69526	1.00095	14	4.96309	1.03425	15	14.6034	0.928427	9	3.53868	0.98212	14	5.23525	0.988341	15	5.33159
P25705	ATP synthase subunit alpha, mitochondrial OS=Homo sapiens GN=ATP5A1 PE=1 SV=1 - [ATPA_HUMAN]	44.67	23	23	154	553	59.7136	9.12939	0.994286	59	7.92586	1.00424	46	7.91387	0.965691	49	12.3334	1.00046	59	10.2422	1.04133	46	7.27761	1.03227	49	6.51919	0.988276	59	6.56718	0.975673	46	7.10496	1.02831	49	9.25381	1.02535	59	10.3873	1.02332	46	7.37203	0.953291	49	8.36944
Q96FQ6	Protein S100-A16 OS=Homo sapiens GN=S100A16 PE=1 SV=1 - [S10AG_HUMAN]	44.66	4	4	20	103	11.794	6.78564	0.992923	10	12.377	0.981191	6	3.09506	1.03581	4	7.39232	1.04177	10	13.8804	1.0249	6	11.3567	0.969542	4	9.14995	0.954055	10	8.16182	1.01135	6	13.7565	1.01481	4	6.99563	1.02384	10	8.27831	1.01109	6	10.4551	0.981505	4	10.0263
Q9H4A6	Golgi phosphoprotein 3 OS=Homo sapiens GN=GOLPH3 PE=1 SV=1 - [GOLP3_HUMAN]	44.63	9	10	37	298	33.7895	6.44287	0.960573	13	13.2563	0.995896	13	5.17565	1.11781	9	10.8945	1.0362	13	11.6317	0.984401	13	7.15656	0.864152	9	12.5982	0.994742	13	3.80525	1.0487	13	7.59265	1.19307	9	10.9609	1.00552	13	6.18837	0.989006	13	5.77401	0.848798	9	7.5941
B3KS36	cDNA FLJ35376 fis, clone SKMUS2004044, highly similar to Homo sapiens ribosomal protein L3 (RPL3), transcript variant 2, mRNA OS=Homo sapiens PE=2 SV=1 - [B3KS36_HUMAN]	44.63	1	17	96	354	40.1197	10.3013	1.17864	1		1.17599	1					0.872667	1		0.912586	1					1.10098	1		1.00711	1					0.731414	1		0.887748	1
Q14258	E3 ubiquitin/ISG15 ligase TRIM25 OS=Homo sapiens GN=TRIM25 PE=1 SV=2 - [TRI25_HUMAN]	44.6	23	23	102	630	70.9277	8.08936	1.02224	35	11.4343	0.994877	32	7.22385	0.998193	35	12.6412	0.996619	35	13.1808	1.01219	32	8.15181	1.1015	35	8.76201	0.975172	35	9.61539	1.00142	32	9.75049	0.864805	35	17.0222	0.971989	35	14.6896	0.981624	32	6.45854	1.0431	35	8.29514
B2RB23	cDNA, FLJ95265, highly similar to Homo sapiens acetyl-Coenzyme A acyltransferase 2 (mitochondrial 3-oxoacyl-Coenzyme A thiolase) (ACAA2), nuclear gene encoding mitochondrial protein, mRNA OS=Homo sapiens PE=2 SV=1 - [B2RB23_HUMAN]	44.58	14	14	49	397	41.9827	8.25049	0.973504	19	9.0784	0.99507	15	5.4947	1.10262	15	7.50199	1.08716	19	7.18068	1.01812	15	5.95	0.94671	15	9.19332	0.945652	19	8.32845	1.00037	15	7.68875	1.04764	15	12.0534	1.05764	19	7.54161	1.01246	15	7.71964	0.932811	15	10.3317
P46779	60S ribosomal protein L28 OS=Homo sapiens GN=RPL28 PE=1 SV=3 - [RL28_HUMAN]	44.53	8	8	43	137	15.7377	12.0151	1.01593	14	9.72455	1.04247	11	8.90189	0.978625	18	7.97232	0.813214	14	5.71708	0.867061	11	10.8884	1.02747	18	7.35408	1.11316	14	19.6827	1.14782	11	8.40536	1.08624	18	9.75334	0.826008	14	18.2059	0.893212	11	7.59481	0.920817	18	13.6966
B4DWI8	cDNA FLJ57805, highly similar to Homo sapiens paraspeckle component 1 (PSPC1), transcript variant alpha, mRNA OS=Homo sapiens PE=2 SV=1 - [B4DWI8_HUMAN]	44.49	17	18	76	463	52.5461	7.25439	1.00547	24	9.71548	1.00259	20	9.73892	0.944697	27	15.2874	0.938813	24	8.62768	1.01576	20	5.98689	1.0451	27	7.37854	1.03134	24	9.74547	1.02405	20	6.86919	0.907009	27	10.6206	0.980779	24	11.6142	1.02263	20	7.36815	1.05097	27	6.75304
O00515	Ladinin-1 OS=Homo sapiens GN=LAD1 PE=1 SV=2 - [LAD1_HUMAN]	44.49	20	20	74	517	57.0968	9.67139	1.01545	28	7.07701	1.01051	25	9.05225	0.966575	21	7.28048	1.05174	28	11.2436	1.06914	25	8.869	1.00211	21	5.15369	1.00734	28	8.80556	0.952162	25	7.24689	1.01082	21	11.4651	0.958378	28	10.1252	0.979558	25	9.85037	1.0385	21	6.91342
Q14240	Eukaryotic initiation factor 4A-II OS=Homo sapiens GN=EIF4A2 PE=1 SV=2 - [IF4A2_HUMAN]	44.47	8	18	132	407	46.3728	5.47803	0.892849	9	8.92859	0.98428	11	9.30725	1.28883	8	22.4343	1.1769	9	11.5501	0.994546	11	4.32836	0.738465	8	36.5934	0.856345	9	4.3916	1.02459	11	6.81102	1.15082	8	41.622	1.20265	9	8.17834	1.01906	11	3.9756	0.951578	8	4.15928
H0YHM7	Peptidyl-prolyl cis-trans isomerase FKBP11 (Fragment) OS=Homo sapiens GN=FKBP11 PE=1 SV=1 - [H0YHM7_HUMAN]	44.44	1	2	3	63	6.75636	4.55127							0.887817	1								1.02893	1								0.700774	1								1.39414	1
A0A0S2Z4I7	Vasodilator-stimulated phosphoprotein isoform 4 (Fragment) OS=Homo sapiens GN=VASP PE=2 SV=1 - [A0A0S2Z4I7_HUMAN]	44.44	1	12	32	288	31.6498	8.25049	1.02717	2	8.6092	0.897542	1		0.957437	1		0.862123	2	13.2168	0.998761	1		0.827087	1		0.979209	2	10.7689	1.06024	1		1.14968	1		1.11994	2	11.1189	1.0573	1		1.1127	1
A0A087WXM6	60S ribosomal protein L17 (Fragment) OS=Homo sapiens GN=RPL17 PE=3 SV=1 - [A0A087WXM6_HUMAN]	44.38	7	8	82	169	19.5732	10.0376	1.07679	33	6.80576	1.11494	22	7.38867	1.03954	21	9.67855	0.907506	33	19.5722	0.855779	22	7.46135	1.07052	21	7.43203	1.12163	33	12.3217	1.16711	22	7.51328	0.785808	21	27.2897	0.778269	33	14.0084	0.860508	22	13.4741	0.99782	21	14.6324
Q96C36	Pyrroline-5-carboxylate reductase 2 OS=Homo sapiens GN=PYCR2 PE=1 SV=1 - [P5CR2_HUMAN]	44.38	10	11	48	320	33.6157	7.76709	1.02652	11	7.75725	1.05586	11	10.4547	1.01	13	10.0252	1.01668	11	13.5776	0.982462	11	10.5379	1.02475	13	10.484	1.00668	11	10.7361	1.02018	11	7.65104	0.879809	13	16.4188	0.953784	11	7.40478	0.945585	11	9.55412	1.10758	13	14.3403
P15880	40S ribosomal protein S2 OS=Homo sapiens GN=RPS2 PE=1 SV=2 - [RS2_HUMAN]	44.37	10	15	161	293	31.3046	10.2427	1.0996	42	12.155	1.05747	43	7.94447	1.00868	42	10.2686	0.842066	42	16.9257	0.863904	43	8.71645	1.0645	42	7.19586	1.11129	42	7.34978	1.09221	43	8.87992	0.926174	42	12.5116	0.885484	42	12.5587	0.957997	43	9.91102	0.984629	42	11.247
P47895	Aldehyde dehydrogenase family 1 member A3 OS=Homo sapiens GN=ALDH1A3 PE=1 SV=2 - [AL1A3_HUMAN]	44.34	16	24	168	512	56.0728	7.25439	1.01217	54	5.79714	0.890936	32	9.08593	0.841117	29	13.9449	0.927053	54	10.5513	0.986478	32	5.61008	1.05966	29	8.67051	1.02066	54	8.42983	1.06463	32	8.07809	1.07661	29	15.1259	1.02524	54	11.1638	1.09524	32	4.54817	0.989544	29	13.2309
Q15785	Mitochondrial import receptor subunit TOM34 OS=Homo sapiens GN=TOMM34 PE=1 SV=2 - [TOM34_HUMAN]	44.34	11	12	34	309	34.5378	8.98291	0.992555	12	6.44092	1.0218	9	9.78126	0.980551	12	14.8402	0.995011	12	9.95358	0.994262	9	7.99024	1.02998	12	5.00498	1.01965	12	5.47395	0.980821	9	5.79526	0.909772	12	18.0068	0.992117	12	9.32517	0.997454	9	6.94417	1.08002	12	12.7532
P40925	Malate dehydrogenase, cytoplasmic OS=Homo sapiens GN=MDH1 PE=1 SV=4 - [MDHC_HUMAN]	44.31	15	15	98	334	36.403	7.35693	0.978623	39	9.28031	0.948888	27	8.83953	0.972957	31	9.70551	1.03059	39	9.11398	1.01946	27	12.825	1.0153	31	14.2726	1.02073	39	9.02612	1.0477	27	11.8234	1.0623	31	11.1809	1.00265	39	11.5389	0.975849	27	10.8074	0.993059	31	9.2965
P12236	ADP/ATP translocase 3 OS=Homo sapiens GN=SLC25A6 PE=1 SV=4 - [ADT3_HUMAN]	44.3	2	14	154	298	32.8452	9.74463	1.08182	10	7.29397	0.958398	3	9.09105	0.897297	4	1.55793	0.932299	10	10.5283	1.08465	3	0.167259	1.20903	4	2.49196	1.01999	10	5.12883	0.951873	3	3.42574	0.774479	4	18.6744	0.893984	10	8.35903	0.996417	3	10.2916	1.06269	4	7.55618
B4DF70	cDNA FLJ60461, highly similar to Peroxiredoxin-2 (EC 1.11.1.15) OS=Homo sapiens PE=2 SV=1 - [B4DF70_HUMAN]	44.26	9	10	111	183	20.0946	8.77783	0.926355	36	11.2111	0.997151	24	9.88817	1.04286	31	12.4497	1.12946	36	11.3018	1.01596	24	8.31109	0.990203	31	10.706	0.958383	36	9.10885	0.96397	24	6.90857	1.02494	31	20.7787	1.06226	36	10.3278	0.993644	24	9.90121	1.01048	31	11.5925
O43324	Eukaryotic translation elongation factor 1 epsilon-1 OS=Homo sapiens GN=EEF1E1 PE=1 SV=1 - [MCA3_HUMAN]	44.25	8	8	23	174	19.7983	8.54346	1.01565	10	4.70982	1.0449	4	4.0137	0.933552	9	6.5243	0.96664	10	14.746	0.91196	4	5.13057	1.02587	9	14.2649	1.05961	10	6.27279	1.07522	4	7.05459	0.873404	9	10.1917	0.969761	10	13.4329	0.962666	4	13.6188	1.06912	9	13.1279
A0A0S2Z472	Protein kinase cAMP-dependent regulatory type II alpha isoform 1 (Fragment) OS=Homo sapiens GN=PRKAR2A PE=2 SV=1 - [A0A0S2Z472_HUMAN]	44.24	13	13	49	382	43.0397	5.08447	1.00178	15	4.98771	0.98277	15	6.98623	0.968198	19	9.00461	0.980102	15	8.24775	1.04893	15	7.41273	1.04243	19	9.09372	1.01593	15	5.28362	0.993726	15	4.71496	0.95119	19	13.4849	0.994134	15	16.6745	0.961612	15	6.16688	1.10281	19	6.45715
Q96I24	Far upstream element-binding protein 3 OS=Homo sapiens GN=FUBP3 PE=1 SV=2 - [FUBP3_HUMAN]	44.23	17	21	82	572	61.6022	8.38232	1.01547	23	6.78729	0.9971	16	3.98946	0.958207	17	8.05825	1.0168	23	13.9138	0.984565	16	8.58283	1.00069	17	7.81208	0.972802	23	7.73572	1.00106	16	7.78561	1.02773	17	12.1845	1.07013	23	15.3966	1.00952	16	4.6461	1.014	17	9.28194
E7D7X9	Pyrroline-5-carboxylate reductase OS=Homo sapiens PE=2 SV=1 - [E7D7X9_HUMAN]	44.2	9	10	85	319	33.3696	7.60596	1.04254	27	4.74965	1.04878	22	8.63289	0.962159	23	10.0025	0.928195	27	9.55524	0.948464	22	10.6645	1.07496	23	8.34726	1.07233	27	4.58733	1.02565	22	9.23226	0.926678	23	10.4098	0.909996	27	12.3293	0.969471	22	12.4952	1.03837	23	11.4889
P13693	Translationally-controlled tumor protein OS=Homo sapiens GN=TPT1 PE=1 SV=1 - [TCTP_HUMAN]	44.19	8	8	61	172	19.5826	4.93213	1.04603	24	9.62415	0.956801	19	15.2834	0.856717	18	16.9361	0.940578	24	12.6315	0.962584	19	10.1543	1.04104	18	11.4072	1.07132	24	10.8258	1.01461	19	8.8917	0.952995	18	19.2654	0.933864	24	12.9489	1.05212	19	12.9715	1.01759	18	14.5287
P39023	60S ribosomal protein L3 OS=Homo sapiens GN=RPL3 PE=1 SV=2 - [RL3_HUMAN]	44.17	5	21	108	403	46.0798	10.1841	1.07762	6	7.08533	1.15014	4	2.46837	1.01055	4	9.02423	0.894824	6	13.0085	0.928141	4	5.00352	1.02178	4	5.23807	1.07777	6	11.8714	1.0319	4	4.68595	1.00741	4	17.9713	0.862519	6	14.9005	0.87536	4	0.382216	0.952791	4	3.15193
E5RJR5	S-phase kinase-associated protein 1 OS=Homo sapiens GN=SKP1 PE=1 SV=1 - [E5RJR5_HUMAN]	44.17	9	9	28	163	18.7083	4.70361	1.05497	10	8.62121	0.941823	9	11.1493	0.934839	9	3.36511	0.970981	10	11.8437	1.05416	9	7.12872	0.951315	9	7.86595	1.00502	10	6.53601	1.02696	9	1.63166	1.13857	9	10.0272	1.00488	10	5.70823	1.01175	9	3.61202	0.96236	9	3.36408
P31930	Cytochrome b-c1 complex subunit 1, mitochondrial OS=Homo sapiens GN=UQCRC1 PE=1 SV=3 - [QCR1_HUMAN]	44.17	14	14	73	480	52.6124	6.3667	1.00145	27	7.36961	0.983593	23	7.62329	1.02722	23	11.3175	0.939582	26	14.4546	0.999776	23	6.86141	0.982865	23	7.24877	1.06594	27	9.24621	1.02294	23	4.54395	1.0599	23	18.5268	0.976145	26	10.9578	1.01472	23	6.59644	1.00415	23	16.0704
A0A087WYR0	Signal recognition particle 19 kDa protein OS=Homo sapiens GN=SRP19 PE=1 SV=1 - [A0A087WYR0_HUMAN]	44.17	4	4	13	120	13.6452	10.228	1.00574	6	3.20069	0.967252	3	7.68877	0.93456	4	6.5516	0.923114	6	14.2456	0.993376	3	2.696	1.15226	4	5.16683	1.06276	6	5.62801	1.0314	3	1.02086	0.793739	4	19.1286	0.983679	6	12.3861	1.01471	3	4.32106	1.12749	4	8.85569
Q96C19	EF-hand domain-containing protein D2 OS=Homo sapiens GN=EFHD2 PE=1 SV=1 - [EFHD2_HUMAN]	44.17	10	11	54	240	26.6805	5.19873	0.976327	17	4.89535	0.950955	17	9.08237	0.9447	18	7.07582	1.04729	17	4.64112	1.07289	17	6.9405	1.02244	18	6.8268	1.01299	17	5.34369	0.961815	17	4.41789	1.02568	18	14.6141	0.988241	17	4.91613	1.01494	17	3.61851	0.975892	18	7.95039
Q9Y3I0	tRNA-splicing ligase RtcB homolog OS=Homo sapiens GN=RTCB PE=1 SV=1 - [RTCB_HUMAN]	44.16	21	21	107	505	55.1749	7.2251	1.02203	46	9.29042	0.967299	30	6.43424	0.916866	30	10.7399	0.944423	46	10.3585	1.0334	30	5.4548	1.09923	31	10.9434	1.03605	46	9.12755	1.0073	30	4.47953	0.895808	31	18.1873	0.930286	46	11.4767	1.00097	30	4.67143	1.07823	31	8.97869
A0A0C4DGB5	Calpastatin OS=Homo sapiens GN=CAST PE=1 SV=1 - [A0A0C4DGB5_HUMAN]	44.16	30	30	101	754	80.9502	5.09717	1.06365	34	6.81516	1.0097	32	7.51156	0.940628	35	8.17973	0.941008	34	9.06408	1.05993	32	5.60655	1.04726	35	7.90646	1.04314	34	6.15858	0.946188	32	7.39331	0.95959	35	13.6687	0.902149	34	12.4961	0.967748	32	6.99854	1.04409	35	7.58097
P26641	Elongation factor 1-gamma OS=Homo sapiens GN=EEF1G PE=1 SV=3 - [EF1G_HUMAN]	44.16	23	23	246	437	50.0871	6.66846	0.998249	91	7.75417	0.958766	75	10.215	0.890679	80	9.90767	0.951805	91	14.6996	1.0204	75	14.0408	1.10159	80	8.36865	1.02852	91	12.4783	0.991934	75	14.7556	0.878448	80	20.2305	0.96728	91	17.0896	1.00099	75	12.2693	1.10512	80	14.7466
Q99598	Translin-associated protein X OS=Homo sapiens GN=TSNAX PE=1 SV=1 - [TSNAX_HUMAN]	44.14	11	11	26	290	33.0917	6.55127	0.97634	7	4.97299	0.887093	9	9.32703	0.911218	10	13.3686	0.918423	7	7.02324	1.04683	9	8.72521	1.08269	10	5.72289	1.10223	7	9.17061	1.02577	9	2.87782	0.981228	10	22.4288	0.980793	7	5.31089	1.05602	9	3.14	1.0173	10	15.0676
Q9BRP8	Partner of Y14 and mago OS=Homo sapiens GN=PYM1 PE=1 SV=1 - [PYM1_HUMAN]	44.12	7	7	17	204	22.642	9.45166	1.00378	4	1.21279	1.0255	7	3.66599	0.906734	6	5.52889	1.06334	4	7.85287	1.00998	7	8.42382	0.952606	6	5.29827	0.974215	4	2.30988	0.984058	7	5.83314	1.10939	6	7.11473	0.969058	4	5.01999	1.01352	7	9.42083	1.04608	6	2.96385
B3KM36	cDNA FLJ10153 fis, clone HEMBA1003417, highly similar to BAG family molecular chaperone regulator 2 OS=Homo sapiens PE=2 SV=1 - [B3KM36_HUMAN]	44.08	9	9	44	211	23.6972	6.69775	0.970075	18	11.6321	0.992228	10	5.34471	1.01584	16	6.89226	1.00501	18	10.4501	1.03586	10	4.40299	0.974087	16	5.77985	0.960509	18	9.89474	1.00232	10	7.40758	1.11653	16	12.2945	1.02437	18	7.70628	0.991179	10	4.85496	0.931885	16	7.04602
Q53GG0	Epithelial protein lost in neoplasm beta variant (Fragment) OS=Homo sapiens PE=2 SV=1 - [Q53GG0_HUMAN]	44.01	24	31	116	759	85.2014	6.84424	0.976602	26	8.28922	0.984433	35	7.26692	0.910222	28	12.4596	0.959816	26	7.39565	1.02072	35	9.8236	1.02559	28	6.17424	1.06446	26	7.37585	1.01961	35	8.12106	1.02674	28	10.409	0.93416	26	9.34656	0.969682	35	8.6233	1.03008	28	10.973
P23526	Adenosylhomocysteinase OS=Homo sapiens GN=AHCY PE=1 SV=4 - [SAHH_HUMAN]	43.98	4	19	107	432	47.6852	6.34131	0.971519	14	9.95253	0.916168	8	4.46862	0.964712	12	7.41344	0.996338	14	13.5259	1.07544	8	7.94059	1.0757	12	9.79201	1.06401	14	7.57264	1.01812	8	8.50192	0.920328	12	13.624	0.964421	14	14.9116	1.00192	8	11.9641	1.04354	12	9.94568
Q9UJU1	Cytovillin 2 (Fragment) OS=Homo sapiens GN=VIL2 PE=2 SV=1 - [Q9UJU1_HUMAN]	43.97	1	10	52	141	16.23	9.30518	1.08747	1								0.985433	1								0.985011	1								0.924621	1
P61006	Ras-related protein Rab-8A OS=Homo sapiens GN=RAB8A PE=1 SV=1 - [RAB8A_HUMAN]	43.96	5	8	53	207	23.6532	9.0708	1.02653	6	4.58488	0.946954	3	2.89925	1.00529	3	7.63698	0.952357	6	20.6562	1.01945	3	0.473803	1.02742	3	2.89154	1.03595	6	10.7235	0.942564	3	2.36573	1.03825	3	14.1018	0.985913	6	2.91573	1.07429	3	3.18903	0.965616	3	18.1676
B5BU78	Protein tyrosine phosphatase type IVA protein 1 OS=Homo sapiens GN=PTP4A1 PE=2 SV=1 - [B5BU78_HUMAN]	43.93	3	6	20	173	19.7742	8.96826	0.993085	4	0.894698	1.02099	4	1.94481	0.746728	7	34.2373	1.31848	4	1.72611	1.19129	4	6.72789	1.34597	7	21.1737	0.940411	4	3.12413	0.887374	4	5.14837	0.459748	7	37.7409	0.859362	4	23.059	0.940941	4	8.30728	1.33835	7	7.59462
P04350	Tubulin beta-4A chain OS=Homo sapiens GN=TUBB4A PE=1 SV=2 - [TBB4A_HUMAN]	43.92	1	16	373	444	49.5539	4.88135	0.898382	11	10.7466	1.10239	6	3.04953	1.26201	5	5.98493	1.15432	11	9.41507	0.976413	6	5.6817	1.07599	5	9.83947	0.999629	11	8.45053	1.03569	6	5.24682	0.595573	5	38.6655	1.01227	11	17.853	0.904972	6	6.86778	1.25227	5	7.10993
P23919	Thymidylate kinase OS=Homo sapiens GN=DTYMK PE=1 SV=4 - [KTHY_HUMAN]	43.87	10	10	19	212	23.8045	8.26514	1.00131	8	5.65271	0.960796	7	5.34902	1.04125	4	5.50089	1.04442	8	3.43176	1.0346	7	5.71784	0.971369	4	1.30975	0.951449	8	6.59812	1.00935	7	9.96768	1.09959	4	1.11075	1.04025	8	7.88151	1.02528	7	3.85288	0.921176	4	7.09124
H0Y4R1	Inosine-5'-monophosphate dehydrogenase 2 (Fragment) OS=Homo sapiens GN=IMPDH2 PE=1 SV=1 - [H0Y4R1_HUMAN]	43.83	18	19	122	470	51.0352	8.17725	1.00698	47	7.22843	0.973103	36	8.11405	0.917558	36	6.11471	0.938307	47	7.54804	1.06047	36	6.80109	1.12453	36	10.5835	1.05686	47	7.58915	0.958464	36	7.23746	0.872661	36	22.3093	0.96483	47	9.84312	1.01249	36	6.37782	1.0998	36	6.87908
F8W950	Aminoacyl tRNA synthase complex-interacting multifunctional protein 2 OS=Homo sapiens GN=AIMP2 PE=1 SV=1 - [F8W950_HUMAN]	43.82	10	10	52	251	27.7914	9.31982	0.957418	25	11.0011	1.00636	13	15.3079	0.888826	14	17.5012	1.00379	25	16.3615	1.00442	13	10.9873	1.00436	14	10.7527	1.02809	25	7.77418	0.993898	13	6.96139	0.971227	14	12.8686	1.00896	25	9.49827	1.01075	13	11.9274	1.03038	14	6.77179
P48735	Isocitrate dehydrogenase [NADP], mitochondrial OS=Homo sapiens GN=IDH2 PE=1 SV=2 - [IDHP_HUMAN]	43.81	17	18	58	452	50.8769	8.68994	0.95542	18	5.99865	1.00505	16	10.5587	1.00636	20	5.09661	1.04984	18	11.5967	1.00761	16	11.9515	1.0375	20	8.06831	1.01286	18	5.47629	0.97466	16	6.14154	0.915612	20	27.6003	1.02796	18	9.59793	1.02146	16	8.9983	1.00625	20	14.2307
Q2MJK0	P16 protein (Fragment) OS=Homo sapiens GN=CDKN2A PE=4 SV=1 - [Q2MJK0_HUMAN]	43.75	1	1	1	48	5.06554	6.59521	0.839682	1								1.03431	1								0.851424	1								1.42755	1
Q96KK5	Histone H2A type 1-H OS=Homo sapiens GN=HIST1H2AH PE=1 SV=3 - [H2A1H_HUMAN]	43.75	3	8	341	128	13.8978	10.8872	0.901064	75	12.5821	1.33431	91	11.1553	0.910053	100	19.7463	1.22067	75	11.6169	0.800043	91	11.8276	1.1669	104	11.8987	1.10045	76	10.3757	1.14452	91	6.76912	0.336152	95	94.9736	0.799655	76	17.6654	0.698513	91	17.3574	1.59449	102	17.5325
Q53G19	Mitochondrial ribosomal protein L11 isoform a variant (Fragment) OS=Homo sapiens PE=2 SV=1 - [Q53G19_HUMAN]	43.75	7	7	25	192	20.6424	9.90576	0.96216	8	7.58916	0.967804	7	7.91657	1.00405	10	8.46134	1.00144	8	9.43952	1.02392	7	5.88561	0.981297	10	6.36423	1.00821	8	11.8449	0.979834	7	2.41823	0.916207	10	18.5446	1.07767	8	8.2015	0.996917	7	7.15472	1.02029	10	17.1528
Q9NPE3	H/ACA ribonucleoprotein complex subunit 3 OS=Homo sapiens GN=NOP10 PE=1 SV=1 - [NOP10_HUMAN]	43.75	2	2	5	64	7.70097	9.99365	1.09789	2	1.41398	1.04058	1		0.883552	2	10.5988	0.913434	2	1.41711	1.0641	1		1.03998	2	15.3163	1.07481	2	5.31636	1.04008	1		0.802541	2	47.1508	0.8465	2	5.49138	0.860563	1		1.22108	2	7.7631
P19338	Nucleolin OS=Homo sapiens GN=NCL PE=1 SV=3 - [NUCL_HUMAN]	43.66	38	38	341	710	76.5684	4.70361	1.08512	116	8.03302	0.983246	111	10.3009	0.889641	114	12.9624	0.908958	116	11.7894	1.02785	111	8.45397	1.08843	114	10.2955	1.06476	116	7.78909	1.00376	111	11.0043	0.948226	114	12.607	0.894846	116	16.2543	0.988277	110	9.26036	1.05823	114	9.57266
P37268	Squalene synthase OS=Homo sapiens GN=FDFT1 PE=1 SV=1 - [FDFT_HUMAN]	43.65	16	16	104	417	48.0842	6.53662	0.898721	27	12.8876	1.01853	42	6.21513	1.34763	35	16.1553	1.16353	27	12.7367	0.904913	42	9.15879	0.717856	35	25.0571	0.872869	27	9.97113	1.04921	42	6.77437	1.21385	35	29.6086	1.19561	27	10.2457	0.990435	42	7.37463	0.706728	35	21.0803
P10768	S-formylglutathione hydrolase OS=Homo sapiens GN=ESD PE=1 SV=2 - [ESTD_HUMAN]	43.62	9	9	34	282	31.4425	7.02002	0.926412	13	14.8966	0.990943	12	4.40596	0.990568	9	6.97401	1.05093	13	10.5336	1.05045	12	8.36098	1.00499	9	10.5762	1.001	13	3.71788	0.953063	12	6.46448	0.999539	9	13.514	1.07759	13	12.8666	1.01498	12	7.77498	1.02311	9	13.6384
B7Z475	cDNA FLJ55712, highly similar to F-box-like/WD repeat protein TBL1XR1 OS=Homo sapiens PE=2 SV=1 - [B7Z475_HUMAN]	43.62	12	12	26	376	40.7308	6.82959	1.03219	10	6.12528	0.996227	7	3.97528	0.93674	9	5.11901	0.985359	10	7.38397	0.993464	7	4.1301	1.00257	9	1.22958	0.978132	10	10.9578	0.987359	7	3.7795	0.938407	9	11.6917	1.01194	10	14.0756	0.979321	7	5.70304	1.03187	9	11.3202
P62750	60S ribosomal protein L23a OS=Homo sapiens GN=RPL23A PE=1 SV=1 - [RL23A_HUMAN]	43.59	11	11	75	156	17.6841	10.4478	1.12535	27	8.61717	1.0493	23	7.19536	0.954937	25	9.53279	0.78092	27	13.167	0.880794	23	9.08054	1.00543	25	11.9409	1.16817	27	14.6021	1.12134	23	10.4269	1.06946	25	11.1253	0.77571	27	12.2933	0.918009	23	6.81105	0.927396	25	9.19102
P27824	Calnexin OS=Homo sapiens GN=CANX PE=1 SV=2 - [CALX_HUMAN]	43.58	19	27	196	592	67.5259	4.60205	0.987735	46	8.68113	1.03346	44	10.0734	1.02407	36	17.6857	1.04629	46	19.5661	0.945682	44	12.1204	1.01126	36	10.8054	0.987329	46	8.2991	1.02849	44	12.6224	0.982732	36	10.3971	0.969194	46	12.144	0.949133	44	13.8068	0.969852	36	13.2569
P28066	Proteasome subunit alpha type-5 OS=Homo sapiens GN=PSMA5 PE=1 SV=3 - [PSA5_HUMAN]	43.57	8	8	80	241	26.3942	4.79248	0.979956	35	10.2115	0.972609	21	7.41792	0.948999	24	11.3686	0.95877	35	13.8987	0.982038	21	11.1559	1.03978	24	11.1427	1.01205	35	9.89283	0.97072	21	12.1434	0.95424	24	10.9849	0.988668	35	10.9843	1.06866	21	8.86821	1.00397	24	10.7953
P24752	Acetyl-CoA acetyltransferase, mitochondrial OS=Homo sapiens GN=ACAT1 PE=1 SV=1 - [THIL_HUMAN]	43.56	17	17	78	427	45.1706	8.85107	0.992014	28	8.94868	1.039	30	9.88277	0.924784	20	11.5406	1.00957	28	14.2994	1.00678	30	11.8931	1.00896	20	9.03137	1.01749	28	10.3983	0.965494	30	12.4015	0.936272	20	31.2892	0.968235	28	9.79884	0.973706	30	11.0188	1.13569	20	22.0038
P18124	60S ribosomal protein L7 OS=Homo sapiens GN=RPL7 PE=1 SV=1 - [RL7_HUMAN]	43.55	16	17	116	248	29.2072	10.6528	1.07157	45	10.5674	1.09212	31	7.53082	1.03848	39	12.1604	0.859181	45	17.2382	0.873923	31	10.2343	0.984457	39	16.8837	1.13174	45	12.655	1.10896	31	11.5739	1.06114	39	16.3005	0.855871	45	23.1841	0.903064	31	10.2702	0.94906	39	8.12618
P26196	Probable ATP-dependent RNA helicase DDX6 OS=Homo sapiens GN=DDX6 PE=1 SV=2 - [DDX6_HUMAN]	43.48	16	17	65	483	54.3823	8.66064	1.0044	23	7.89388	0.965931	17	9.26447	1.10641	19	13.1146	0.92604	23	15.3495	0.998496	17	10.3787	0.998977	19	15.454	1.0273	23	9.65413	1.02565	17	6.77768	1.0591	19	16.3956	1.00575	23	6.37796	1.02229	17	5.37702	0.946616	19	16.6171
Q5HYL6	Putative uncharacterized protein DKFZp686E1899 OS=Homo sapiens GN=DKFZp686E1899 PE=2 SV=1 - [Q5HYL6_HUMAN]	43.47	14	14	56	352	39.5302	5.18604	1.02168	19	6.57246	0.97853	17	6.77909	0.991306	20	9.76015	1.01933	19	8.93906	0.993355	17	9.98785	1.0012	20	7.11638	0.97287	19	13.2848	1.00683	17	8.321	0.9423	20	12.3186	0.994926	19	13.6517	1.01281	17	7.24782	1.03519	20	13.1312
Q6IPN0	Reticulon OS=Homo sapiens GN=RTN4 PE=2 SV=1 - [Q6IPN0_HUMAN]	43.44	4	9	44	343	36.8953	4.80518	0.893404	8	13.1242	0.997371	3	0.67596	0.930084	6	9.56792	1.24232	8	25.3705	1.00332	3	2.31374	0.985277	6	10.7895	0.95243	8	9.17022	1.04048	3	0.619833	0.959885	6	16.7488	1.17563	7	5.85363	1.01878	3	6.73448	1.13702	6	2.51923
P38606	V-type proton ATPase catalytic subunit A OS=Homo sapiens GN=ATP6V1A PE=1 SV=2 - [VATA_HUMAN]	43.44	23	23	104	617	68.2605	5.51611	0.951809	34	6.92652	0.965345	34	9.32003	0.997628	36	11.5164	1.03437	34	11.0433	0.995648	34	8.27384	0.999937	36	13.4843	0.98748	34	5.82231	1.03592	34	8.99253	0.951395	36	19.9327	1.06525	34	7.939	1.01285	34	5.82631	1.04338	36	16.0076
E9PN17	ATP synthase subunit g, mitochondrial OS=Homo sapiens GN=ATP5L PE=1 SV=1 - [E9PN17_HUMAN]	43.42	3	3	20	76	8.44668	10.2866	0.911344	8	11.088	1.0119	6	4.22196	1.03454	6	16.0025	0.999389	8	17.5384	0.988093	6	9.79974	0.99795	6	5.15661	0.978104	8	6.70281	1.02846	6	10.4466	1.03522	6	7.0343	1.16901	8	4.07179	0.966121	6	3.04309	0.909001	6	23.6097
Q9Y376	Calcium-binding protein 39 OS=Homo sapiens GN=CAB39 PE=1 SV=1 - [CAB39_HUMAN]	43.4	14	14	46	341	39.8437	6.88818	0.960192	17	8.32791	0.924901	13	13.2638	1.04075	11	11.8459	1.0325	17	11.2609	1.01711	13	6.69474	1.04629	11	10.0274	0.947293	17	6.83267	1.02078	13	4.68652	0.902947	11	21.4689	1.03863	17	8.55233	1.03278	13	4.16657	0.989762	11	5.98386
Q6PIU2	Neutral cholesterol ester hydrolase 1 OS=Homo sapiens GN=NCEH1 PE=1 SV=3 - [NCEH1_HUMAN]	43.38	15	15	103	408	45.7787	7.2251	0.992715	31	7.54047	0.987037	34	8.30808	1.00276	38	13.2134	1.0048	31	12.0869	1.0418	34	7.52054	1.04152	38	10.2998	0.947749	31	7.62419	0.965704	34	6.85819	0.960553	38	19.6683	1.06366	31	6.60351	1.01605	34	5.62797	0.991101	38	14.9285
P28838	Cytosol aminopeptidase OS=Homo sapiens GN=LAP3 PE=1 SV=3 - [AMPL_HUMAN]	43.35	19	19	51	519	56.1308	7.92822	1.03503	23	8.77214	0.979876	11	5.67876	0.895451	17	11.5989	0.932363	23	16.0157	1.00695	11	13.918	1.06326	17	13.38	1.04098	23	5.87814	1.05342	11	13.2029	0.930192	17	7.92573	0.954924	23	14.4635	1.02995	11	18.734	1.05648	17	7.86113
B5LY71	Uridine monophosphate synthetase isoform I OS=Homo sapiens GN=UMPS PE=2 SV=1 - [B5LY71_HUMAN]	43.33	18	18	56	480	52.2436	7.23975	1.0046	17	12.1392	1.01012	18	9.01013	1.01411	21	9.22031	1.02418	17	12.2827	1.01752	18	4.43221	1.06882	21	8.51072	0.977338	17	6.30771	0.998608	18	11.1615	0.87874	21	17.6345	0.982762	17	9.77754	0.959744	18	6.2955	1.04512	21	12.8431
P52209	6-phosphogluconate dehydrogenase, decarboxylating OS=Homo sapiens GN=PGD PE=1 SV=3 - [6PGD_HUMAN]	43.27	5	21	138	483	53.106	7.2251	0.870098	14	7.87609	0.925901	22	8.6564	0.970074	12	11.3124	1.12856	14	9.69157	0.978463	22	8.85005	0.946783	12	6.96407	0.916919	14	11.5478	1.04825	22	8.07352	1.18911	12	11.8508	1.17991	14	5.90496	1.04428	22	7.6708	0.889301	12	15.5456
V9GY60	ATP-dependent DNA helicase Q4 (Fragment) OS=Homo sapiens GN=RECQL4 PE=1 SV=1 - [V9GY60_HUMAN]	43.24	1	1	1	37	3.90577	8.22119	0.930535	1								1.13898	1								0.933731	1								1.0845	1
Q59F44	Cytochrome b-5 isoform 1 variant (Fragment) OS=Homo sapiens PE=2 SV=1 - [Q59F44_HUMAN]	43.18	4	4	16	132	14.5631	5.71924	0.961122	6	8.24859	0.994875	5	3.51673	1.1416	5	0.228007	1.06774	6	8.10076	1.00022	5	3.40759	1.03726	5	0.943891	1.01316	6	4.75925	1.02874	5	2.07529	1.01543	5	13.9923	1.00207	6	14.6054	0.973765	5	5.97312	0.884019	5	7.68011
P09110	3-ketoacyl-CoA thiolase, peroxisomal OS=Homo sapiens GN=ACAA1 PE=1 SV=2 - [THIK_HUMAN]	43.16	13	13	42	424	44.2639	8.44092	0.952632	14	5.78191	0.999588	14	3.76829	0.987331	14	9.45385	1.04263	14	10.6764	1.05093	14	3.69778	1.08902	14	5.82876	1.01777	14	4.91351	0.967033	14	4.83158	0.825126	14	17.8979	0.978648	14	8.30242	0.968787	14	5.75249	1.08955	14	6.30047
H7BYY1	Tropomyosin 1 (Alpha), isoform CRA_m OS=Homo sapiens GN=TPM1 PE=1 SV=1 - [H7BYY1_HUMAN]	43.15	7	13	54	248	28.7296	4.81787	1.10022	2	5.20311	0.952749	7	6.32039	0.887964	6	3.99719	0.878511	2	8.40888	1.07535	7	11.1278	1.03169	6	2.52394	1.03979	2	2.64744	0.995587	7	7.60147	1.06923	6	8.75977	0.923429	2	2.5148	0.980195	7	6.55592	0.963842	6	5.02966
P20618	Proteasome subunit beta type-1 OS=Homo sapiens GN=PSMB1 PE=1 SV=2 - [PSB1_HUMAN]	43.15	8	8	62	241	26.4724	8.1333	1.00754	26	6.42764	0.974353	17	7.07898	0.978981	19	11.186	0.990527	26	8.0969	1.0321	17	5.96137	1.04445	19	5.85068	0.982588	26	5.78847	0.999749	17	9.09656	0.984092	19	11.2127	1.02424	26	11.5758	0.992309	17	7.95723	1.04503	19	14.3756
B2R5B6	Histone H2A OS=Homo sapiens PE=2 SV=1 - [B2R5B6_HUMAN]	43.08	3	8	84	130	14.129	10.9019	0.937659	3	15.7053	1.13905	8	7.51544	1.30353	3	6.7004	1.12507	3	2.78951	0.871757	8	25.9713	0.851245	3	14.3923	1.07893	3	1.00616	1.13793	8	27.6122	0.896993	3	9.32515	0.990404	3	9.38684	0.803059	8	18.4282	1.07113	3	14.5282
Q13242	Serine/arginine-rich splicing factor 9 OS=Homo sapiens GN=SRSF9 PE=1 SV=1 - [SRSF9_HUMAN]	42.99	10	10	42	221	25.5264	8.646	0.982359	16	5.91993	0.962918	11	7.91835	0.939649	15	8.51005	0.98867	16	5.88643	1.01907	11	10.3605	0.977424	15	4.87105	0.975456	16	6.55728	0.989799	11	7.18385	1.06607	15	16.6101	1.02937	16	6.2414	1.01508	11	8.8175	0.987242	15	6.25058
O60362	Putative uncharacterized protein 44M2.1 OS=Homo sapiens GN=44M2.1 PE=4 SV=1 - [O60362_HUMAN]	42.98	11	11	26	242	27.293	8.88037	1.03151	10	3.8942	1.00924	6	5.71446	0.919539	10	9.50578	0.95104	10	16.342	1.09775	6	5.33189	1.11679	10	5.54304	1.06273	10	8.63846	0.903139	6	1.9234	0.930549	10	13.8297	0.925372	10	9.94336	0.995844	6	6.46082	0.995367	10	7.85336
P25685	DnaJ homolog subfamily B member 1 OS=Homo sapiens GN=DNAJB1 PE=1 SV=4 - [DNJB1_HUMAN]	42.94	12	13	40	340	38.0204	8.63135	0.947385	11	4.15281	0.976967	11	3.50294	0.991862	15	7.31005	1.06699	11	6.46446	0.97933	11	4.65752	0.980372	15	9.7223	0.972497	11	7.63883	1.0412	11	7.43625	1.05161	15	12.2409	1.06603	11	8.96895	0.992821	11	2.74767	0.972033	15	3.96285
E5RHW4	Erlin-2 (Fragment) OS=Homo sapiens GN=ERLIN2 PE=1 SV=1 - [E5RHW4_HUMAN]	42.9	10	13	35	338	37.7014	5.61768	0.941561	10	7.58296	0.975256	5	5.04821	0.912645	10	8.23052	1.0052	10	3.7324	0.998733	5	8.38944	1.03081	10	6.79296	1.02878	10	11.3275	1.01238	5	2.13877	1.06137	10	9.22361	1.07368	10	12.5978	1.02249	5	3.55776	0.972105	10	12.2965
P49748	Very long-chain specific acyl-CoA dehydrogenase, mitochondrial OS=Homo sapiens GN=ACADVL PE=1 SV=1 - [ACADV_HUMAN]	42.9	9	22	87	655	70.3454	8.74854	0.933665	14	6.23918	1.01091	13	4.02815	1.01614	13	3.71547	1.08334	14	6.75628	1.02954	13	8.70831	0.993341	13	13.2256	0.940637	14	7.51042	0.954706	13	3.33434	0.991345	13	24.7371	1.13997	14	8.53751	1.00137	13	5.33475	0.99814	13	5.94801
O15372	Eukaryotic translation initiation factor 3 subunit H OS=Homo sapiens GN=EIF3H PE=1 SV=1 - [EIF3H_HUMAN]	42.9	15	15	41	352	39.9051	6.53662	1.06058	15	9.72784	0.999553	15	7.8408	1.09314	11	6.05507	0.929368	15	14.9804	1.01101	15	5.63145	0.91595	11	4.52502	1.02412	15	4.09173	1.00132	15	5.46255	1.05922	11	18.7874	0.957317	15	14.674	1.02704	15	4.30502	0.962369	11	15.7572
B3KR50	cDNA FLJ33691 fis, clone BRAWH2002976, highly similar to GROWTH FACTOR RECEPTOR-BOUND PROTEIN 2 OS=Homo sapiens PE=2 SV=1 - [B3KR50_HUMAN]	42.86	9	9	25	217	25.1784	6.31592	1.03516	13	3.78528	1.02103	5	4.64674	0.958327	7	3.70045	0.948004	13	9.46032	0.897218	5	7.06501	1.04677	7	5.43936	1.02972	13	4.49711	1.11691	5	6.51336	0.911768	7	16.9746	0.975055	13	4.51418	0.926534	5	14.6859	1.0239	7	6.72513
O95372	Acyl-protein thioesterase 2 OS=Homo sapiens GN=LYPLA2 PE=1 SV=1 - [LYPA2_HUMAN]	42.86	8	8	18	231	24.7207	7.2251	0.996476	7	3.19335	1.01269	5	9.77413	1.06919	6	18.0068	1.03298	7	5.64671	1.02166	5	5.91253	0.927619	6	13.9836	0.985219	7	6.23535	1.00527	5	12.5163	0.891022	6	16.2683	0.954717	7	10.2383	0.970817	5	10.6114	1.08222	6	18.2769
U6FM64	Myoglobin (Fragment) OS=Homo sapiens GN=MB PE=2 SV=1 - [U6FM64_HUMAN]	42.86	1	1	1	35	3.93306	5.0083	0.984165	1								1.05347	1								0.85435	1								1.19687	1
Q53GA7	Tubulin alpha chain (Fragment) OS=Homo sapiens PE=2 SV=1 - [Q53GA7_HUMAN]	42.76	5	17	532	449	49.7914	5.13525	1.02719	47	7.57603	1.02699	60	9.69382	1.02325	57	10.609	0.998915	47	11.5069	1.00958	60	10.8351	0.99955	57	8.39112	1.03118	47	7.73328	1.0112	60	11.5186	0.912603	57	20.1476	0.891287	47	9.97545	0.929967	60	7.51726	1.05817	57	15.2576
Q16762	Thiosulfate sulfurtransferase OS=Homo sapiens GN=TST PE=1 SV=4 - [THTR_HUMAN]	42.76	11	11	28	297	33.4078	7.25439	0.806422	10	24.2405	0.99283	9	6.67362	1.0002	8	14.2092	1.08965	10	10.2273	0.957385	9	13.2817	0.965746	8	9.29658	0.837015	10	15.2715	1.06335	9	7.60992	0.985149	8	7.74504	1.38555	10	41.8322	1.0433	9	15.5714	0.971157	8	10.0972
P49207	60S ribosomal protein L34 OS=Homo sapiens GN=RPL34 PE=1 SV=3 - [RL34_HUMAN]	42.74	7	7	60	117	13.2845	11.4731	1.0586	26	13.2798	1.09403	17	8.62534	0.985727	17	10.1925	0.868371	26	18.5804	0.917695	17	7.06531	1.0033	17	11.1974	1.11632	26	11.2075	1.10245	17	6.13704	1.1338	17	12.0135	0.87041	26	27.0639	0.918779	17	5.22161	0.847452	17	8.48647
P40939	Trifunctional enzyme subunit alpha, mitochondrial OS=Homo sapiens GN=HADHA PE=1 SV=2 - [ECHA_HUMAN]	42.73	27	27	185	763	82.9469	9.0415	0.972667	61	6.88948	0.98866	66	6.78746	1.02805	58	8.25098	1.0831	61	6.72696	1.02671	65	7.67492	1.01395	58	10.4721	0.976456	61	6.77826	1.00432	66	5.72129	0.9078	58	23.6195	1.0237	61	7.82123	0.992845	66	5.54767	1.00351	58	13.1166
P00352	Retinal dehydrogenase 1 OS=Homo sapiens GN=ALDH1A1 PE=1 SV=2 - [AL1A1_HUMAN]	42.71	17	20	124	501	54.827	6.72705	0.871801	37	11.1096	0.967811	43	9.0528	1.12128	37	8.50894	1.19726	37	12.1998	1.01093	43	6.55784	0.924201	37	10.0631	0.867822	37	7.95091	1.02983	43	5.31009	1.03244	37	19.2695	1.18682	37	10.6673	0.995665	43	7.37625	0.923785	37	12.5668
A0A087WV22	60S ribosomal protein L10 OS=Homo sapiens GN=RPL10 PE=1 SV=1 - [A0A087WV22_HUMAN]	42.7	1	8	52	178	20.4258	10.521							1.08925	2	10.4251							0.725814	2	43.6874							0.959971	2	8.90264							1.25922	2	32.4394
Q7L0Y3	Mitochondrial ribonuclease P protein 1 OS=Homo sapiens GN=TRMT10C PE=1 SV=2 - [MRRP1_HUMAN]	42.68	14	14	39	403	47.3166	9.36377	0.983256	14	7.41188	0.980275	13	3.54645	0.969816	12	5.34664	1.03562	14	7.33379	1.02589	13	6.45831	1.02882	12	7.07247	0.992201	14	6.72241	0.99402	13	5.8526	1.02271	12	11.9759	0.966451	14	4.57322	1.01361	13	3.72457	0.962699	12	7.36109
C9JNW5	60S ribosomal protein L24 OS=Homo sapiens GN=RPL24 PE=1 SV=1 - [C9JNW5_HUMAN]	42.67	8	8	88	150	17.5315	10.7847	1.05057	34	15.4956	1.05599	26	12.3295	0.996639	28	13.7553	0.902827	34	13.7592	0.892805	26	8.75433	1.07211	28	9.01739	1.08401	34	7.50467	1.15231	26	8.61997	0.892454	28	34.2747	0.896084	34	13.9839	0.895172	26	5.57716	0.94618	28	21.0774
Q9UHD8	Septin-9 OS=Homo sapiens GN=SEPT9 PE=1 SV=2 - [SEPT9_HUMAN]	42.66	24	24	108	586	65.3608	8.96826	1.01166	42	7.0195	1.03149	33	9.7881	1.03684	33	12.2476	0.930859	42	11.0517	0.963253	33	6.19108	0.991748	33	11.7769	1.06516	42	6.47103	1.03714	33	6.28003	1.04556	33	16.3744	0.947254	42	11.1284	0.984752	33	5.71992	0.956722	33	14.5926
P49327	Fatty acid synthase OS=Homo sapiens GN=FASN PE=1 SV=3 - [FAS_HUMAN]	42.65	87	87	652	2511	273.254	6.44287	0.988864	224	7.28135	1.04917	212	7.0703	1.12252	216	10.6891	1.00068	224	12.8661	0.932002	212	8.05956	0.94565	216	9.32652	1.02658	224	8.1281	1.04007	212	7.15899	1.02879	216	16.4138	0.990926	224	11.4532	0.978539	211	7.37394	0.912446	216	13.5912
P68104	Elongation factor 1-alpha 1 OS=Homo sapiens GN=EEF1A1 PE=1 SV=1 - [EF1A1_HUMAN]	42.64	3	19	549	462	50.1091	9.01221	1.06212	14	10.4591	0.863639	11	13.6792	1.00272	16	13.6101	0.916877	14	24.0991	0.968389	11	28.0201	0.829656	16	28.7936	1.04342	14	6.6342	1.05244	11	12.2753	1.14701	16	17.9472	0.980659	14	7.37353	1.09727	11	4.2568	0.950247	16	14.9753
F8W118	Nucleosome assembly protein 1-like 1 (Fragment) OS=Homo sapiens GN=NAP1L1 PE=1 SV=1 - [F8W118_HUMAN]	42.58	1	8	62	209	24.6783	4.67822	0.960525	2	3.72713	0.956138	2	11.6123	1.17726	2	5.55842	1.09475	2	15.0904	1.00951	2	8.93502	1.05197	2	3.15925	0.906697	2	5.93092	0.915952	2	3.30341	0.712708	2	2.1919	1.10975	2	11.3425	1.11818	2	0.566755	1.07544	2	3.14434
B2R7R5	cDNA, FLJ93570, highly similar to Homo sapiens phosphoribosyl pyrophosphate synthetase-associated protein 2 (PRPSAP2), mRNA OS=Homo sapiens PE=2 SV=1 - [B2R7R5_HUMAN]	42.55	9	12	46	369	40.8573	7.44482	0.916336	7	9.37047	0.952946	10	5.44506	0.983359	10	8.38393	1.04779	7	8.83883	0.963594	10	9.35724	1.17512	10	6.38858	0.959657	7	4.21363	0.995942	10	6.23135	0.800771	10	20.486	1.10611	7	17.0575	1.017	10	6.32754	1.08275	10	6.86753
Q9H9B4	Sideroflexin-1 OS=Homo sapiens GN=SFXN1 PE=1 SV=4 - [SFXN1_HUMAN]	42.55	10	11	40	322	35.5963	9.0708	1.00802	13	9.80075	0.977485	13	4.65717	0.904288	12	4.33565	0.971841	13	13.3543	1.0295	13	6.38643	1.05353	12	5.22953	1.02686	13	10.3186	0.99528	13	6.71052	0.959863	12	10.9513	0.93657	13	11.6554	1.01651	13	2.53104	1.02506	12	9.84349
B4DNE0	cDNA FLJ52573, highly similar to Elongation factor 1-alpha 1 OS=Homo sapiens PE=2 SV=1 - [B4DNE0_HUMAN]	42.53	1	15	454	395	42.5692	9.01221							1.04175	1								1.05991	1								0.808526	1								1.08974	1
Q12974	Protein tyrosine phosphatase type IVA 2 OS=Homo sapiens GN=PTP4A2 PE=1 SV=1 - [TP4A2_HUMAN]	42.51	3	6	21	167	19.1148	8.36768	0.906795	6	3.10903	1.03767	6	17.4923	1.03713	4	19.2377	1.12001	6	6.25989	0.898353	6	15.4508	0.942794	4	12.2484	1.03469	6	12.5935	1.16106	6	4.17812	1.02313	4	52.0172	0.991991	6	20.0683	0.9257	6	12.6153	0.990325	4	21.0876
B4DJ75	Serine/threonine-protein phosphatase OS=Homo sapiens PE=2 SV=1 - [B4DJ75_HUMAN]	42.47	2	12	98	299	34.099	6.16357	0.983639	3	0.197138	0.975912	2	3.81915	0.946593	5	3.5004	0.985648	3	1.57651	1.05804	2	10.0238	1.05986	5	7.30117	1.07463	3	4.75079	0.995361	2	5.21343	0.911897	5	11.3105	0.949959	3	5.25231	0.976352	2	0.890613	1.04301	5	5.66146
P38159	RNA-binding motif protein, X chromosome OS=Homo sapiens GN=RBMX PE=1 SV=3 - [RBMX_HUMAN]	42.46	5	19	110	391	42.3063	10.0522	0.934803	19	15.6877	0.952506	9	6.00443	0.873066	12	10.9101	1.03543	19	17.0761	1.06287	9	6.41935	1.08834	12	6.73254	0.961239	19	10.277	0.956495	9	6.11132	0.925059	12	10.0257	1.0851	19	27.6811	1.02848	9	3.97224	1.02945	12	5.29517
Q9Y3E5	Peptidyl-tRNA hydrolase 2, mitochondrial OS=Homo sapiens GN=PTRH2 PE=1 SV=1 - [PTH2_HUMAN]	42.46	6	6	23	179	19.181	8.73389	1.02789	8	5.967	1.07941	10	10.575	1.03655	5	5.86889	0.955381	8	10.0175	0.953132	10	8.23972	1.00103	5	2.27471	0.992027	8	6.70811	0.989227	10	10.4664	1.00546	5	7.82522	1.0389	8	7.45271	0.942541	10	7.88353	0.956732	5	6.39408
B4DIZ2	cDNA FLJ57995, moderately similar to Ubiquitin-conjugating enzyme E2-25 kDa (EC 6.3.2.19) OS=Homo sapiens PE=2 SV=1 - [B4DIZ2_HUMAN]	42.45	5	5	21	139	15.8001	5.63037	0.958648	7	4.95507	0.958262	7	5.03002	0.990049	7	5.73043	0.984408	7	16.9581	0.974607	7	12.6066	0.927589	7	4.1779	0.896123	7	14.6377	1.00727	7	6.3963	1.09395	7	10.2585	1.10546	7	8.5415	1.01925	7	6.46629	1.0042	7	11.3219
Q9UMX5	Neudesin OS=Homo sapiens GN=NENF PE=1 SV=1 - [NENF_HUMAN]	42.44	6	6	16	172	18.8448	5.69385	0.981226	4	4.14712	1.00638	8	6.65915	0.989971	4	7.58978	1.00247	4	6.54765	0.991649	8	8.85062	1.01364	4	3.50054	0.926472	4	11.5368	0.949507	8	10.0922	1.01957	4	6.77079	1.14283	4	11.2942	1.03348	8	5.64008	0.970446	4	4.21204
P62333	26S protease regulatory subunit 10B OS=Homo sapiens GN=PSMC6 PE=1 SV=1 - [PRS10_HUMAN]	42.42	15	15	59	389	44.1451	7.48877	0.988987	24	8.49502	0.981308	18	5.78122	0.951322	17	6.50928	0.996159	24	10.5694	0.998765	18	9.62129	1.05526	17	5.98606	1.03449	24	6.96948	0.983588	18	7.89991	0.969183	17	11.0698	0.989753	24	10.1199	1.02628	18	3.62389	1.00614	17	6.86106
P62834	Ras-related protein Rap-1A OS=Homo sapiens GN=RAP1A PE=1 SV=1 - [RAP1A_HUMAN]	42.39	2	7	42	184	20.9737	6.66846	0.949749	4	3.92366				1.01381	1		1.06275	4	2.484				1.05948	1		1.01779	4	0.13436				0.968472	1		1.0781	4	5.66937				0.942639	1
Q04760	Lactoylglutathione lyase OS=Homo sapiens GN=GLO1 PE=1 SV=4 - [LGUL_HUMAN]	42.39	8	8	65	184	20.7642	5.31299	0.997729	27	5.83835	0.952517	19	11.5473	0.915948	19	10.4731	0.965983	27	7.92059	1.03612	19	4.77719	1.08842	19	8.08576	1.03564	27	6.49383	1.00389	19	6.6908	0.881125	19	14.7833	0.99783	27	8.0315	1.01623	19	5.48081	1.06462	19	6.20114
P30838	Aldehyde dehydrogenase, dimeric NADP-preferring OS=Homo sapiens GN=ALDH3A1 PE=1 SV=3 - [AL3A1_HUMAN]	42.38	18	19	124	453	50.3628	6.53662	0.865448	41	11.7219	0.871671	45	10.354	0.994322	33	9.78086	1.11798	41	8.78954	1.01085	45	9.69558	0.892434	33	11.1053	0.923799	41	8.68162	1.02949	45	7.19577	1.25749	33	16.7956	1.19792	41	13.9202	1.09113	45	7.06625	0.884002	33	13.166
P61020	Ras-related protein Rab-5B OS=Homo sapiens GN=RAB5B PE=1 SV=1 - [RAB5B_HUMAN]	42.33	4	7	36	215	23.6919	8.1333	0.948767	3	9.97569	0.951092	3	2.67403	1.14773	5	15.668	1.08395	3	5.76196	0.93572	3	7.99938	1.04368	5	4.74495	0.932217	3	5.33405	1.0587	3	5.72238	0.974674	5	30.2822	1.10585	3	4.71184	1.0803	3	5.48311	0.977095	5	12.1466
X6RM59	5'-nucleotidase OS=Homo sapiens GN=NT5C3A PE=1 SV=1 - [X6RM59_HUMAN]	42.3	12	12	46	331	37.3815	6.87354	1.00358	15	2.26592	0.92859	12	3.06842	0.952728	19	5.76279	0.977143	15	8.0926	1.07783	12	3.86437	1.04006	19	4.39826	1.00652	15	7.32325	0.99768	12	3.04094	0.958454	19	5.84629	1.01255	15	5.89149	1.01346	12	4.09617	1.03487	19	5.4393
P62330	ADP-ribosylation factor 6 OS=Homo sapiens GN=ARF6 PE=1 SV=2 - [ARF6_HUMAN]	42.29	5	6	36	175	20.0694	8.95361	0.971801	11	3.36874	0.91953	11	8.78616	1.00386	11	10.7102	1.01408	11	5.63097	1.08012	11	8.71309	1.11473	11	5.65765	0.915023	11	4.9296	1.00945	11	6.89944	0.934788	11	11.2812	1.08876	11	10.6389	0.998477	11	2.84948	0.891549	11	10.137
B2R6U8	cDNA, FLJ93125, highly similar to Homo sapiens cleavage and polyadenylation specific factor 5, 25 kDa(CPSF5), mRNA OS=Homo sapiens PE=2 SV=1 - [B2R6U8_HUMAN]	42.29	10	10	34	227	26.1987	8.82178	1.00425	16	8.27083	0.967695	8	5.561	0.938535	10	17.4192	1.0367	16	10.6741	1.03896	8	6.91561	0.975178	10	9.39833	1.01031	16	6.99269	1.03213	8	7.04649	1.10722	10	14.491	0.964617	16	9.4572	1.02265	8	3.21128	1.00049	10	13.4005
G8JLD5	Dynamin-1-like protein OS=Homo sapiens GN=DNM1L PE=1 SV=1 - [G8JLD5_HUMAN]	42.28	27	27	75	712	79.572	7.07861	0.968382	24	9.84164	0.979839	23	6.25182	1.02736	26	9.52553	1.06707	24	13.8938	0.996281	23	4.53227	1.02938	26	7.77186	0.972311	24	6.70377	1.00608	23	9.50587	0.883093	26	25.9995	1.03565	24	11.1243	1.02131	23	9.53571	1.02806	26	11.7155
A8K787	cDNA FLJ75273, highly similar to Homo sapiens solute carrier family 25 (mitochondrial carrier; adenine nucleotide translocator), member 4, mRNA OS=Homo sapiens PE=2 SV=1 - [A8K787_HUMAN]	42.28	3	13	120	298	33.0592	9.75928	0.927455	4	2.50079	0.976552	3	1.04202	1.03638	4	10.2637	1.07281	4	6.03371	1.0143	3	5.67296	1.06587	4	10.5033	0.959538	4	2.7462	1.02818	3	4.52194	0.930533	4	36.0061	1.11174	4	8.76297	1.00546	3	0.156578	0.982936	4	23.9187
A0A087WZX2	NADH dehydrogenase [ubiquinone] 1 beta subcomplex subunit 6 OS=Homo sapiens GN=NDUFB6 PE=1 SV=1 - [A0A087WZX2_HUMAN]	42.27	4	4	11	97	11.7081	9.48096	1.03174	5	11.9797	0.976093	2	5.8602	0.960374	4	6.55745	0.962825	5	6.0756	0.96903	2	2.2896	1.01108	4	2.72936	1.02782	5	5.72154	0.996874	2	3.84074	0.956245	4	19.5315	0.944112	5	15.3686	1.05963	2	4.31571	1.04243	4	10.8277
Q9UKD2	mRNA turnover protein 4 homolog OS=Homo sapiens GN=MRTO4 PE=1 SV=2 - [MRT4_HUMAN]	42.26	11	12	43	239	27.5429	8.29443	1.07855	19	10.1738	0.987097	9	5.70382	0.941892	13	11.0717	0.905837	19	18.5673	1.05024	9	5.98607	1.07476	13	7.76312	1.03676	19	4.71573	0.975342	9	5.77224	0.945258	13	8.89773	0.918663	19	18.7363	0.994511	9	4.59601	1.00029	13	10.833
Q9UHV9	Prefoldin subunit 2 OS=Homo sapiens GN=PFDN2 PE=1 SV=1 - [PFD2_HUMAN]	42.21	6	6	18	154	16.6376	6.58057	1.12517	5	1.85645	0.991948	7	4.29065	0.948222	6	7.57218	0.886179	5	2.54076	1.04612	7	10.6343	1.0241	6	6.03997	1.04571	5	2.5875	1.04563	7	4.54017	0.985024	6	17.5821	0.9883	5	2.18353	0.992463	7	8.24578	1.00421	6	7.33951
A0A090MEX8	HLA class I antigen (Fragment) OS=Homo sapiens GN=HLA-A PE=3 SV=1 - [A0A090MEX8_HUMAN]	42.18	0	9	23	339	37.9256	6.1001
P41091	Eukaryotic translation initiation factor 2 subunit 3 OS=Homo sapiens GN=EIF2S3 PE=1 SV=3 - [IF2G_HUMAN]	42.16	17	17	90	472	51.0772	8.39697	1.06109	31	7.47756	0.979566	31	5.95226	0.926304	28	9.56177	0.881503	31	11.5208	1.05036	31	4.69789	1.11466	28	6.12128	1.05156	31	5.64309	0.984595	31	3.09444	0.947554	28	15.1589	0.947001	31	12.1672	0.994947	31	6.60539	1.00291	28	8.72191
Q9Y2X3	Nucleolar protein 58 OS=Homo sapiens GN=NOP58 PE=1 SV=1 - [NOP58_HUMAN]	42.16	19	19	82	529	59.5405	8.92432	1.02177	29	8.2966	1.04239	28	6.62759	0.934044	25	7.48623	0.920811	29	11.2833	1.05621	28	10.1792	1.09006	25	9.11411	1.05634	29	7.81685	0.937351	28	8.45802	0.945073	25	12.7451	0.904558	29	11.2472	0.977949	28	8.83807	1.06762	25	18.0462
Q9NUJ1	Mycophenolic acid acyl-glucuronide esterase, mitochondrial OS=Homo sapiens GN=ABHD10 PE=1 SV=1 - [ABHDA_HUMAN]	42.16	9	9	23	306	33.9107	8.57275	1.00179	10	11.2226	1.07062	4	8.39591	0.974154	9	9.74396	0.998813	10	8.01464	0.968895	4	2.63315	1.15765	9	9.40334	0.980464	10	7.79221	1.01445	4	4.29258	0.810803	9	42.8953	0.97642	10	9.61282	0.958545	4	7.65081	1.0718	9	13.5466
Q9Y2R9	28S ribosomal protein S7, mitochondrial OS=Homo sapiens GN=MRPS7 PE=1 SV=2 - [RT07_HUMAN]	42.15	9	9	20	242	28.116	9.99365	1.10651	12	5.67043	0.988288	4	3.63999	1.00714	4	0.461254	0.849067	12	6.48418	1.01836	4	6.3089	1.04857	4	6.19217	1.1206	12	9.32872	0.995871	4	7.02856	0.929833	4	8.25569	0.867685	12	5.42154	0.977644	4	7.47659	0.999577	4	0.905362
Q8WW12	PEST proteolytic signal-containing nuclear protein OS=Homo sapiens GN=PCNP PE=1 SV=2 - [PCNP_HUMAN]	42.13	7	7	14	178	18.9134	7.48877	1.01596	3	3.62533	0.978747	5	4.90523	0.932744	6	17.8564	0.95961	3	1.41467	1.02638	5	2.07113	0.957801	6	12.2896	1.00399	3	0.260557	0.969162	5	0.807396	1.08115	6	13.7564	1.05192	3	10.5231	0.991194	5	2.7354	1.02002	6	16.85
A8K9K6	cDNA FLJ76962, highly similar to Homo sapiens nucleolar protein 5A (56kDa with KKE/D repeat) (NOL5A), mRNA OS=Homo sapiens PE=2 SV=1 - [A8K9K6_HUMAN]	42.09	21	21	103	594	65.9367	9.23193	1.03156	35	9.09753	1.01662	32	4.7718	0.972791	36	11.1735	0.976172	35	12.4907	1.03594	32	6.50359	1.05185	36	7.42702	1.03199	35	5.21792	0.953397	32	7.55799	0.922747	36	16.3525	0.938417	35	12.3306	0.965026	32	8.60505	1.04409	36	8.08585
A8K525	cDNA FLJ76817, highly similar to Homo sapiens non-POU domain containing, octamer-binding (NONO), mRNA OS=Homo sapiens PE=2 SV=1 - [A8K525_HUMAN]	42.04	21	23	153	471	54.2534	9.20264	1.06117	46	6.7057	0.986959	49	6.13256	0.95559	50	11.2865	0.8862	46	10.5881	1.03459	49	9.03219	1.03655	50	7.15339	1.06776	46	7.03948	0.982882	49	9.73934	1.01321	50	13.2999	0.947184	46	10.0116	0.995669	49	8.89369	0.982221	50	9.78127
A0A087X243	Glutathione S-transferase P (Fragment) OS=Homo sapiens GN=GSTP1 PE=1 SV=1 - [A0A087X243_HUMAN]	42.03	1	2	105	69	7.44466	7.07861				0.956536	2	5.68977	1.03822	1					1.09853	2	2.215	1.09401	1					0.964833	2	3.09879	0.997586	1					0.990078	2	6.57441	0.841237	1
Q07020	60S ribosomal protein L18 OS=Homo sapiens GN=RPL18 PE=1 SV=2 - [RL18_HUMAN]	42.02	7	7	81	188	21.6211	11.7222	1.07294	27	11.2862	1.07501	20	6.94446	0.977977	34	7.77421	0.843899	27	16.2604	0.886914	20	6.48132	0.986913	34	7.64276	1.06763	27	13.1649	1.10258	20	7.00742	1.00807	34	13.1404	0.93913	27	22.5582	0.957103	20	9.82163	0.981881	34	10.8512
B4DM33	cDNA FLJ52068, highly similar to Microtubule-associated protein RP/EB family member 1 OS=Homo sapiens PE=2 SV=1 - [B4DM33_HUMAN]	42.02	10	10	35	238	26.5656	5.2876	0.928902	11	9.57179	0.966268	12	8.895	0.940616	12	6.70438	1.08776	11	9.91094	1.01756	12	9.55674	1.01685	12	7.89875	0.98973	11	11.0194	1.04872	12	5.65708	0.963795	12	25.0855	0.918894	11	14.542	0.992355	12	9.87638	1.04095	12	11.999
B4DP27	cDNA FLJ52153, highly similar to Transmembrane emp24 domain-containing protein 2 OS=Homo sapiens PE=2 SV=1 - [B4DP27_HUMAN]	42.01	7	7	46	169	19.2467	5.85889	0.967676	13	5.21896	0.997989	18	6.91853	0.991499	15	9.5319	0.939006	13	7.29803	1.0143	18	7.57087	1.02013	15	8.98425	1.00322	13	4.73184	0.961001	18	9.4226	1.03011	15	5.91699	1.04544	13	6.61983	1.00289	18	9.38502	0.968514	15	9.85308
Q7L1Q6	Basic leucine zipper and W2 domain-containing protein 1 OS=Homo sapiens GN=BZW1 PE=1 SV=1 - [BZW1_HUMAN]	42	20	25	118	419	48.0127	5.92236	1.06557	29	12.2569	0.943122	22	6.59158	0.937097	32	12.4723	0.890476	29	12.7427	1.04759	22	5.35154	1.07316	32	10.5019	1.05675	29	8.36999	0.968277	22	8.21782	0.931566	32	20.2644	0.877566	29	14.1673	1.04154	22	7.42118	1.01384	32	13.4119
Q333A6	Rhesus blood group, D antigen (Fragment) OS=Homo sapiens GN=RHD PE=4 SV=1 - [Q333A6_HUMAN]	42	1	1	1	50	5.20795	6.3667							1.2611	1								1.02523	1								0.757932	1								0.984687	1
F6KRM6	MHC class I antigen (Fragment) OS=Homo sapiens GN=HLA-A PE=3 SV=1 - [F6KRM6_HUMAN]	41.99	1	6	14	181	20.81	5.92236	1.00484	1		0.921924	1					0.834555	1		1.00773	1					1.10149	1		1.0212	1					1.0169	1		1.06023	1
A0A024QZJ7	Coiled-coil domain containing 6, isoform CRA_a OS=Homo sapiens GN=CCDC6 PE=4 SV=1 - [A0A024QZJ7_HUMAN]	41.98	19	19	58	474	53.2618	7.34229	1.05941	17	7.73236	0.997168	19	6.4198	0.960643	22	13.6108	0.981053	17	9.99203	1.03559	19	11.2648	1.02329	22	8.2001	0.985657	17	6.30879	0.941074	19	7.99133	1.0073	22	10.3156	0.941427	17	9.12721	0.97721	19	6.00235	1.01635	22	8.79649
Q9Y5K6	CD2-associated protein OS=Homo sapiens GN=CD2AP PE=1 SV=1 - [CD2AP_HUMAN]	41.94	25	25	73	639	71.4073	6.40479	0.957704	29	6.81505	0.973156	22	5.9501	0.985568	22	4.96148	1.06546	29	7.88454	0.987082	22	7.33228	1.02204	22	6.85758	0.981296	29	5.71081	1.04012	22	7.33289	0.924273	22	18.3603	1.0234	29	7.32374	1.01832	22	6.4971	1.01634	22	8.75174
Q502X2	Diablo homolog (Drosophila) OS=Homo sapiens GN=DIABLO PE=2 SV=1 - [Q502X2_HUMAN]	41.94	8	8	26	186	21.2195	4.80518	1.01673	10	6.67093	1.03581	10	4.85673	0.940431	6	9.08274	1.0215	10	8.40959	0.978991	10	5.14014	1.03507	6	3.86994	0.926455	10	8.67529	0.983257	10	6.84256	1.0137	6	7.95686	1.0779	10	6.91145	1.00902	10	5.90494	1.01357	6	4.96532
A0A087WYS2	Retrotransposon-derived protein PEG10 (Fragment) OS=Homo sapiens GN=PEG10 PE=1 SV=1 - [A0A087WYS2_HUMAN]	41.94	1	1	1	31	3.83186	4.89404	0.880417	1								1.0712	1								1.00497	1								1.11805	1
F5GYN4	Ubiquitin thioesterase OTUB1 OS=Homo sapiens GN=OTUB1 PE=1 SV=1 - [F5GYN4_HUMAN]	41.91	8	8	42	241	28.033	5.2876	1.03098	13	4.08744	0.999438	15	2.10566	0.923326	14	5.87565	0.934938	13	9.63819	0.965164	15	10.7014	1.0588	14	8.52752	1.02202	13	7.26671	1.029	15	6.97306	0.894492	14	17.323	0.957895	13	3.86092	0.97563	15	9.07511	1.0262	14	9.40047
C9JLU1	DNA-directed RNA polymerases I, II, and III subunit RPABC3 (Fragment) OS=Homo sapiens GN=POLR2H PE=1 SV=8 - [C9JLU1_HUMAN]	41.89	5	5	21	148	16.9143	4.67822	1.01887	7	4.98009	0.927119	9	9.44164	1.02818	5	3.32056	0.88094	7	10.3523	1.03259	9	2.01591	0.936306	5	3.37159	1.06335	7	4.22367	1.01082	9	3.46144	1.14942	5	2.39513	0.971246	7	7.26291	1.02828	9	6.2558	0.876644	5	10.0333
O43290	U4/U6.U5 tri-snRNP-associated protein 1 OS=Homo sapiens GN=SART1 PE=1 SV=1 - [SNUT1_HUMAN]	41.88	25	26	76	800	90.2003	6.12549	0.988586	25	12.8032	1.00537	26	6.13613	0.992473	24	5.05806	0.960138	25	11.1573	0.981521	26	12.7361	0.96826	24	12.0176	1.00895	25	9.84096	0.997651	26	9.51515	0.970276	24	15.3238	1.04995	25	16.9315	1.00097	26	6.56111	1.06515	24	12.4431
B4DS24	cDNA FLJ50635, highly similar to ATP-dependent RNA helicase DDX19A (EC 3.6.1.-) OS=Homo sapiens PE=2 SV=1 - [B4DS24_HUMAN]	41.83	2	17	50	447	50.402	6.58057	0.934661	1		1.28496	2	5.70357	0.95157	3	4.59747	1.01664	1		0.713082	2	17.3178	0.953404	3	4.99881	0.980201	1		1.26288	2	6.62927	0.598315	3	16.678	1.12419	1		0.701911	2	6.43275	1.57222	3	0.257577
P60981	Destrin OS=Homo sapiens GN=DSTN PE=1 SV=3 - [DEST_HUMAN]	41.82	10	11	60	165	18.4935	7.85498	1.0158	18	11.817	0.927191	13	7.60437	0.898205	19	11.7318	0.95598	18	16.7223	1.04579	13	6.11326	1.07753	19	16.6563	1.02713	18	14.0307	0.973957	13	5.45094	1.06618	19	19.3779	1.00807	18	17.3309	1.04572	13	9.67741	0.968166	19	4.04018
P24666	Low molecular weight phosphotyrosine protein phosphatase OS=Homo sapiens GN=ACP1 PE=1 SV=3 - [PPAC_HUMAN]	41.77	6	6	28	158	18.0308	6.7417	1.01171	11	3.90339	1.00537	10	5.66444	0.945982	7	7.00042	1.00977	11	4.69667	1.02161	10	5.7923	1.04701	7	0.774893	1.00196	11	5.27893	0.921714	10	7.99534	1.01837	7	4.1308	0.9894	11	4.1318	1.02011	10	2.50222	1.064	7	8.99853
I3L4I0	FLYWCH family member 2 (Fragment) OS=Homo sapiens GN=FLYWCH2 PE=1 SV=1 - [I3L4I0_HUMAN]	41.76	3	3	6	91	9.55419	9.83252	0.934887	2	1.43282	1.06012	2	3.60687	0.986331	2	6.46384	1.11499	2	11.5442	1.0675	2	7.59227	1.00555	2	1.4085	0.917626	2	17.4735	0.953867	2	12.535	0.855382	2	13.6311	1.10916	2	8.04652	0.909069	2	16.5556	1.15823	2	7.389
H0YD13	CD44 antigen OS=Homo sapiens GN=CD44 PE=1 SV=2 - [H0YD13_HUMAN]	41.75	8	8	91	206	22.6686	8.19189	1.07602	32	8.10636	1.03876	30	5.5667	1.06611	29	8.87838	0.849089	32	9.9728	0.926157	30	6.31757	0.933773	29	8.51947	1.06136	32	9.48389	1.01209	30	6.8438	1.09866	29	9.77232	0.937315	32	11.728	1.02428	30	8.25461	0.936673	29	7.51536
Q00796	Sorbitol dehydrogenase OS=Homo sapiens GN=SORD PE=1 SV=4 - [DHSO_HUMAN]	41.74	14	14	86	357	38.2998	7.97217	0.951335	30	7.43119	0.999254	27	4.95641	0.985621	29	7.74525	1.02955	30	7.89518	1.021	27	6.38861	0.995898	29	6.84956	1.00991	30	8.15807	1.00887	27	9.46313	1.04092	29	11.3442	1.05358	30	13.7081	0.969918	27	6.58617	0.991827	29	9.40105
B2R9I9	cDNA, FLJ94417, highly similar to Homo sapiens WD repeat domain 57 (U5 snRNP specific) (WDR57), mRNA OS=Homo sapiens PE=2 SV=1 - [B2R9I9_HUMAN]	41.74	11	11	22	357	39.2417	8.41162	1.03217	8	3.80756	1.02422	6	4.98905	0.95364	8	18.2702	0.948755	8	1.09386	1.01928	6	5.9708	1.04084	8	10.4852	1.025	8	4.02665	1.00148	6	3.9798	0.967588	8	20.2857	0.942031	8	8.90119	0.958631	6	7.81284	1.03246	8	13.0887
B4DRV2	Succinate-CoA ligase subunit beta OS=Homo sapiens PE=2 SV=1 - [B4DRV2_HUMAN]	41.73	15	15	42	405	43.8469	5.90967	0.980767	12	7.16005	1.02478	11	4.78771	1.08946	10	13.8624	1.0452	12	12.4743	1.0109	11	7.08646	0.97844	10	14.817	0.976811	12	11.8818	0.979548	11	10.7716	1.06369	10	8.26428	1.04339	12	7.21923	0.984827	11	4.66844	0.944969	10	4.12812
P50402	Emerin OS=Homo sapiens GN=EMD PE=1 SV=1 - [EMD_HUMAN]	41.73	9	9	36	254	28.9759	5.50342	0.996411	16	8.45804	0.967081	10	6.35531	0.990891	10	5.22622	0.988406	16	9.69621	1.063	10	4.30016	0.975577	10	5.76928	0.99293	16	5.23406	0.923865	10	5.53744	1.06821	10	12.9705	1.03264	16	11.7811	1.02801	10	4.0196	1.00335	10	12.6638
P48444	Coatomer subunit delta OS=Homo sapiens GN=ARCN1 PE=1 SV=1 - [COPD_HUMAN]	41.68	19	19	102	511	57.1741	6.21436	0.996461	40	7.70609	0.949729	30	6.11907	0.991331	32	10.04	1.04783	40	9.87931	1.00209	30	5.08269	0.985286	32	6.59256	0.936465	40	10.381	1.02586	30	8.59964	0.969683	32	17.5105	1.05837	40	9.11511	1.03153	30	6.78216	1.01119	32	9.75026
O00232	26S proteasome non-ATPase regulatory subunit 12 OS=Homo sapiens GN=PSMD12 PE=1 SV=3 - [PSD12_HUMAN]	41.67	17	17	75	456	52.8706	7.6499	1.04712	26	4.59479	0.944754	25	7.15265	0.977498	24	8.50746	0.933775	26	10.2037	1.02368	25	5.57484	1.12321	24	8.83714	1.00888	26	8.21071	0.996597	25	9.67238	0.916233	24	15.7048	0.983143	26	11.3673	1.01749	25	4.84942	0.981162	24	13.1365
Q15645	Pachytene checkpoint protein 2 homolog OS=Homo sapiens GN=TRIP13 PE=1 SV=2 - [PCH2_HUMAN]	41.67	15	15	58	432	48.5205	6.0874	0.979943	18	9.56178	0.971011	16	7.18346	1.00234	24	7.57189	1.00876	18	10.0075	1.00472	16	5.53536	1.04689	24	9.24942	1.00995	18	4.7768	1.00245	16	4.30906	0.966975	24	13.4646	1.05418	18	10.9888	1.03136	16	6.45807	0.981977	24	6.2803
P62942	Peptidyl-prolyl cis-trans isomerase FKBP1A OS=Homo sapiens GN=FKBP1A PE=1 SV=2 - [FKB1A_HUMAN]	41.67	5	5	21	108	11.9431	8.1626	0.978804	7	3.47493	1.00246	5	6.25518	0.992179	9	11.9234	0.971578	7	7.9767	1.01853	5	3.0923	0.976319	9	10.0867	1.00977	7	5.31908	0.976888	5	2.4458	1.05035	9	11.6129	1.07352	7	8.96266	1.0249	5	0.259371	0.995552	9	7.41713
Q9NQR4	Omega-amidase NIT2 OS=Homo sapiens GN=NIT2 PE=1 SV=1 - [NIT2_HUMAN]	41.67	9	9	41	276	30.5886	7.21045	1.02736	14	9.13767	0.972907	13	7.55861	0.938834	14	9.27093	0.989752	14	12.8532	1.0338	13	7.9735	1.06581	14	7.56026	1.00249	14	8.13722	1.0033	13	7.86739	0.908605	14	19.3359	1.00703	14	8.11668	1.00521	13	4.44586	1.04919	14	6.46708
R4GMX5	Basigin (Fragment) OS=Homo sapiens GN=BSG PE=1 SV=1 - [R4GMX5_HUMAN]	41.67	1	3	11	84	9.32951	5.36377	0.60126	1								1.35352	1								0.547933	1								1.91101	1
Q99460	26S proteasome non-ATPase regulatory subunit 1 OS=Homo sapiens GN=PSMD1 PE=1 SV=2 - [PSMD1_HUMAN]	41.66	33	33	129	953	105.769	5.38916	1.02544	47	7.19752	0.955903	37	7.80402	0.981239	45	8.73311	0.931511	47	8.09036	1.01483	37	8.18372	1.0811	45	8.01508	1.03848	47	6.86723	1.03756	37	7.49275	0.931205	45	13.269	0.962357	47	10.3156	1.01813	37	4.40925	0.993611	45	14.5484
P05023	Sodium/potassium-transporting ATPase subunit alpha-1 OS=Homo sapiens GN=ATP1A1 PE=1 SV=1 - [AT1A1_HUMAN]	41.64	27	38	213	1023	112.824	5.49072	0.950093	45	6.39149	1.00578	49	6.99792	1.02666	47	7.07208	1.04859	45	11.874	0.992279	49	6.96179	0.928555	47	9.34556	0.952454	45	6.55309	1.00331	49	5.83549	1.07351	47	14.5878	1.08794	45	9.23233	1.00711	49	6.25231	0.980361	47	9.28843
P46940	Ras GTPase-activating-like protein IQGAP1 OS=Homo sapiens GN=IQGAP1 PE=1 SV=1 - [IQGA1_HUMAN]	41.64	59	64	331	1657	189.134	6.48096	0.968649	116	8.93352	0.990014	105	8.84798	0.978743	97	12.3292	1.06002	116	11.025	1.00617	105	7.69353	1.02947	97	7.93267	0.987888	116	9.14085	1.00908	105	8.48336	0.941941	97	14.234	1.01825	116	13.4445	0.981208	105	8.18691	1.03511	97	10.6288
P62917	60S ribosomal protein L8 OS=Homo sapiens GN=RPL8 PE=1 SV=2 - [RL8_HUMAN]	41.63	11	11	64	257	28.0073	11.0337	1.05685	23	9.39588	1.04583	17	6.96808	1.01217	24	9.43039	0.830283	23	16.4976	0.873239	17	5.7736	0.972248	24	8.34398	1.13347	23	15.2746	1.16042	17	8.36057	1.06164	24	11.2197	0.80902	23	14.1006	0.926829	17	6.36997	0.96818	24	10.6774
Q15005	Signal peptidase complex subunit 2 OS=Homo sapiens GN=SPCS2 PE=1 SV=3 - [SPCS2_HUMAN]	41.59	9	9	30	226	24.9867	8.47021	1.03637	11	8.23445	1.00065	9	5.29575	1.03043	10	11.4042	0.987734	11	4.52477	1.00556	9	10.2139	1.00161	10	10.4681	0.935833	11	10.5525	0.963478	9	9.02816	1.01374	10	16.7404	1.04636	11	17.7256	0.9911	9	12.6212	0.957656	10	16.4336
O00410	Importin-5 OS=Homo sapiens GN=IPO5 PE=1 SV=4 - [IPO5_HUMAN]	41.57	35	38	225	1097	123.55	4.94482	1.01128	72	9.95974	0.989734	61	7.74274	1.01126	60	10.371	0.997731	72	16.1847	1.01292	61	10.4714	1.04525	60	9.01813	1.01654	72	8.54735	1.00424	61	12.2669	0.906528	60	26.2469	0.964523	72	8.42952	0.99307	61	8.61708	1.02697	60	13.6396
Q08211	ATP-dependent RNA helicase A OS=Homo sapiens GN=DHX9 PE=1 SV=4 - [DHX9_HUMAN]	41.57	43	43	247	1270	140.869	6.84424	1.02153	87	8.00139	1.00326	83	7.97555	1.00333	77	10.7385	0.991247	87	15.1163	1.03478	83	11.4075	1.04576	77	9.24266	1.01392	87	11.1058	1.0086	83	8.62385	0.954691	77	18.547	0.979859	87	10.821	0.973969	83	8.76204	0.995552	77	14.3157
Q96FS1	CTNND1 protein (Fragment) OS=Homo sapiens GN=CTNND1 PE=2 SV=2 - [Q96FS1_HUMAN]	41.57	29	29	147	830	92.3307	7.15186	1.0405	53	5.26939	1.02298	52	5.78025	1.00417	42	10.6002	0.94597	52	13.8763	0.994692	52	7.83831	1.0449	42	8.22767	1.06212	53	6.66995	1.00056	52	6.68912	0.907831	42	23.3801	0.912636	53	8.09616	0.975272	52	7.0047	1.05463	42	14.7279
Q13405	39S ribosomal protein L49, mitochondrial OS=Homo sapiens GN=MRPL49 PE=1 SV=1 - [RM49_HUMAN]	41.57	6	6	17	166	19.1859	9.45166	0.994321	6	6.9373	0.929234	6	7.01381	0.925104	5	4.51266	0.989958	6	8.61952	1.08173	6	6.16687	1.02961	5	5.36073	1.01962	6	7.69256	0.976168	6	2.37862	1.02776	5	12.2097	1.02473	6	18.9526	0.994894	6	6.93587	1.00723	5	2.90471
Q9UK76	Hematological and neurological expressed 1 protein OS=Homo sapiens GN=HN1 PE=1 SV=3 - [HN1_HUMAN]	41.56	5	5	12	154	16.0049	5.60498	1.08393	4	9.39472	1.04116	4	7.16975	1.11233	4	1.49427	0.937315	4	10.3659	0.979053	4	1.99952	0.914566	4	6.5339	1.04578	4	10.0458	0.978287	4	4.06214	1.01875	4	7.82952	0.838188	4	21.6417	1.02005	4	9.5204	0.950088	4	5.98536
A0A0K2BMD8	Mutant hemoglobin alpha 2 globin chain OS=Homo sapiens GN=HBA2 PE=3 SV=1 - [A0A0K2BMD8_HUMAN]	41.55	1	5	46	142	15.2479	8.67529				1.41166	2	3.78674							0.594684	2	2.27705							1.06596	2	8.98565							0.870869	2	2.51602
Q13347	Eukaryotic translation initiation factor 3 subunit I OS=Homo sapiens GN=EIF3I PE=1 SV=1 - [EIF3I_HUMAN]	41.54	12	12	61	325	36.4786	5.64307	1.04977	21	6.15814	0.958451	17	8.25177	0.932639	23	6.31602	0.92244	21	7.69177	1.00833	17	7.759	1.05332	23	8.01883	1.04456	21	3.62641	0.999488	17	5.41193	1.0197	23	17.1924	0.937434	21	9.16481	1.02513	17	3.88379	1.01468	23	11.9974
Q5XKP0	MICOS complex subunit MIC13 OS=Homo sapiens GN=MIC13 PE=1 SV=1 - [MIC13_HUMAN]	41.53	3	3	7	118	13.0788	9.42236	0.974213	2	13.1666	1.04792	2	17.2793	0.946786	3	0.554328	0.982345	2	28.1896	0.961761	2	21.2762	0.992564	3	6.44998	1.0802	2	11.8848	1.05468	2	15.2485	1.09875	3	4.41139	0.927479	2	12.6981	0.905996	2	17.7325	1.0498	3	10.9157
A8K897	cDNA FLJ78686, highly similar to Homo sapiens nucleoporin 93kDa (NUP93), mRNA OS=Homo sapiens PE=2 SV=1 - [A8K897_HUMAN]	41.51	33	33	87	819	93.3236	5.77002	1.04066	34	7.16478	1.00555	27	6.3819	1.00705	26	10.6646	0.935391	34	11.0211	1.02258	27	8.68671	1.00691	26	9.59073	1.06924	34	8.53592	0.986697	27	5.32096	1.01313	26	14.3892	0.966874	34	10.9886	0.980554	27	4.53554	0.961128	26	8.8501
Q9BQ04	RNA-binding protein 4B OS=Homo sapiens GN=RBM4B PE=1 SV=1 - [RBM4B_HUMAN]	41.5	2	14	44	359	40.1244	6.7417				0.909224	2	6.92645	0.996644	1					1.06187	2	4.94389	0.916271	1					1.06125	2	0.357748	1.17696	1					0.982757	2	2.30661	0.925483	1
E9PJ40	Receptor-binding cancer antigen-expressed on SiSo cells (Fragment) OS=Homo sapiens GN=EBAG9 PE=1 SV=1 - [E9PJ40_HUMAN]	41.46	1	1	1	41	4.51147	10.4331							0.828202	1								0.910131	1								1.03531	1								1.24689	1
C9J9K3	40S ribosomal protein SA (Fragment) OS=Homo sapiens GN=RPSA PE=1 SV=8 - [C9J9K3_HUMAN]	41.44	10	10	106	263	29.386	5.24951	1.05388	34	7.40264	1.09333	30	5.94191	0.973185	42	10.6422	0.888056	34	9.79801	0.871408	30	6.77073	1.01229	42	10.9123	1.07729	34	8.09253	1.1299	30	5.91931	0.988311	42	9.77035	0.95019	34	13.29	0.904457	30	7.28835	1.02923	42	7.34825
P22314	Ubiquitin-like modifier-activating enzyme 1 OS=Homo sapiens GN=UBA1 PE=1 SV=3 - [UBA1_HUMAN]	41.4	36	36	247	1058	117.774	5.75732	0.975504	73	7.92145	0.991139	82	7.62052	0.988232	92	11.4592	1.07197	73	9.91271	1.02929	82	7.6132	1.03814	92	9.44386	0.995058	73	7.78147	1.00669	82	8.09837	0.893055	92	29.6024	1.00005	73	8.96416	0.976944	82	9.17811	1.07286	92	14.7951
P23381	Tryptophan--tRNA ligase, cytoplasmic OS=Homo sapiens GN=WARS PE=1 SV=2 - [SYWC_HUMAN]	41.4	16	16	67	471	53.1316	6.22705	1.09606	30	7.9758	1.03816	16	9.38101	0.820888	21	16.3797	0.859592	29	7.56458	0.978418	16	7.96447	1.18308	21	10.3729	1.08322	30	9.70081	1.00122	16	6.41587	0.859332	21	20.673	0.887649	30	19.6028	0.970075	16	8.70111	1.08209	21	10.8268
H0YCG5	Serine/threonine-protein kinase PAK 1 (Fragment) OS=Homo sapiens GN=PAK1 PE=1 SV=1 - [H0YCG5_HUMAN]	41.39	1	7	16	244	27.1856	4.76709							1.16903	1								1.02383	1								0.851837	1								0.971263	1
P60953	Cell division control protein 42 homolog OS=Homo sapiens GN=CDC42 PE=1 SV=2 - [CDC42_HUMAN]	41.36	6	7	96	191	21.245	6.55127	1.02756	26	8.67656	1.06457	29	9.98362	1.04724	35	9.76897	0.961499	26	10.7266	1.01422	29	11.0105	1.03041	35	5.82049	1.06737	26	7.61943	1.07876	29	8.35254	0.925744	35	12.0842	0.930403	26	12.4758	0.924729	29	7.59746	1.03906	35	9.70869
Q9P016	Thymocyte nuclear protein 1 OS=Homo sapiens GN=THYN1 PE=1 SV=1 - [THYN1_HUMAN]	41.33	10	10	27	225	25.681	9.24658	0.980493	12	4.21546	0.956902	5	4.42851	0.985484	10	15.3559	1.02847	12	10.2041	0.985392	5	5.11288	1.00642	10	8.24266	1.01508	12	6.89345	0.99194	5	5.77383	1.11296	10	19.5183	1.00758	12	3.97126	1.03918	5	8.04425	0.944335	10	8.00801
Q9UBE0	SUMO-activating enzyme subunit 1 OS=Homo sapiens GN=SAE1 PE=1 SV=1 - [SAE1_HUMAN]	41.33	12	12	45	346	38.4256	5.30029	0.895259	13	12.1476	0.908548	15	14.0875	0.968964	17	14.1952	1.07173	13	8.7392	1.04229	15	11.0656	0.986279	17	6.40891	1.00453	13	8.52915	1.03547	15	2.90621	1.05666	17	10.9164	1.04325	13	11.8338	1.04448	15	2.67674	0.954224	17	7.35382
O43852	Calumenin OS=Homo sapiens GN=CALU PE=1 SV=2 - [CALU_HUMAN]	41.27	3	11	33	315	37.0835	4.64014	0.925108	3	1.0123	0.999451	2	13.8579	1.15293	2	16.6135	1.12634	3	0.882571	0.995934	2	12.6855	0.870764	2	11.1429	0.914959	3	0.0483009	1.01185	2	5.50698	1.12206	2	6.76074	1.09563	3	3.8264	0.985891	2	8.66815	0.88348	2	14.9459
Q9HB66	Alternative protein MKKS OS=Homo sapiens GN=MKKS PE=1 SV=1 - [Q9HB66_HUMAN]	41.27	2	2	3	63	7.25893	9.61279				1.04414	1		1.10544	2	4.59556				1.02681	1		0.97945	2	0.98291				0.910872	1		1.06817	2	0.716478				1.01662	1		0.855101	2	3.10927
Q8N995	cDNA FLJ38173 fis, clone FCBBF1000053, highly similar to HYDROXYMETHYLGLUTARYL-COA SYNTHASE, CYTOPLASMIC OS=Homo sapiens PE=2 SV=1 - [Q8N995_HUMAN]	41.26	18	19	105	509	56.2029	5.41455	1.00378	31	11.3374	1.09717	38	9.73052	1.42497	29	12.6964	1.00879	31	14.071	0.88497	38	8.03646	0.652232	29	25.7805	0.985281	31	12.77	1.03063	38	8.74576	1.33893	29	13.3708	1.06342	31	10.6997	0.988637	38	5.97201	0.712235	29	18.2913
D6R9D6	RNA-binding protein 47 OS=Homo sapiens GN=RBM47 PE=1 SV=1 - [D6R9D6_HUMAN]	41.22	12	12	30	393	43.9589	6.31592	0.988805	12	6.15478	0.978335	10	6.82091	0.986941	8	9.69849	0.96031	12	3.95676	0.967253	10	9.59829	0.973885	8	7.69047	1.03658	12	9.82554	1.03209	10	10.3548	1.09403	8	17.1764	1.01405	12	16.4509	0.988818	10	5.08368	0.927762	8	9.31316
O76021	Ribosomal L1 domain-containing protein 1 OS=Homo sapiens GN=RSL1D1 PE=1 SV=3 - [RL1D1_HUMAN]	41.22	22	22	93	490	54.9389	10.1255	1.2033	35	13.5835	1.41341	30	12.757	0.919634	28	14.4202	0.628018	35	31.808	0.496732	30	33.2161	1.12864	28	11.3481	1.3051	35	13.5591	1.37863	30	13.5386	0.764335	28	47.2229	0.607316	35	45.4726	0.666743	29	23.83	1.14062	28	13.603
Q06210	Glutamine--fructose-6-phosphate aminotransferase [isomerizing] 1 OS=Homo sapiens GN=GFPT1 PE=1 SV=3 - [GFPT1_HUMAN]	41.2	24	24	89	699	78.7563	7.10791	1.04672	37	8.21039	0.968583	19	6.6107	0.837035	33	12.5783	0.957597	37	12.7752	0.974754	19	5.57113	1.13767	33	6.97173	1.02859	37	9.04884	1.01283	19	7.29338	0.884946	33	13.5077	0.950715	37	9.51826	1.02561	19	7.00432	1.08416	33	9.70784
Q7L2H7	Eukaryotic translation initiation factor 3 subunit M OS=Homo sapiens GN=EIF3M PE=1 SV=1 - [EIF3M_HUMAN]	41.18	13	13	89	374	42.4758	5.63037	1.01473	48	13.3617	0.966354	25	7.77507	0.99559	16	12.0703	1.00269	48	15.2871	1.00379	25	7.72872	1.06228	16	7.22688	1.02746	48	5.65406	1.01193	25	5.62779	0.927853	16	13.3167	0.962401	48	11.249	1.00991	25	6.39248	1.01387	16	7.38024
Q96BS2	Calcineurin B homologous protein 3 OS=Homo sapiens GN=TESC PE=1 SV=3 - [CHP3_HUMAN]	41.12	7	7	17	214	24.7341	4.93213	1.0819	6	7.27802	1.05943	5	7.7939	1.10565	6	6.99498	0.870776	6	6.11017	0.964381	5	5.40425	1.0608	6	7.30197	1.04025	6	4.92886	1.08086	5	12.324	0.89216	6	12.8364	0.939618	6	8.48551	0.964673	5	11.9902	0.975007	6	10.1245
Q6NTA2	HNRNPL protein (Fragment) OS=Homo sapiens GN=HNRNPL PE=2 SV=2 - [Q6NTA2_HUMAN]	41.08	15	16	100	572	61.8881	7.38623	1.01276	38	6.21449	0.990207	30	7.87227	1.0072	26	6.87736	1.00386	38	7.34267	1.02717	30	10.6652	1.07251	26	10.2101	1.03	38	8.16346	1.00151	30	9.33859	0.925414	26	24.465	0.95204	38	8.0666	0.989306	30	5.41178	1.01322	26	11.2941
P05114	Non-histone chromosomal protein HMG-14 OS=Homo sapiens GN=HMGN1 PE=1 SV=3 - [HMGN1_HUMAN]	41	5	5	27	100	10.6526	9.59814	1.01342	10	4.98057	0.921656	9	8.96602	0.910286	8	12.3775	1.03476	10	9.99437	1.09259	9	7.38169	1.02048	8	6.91537	0.965315	10	7.12363	0.99918	9	4.39712	1.06365	8	16.3323	0.977144	10	6.66268	1.01481	9	4.33951	0.943484	8	8.42638
Q9BV40	Vesicle-associated membrane protein 8 OS=Homo sapiens GN=VAMP8 PE=1 SV=1 - [VAMP8_HUMAN]	41	4	4	18	100	11.431	7.34229	1.06605	7	4.95723	0.987229	5	4.76587	0.91354	6	5.45921	0.908448	7	12.5353	1.06119	5	3.59976	1.10357	6	6.45717	1.03957	7	7.29923	0.987862	5	8.42376	0.941364	6	2.04945	0.87527	7	13.9529	0.964825	5	5.29	0.982587	6	1.99484
O75223	Gamma-glutamylcyclotransferase OS=Homo sapiens GN=GGCT PE=1 SV=1 - [GGCT_HUMAN]	40.96	7	7	34	188	20.9943	5.13525	0.945951	10	11.8123	0.92776	12	8.12127	0.898831	12	12.3888	1.05968	10	7.94652	1.02931	12	6.65627	1.00644	12	9.56227	0.959491	10	8.53256	0.96421	12	7.45296	1.09875	12	9.06816	1.03729	10	12.557	1.05257	12	4.54425	0.973576	12	9.79592
A0A024R5M9	Nuclear mitotic apparatus protein 1, isoform CRA_a OS=Homo sapiens GN=NUMA1 PE=4 SV=1 - [A0A024R5M9_HUMAN]	40.93	70	71	264	2101	236.372	5.79541	1.02839	90	7.92218	1.07703	80	7.73985	1.05088	93	7.56422	1.03441	90	9.19098	1.02751	80	8.25514	0.976007	93	8.18302	0.997215	90	7.45785	0.95112	80	7.57729	1.016	93	10.4845	0.94238	90	11.2261	0.931091	80	7.69124	0.985906	93	12.1061
Q15084	Protein disulfide-isomerase A6 OS=Homo sapiens GN=PDIA6 PE=1 SV=1 - [PDIA6_HUMAN]	40.91	16	16	174	440	48.0913	5.08447	0.95554	51	7.68128	1.09299	66	9.05497	1.06197	57	7.53127	1.08927	51	12.0866	0.975683	66	6.57637	0.970329	57	7.38449	0.97516	51	7.8805	0.994071	66	8.85946	0.927723	57	14.7749	1.03171	51	8.21139	0.947363	66	6.11331	1.02945	57	10.5416
P52758	Ribonuclease UK114 OS=Homo sapiens GN=HRSP12 PE=1 SV=1 - [UK114_HUMAN]	40.88	4	4	11	137	14.4846	8.67529	0.954123	4	7.06922	0.975038	3	3.01691	1.06661	4	11.067	0.986204	4	13.3811	1.0382	3	1.49109	0.956661	4	17.6261	1.00237	4	9.12009	0.958473	3	1.47999	1.11889	4	37.7453	1.09635	4	13.4784	1.03478	3	7.31883	0.906968	4	9.19622
Q12792	Twinfilin-1 OS=Homo sapiens GN=TWF1 PE=1 SV=3 - [TWF1_HUMAN]	40.86	12	15	49	350	40.2577	6.96143	1.00415	18	7.08432	1.00345	11	2.47768	0.980092	11	12.9037	1.0007	18	2.70683	0.99863	11	7.68228	0.990488	11	13.534	1.00214	18	8.16718	0.989292	11	6.44325	0.97484	11	6.83648	0.934672	18	11.6347	1.01601	11	5.93642	1.0571	11	12.1222
B3KMN2	cDNA FLJ11695 fis, clone HEMBA1005019, highly similar to Homo sapiens SCC-112 protein (SCC-112), mRNA OS=Homo sapiens PE=2 SV=1 - [B3KMN2_HUMAN]	40.84	1	10	25	333	36.4385	8.74854	0.86149	3	4.88444				0.971486	1		1.39708	3	1.78542				1.09496	1		0.88214	3	3.95032				0.7526	1		0.980743	3	1.05574				1.16954	1
P31150	Rab GDP dissociation inhibitor alpha OS=Homo sapiens GN=GDI1 PE=1 SV=2 - [GDIA_HUMAN]	40.72	10	14	49	447	50.5501	5.13525	0.95428	7	1.69552	0.876503	13	6.76032	0.905706	11	10.8923	0.975144	7	10.502	0.977901	13	9.06908	1.04669	11	6.42318	0.988253	7	0.51809	1.08246	13	3.59847	1.03186	11	18.0707	1.13045	7	6.21945	1.08274	13	8.23582	1.02132	11	8.41551
D6R9P3	Heterogeneous nuclear ribonucleoprotein A/B OS=Homo sapiens GN=HNRNPAB PE=1 SV=1 - [D6R9P3_HUMAN]	40.71	10	12	135	280	30.284	7.91357	0.961139	36	14.5803	1.01332	36	10.8321	0.879818	31	23.9853	1.07553	36	20.1134	0.963954	36	10.7191	1.01111	31	8.19163	0.993885	36	7.31386	1.06223	36	8.38983	0.841912	31	21.5933	0.977211	36	19.5219	0.938718	36	13.4711	1.19497	31	16.121
P61313	60S ribosomal protein L15 OS=Homo sapiens GN=RPL15 PE=1 SV=2 - [RL15_HUMAN]	40.69	9	9	46	204	24.1311	11.6196	1.0962	16	7.41566	1.0795	14	7.48895	0.994812	16	10.7473	0.830752	16	11.9051	0.912423	14	6.61436	1.01912	16	11.4567	1.15159	16	5.30154	1.11564	14	9.24979	0.989633	16	15.4045	0.789666	16	14.7419	0.910511	14	7.93599	1.00859	16	9.11005
Q567R9	CIP29 protein OS=Homo sapiens GN=CIP29 PE=2 SV=1 - [Q567R9_HUMAN]	40.67	5	5	18	150	16.82	9.70068	1.05675	6	4.15684	0.9978	6	2.88687	0.940878	6	5.52178	0.971193	6	2.29145	0.98913	6	3.70718	1.08798	6	5.4739	1.01215	6	5.277	1.02754	6	8.5719	0.919064	6	12.8455	0.929305	6	2.94647	0.996044	6	4.45347	1.05795	6	7.94031
P42766	60S ribosomal protein L35 OS=Homo sapiens GN=RPL35 PE=1 SV=2 - [RL35_HUMAN]	40.65	7	8	47	123	14.5426	11.0483	1.07136	15	8.46466	1.12431	18	8.60812	0.97785	11	12.1902	0.891925	15	11.1574	0.823365	18	15.9626	1.06493	11	6.35076	1.10738	15	10.9747	1.212	18	18.9701	0.981515	11	11.9983	0.875528	15	16.3392	0.848253	18	17.775	0.992282	11	11.6659
A0A0K0K1H7	Aconitate hydratase, mitochondrial OS=Homo sapiens GN=HEL-S-284 PE=2 SV=1 - [A0A0K0K1H7_HUMAN]	40.64	24	24	95	780	85.511	7.72314	1.01839	40	7.38724	0.99277	26	7.64284	0.927663	29	8.8536	0.934316	40	10.8206	1.01163	26	6.58402	1.02588	29	12.8001	1.04209	40	8.22816	0.997329	26	8.80822	0.964734	29	12.078	0.981045	40	13.8369	1.0222	26	6.82206	1.07503	29	8.61504
P54886	Delta-1-pyrroline-5-carboxylate synthase OS=Homo sapiens GN=ALDH18A1 PE=1 SV=2 - [P5CS_HUMAN]	40.63	27	27	138	795	87.2475	7.12256	0.981604	54	8.0059	1.01755	41	8.18994	1.05257	42	10.8321	1.03538	54	13.0881	0.973899	41	7.19066	0.975404	42	8.49376	0.978368	54	7.37783	1.02627	41	5.77685	1.04041	42	17.5153	1.01638	54	9.03287	1.00111	41	5.74332	1.00476	42	11.4512
P35606	Coatomer subunit beta' OS=Homo sapiens GN=COPB2 PE=1 SV=2 - [COPB2_HUMAN]	40.62	33	33	103	906	102.422	5.2749	0.996599	35	8.74236	0.956505	33	6.51409	0.943783	35	7.88176	0.990017	35	7.87669	1.01506	33	6.00239	1.00323	35	5.93098	1.0288	35	8.41379	1.03987	33	5.88527	1.06497	35	14.3618	1.03774	35	12.5491	1.01904	33	4.48994	0.971445	35	13.6413
Q9NVP1	ATP-dependent RNA helicase DDX18 OS=Homo sapiens GN=DDX18 PE=1 SV=2 - [DDX18_HUMAN]	40.6	26	26	115	670	75.3594	9.49561	1.10974	37	7.03618	1.02604	34	7.73716	0.916151	44	12.1103	0.846358	37	10.921	0.988226	34	7.9001	1.11091	44	7.05298	1.11842	37	5.35284	1.01698	34	5.26269	0.907521	44	14.6779	0.81633	37	11.8566	0.96567	34	7.21862	1.06986	44	6.13789
P22676	Calretinin OS=Homo sapiens GN=CALB2 PE=2 SV=2 - [CALB2_HUMAN]	40.59	10	11	69	271	31.5196	5.14795	1.12774	32	9.95802	0.970741	14	7.32892	0.7975	22	16.4194	0.86574	32	14.0648	1.00077	14	6.49629	1.19095	22	12.8127	1.07003	32	10.8366	1.02931	14	4.53522	0.798769	22	21.277	0.887397	32	16.7543	1.02594	14	7.67947	1.14964	22	13.8793
B4DHD2	cDNA FLJ55458, highly similar to Programmed cell death 6-interacting protein OS=Homo sapiens PE=2 SV=1 - [B4DHD2_HUMAN]	40.56	1	28	93	683	75.8838	6.75635							0.816093	1								1.17879	1								0.567646	1								1.40416	1
B4DL86	6-phosphogluconate dehydrogenase, decarboxylating OS=Homo sapiens PE=2 SV=1 - [B4DL86_HUMAN]	40.56	1	17	91	429	47.4448	6.46826							0.913956	1								1.08465	1								0.880956	1								1.09809	1
E5KLM1	Mitochondrial dynamin-like 120 kDa protein OS=Homo sapiens PE=3 SV=1 - [E5KLM1_HUMAN]	40.52	36	36	120	997	115.839	7.86963	1.00808	46	7.2234	1.00223	36	6.51562	1.01223	38	8.75443	0.98649	46	11.1881	1.00027	36	6.83647	0.996501	38	10.2584	0.981949	46	6.44912	0.99474	36	6.55153	0.995664	38	18.307	1.02589	46	10.1152	0.995687	36	7.9484	0.972574	38	14.4189
Q9HCC0	Methylcrotonoyl-CoA carboxylase beta chain, mitochondrial OS=Homo sapiens GN=MCCC2 PE=1 SV=1 - [MCCB_HUMAN]	40.5	19	19	61	563	61.2944	7.6792	1.0043	20	3.3649	1.02778	21	7.59386	1.00893	20	6.62495	1.00342	20	10.282	1.01106	21	4.13709	1.02894	20	8.40504	1.00881	20	5.81148	0.982401	21	6.94926	0.954099	20	8.80377	0.970641	20	6.41372	1.00282	21	4.16902	1.01737	20	9.12326
E7ETK0	40S ribosomal protein S24 OS=Homo sapiens GN=RPS24 PE=1 SV=1 - [E7ETK0_HUMAN]	40.46	6	6	59	131	15.1873	10.8872	1.09377	27	9.33249	1.06582	16	6.19462	1.00468	16	8.99721	0.816005	27	13.5689	0.876523	16	7.97235	1.01479	16	7.80472	1.1151	27	6.74424	1.10581	16	5.86589	1.04264	16	5.68382	0.824926	27	12.0961	0.961091	16	4.87967	0.900946	16	8.23975
Q8NC51	Plasminogen activator inhibitor 1 RNA-binding protein OS=Homo sapiens GN=SERBP1 PE=1 SV=2 - [PAIRB_HUMAN]	40.44	19	19	125	408	44.9385	8.646	1.0473	43	5.46393	1.00699	40	8.33583	0.930839	42	9.44879	0.884196	43	12.0366	0.963411	40	8.41401	1.04188	42	7.11929	1.101	43	10.5128	1.02442	40	7.58065	0.974258	42	13.2691	0.891293	43	13.4537	0.993862	40	6.15524	1.00417	42	8.20916
Q9UL25	Ras-related protein Rab-21 OS=Homo sapiens GN=RAB21 PE=1 SV=3 - [RAB21_HUMAN]	40.44	8	8	33	225	24.3323	7.94287	0.984359	10	7.18023	0.99825	11	5.66762	0.99566	12	7.38562	1.01568	10	8.97793	1.02921	11	7.09015	1.05806	12	8.13047	1.01138	10	10.4641	1.01862	11	6.65725	0.87377	12	14.7545	1.0731	10	10.7755	1.03823	11	5.21333	1.00511	12	15.2211
F8VZJ2	Nascent polypeptide-associated complex subunit alpha OS=Homo sapiens GN=NACA PE=1 SV=1 - [F8VZJ2_HUMAN]	40.44	3	4	52	136	15.0068	4.90674	1.08689	12	6.72038	1.00375	9	10.5207	1.04887	9	12.2664	0.821706	12	16.6054	0.888046	9	7.29096	0.902391	9	7.42578	1.09074	12	8.06406	1.07356	9	5.0283	1.16892	9	6.1827	0.893829	12	16.8834	1.0076	9	3.75655	0.961397	9	7.09023
Q92499	ATP-dependent RNA helicase DDX1 OS=Homo sapiens GN=DDX1 PE=1 SV=2 - [DDX1_HUMAN]	40.41	26	26	149	740	82.3798	7.2251	1.05252	56	7.66307	0.993028	47	6.40769	0.95683	46	10.4649	0.976894	56	9.97782	1.01916	47	7.55806	1.08292	46	7.70124	1.01994	56	6.85331	0.994047	47	6.85308	0.876922	46	14.7642	0.939648	56	11.9091	0.991862	47	6.57938	1.05505	46	9.49114
P84090	Enhancer of rudimentary homolog OS=Homo sapiens GN=ERH PE=1 SV=1 - [ERH_HUMAN]	40.38	4	4	22	104	12.251	5.92236	1.05967	10	6.23336	0.975793	8	5.95204	0.868856	4	2.70189	0.95556	10	8.16118	1.08044	8	9.21968	1.04269	4	1.72795	1.07708	10	5.60571	0.972068	8	2.05902	1.03436	4	2.09672	0.908886	10	13.1607	0.988693	8	8.41983	0.987643	4	4.23406
Q16864	V-type proton ATPase subunit F OS=Homo sapiens GN=ATP6V1F PE=1 SV=2 - [VATF_HUMAN]	40.34	4	4	8	119	13.362	5.51611	0.979724	5	14.0593	0.923997	2	5.47256	0.920358	1		0.966643	5	14.3249	1.04688	2	1.16703	0.884835	1		1.04506	5	0.8285	0.978304	2	3.64035	1.14692	1		1.00453	5	8.54628	1.05961	2	9.5135	1.07265	1
H7C2K6	Band 4.1-like protein 1 (Fragment) OS=Homo sapiens GN=EPB41L1 PE=1 SV=1 - [H7C2K6_HUMAN]	40.3	1	9	24	268	29.1438	5.63037				1.00885	2	14.0456	0.992753	1					1.11776	2	23.4524	1.03269	1					0.87863	2	14.4303	1.1349	1					0.978928	2	3.24738	0.817592	1
P62826	GTP-binding nuclear protein Ran OS=Homo sapiens GN=RAN PE=1 SV=3 - [RAN_HUMAN]	40.28	9	9	84	216	24.4076	7.48877	1.0335	35	7.21256	0.941477	23	9.34359	0.879857	26	12.0779	0.973055	35	9.15426	1.05381	23	7.85563	1.07461	26	6.73681	1.00673	35	6.29742	1.00249	23	5.03724	1.0103	26	6.64602	0.957359	35	8.33454	1.00183	23	4.61855	1.02584	26	5.91351
Q86UY0	TXNDC5 protein OS=Homo sapiens GN=TXNDC5 PE=1 SV=1 - [Q86UY0_HUMAN]	40.28	14	14	73	360	40.3439	5.8335	1.01317	26	10.8081	1.08234	23	7.86783	1.05383	24	6.15235	1.00306	26	9.54587	0.958406	23	7.43982	0.934618	24	6.80128	0.999405	26	7.9615	0.972499	23	6.29524	1.03898	24	14.5128	0.964039	26	13.8	0.966502	23	5.98999	1.00031	24	10.4652
P09327	Villin-1 OS=Homo sapiens GN=VIL1 PE=1 SV=4 - [VILI_HUMAN]	40.27	30	30	86	827	92.6367	6.39209	1.01455	37	5.5175	1.0824	23	7.82284	1.12003	26	10.8122	1.00325	37	7.59199	1.03727	23	5.29654	0.97118	26	7.73269	1.01088	37	5.15403	0.94045	23	6.77418	1.07251	26	10.5784	0.975286	37	7.11169	0.956818	23	5.68357	0.941657	26	8.17249
Q9Y262	Eukaryotic translation initiation factor 3 subunit L OS=Homo sapiens GN=EIF3L PE=1 SV=1 - [EIF3L_HUMAN]	40.25	20	20	80	564	66.6844	6.34131	1.00487	27	8.15765	0.923061	28	11.3035	1.0326	25	8.26961	0.947527	27	17.7582	1.02449	28	8.32789	1.01503	25	11.0625	1.01835	27	7.80988	1.01854	28	5.56007	1.04221	25	11.1974	1.0097	27	15.2346	1.04084	28	6.1391	0.931983	25	21.3359
P84103	Serine/arginine-rich splicing factor 3 OS=Homo sapiens GN=SRSF3 PE=1 SV=1 - [SRSF3_HUMAN]	40.24	6	7	24	164	19.3179	11.6489	1.00843	5	7.44791	0.97117	3	0.981369	0.866401	7	16.257	0.876171	5	16.3116	1.05909	3	10.7346	1.04702	7	10.3201	1.12777	5	12.9345	0.93083	3	5.35001	1.08648	7	5.45717	0.899654	5	8.16184	1.0009	3	4.37543	1.0314	7	6.5019
B4DHN0	Mitogen-activated protein kinase OS=Homo sapiens PE=2 SV=1 - [B4DHN0_HUMAN]	40.23	9	13	41	348	40.3948	7.15186	0.997646	6	3.34934	0.902901	5	5.89494	1.0021	7	3.91924	0.962233	6	4.34709	1.01842	5	3.5687	0.918065	7	6.07928	1.03678	6	3.2883	1.00859	5	7.20824	1.10352	7	15.3751	1.02545	6	11.2522	1.05114	5	4.43158	0.9521	7	11.1193
A0A0A0MRM8	Unconventional myosin-VI OS=Homo sapiens GN=MYO6 PE=1 SV=1 - [A0A0A0MRM8_HUMAN]	40.22	47	47	151	1253	144.924	8.55811	0.951143	54	8.96774	1.00894	53	6.97379	1.04182	44	8.92256	1.04385	54	8.06533	0.996605	53	7.15049	0.94949	44	8.48373	0.974211	54	7.63051	1.01418	53	7.07756	1.08245	44	10.8346	1.06791	54	8.46753	1.00834	53	4.73006	0.926086	44	8.83439
Q96B26	Exosome complex component RRP43 OS=Homo sapiens GN=EXOSC8 PE=1 SV=1 - [EXOS8_HUMAN]	40.22	7	7	15	276	30.0203	5.30029	1.06618	5	0.630747	0.955875	3	0.334833	0.966944	7	7.18921	0.857193	5	1.05501	1.05243	3	1.11056	1.0355	7	7.37587	1.09958	5	2.79374	1.04923	3	8.12679	0.963253	6	8.84056	0.900777	5	5.17603	0.991177	3	7.70003	1.0282	7	4.38372
Q96EK6	Glucosamine 6-phosphate N-acetyltransferase OS=Homo sapiens GN=GNPNAT1 PE=1 SV=1 - [GNA1_HUMAN]	40.22	6	6	28	184	20.7356	7.98682	0.977496	8	14.6724	1.00748	12	15.6634	0.952652	8	10.2255	1.04021	8	38.063	0.923618	12	19.9852	1.04047	8	7.38772	0.973049	8	13.554	1.05963	12	13.8885	0.838286	8	36.3193	0.976092	8	5.90943	0.998414	12	14.4693	1.03594	8	31.8276
Q13838	Spliceosome RNA helicase DDX39B OS=Homo sapiens GN=DDX39B PE=1 SV=1 - [DX39B_HUMAN]	40.19	7	19	142	428	48.9599	5.66846	0.974823	13	4.57739	0.984375	17	5.04897	0.934803	10	12.2771	1.00869	13	6.23856	0.995357	17	10.022	1.04391	10	10.5504	0.992992	13	4.1807	1.07313	17	9.05595	0.992832	10	14.6854	1.00895	13	14.6003	0.959086	17	7.43359	1.01436	10	7.18373
B7Z7P8	Eukaryotic peptide chain release factor subunit 1 OS=Homo sapiens GN=ETF1 PE=1 SV=1 - [B7Z7P8_HUMAN]	40.19	15	15	86	423	47.4462	5.56689	1.02209	30	6.14112	0.984294	26	6.58344	0.963941	30	11.9575	0.978214	30	11.9121	1.00075	26	9.04109	1.09074	30	7.26563	1.01251	30	7.0515	1.02285	26	7.42707	0.932785	30	29.2027	0.992643	30	12.0305	1.01891	26	8.14134	1.0051	30	13.021
B2RBA6	DNA helicase OS=Homo sapiens PE=2 SV=1 - [B2RBA6_HUMAN]	40.19	27	27	107	719	81.2286	6.45557	1.02053	39	6.8463	0.995274	35	6.2778	1.06258	33	11.5606	0.939402	39	9.22707	1.04902	35	7.88773	0.940953	33	8.6074	1.03218	39	7.45725	0.975075	35	6.36791	1.04816	33	14.632	0.973769	39	13.6592	0.981841	35	7.91414	0.936278	33	10.463
P15559	NAD(P)H dehydrogenase [quinone] 1 OS=Homo sapiens GN=NQO1 PE=1 SV=1 - [NQO1_HUMAN]	40.15	13	13	204	274	30.848	8.88037	0.854916	65	12.6393	0.908494	76	8.32856	1.03805	63	13.5973	1.15535	65	11.8983	0.981817	76	9.2895	0.954649	63	12.1442	0.932845	65	7.85895	1.08293	76	7.46324	0.974308	63	17.7215	1.16657	65	11.8459	1.05062	76	6.45671	0.996047	63	15.9816
O75489	NADH dehydrogenase [ubiquinone] iron-sulfur protein 3, mitochondrial OS=Homo sapiens GN=NDUFS3 PE=1 SV=1 - [NDUS3_HUMAN]	40.15	9	9	35	264	30.2227	7.50342	1.00085	9	6.27108	1.01492	12	5.98474	0.991053	14	5.7095	0.884112	9	12.4564	1.02416	12	4.8999	1.06153	14	7.66456	1.05515	9	8.26258	1.02018	12	14.7095	0.841709	14	15.7673	0.98842	9	7.11187	0.946785	12	3.83131	1.05343	14	7.99303
P11387	DNA topoisomerase 1 OS=Homo sapiens GN=TOP1 PE=1 SV=2 - [TOP1_HUMAN]	40.13	30	31	109	765	90.6689	9.30518	1.00912	33	6.24407	0.957029	32	9.79795	0.932148	42	8.92647	0.971054	33	8.55404	1.02707	32	9.44351	1.01003	42	7.34944	1.0075	33	10.1918	0.972979	32	6.4146	1.00137	42	11.5918	0.98286	33	9.33165	1.02018	32	6.23407	1.01019	42	6.30364
Q9BWF3	RNA-binding protein 4 OS=Homo sapiens GN=RBM4 PE=1 SV=1 - [RBM4_HUMAN]	40.11	2	14	51	364	40.2887	7.07861	1.04025	3	0.643862	1.01006	3	6.09117	0.919583	4	10.3614	0.93149	3	1.51463	0.979062	3	11.4989	0.923724	4	8.15814	0.952943	3	1.6331	0.948834	3	4.9348	0.956377	4	8.06415	1.04096	3	8.7579	1.03055	3	2.12531	1.17639	4	6.09712
P00374	Dihydrofolate reductase OS=Homo sapiens GN=DHFR PE=1 SV=2 - [DYR_HUMAN]	40.11	6	6	17	187	21.439	7.41553	1.04945	7	7.84211	0.968203	4	6.66492	0.997729	6	3.86537	0.866771	7	21.3984	0.970202	4	7.68354	0.935896	6	5.58182	1.14989	7	5.77948	1.0187	4	9.74252	1.14524	6	2.47701	0.857482	7	7.99226	0.988927	4	1.70738	0.869686	6	7.9894
K7ER90	Eukaryotic translation initiation factor 3 subunit G (Fragment) OS=Homo sapiens GN=EIF3G PE=1 SV=1 - [K7ER90_HUMAN]	40.09	1	8	21	227	25.4258	5.49072	0.917577	2	13.1004	0.986375	1		1.00994	1		1.14827	2	10.0583	0.997707	1		1.10981	1		0.83604	2	3.67573	0.874667	1		0.712264	1		1.22261	2	9.17109	1.14151	1		1.15708	1
Q5VWZ2	Lysophospholipase-like protein 1 OS=Homo sapiens GN=LYPLAL1 PE=1 SV=3 - [LYPL1_HUMAN]	40.08	8	8	18	237	26.2994	7.84033	1.03596	8	7.98253	1.0397	4	5.48108	0.944149	6	13.9058	0.917373	8	14.3849	0.943387	4	10.3053	1.10771	6	3.38701	1.01682	8	6.18196	1.05055	4	7.17895	0.88327	6	10.9946	0.998756	8	11.9969	0.978364	4	1.61592	0.987519	6	7.7616
Q9H0B6	Kinesin light chain 2 OS=Homo sapiens GN=KLC2 PE=1 SV=1 - [KLC2_HUMAN]	40.03	14	22	46	622	68.8923	7.15186	1.06438	17	4.32542	0.948279	7	8.44851	0.864554	9	8.82023	0.890185	17	10.079	1.00776	7	9.19483	1.00405	9	8.1961	1.0418	17	4.70864	0.992981	7	4.94381	0.967223	9	8.76978	0.947804	17	6.43272	1.03956	7	1.94365	1.10653	9	11.436
P21333	Filamin-A OS=Homo sapiens GN=FLNA PE=1 SV=4 - [FLNA_HUMAN]	40.01	74	81	279	2647	280.564	6.06201	1.05425	104	6.95526	0.996251	57	6.02821	0.941305	77	10.9417	0.913912	104	10.6916	1.04175	57	5.76096	1.04408	77	8.03281	1.05473	104	7.45027	0.959077	57	5.76386	0.971198	77	8.04555	0.928181	104	10.7743	0.992728	57	7.53484	1.03779	77	7.72839
B4DL06	cDNA FLJ59565, highly similar to Beta-catenin OS=Homo sapiens PE=2 SV=1 - [B4DL06_HUMAN]	39.92	18	24	118	739	80.775	6.0874	1.00585	32	6.34615	1.03413	27	7.17219	1.03228	22	12.0957	0.944084	32	9.13093	0.982667	27	4.90477	1.02567	22	4.47643	1.01607	32	6.87855	0.975318	27	7.09899	0.872172	22	30.481	0.980187	32	9.04752	0.999813	27	8.57539	1.06189	22	19.6192
P48047	ATP synthase subunit O, mitochondrial OS=Homo sapiens GN=ATP5O PE=1 SV=1 - [ATPO_HUMAN]	39.91	7	7	43	213	23.2627	9.96436	1.00138	16	6.46542	0.991838	15	7.87139	0.961694	12	4.13079	1.01502	16	7.6022	1.00797	15	6.95258	1.03881	12	3.92944	0.964046	16	4.43753	1.01693	15	5.96002	0.935919	12	9.58178	1.02271	16	8.37293	1.00762	15	5.55713	1.04582	12	9.28839
Q6P582	Mitotic-spindle organizing protein 2A OS=Homo sapiens GN=MZT2A PE=1 SV=2 - [MZT2A_HUMAN]	39.87	5	5	12	158	16.2105	9.64209	1.01106	8	4.4461	1.11242	2	12.1872	1.15968	2	4.75133	1.03322	8	6.45263	0.90347	2	6.6888	1.05997	2	0.206864	1.02368	8	6.27293	1.04081	2	2.5455	0.49279	2	25.5495	0.954658	8	15.7179	0.92425	2	12.535	1.30739	2	14.6206
P55769	NHP2-like protein 1 OS=Homo sapiens GN=SNU13 PE=1 SV=3 - [NH2L1_HUMAN]	39.84	5	5	36	128	14.1646	8.45557	1.04011	15	5.14514	1.02701	10	6.65316	0.954944	11	9.45519	0.910988	15	8.41657	1.0175	10	12.8419	1.03411	11	16.6016	1.06298	15	5.08244	1.01995	10	8.77111	0.912905	11	9.72063	0.956216	15	10.5869	0.928335	10	5.95376	1.07763	11	6.15656
Q96I99	Succinate--CoA ligase [GDP-forming] subunit beta, mitochondrial OS=Homo sapiens GN=SUCLG2 PE=1 SV=2 - [SUCB2_HUMAN]	39.81	15	15	40	432	46.4814	6.39209	1.08877	11	3.014	1.0052	13	7.74349	0.960851	16	9.25793	0.941438	11	6.62087	0.999483	13	3.82805	1.01822	16	11.7882	0.999602	11	7.03592	0.963758	13	6.3072	0.965126	16	12.9663	0.898065	11	2.5264	0.976448	13	8.88427	1.06052	16	9.07117
Q16836	Hydroxyacyl-coenzyme A dehydrogenase, mitochondrial OS=Homo sapiens GN=HADH PE=1 SV=3 - [HCDH_HUMAN]	39.81	12	12	64	314	34.2719	8.85107	0.949853	27	6.96172	1.04206	20	7.81324	1.0395	17	5.14727	1.11756	27	10.3022	1.00982	20	7.24811	0.956507	17	10.5468	0.987841	27	6.79955	1.00162	20	16.5305	1.17277	17	13.8541	1.03415	27	10.3247	0.969547	20	12.7006	0.937026	17	16.2808
Q9UJ72	Annexin A10 OS=Homo sapiens GN=ANXA10 PE=1 SV=3 - [ANX10_HUMAN]	39.81	11	11	66	324	37.2529	5.32568	1.01828	27	10.7883	0.942505	18	5.39341	0.91556	21	11.8787	0.918587	27	15.9142	0.970919	18	8.7055	1.11727	21	12.551	1.02081	27	10.1734	1.0631	18	7.67668	0.874137	21	20.9502	1.00371	27	14.3515	1.02887	18	4.90803	1.05772	21	22.53
H3BR35	Eukaryotic peptide chain release factor GTP-binding subunit ERF3A (Fragment) OS=Homo sapiens GN=GSPT1 PE=1 SV=1 - [H3BR35_HUMAN]	39.79	8	19	80	475	52.9087	5.63037	1.00649	10	17.9114	0.928168	9	4.72244	0.927435	4	6.98826	1.05265	10	13.9296	1.03438	9	5.30582	1.00604	4	8.12344	1.00508	10	5.40329	0.997225	9	9.71626	1.08822	4	9.20461	1.01835	10	8.38934	1.04792	9	8.42552	0.960873	4	4.13349
Q13442	28 kDa heat- and acid-stable phosphoprotein OS=Homo sapiens GN=PDAP1 PE=1 SV=1 - [HAP28_HUMAN]	39.78	9	9	31	181	20.6176	8.86572	1.02534	9	5.20867	1.01364	10	1.03152	0.968843	12	12.4347	0.958396	9	5.46833	0.995654	10	5.16542	1.06677	12	10.4164	1.04517	9	5.69328	1.00752	10	5.7382	0.985218	12	8.31328	0.899358	9	12.5165	0.98086	10	8.02086	0.996454	12	5.57762
A0A024RB10	Cyclin-dependent kinase 2, isoform CRA_a OS=Homo sapiens GN=CDK2 PE=3 SV=1 - [A0A024RB10_HUMAN]	39.77	7	9	28	264	30.0161	9.14404	0.997604	7	4.72312	0.962814	6	6.27436	1.02356	5	3.50614	1.01585	7	5.0359	1.0078	6	13.3177	0.931493	5	6.66374	1.025	7	3.57134	0.971504	6	3.87135	0.933353	5	18.3787	0.947499	7	2.59289	0.972568	6	8.91627	1.01176	5	10.7893
E5KN59	Peptidyl-prolyl cis-trans isomerase D OS=Homo sapiens PE=4 SV=1 - [E5KN59_HUMAN]	39.73	15	16	38	370	40.7379	7.21045	1.01558	18	8.23679	0.970928	7	11.0539	0.964896	11	8.81804	1.00755	18	6.71953	1.07746	7	3.359	1.00368	11	7.38572	0.988655	18	4.66502	0.961324	7	4.2656	1.05559	11	17.8751	0.982791	18	11.169	1.0134	7	4.57343	0.969539	11	7.47076
P48506	Glutamate--cysteine ligase catalytic subunit OS=Homo sapiens GN=GCLC PE=1 SV=2 - [GSH1_HUMAN]	39.72	20	21	87	637	72.7193	6.0874	0.847775	32	11.3652	0.859282	27	6.8632	0.97311	26	12.821	1.15498	32	8.84313	0.962748	27	5.51838	0.940843	26	11.6432	0.912158	32	7.63397	1.05946	27	5.02568	1.13706	26	29.2298	1.2276	32	10.7243	1.09654	27	4.13215	1.04709	26	16.0535
H0YNG9	Calcineurin B homologous protein 1 OS=Homo sapiens GN=CHP1 PE=1 SV=1 - [H0YNG9_HUMAN]	39.61	5	5	9	154	17.9762	5.66846	0.972419	2	1.58623	1.00977	3	2.26709	0.946852	4	9.55456	1.01916	2	2.81222	0.965835	3	8.01423	0.92019	4	9.91609	0.984396	2	2.08549	0.997917	3	0.290674	1.13812	4	6.74465	1.05964	2	7.31185	1.02872	3	7.92027	0.911091	4	14.2478
C9JA93	TBC1 domain family member 15 (Fragment) OS=Homo sapiens GN=TBC1D15 PE=1 SV=1 - [C9JA93_HUMAN]	39.57	1	9	28	278	32.1165	8.83643	0.967652	1		0.993097	1		1.00572	1		0.986519	1		0.938694	1		0.961314	1		1.0375	1		1.10337	1		0.87144	1		1.02288	1		0.968346	1		1.18853	1
A0A140VJF3	Testicular tissue protein Li 27 OS=Homo sapiens PE=2 SV=1 - [A0A140VJF3_HUMAN]	39.57	12	12	29	326	36.9311	6.84424	1.05059	12	5.25641	1.04528	7	4.39108	0.92453	10	6.81051	0.927469	12	5.72932	1.07802	7	4.66885	1.05189	10	4.4977	1.02972	12	4.88939	0.937289	7	4.52078	1.06016	10	10.2565	0.958709	12	8.19054	0.973301	7	1.92008	1.00809	10	4.95985
B4DJB4	Isocitrate dehydrogenase [NAD] subunit, mitochondrial OS=Homo sapiens PE=2 SV=1 - [B4DJB4_HUMAN]	39.56	13	13	44	316	34.4834	6.44287	0.96955	18	5.98906	0.955827	15	6.65662	0.899042	11	11.3707	1.0399	18	8.81168	1.06008	15	7.55113	1.03623	11	7.05325	0.965468	18	7.33417	0.949546	15	4.46027	0.987982	11	9.00477	1.09258	18	17.9087	1.04436	15	5.8962	1.04833	11	5.53561
P09874	Poly [ADP-ribose] polymerase 1 OS=Homo sapiens GN=PARP1 PE=1 SV=4 - [PARP1_HUMAN]	39.55	38	38	143	1014	113.012	8.88037	1.01526	62	7.60391	1.00392	32	4.64391	0.955317	49	14.2243	0.997997	62	9.16759	1.01351	32	8.01014	1.0808	49	8.92255	1.01728	62	7.1182	0.986574	32	9.22539	0.960154	49	15.3185	0.966146	62	13.6034	1.00021	32	7.07656	1.00882	49	9.67647
P78346	Ribonuclease P protein subunit p30 OS=Homo sapiens GN=RPP30 PE=1 SV=1 - [RPP30_HUMAN]	39.55	8	8	17	268	29.3027	8.90967	0.985255	6	4.20481	0.988764	4	20.0753	0.95793	7	6.90642	1.06714	6	8.31897	0.976585	4	6.61506	1.02864	7	3.30941	0.9338	6	7.70664	0.984954	4	4.86581	0.913323	7	6.85853	1.09539	6	8.87947	1.0292	4	12.542	1.07692	7	6.49383
A0A024RDF4	Heterogeneous nuclear ribonucleoprotein D (AU-rich element RNA binding protein 1, 37kDa), isoform CRA_e OS=Homo sapiens GN=HNRPD PE=4 SV=1 - [A0A024RDF4_HUMAN]	39.54	2	15	168	306	32.8141	8.1626	1.18901	2	1.04748	1.1022	1		1.02465	2	30.2643	0.740513	2	1.3407	0.693523	1		0.82798	2	44.7511	1.1807	2	3.97026	1.32148	1		1.20934	2	29.3014	0.721562	2	10.4436	0.868983	1		0.883648	2	20.922
P10606	Cytochrome c oxidase subunit 5B, mitochondrial OS=Homo sapiens GN=COX5B PE=1 SV=2 - [COX5B_HUMAN]	39.53	5	5	28	129	13.6869	8.80713	0.971125	9	4.98528	0.953325	9	4.5494	1.05148	10	3.01685	1.05357	9	6.81137	1.04216	9	5.69981	0.96443	10	2.52227	0.936946	9	4.70614	0.95667	9	4.38148	1.07718	10	3.94648	1.05486	9	3.27946	1.01625	9	7.33496	0.917843	10	4.59003
B4DUD6	cDNA FLJ54551, highly similar to Septin-7 OS=Homo sapiens PE=2 SV=1 - [B4DUD6_HUMAN]	39.51	14	15	69	410	47.8507	8.73389	1.01159	19	5.1294	0.978492	16	5.81833	0.945254	16	8.07648	0.965071	19	8.3728	1.03221	16	2.88457	0.957234	16	7.3336	1.05252	19	3.40442	1.01762	16	4.90148	1.12245	16	4.80229	0.965867	19	5.90558	1.00114	16	6.8813	0.964365	16	4.95632
P49585	Choline-phosphate cytidylyltransferase A OS=Homo sapiens GN=PCYT1A PE=1 SV=2 - [PCY1A_HUMAN]	39.51	12	12	33	367	41.7048	7.25439	0.925409	14	8.04995	0.960583	11	6.67539	1.01764	8	9.78648	1.09998	14	10.0736	1.05081	11	8.86412	0.911648	8	9.50051	0.930906	14	6.98103	0.975961	11	6.62825	1.15334	8	8.53835	1.10496	14	7.99887	1.03972	11	5.7569	0.907475	8	11.57
Q53GS9	U4/U6.U5 tri-snRNP-associated protein 2 OS=Homo sapiens GN=USP39 PE=1 SV=2 - [SNUT2_HUMAN]	39.47	19	19	52	565	65.3397	8.90967	1.04649	19	6.52376	1.02303	18	11.6194	1.02978	15	12.9112	1.00833	19	16.9047	1.00363	18	5.77518	1.05756	15	6.8304	0.998601	19	9.64661	1.04876	18	7.78352	0.971776	15	37.8134	0.907846	19	8.99831	0.963163	18	11.8011	0.953747	15	19.7241
B2R960	cDNA, FLJ94230, highly similar to Homo sapiens thioredoxin-like 1 (TXNL1), mRNA OS=Homo sapiens PE=2 SV=1 - [B2R960_HUMAN]	39.45	8	8	27	289	32.2167	4.95752	1.03532	8	4.15351	1.01876	10	7.25688	1.04577	9	10.1114	1.0602	8	14.0429	0.99669	10	6.19403	1.05973	9	4.43759	1.00543	8	8.67914	1.01369	10	3.70251	0.71669	9	27.4934	0.928706	8	12.4061	0.943385	10	8.52888	1.12123	9	7.09068
P30048	Thioredoxin-dependent peroxide reductase, mitochondrial OS=Homo sapiens GN=PRDX3 PE=1 SV=3 - [PRDX3_HUMAN]	39.45	7	7	30	256	27.6752	7.78174	1.00554	10	5.26677	0.995119	14	8.23872	0.939161	6	1.46942	1.07408	10	13.3323	0.999275	14	8.02515	1.04396	6	7.29314	0.965026	10	7.76159	0.978084	14	4.67156	0.968743	6	14.7749	1.00436	10	11.8619	1.02914	14	6.66459	0.977388	6	1.98457
P38919	Eukaryotic initiation factor 4A-III OS=Homo sapiens GN=EIF4A3 PE=1 SV=4 - [IF4A3_HUMAN]	39.42	16	19	116	411	46.8412	6.72705	1.04177	32	5.25298	0.961744	26	9.81838	1.00026	26	12.9073	0.921425	32	10.6789	1.05454	26	7.14965	1.02462	26	10.398	1.03106	32	6.76317	0.983693	26	6.82917	1.01188	26	16.5382	0.988586	32	12.3418	1.0053	26	5.49263	0.966035	26	9.31023
P22102	Trifunctional purine biosynthetic protein adenosine-3 OS=Homo sapiens GN=GART PE=1 SV=1 - [PUR2_HUMAN]	39.41	29	34	130	1010	107.699	6.69775	0.990274	46	8.07525	0.978423	32	7.24261	1.00215	30	14.6023	0.998597	46	10.7876	1.01452	32	4.91293	1.03738	30	16.8414	1.0011	46	10.069	1.02109	32	6.52155	0.91961	30	36.3917	1.01314	46	7.31989	1.0009	32	6.0643	1.01647	30	7.81664
P49257	Protein ERGIC-53 OS=Homo sapiens GN=LMAN1 PE=1 SV=2 - [LMAN1_HUMAN]	39.41	20	20	67	510	57.513	6.771	0.974665	21	6.56577	1.00318	23	6.60038	1.00776	23	7.95799	1.02193	21	17.9327	0.965149	23	8.40843	0.976915	23	5.73649	0.970971	21	7.78567	1.02655	23	14.4244	1.05235	23	11.8094	0.998441	21	8.09533	0.969789	23	10.2858	0.978513	23	11.4136
Q13707	ACTA2 protein (Fragment) OS=Homo sapiens GN=ACTA2 PE=3 SV=1 - [Q13707_HUMAN]	39.39	2	12	584	330	36.7832	5.35107	0.926166	17	6.57004	1.0386	18	8.88233	1.07934	16	8.20973	1.17506	17	9.9323	1.04017	18	10.2123	0.905341	16	14.0958	0.934486	17	9.53475	1.01158	18	7.40806	0.813649	16	16.9765	1.01769	17	9.9754	0.912372	18	5.31632	1.23149	16	18.7727
Q96A08	Histone H2B type 1-A OS=Homo sapiens GN=HIST1H2BA PE=1 SV=3 - [H2B1A_HUMAN]	39.37	1	5	235	127	14.1587	10.3159	1.03555	1								0.890574	1								1.11945	1								0.896102	1
E7ES08	High mobility group protein B3 (Fragment) OS=Homo sapiens GN=HMGB3 PE=1 SV=1 - [E7ES08_HUMAN]	39.36	4	8	24	188	21.4309	9.51025	1.07441	4	1.66757	1.02345	4	5.62764	0.979901	6	16.4702	0.993247	4	1.14215	1.03337	4	9.59081	1.08101	6	14.0243	0.954435	4	1.12317	1.02873	4	1.45739	0.971124	6	21.9961	0.987902	4	5.04747	0.955018	4	1.0822	0.953948	6	11.4118
P26373	60S ribosomal protein L13 OS=Homo sapiens GN=RPL13 PE=1 SV=4 - [RL13_HUMAN]	39.34	9	9	79	211	24.2465	11.6489	1.1263	23	5.50664	1.09126	25	9.6749	0.967308	31	7.03606	0.809507	23	13.5046	0.849599	25	10.2353	1.01315	31	9.54769	1.11578	23	6.01921	1.18202	25	8.78017	0.999769	31	21.2948	0.791701	23	13.6523	0.876664	25	8.11348	0.993997	31	10.3669
Q2VIN3	RBM1 (Fragment) OS=Homo sapiens PE=4 SV=1 - [Q2VIN3_HUMAN]	39.32	4	17	77	384	41.4399	9.83252	1.01242	3	11.1261	1.03696	3	3.77002	0.974326	4	3.73168	0.987653	3	5.69145	1.04672	3	0.331116	1.03473	4	4.32565	0.950839	3	15.9057	0.947904	3	1.21002	0.954567	4	9.59962	0.999507	3	20.9346	0.944503	3	0.550532	1.03775	4	1.86253
Q9NWU5	39S ribosomal protein L22, mitochondrial OS=Homo sapiens GN=MRPL22 PE=1 SV=1 - [RM22_HUMAN]	39.32	7	7	21	206	23.6256	9.93506	1.01967	6	2.87443	1.00514	7	5.21799	1.02753	8	6.15831	1.00841	6	3.34123	1.02948	7	5.28052	0.975689	8	4.07003	1.01388	6	5.44444	0.988095	7	1.98493	1.05575	8	8.08622	0.968281	6	4.42299	0.992371	7	3.51444	0.98644	8	2.85756
Q2NLC8	GSTK1 protein (Fragment) OS=Homo sapiens GN=GSTK1 PE=2 SV=1 - [Q2NLC8_HUMAN]	39.31	6	6	21	173	19.3722	8.68994	0.952658	11	4.95254	1.05871	5	1.52733	0.992688	5	3.5342	1.11725	11	6.54351	0.975869	5	4.93565	1.00311	5	10.3048	0.933788	11	8.44422	1.02741	5	1.38554	0.957143	5	13.2322	1.0158	11	3.44661	0.920813	5	2.85592	0.992326	5	5.36777
P43487	Ran-specific GTPase-activating protein OS=Homo sapiens GN=RANBP1 PE=1 SV=1 - [RANG_HUMAN]	39.3	8	8	43	201	23.2956	5.2876	1.02925	21	13.9644	0.952497	10	4.58948	0.845047	12	20.028	0.971678	21	22.4544	1.02601	10	5.98204	1.07432	12	8.54092	1.02908	21	14.65	1.03555	10	11.9264	0.982727	12	5.98596	0.941701	21	14.0678	0.978068	10	6.36337	1.08807	12	9.74641
P42677	40S ribosomal protein S27 OS=Homo sapiens GN=RPS27 PE=1 SV=3 - [RS27_HUMAN]	39.29	2	4	29	84	9.45484	9.45166	1.11696	6	8.12724	1.08648	2	10.8104	0.916665	4	5.74453	0.852297	6	9.83096	0.828774	2	11.658	1.01166	4	6.28609	1.08601	6	4.76063	1.04637	2	5.60098	1.06345	4	4.01889	0.831827	6	9.62194	1.01716	2	9.18672	1.01988	4	7.46263
Q71UM5	40S ribosomal protein S27-like OS=Homo sapiens GN=RPS27L PE=1 SV=3 - [RS27L_HUMAN]	39.29	2	4	22	84	9.47087	9.45166	1.0505	3	5.0329	0.765584	1		0.604385	1		0.717287	3	21.5936	0.562038	1		0.883159	1		0.981117	3	3.94827	0.868886	1		1.19205	1		1.20443	3	17.8004	1.79468	1		1.32398	1
Q9GZL7	Ribosome biogenesis protein WDR12 OS=Homo sapiens GN=WDR12 PE=1 SV=2 - [WDR12_HUMAN]	39.24	13	13	24	423	47.6777	5.89697	1.06899	11	5.99829	0.982605	5	1.0583	0.92627	8	3.17186	0.963598	11	6.18524	1.00002	5	0.388931	1.12438	8	5.07752	1.01827	11	8.86667	1.01223	5	5.93642	0.92601	8	15.4432	0.960412	11	10.2829	1.02297	5	3.52359	0.98858	8	8.90552
B4E312	cDNA FLJ53422, highly similar to TATA-binding protein-associated factor 2N OS=Homo sapiens PE=2 SV=1 - [B4E312_HUMAN]	39.24	7	9	71	395	40.0542	9.46631	0.969752	10	6.85019	0.979786	11	10.5212	0.984783	8	9.66184	1.0075	10	5.61459	1.05351	11	8.52513	0.986515	8	6.91612	1.01455	10	4.57654	0.947346	11	4.64841	1.03593	8	14.1335	0.996869	10	4.57945	1.00837	11	5.1726	0.98158	8	3.95515
P17174	Aspartate aminotransferase, cytoplasmic OS=Homo sapiens GN=GOT1 PE=1 SV=3 - [AATC_HUMAN]	39.23	13	13	57	413	46.2185	7.00537	0.976236	25	11.1298	0.993414	14	6.99048	0.908733	18	7.14219	0.962867	25	10.0998	0.975423	14	6.66017	1.11825	18	10.1221	1.02842	25	9.55197	1.05439	14	5.50825	0.819056	18	18.3621	0.97819	25	14.7527	0.977822	14	9.97855	1.0768	18	18.0963
Q7Z4Y4	GTP:AMP phosphotransferase AK3, mitochondrial OS=Homo sapiens GN=AK3 PE=2 SV=1 - [Q7Z4Y4_HUMAN]	39.21	9	9	22	227	25.6046	9.30518	1.00335	7	7.26958	0.938189	7	5.77582	0.985465	8	13.3694	1.01542	7	11.691	1.03174	7	9.11021	1.02483	8	7.99341	0.922249	7	7.79809	0.977763	7	5.21292	1.04955	8	12.9113	1.04783	7	15.7915	1.04402	7	3.7096	0.961969	8	10.1548
A0A0S4XQV4	MHC class I antigen OS=Homo sapiens GN=HLA-A PE=3 SV=1 - [A0A0S4XQV4_HUMAN]	39.18	0	9	23	365	40.7911	6.34131
P41250	Glycine--tRNA ligase OS=Homo sapiens GN=GARS PE=1 SV=3 - [SYG_HUMAN]	39.11	29	29	157	739	83.1126	7.03467	1.03429	48	6.99135	1.03637	50	11.9974	0.876541	59	14.1578	0.894668	48	13.1491	0.958965	50	9.21054	1.14148	59	10.1293	1.0696	48	7.12442	1.04713	50	9.35264	0.806647	59	28.3447	0.903965	48	7.31349	0.927264	50	18.067	1.13691	59	14.9066
O00764	Pyridoxal kinase OS=Homo sapiens GN=PDXK PE=1 SV=1 - [PDXK_HUMAN]	39.1	11	11	39	312	35.0799	6.12549	1.01935	10	10.7082	1.02636	12	8.02535	0.928576	17	14.6837	1.02282	10	17.6454	0.96774	12	6.40899	1.06267	17	10.3325	0.965712	10	20.8648	1.06187	12	8.48143	0.860234	17	14.3107	0.94573	10	21.2012	0.955351	12	9.02669	1.04712	17	9.40661
Q13153	Serine/threonine-protein kinase PAK 1 OS=Homo sapiens GN=PAK1 PE=1 SV=2 - [PAK1_HUMAN]	39.08	8	15	38	545	60.6087	5.75732	0.984281	6	8.21487	1.00078	5	6.73017	1.02112	4	8.34365	1.05407	6	4.89739	0.928415	5	12.7145	1.01242	4	5.80615	1.01166	6	5.86728	1.09907	5	3.4805	0.894269	4	10.7137	0.925012	6	4.26555	1.01982	5	2.63796	1.08595	4	4.12331
P35270	Sepiapterin reductase OS=Homo sapiens GN=SPR PE=1 SV=1 - [SPRE_HUMAN]	39.08	9	9	27	261	28.0308	8.04541	0.921328	7	17.5546	0.955451	12	3.168	1.02997	8	11.2853	1.25053	7	9.29665	1.01552	12	6.45733	0.98225	8	1.71101	0.915877	7	10.8714	1.03004	12	4.30692	0.929657	8	12.295	1.04119	7	21.2208	0.999144	12	11.325	1.01254	8	9.48157
Q14192	Four and a half LIM domains protein 2 OS=Homo sapiens GN=FHL2 PE=1 SV=3 - [FHL2_HUMAN]	39.07	10	10	36	279	32.1706	7.54736	1.11005	14	4.44227	0.976618	11	7.12258	1.07482	11	5.68162	0.916606	14	9.03799	1.14045	11	5.70341	0.921327	11	3.71646	1.10115	14	6.27119	0.878567	11	11.2057	1.03558	11	14.3425	0.812897	14	11.4353	0.973381	11	3.7003	0.985254	11	7.02204
P32969	60S ribosomal protein L9 OS=Homo sapiens GN=RPL9 PE=1 SV=1 - [RL9_HUMAN]	39.06	8	8	65	192	21.8498	9.94971	1.08533	24	6.75272	1.06897	20	10.5326	1.0547	21	8.88983	0.892992	24	14.6861	0.870575	20	11.8727	1.04608	21	15.6837	1.09746	24	8.65939	1.13343	20	9.36511	0.926336	21	24.7235	0.862181	24	17.1154	0.898521	20	16.4601	0.943423	21	16.5966
P63000	Ras-related C3 botulinum toxin substrate 1 OS=Homo sapiens GN=RAC1 PE=1 SV=1 - [RAC1_HUMAN]	39.06	7	8	56	192	21.4362	8.49951	1.05899	22	5.60408	0.990444	15	5.29677	0.980556	13	6.29454	0.884654	22	9.55759	1.0416	15	3.29344	1.02356	13	10.4034	1.06505	22	6.24994	0.998943	15	9.19394	0.950705	13	14.6583	0.90077	22	8.32732	0.988721	15	5.50507	1.05626	13	4.68873
Q53LP3	Ankyrin repeat domain-containing protein SOWAHC OS=Homo sapiens GN=SOWAHC PE=1 SV=1 - [SWAHC_HUMAN]	39.05	16	16	36	525	55.6381	7.03467	0.975643	17	5.49244	0.931603	8	10.0747	0.855011	11	4.80997	1.04205	17	9.24296	1.07771	8	6.62973	1.05496	11	2.91231	0.975786	17	4.23714	1.01454	8	13.3254	1.00756	11	7.35004	1.09564	17	5.72925	1.00487	8	6.09517	1.05022	11	5.48414
O43390	Heterogeneous nuclear ribonucleoprotein R OS=Homo sapiens GN=HNRNPR PE=1 SV=1 - [HNRPR_HUMAN]	39.02	17	25	178	633	70.8993	8.1333	1.01155	42	9.71302	1.00097	34	7.88309	0.97547	41	9.93204	0.956182	42	11.5183	1.01155	34	5.63041	1.02118	41	5.74392	1.03039	42	10.1096	0.990114	34	7.56257	0.990621	41	9.75264	1.00755	42	12.549	0.982448	34	8.56719	0.980553	41	11.5069
P50502	Hsc70-interacting protein OS=Homo sapiens GN=ST13 PE=1 SV=2 - [F10A1_HUMAN]	39.02	15	15	78	369	41.3055	5.2749	0.991841	29	7.74105	0.935953	23	3.21111	0.966448	26	8.55446	0.990894	29	4.6235	1.02499	23	10.8729	0.989023	26	9.16723	1.00064	29	9.79267	1.00561	23	5.57622	1.1065	26	9.40651	1.04095	29	9.12572	1.02368	23	6.41894	0.961245	26	9.34776
B2RE46	cDNA, FLJ96923, highly similar to Homo sapiens ribophorin II (RPN2), mRNA OS=Homo sapiens PE=2 SV=1 - [B2RE46_HUMAN]	38.99	16	16	122	631	69.2911	5.78271	0.978149	37	6.3149	1.05218	43	5.87343	1.10417	42	11.7788	1.07484	36	7.25476	0.968712	43	7.7172	1.00895	42	10.6234	0.974428	37	6.55931	0.996455	43	9.27279	0.903432	42	26.8384	1.06423	37	10.4081	0.961885	43	7.55987	1.00533	42	14.432
F8VR84	UPF0160 protein MYG1, mitochondrial OS=Homo sapiens GN=C12orf10 PE=1 SV=1 - [F8VR84_HUMAN]	38.97	7	7	22	213	24.043	5.38916	1.06187	8	6.16644	0.951036	6	5.37932	0.871246	7	5.67069	0.816034	8	9.72585	1.0562	6	3.42966	1.09604	7	3.91325	1.03221	8	5.82794	0.973689	6	9.01263	0.893728	7	13.2005	0.978398	8	12.3138	0.981034	6	4.09354	1.07115	7	4.52821
O60830	Mitochondrial import inner membrane translocase subunit Tim17-B OS=Homo sapiens GN=TIMM17B PE=1 SV=1 - [TI17B_HUMAN]	38.95	4	4	10	172	18.2613	9.02686	0.961829	4	12.4183	1.0356	3	6.15747	0.9613	3	7.70276	1.02462	4	5.64465	0.97539	3	6.45919	0.985226	3	4.1182	0.982287	4	1.05601	1.15722	3	20.8755	0.865076	3	24.8719	0.987284	4	12.8545	0.817685	3	4.14538	1.24335	3	17.1163
P41567	Eukaryotic translation initiation factor 1 OS=Homo sapiens GN=EIF1 PE=1 SV=1 - [EIF1_HUMAN]	38.94	4	4	10	113	12.7246	7.44482	1.21001	1		1.01578	3	10.1103	0.983056	5	4.27892	0.76581	1		0.963912	3	4.72413	1.05541	5	5.92876	1.14358	1		0.949883	3	0.907104	0.924541	5	17.1789	0.723043	1		1.00829	3	8.75435	1.02448	5	4.60389
P63172	Dynein light chain Tctex-type 1 OS=Homo sapiens GN=DYNLT1 PE=1 SV=1 - [DYLT1_HUMAN]	38.94	3	3	5	113	12.444	5.08447	0.928312	3	0.926819	1.11212	2	17.381				0.993328	3	16.0702	0.929234	2	11.48				1.01417	3	3.1533	1.03864	2	3.67611				1.07079	3	5.99785	0.894421	2	16.344
A0A024R7L5	UPF1 regulator of nonsense transcripts homolog (Yeast), isoform CRA_b OS=Homo sapiens GN=UPF1 PE=4 SV=1 - [A0A024R7L5_HUMAN]	38.91	35	36	119	1118	122.958	6.68311	0.983547	48	7.22388	0.951666	36	6.85053	1.00657	34	7.03119	1.01611	48	11.7464	1.0394	36	9.42181	0.984537	34	7.9117	0.998245	48	7.93888	1.00663	36	8.44356	1.00429	34	14.1111	1.00399	48	6.46976	1.02557	36	7.31708	0.98638	34	13.2819
Q13561	Dynactin subunit 2 OS=Homo sapiens GN=DCTN2 PE=1 SV=4 - [DCTN2_HUMAN]	38.9	13	13	47	401	44.2039	5.21143	1.01082	18	6.93034	0.943877	15	7.00231	0.984109	14	7.29639	0.976204	18	10.4405	1.0213	15	8.54943	0.994466	14	5.68999	1.00954	18	5.90402	1.00731	15	3.40228	1.01788	14	9.1807	1.00496	18	8.5789	1.02129	15	4.01521	1.02562	14	6.23519
Q9BRX5	DNA replication complex GINS protein PSF3 OS=Homo sapiens GN=GINS3 PE=1 SV=1 - [PSF3_HUMAN]	38.89	7	7	14	216	24.5192	5.33838	0.991811	7	12.9541	0.931324	1		1.06798	6	12.2977	1.04384	7	7.2246	1.14652	1		0.907222	6	7.44289	0.951695	7	4.36209	0.9901	1		1.01943	6	8.15907	1.03743	7	19.989	0.950033	1		0.991427	6	6.10471
Q567R0	UQCRH protein OS=Homo sapiens GN=UQCRH PE=2 SV=1 - [Q567R0_HUMAN]	38.82	3	3	12	85	9.94683	5.45264	1.05136	1		0.958137	6	7.49069	0.981709	5	9.59026	1.08923	1		0.987169	6	4.65348	0.965427	5	4.02097	0.944792	1		1.07075	6	10.2016	1.13213	5	16.4076	0.939272	1		0.99094	6	5.06674	0.971603	5	23.7503
P52788	Spermine synthase OS=Homo sapiens GN=SMS PE=1 SV=2 - [SPSY_HUMAN]	38.8	12	12	47	366	41.2418	5.021	0.960773	12	3.52849	0.994936	17	7.75894	0.958336	18	11.1688	1.08314	12	4.4336	0.999741	17	6.78716	1.01355	18	6.08959	0.979376	12	6.30191	1.01848	17	7.68622	1.10484	18	22.0199	1.03044	12	5.37746	0.996274	17	6.69965	0.950483	18	12.2675
P50440	Glycine amidinotransferase, mitochondrial OS=Homo sapiens GN=GATM PE=1 SV=1 - [GATM_HUMAN]	38.77	14	14	38	423	48.4243	8.04541	0.963448	16	7.05677	0.995509	13	4.98017	1.04983	9	4.10227	1.00766	16	12.9573	1.00849	13	6.52339	0.960944	9	12.9742	0.991424	16	5.85805	0.990093	13	5.48754	1.04446	9	19.2189	1.05617	16	13.1165	1.00738	13	5.55788	0.900966	9	4.39269
Q9UHB9	Signal recognition particle subunit SRP68 OS=Homo sapiens GN=SRP68 PE=1 SV=2 - [SRP68_HUMAN]	38.76	21	21	62	627	70.6856	8.55811	1.09442	20	5.11317	1.00517	20	6.8857	0.918589	22	17.5366	0.907374	20	14.6996	1.04976	20	5.35761	1.11947	22	6.36975	1.04572	20	7.14911	0.987436	20	8.31706	0.910741	22	11.4435	0.905635	20	10.2643	1.01921	20	8.41123	1.06585	22	10.5462
Q15185	Prostaglandin E synthase 3 OS=Homo sapiens GN=PTGES3 PE=1 SV=1 - [TEBP_HUMAN]	38.75	6	6	74	160	18.6854	4.53857	1.00352	24	6.90194	1.01101	26	9.39492	0.940893	24	7.50161	1.02151	24	8.76009	0.978604	26	8.9693	1.05392	24	8.65845	0.991805	24	9.56286	1.06357	26	7.77569	0.982521	24	11.1268	0.996001	24	11.1939	0.956576	26	8.16824	0.97878	24	7.3296
Q9BQQ5	Ribosomal protein L27a OS=Homo sapiens GN=L27a PE=4 SV=1 - [Q9BQQ5_HUMAN]	38.68	5	5	45	106	12.0074	11.4585	1.05004	16	7.54297	1.08661	14	6.31375	1.01816	15	8.50613	0.865466	16	12.173	0.899461	14	7.68457	0.974651	15	2.71521	1.08477	16	6.26144	1.09975	14	8.00519	1.06002	15	10.0534	0.911364	16	16.1715	0.90649	14	6.2743	0.944689	15	9.89425
Q13200	26S proteasome non-ATPase regulatory subunit 2 OS=Homo sapiens GN=PSMD2 PE=1 SV=3 - [PSMD2_HUMAN]	38.66	30	30	148	908	100.136	5.19873	0.970561	57	11.3874	0.989212	44	12.0576	0.979485	47	17.4076	1.00065	57	17.1134	1.02142	44	13.2995	0.996337	47	10.3261	1.00468	57	9.66218	1.0312	44	10.6014	0.933555	47	32.7773	0.962833	57	19.7308	0.986671	44	14.2677	1.08086	47	21.2114
Q9Y383	Putative RNA-binding protein Luc7-like 2 OS=Homo sapiens GN=LUC7L2 PE=1 SV=2 - [LC7L2_HUMAN]	38.52	15	15	53	392	46.4856	10.0083	1.00082	16	3.29611	1.00647	16	5.94832	0.971257	20	5.50488	1.01986	16	5.08497	1.03618	16	5.51779	1.03597	20	7.83654	1.03124	16	5.81235	0.95674	16	6.51526	0.936598	20	19.8926	0.961796	16	6.15944	0.977988	16	4.19847	1.02619	20	4.6293
P35908	Keratin, type II cytoskeletal 2 epidermal OS=Homo sapiens GN=KRT2 PE=1 SV=2 - [K22E_HUMAN]	38.5	17	24	190	639	65.3932	8.00146	1.11994	9	4.68241	1.04579	11	3.74467	0.894188	13	7.06255	0.974895	9	5.03015	1.01175	11	4.76841	1.10594	13	10.7419	0.892695	9	16.9273	1.06874	11	5.83253	1.10826	13	9.3839	1.02625	9	4.25617	0.924822	11	8.86753	0.837207	13	7.5683
E1NZA1	Peroxisome proliferator activated receptor interacting complex protein OS=Homo sapiens GN=PRIC295 PE=2 SV=1 - [E1NZA1_HUMAN]	38.49	93	94	353	2671	292.558	7.43018	0.966831	127	7.56962	1.00857	116	6.08363	1.02385	107	10.8615	1.05114	127	12.7684	0.963533	116	8.73252	1.0064	107	7.20971	1.00791	127	8.02271	1.04744	116	7.12606	0.967316	107	20.4707	0.98736	127	8.96047	0.977816	115	7.63816	0.971198	107	10.16
B4DUP5	cDNA FLJ60165, highly similar to Translation initiation factor eIF-2B subunit delta OS=Homo sapiens PE=2 SV=1 - [B4DUP5_HUMAN]	38.46	1	8	25	312	34.7754	10.0669	0.841804	1		0.745651	1		0.87168	1		0.922121	1		1.04969	1		0.910592	1		0.971577	1		1.10185	1		1.05945	1		1.35677	1		1.1339	1		1.17897	1
Q9UK41	Vacuolar protein sorting-associated protein 28 homolog OS=Homo sapiens GN=VPS28 PE=1 SV=1 - [VPS28_HUMAN]	38.46	7	7	17	221	25.4086	5.5415	1.09609	5	3.17275	0.98004	6	6.73752	1.03233	6	13.6507	0.978092	5	29.2744	1.01316	6	2.57999	0.979001	6	7.69622	1.00822	5	7.69898	0.995974	6	4.28909	1.05677	6	28.4258	0.942631	5	12.6174	0.988763	6	6.51034	0.947169	6	9.38991
P47897	Glutamine--tRNA ligase OS=Homo sapiens GN=QARS PE=1 SV=1 - [SYQ_HUMAN]	38.45	26	27	108	775	87.7429	7.15186	1.04012	41	7.6937	1.00151	32	8.19258	1.02561	30	8.44903	0.967553	41	11.7919	1.02823	32	6.70523	1.07971	30	8.52303	1.00761	41	10.1921	0.995036	32	7.54678	0.920648	30	18.9107	0.951815	41	10.3432	0.993906	32	7.9748	0.974068	30	11.5605
P53701	Cytochrome c-type heme lyase OS=Homo sapiens GN=HCCS PE=1 SV=1 - [CCHL_HUMAN]	38.43	9	9	24	268	30.5818	6.68311	0.952439	10	8.09044	0.968123	8	7.04488	0.975646	6	15.0833	1.12476	10	14.6209	1.05202	8	10.6759	0.943901	6	18.0179	0.916362	10	5.85755	0.993108	8	6.08523	1.05464	6	5.20388	1.1087	10	10.8094	0.995457	8	4.84425	1.00038	6	3.91501
Q9NR31	GTP-binding protein SAR1a OS=Homo sapiens GN=SAR1A PE=1 SV=1 - [SAR1A_HUMAN]	38.38	3	7	48	198	22.3525	6.68311	0.979221	4	5.83836	1.03929	6	9.98809	1.031	4	7.08371	1.08193	4	15.764	1.06028	6	1.56462	0.978816	4	5.0646	0.904633	4	2.97447	0.986571	6	5.39656	1.03055	4	9.43487	1.05362	4	0.981567	0.945045	6	10.9498	0.965536	4	2.57161
B1AJY5	26S proteasome non-ATPase regulatory subunit 10 OS=Homo sapiens GN=PSMD10 PE=1 SV=1 - [B1AJY5_HUMAN]	38.38	5	5	18	185	20.2042	5.57959	0.949151	8	7.81448	0.95413	5	2.38726	1.0211	5	1.30053	1.10659	8	12.7343	1.04765	5	6.41852	1.06384	5	1.30596	0.90232	8	9.09715	1.00405	5	3.32202	0.824121	5	7.21184	1.04499	8	7.23873	0.981576	5	7.78585	1.08287	5	9.57488
Q14011	Cold-inducible RNA-binding protein OS=Homo sapiens GN=CIRBP PE=1 SV=1 - [CIRBP_HUMAN]	38.37	5	5	18	172	18.6367	9.51025	1.12187	7	8.62731	1.03746	6	7.30503	0.752538	5	17.718	0.734085	7	20.4912	0.999525	6	2.894	1.09305	5	11.5794	1.21714	7	8.37341	0.994341	6	4.70958	0.881517	5	10.3761	0.753503	7	18.9126	0.931981	6	6.78583	1.23844	5	5.28028
P46063	ATP-dependent DNA helicase Q1 OS=Homo sapiens GN=RECQL PE=1 SV=3 - [RECQ1_HUMAN]	38.37	21	22	71	649	73.41	7.88428	1.03241	25	8.31454	0.978509	20	7.32928	1.01045	23	5.69515	0.986055	25	9.88111	1.01158	20	7.1942	1.09842	23	10.0388	1.0078	25	6.2229	1.00958	20	9.06005	0.933783	23	16.7659	0.998314	25	5.60127	0.979579	20	8.10449	0.987047	23	10.7028
B4DV79	Eukaryotic translation initiation factor 3 subunit B OS=Homo sapiens GN=EIF3B PE=2 SV=1 - [B4DV79_HUMAN]	38.35	25	25	110	738	85.0814	5.26221	1.06631	45	8.80922	0.985858	33	11.0295	0.991814	32	10.2241	0.905233	45	12.3416	1.04837	33	8.12569	1.031	32	5.71098	1.04701	45	9.28408	0.975283	33	8.95302	0.99366	32	16.6237	0.928514	45	13.2298	1.00984	33	7.21445	0.99112	32	8.85989
Q14166	Tubulin--tyrosine ligase-like protein 12 OS=Homo sapiens GN=TTLL12 PE=1 SV=2 - [TTL12_HUMAN]	38.35	18	18	66	644	74.356	5.52881	0.972649	28	5.50144	0.984179	20	8.07358	0.958156	18	12.2129	0.990867	28	14.6951	1.02024	20	5.70118	1.03086	18	8.35085	0.975659	28	15.1688	0.985917	20	4.37574	0.907069	18	22.3632	1.03264	28	13.4067	1.01641	20	5.06444	1.09458	18	15.3937
Q9UBB4	Ataxin-10 OS=Homo sapiens GN=ATXN10 PE=1 SV=1 - [ATX10_HUMAN]	38.32	15	15	47	475	53.4548	5.24951	1.08525	22	11.3941	1.03647	13	9.51106	1.00794	12	5.36416	0.818161	22	14.5046	0.951028	13	8.42748	1.01259	12	9.45212	1.10361	22	11.3765	1.07751	13	8.69755	1.06227	12	5.29684	0.876203	22	19.0888	0.965107	13	7.30664	0.996536	12	12.9439
P17096	High mobility group protein HMG-I/HMG-Y OS=Homo sapiens GN=HMGA1 PE=1 SV=3 - [HMGA1_HUMAN]	38.32	2	5	27	107	11.6691	10.3159	1.05818	4	9.03094	0.955766	3	8.38954	0.897284	3	12.301	1.08774	4	2.57907	1.23072	3	13.736	1.18275	3	10.654	1.10391	4	1.55069	1.00876	3	3.80064	0.876758	3	7.18764	0.760864	4	16.309	0.801256	3	3.38094	1.14362	3	22.2852
A0A1B0GTG2	Alpha-aminoadipic semialdehyde dehydrogenase OS=Homo sapiens GN=ALDH7A1 PE=4 SV=1 - [A0A1B0GTG2_HUMAN]	38.25	15	15	52	536	58.103	8.1333	1.03265	17	4.48611	1.02008	19	5.08076	0.963024	16	12.3347	1.00861	17	8.09328	1.02977	19	6.33718	1.04948	16	6.9185	0.997877	17	6.82344	0.991014	19	7.4912	0.933487	16	16.0118	0.964055	17	10.0367	0.966922	19	4.65476	1.04605	16	5.47758
P45973	Chromobox protein homolog 5 OS=Homo sapiens GN=CBX5 PE=1 SV=1 - [CBX5_HUMAN]	38.22	5	6	19	191	22.2111	5.85889	1.00939	7	2.97364	0.935224	5	7.81404	1.05038	6	16.5543	1.04068	7	2.33073	1.1853	5	1.84436	1.02348	6	11.6077	1.00912	7	6.4878	0.894607	5	3.75542	1.11408	6	10.5686	1.01125	7	3.05734	0.979626	5	7.49723	0.896637	6	1.15502
Q9BRA2	Thioredoxin domain-containing protein 17 OS=Homo sapiens GN=TXNDC17 PE=1 SV=1 - [TXD17_HUMAN]	38.21	4	4	20	123	13.9318	5.51611	0.852599	12	17.3227	0.989077	3	8.05262	0.955459	5	14.4796	1.22384	12	23.2639	1.0219	3	2.209	1.00704	5	7.40302	0.920733	12	8.03715	0.999894	3	11.3155	0.982569	5	9.60187	1.14736	12	11.1114	1.06564	3	3.98141	1.04653	5	31.6558
C9JQD4	Peptidyl-prolyl cis-trans isomerase (Fragment) OS=Homo sapiens GN=PPIH PE=1 SV=1 - [C9JQD4_HUMAN]	38.19	5	6	20	144	15.79	8.71924	1.01224	5	6.41527	0.951848	6	6.59798	0.907095	7	7.10287	0.98603	5	9.31482	1.08225	6	3.88734	1.09262	7	6.52857	1.0455	5	5.15758	0.972638	6	1.48542	0.870281	7	18.5059	0.970465	5	9.98107	1.04472	6	2.8017	1.04982	7	9.44169
A0A024R1T5	2',3'-cyclic-nucleotide 3'-phosphodiesterase OS=Homo sapiens GN=CNP PE=3 SV=1 - [A0A024R1T5_HUMAN]	38.15	16	16	48	401	45.0703	8.52881	0.936242	13	5.02311	0.963663	16	2.90648	1.08298	19	4.5287	1.13574	13	6.63211	1.06021	16	6.24112	0.961139	19	7.24294	0.949508	13	4.4089	0.971353	16	5.41527	1.09142	19	9.91672	1.0707	13	9.55976	1.00995	16	6.57325	0.925815	19	8.10664
P62753	40S ribosomal protein S6 OS=Homo sapiens GN=RPS6 PE=1 SV=1 - [RS6_HUMAN]	38.15	13	13	83	249	28.663	10.8433	1.07845	31	8.85608	1.10434	27	5.60434	0.993613	25	8.30236	0.782282	31	14.0965	0.867929	27	6.27516	0.982206	25	8.20549	1.15989	31	8.81922	1.10223	27	10.2899	1.06221	25	8.89063	0.819969	31	14.1634	0.914981	27	6.16941	0.971273	25	13.5542
Q12771	P37 AUF1 OS=Homo sapiens PE=2 SV=1 - [Q12771_HUMAN]	38.11	1	14	165	286	31.4617	7.35693	1.03713	1		0.886329	1					0.870679	1		1.10994	1					1.04896	1		0.946655	1					1.01152	1		1.07509	1
B4DMT5	Eukaryotic translation initiation factor 3 subunit F OS=Homo sapiens GN=EIF3F PE=2 SV=1 - [B4DMT5_HUMAN]	38.11	11	11	49	307	33.219	5.59229	1.04299	23	5.06512	0.959854	13	10.5214	0.911526	13	7.71646	0.971509	23	14.6896	1.03591	13	6.70005	1.09698	13	9.78285	1.01094	23	7.12133	1.02515	13	7.62232	0.832121	13	33.7707	0.955542	23	10.7796	1.02822	13	10.7855	1.07305	13	12.2753
Q5XPV6	Small nuclear ribonucleoprotein-associated protein OS=Homo sapiens PE=2 SV=1 - [Q5XPV6_HUMAN]	38.1	7	9	58	231	23.6412	10.6968	1.00035	20	10.9503	1.02284	18	8.88574	0.974588	18	13.7881	1.02077	20	17.2447	1.01742	18	12.7577	1.01265	18	8.77904	1.0302	20	10.5577	1.01946	18	11.9707	0.902338	18	32.6841	1.00104	20	13.2416	0.938015	18	13.2535	1.09108	18	24.1287
B4DY32	cDNA FLJ51387, highly similar to Asparagine synthetase (glutamine-hydrolyzing) (EC 6.3.5.4) OS=Homo sapiens PE=2 SV=1 - [B4DY32_HUMAN]	38.08	1	16	73	478	54.827	6.40479	1.05248	4	7.90001	1.01703	2	2.70201	0.688198	4	14.5662	0.744191	4	9.1875	0.972036	2	0.80401	1.31108	4	9.22036	1.01023	4	19.1686	1.06093	2	5.96744	0.707024	4	6.85927	1.09975	4	43.2443	0.950818	2	4.07612	1.16036	4	12.3995
J3QL34	L-xylulose reductase (Fragment) OS=Homo sapiens GN=DCXR PE=1 SV=1 - [J3QL34_HUMAN]	38.07	5	5	12	176	18.9079	8.95361	0.992895	4	2.69659	0.930916	3	6.48202	0.962684	5	17.0217	0.87051	4	6.54901	1.09189	3	4.07112	1.0423	5	16.5482	1.02541	4	6.2129	0.996712	3	7.6125	0.851575	5	3.1418	1.08287	4	13.0145	0.995287	3	3.8237	1.14131	5	17.2167
G3V5Q1	DNA-(apurinic or apyrimidinic site) lyase (Fragment) OS=Homo sapiens GN=APEX1 PE=1 SV=1 - [G3V5Q1_HUMAN]	38.02	8	8	31	242	27.1079	8.76318	1.02571	15	6.42424	1.00158	8	5.91768	0.917622	8	5.9067	0.982918	15	7.35385	1.01211	8	11.0586	1.00165	8	10.4549	1.033	15	6.87501	1.00561	8	8.6295	1.0123	8	3.20373	0.92306	15	10.4754	0.983917	8	6.62164	0.998376	8	5.96577
A0A024RC87	Ribonuclease/angiogenin inhibitor 1, isoform CRA_a OS=Homo sapiens GN=RNH1 PE=4 SV=1 - [A0A024RC87_HUMAN]	37.94	12	12	48	456	49.3848	4.84326	1.01179	19	7.1076	0.989728	13	6.29585	0.955216	16	9.08749	1.0278	19	8.88319	1.05277	13	6.10211	1.01561	16	9.29906	0.999257	19	5.88647	0.980301	13	6.89953	0.978679	16	8.79481	0.958948	19	3.5552	0.973817	13	6.12437	1.03928	16	12.2947
Q9H4A4	Aminopeptidase B OS=Homo sapiens GN=RNPEP PE=1 SV=2 - [AMPB_HUMAN]	37.85	22	22	75	650	72.5495	5.74463	0.978411	23	10.5773	0.991087	29	8.41692	0.999725	23	9.90912	1.03048	22	5.9432	1.00084	28	7.69814	1.007	23	4.9975	0.987262	23	6.95647	1.01965	29	6.80263	0.951232	23	15.6184	1.0295	23	11.6138	1.00456	29	14.3114	1.02305	23	11.24
C9JVH3	Pituitary adenylate cyclase-activating polypeptide type I receptor (Fragment) OS=Homo sapiens GN=ADCYAP1R1 PE=4 SV=1 - [C9JVH3_HUMAN]	37.84	1	1	1	74	8.07989	6.23975	1.31369	1																	2.0422	1
P61586	Transforming protein RhoA OS=Homo sapiens GN=RHOA PE=1 SV=1 - [RHOA_HUMAN]	37.82	2	7	54	193	21.7541	6.1001	1.08739	2	9.56647	0.901111	7	11.5911	0.89696	7	14.825	0.90335	2	10.5042	1.0401	7	3.05137	1.08318	7	3.93417	0.98233	2	9.59677	0.9671	7	5.46742	0.974301	7	5.3666	0.986083	2	20.1317	1.01356	7	5.97743	0.990195	7	3.86776
B4DZC0	cDNA FLJ51771, highly similar to SWI/SNF-related matrix-associatedactin-dependent regulator of chromatin subfamily A member5 (EC 3.6.1.-) OS=Homo sapiens PE=2 SV=1 - [B4DZC0_HUMAN]	37.79	24	38	100	995	116.683	8.33838	1.02151	18	9.66435	1.06078	19	4.74198	1.00474	16	10.6108	0.964411	18	6.29991	1.01854	19	6.44709	1.02186	16	9.57187	1.05375	18	7.01209	0.958868	19	5.97943	1.03432	16	23.5921	0.954297	18	9.7736	0.978486	19	4.8658	0.935279	16	8.62173
P21283	V-type proton ATPase subunit C 1 OS=Homo sapiens GN=ATP6V1C1 PE=1 SV=4 - [VATC1_HUMAN]	37.7	15	15	30	382	43.914	7.45947	1.00104	9	10.3059	0.94896	9	7.60841	0.934956	11	7.83341	0.977422	9	8.50121	0.995158	9	5.61155	1.01815	11	6.44601	0.987733	9	6.26689	0.99002	9	3.68248	1.04564	11	6.32726	1.01092	9	5.87197	1.07914	9	3.16833	0.96192	11	6.10578
P67870	Casein kinase II subunit beta OS=Homo sapiens GN=CSNK2B PE=1 SV=1 - [CSK2B_HUMAN]	37.67	6	6	25	215	24.926	5.5542	1.01549	10	4.02193	0.987273	8	7.66177	0.929393	7	11.2429	1.03669	10	18.6818	1.0146	8	8.57653	1.00434	7	5.46794	0.970343	10	11.7233	0.982089	8	7.0172	0.974316	7	20.757	0.998866	10	8.95625	1.0151	8	11.1354	1.0663	7	16.7795
O75396	Vesicle-trafficking protein SEC22b OS=Homo sapiens GN=SEC22B PE=1 SV=4 - [SC22B_HUMAN]	37.67	8	8	42	215	24.5775	6.91748	1.03305	10	6.69732	1.00814	13	7.15504	0.969692	19	8.25104	1.00613	10	7.53461	1.03074	13	6.76144	1.02094	19	13.9846	1.0005	10	7.53908	0.991796	13	3.67451	0.997007	19	15.5563	0.950421	10	10.4399	0.980654	13	8.23919	1.00955	19	5.65989
P31040	Succinate dehydrogenase [ubiquinone] flavoprotein subunit, mitochondrial OS=Homo sapiens GN=SDHA PE=1 SV=2 - [SDHA_HUMAN]	37.65	19	19	65	664	72.6453	7.38623	1.02558	23	6.26088	1.01614	21	6.47163	1.00107	21	9.41257	0.93851	23	11.3009	0.982376	21	7.5456	0.964277	21	9.56457	1.05901	23	7.17137	1.00648	21	6.12388	0.998946	21	16.2303	0.975095	23	11.7876	0.971069	21	9.10829	0.99952	21	14.972
Q16466	Non-histone chromosomal protein (Fragment) OS=Homo sapiens PE=2 SV=1 - [Q16466_HUMAN]	37.61	1	5	11	109	12.5633	9.75928	1.03337	1								0.937116	1								1.13702	1								0.832087	1
Q01105	Protein SET OS=Homo sapiens GN=SET PE=1 SV=3 - [SET_HUMAN]	37.59	2	9	58	290	33.4687	4.32275	0.976182	2	4.31785	1.01551	3	2.29817	0.949477	2	2.57823	1.07611	2	20.0259	1.01039	3	6.66948	1.00281	2	7.36422	0.893937	2	4.3601	0.994654	3	9.56442	0.996363	2	17.6121	1.1207	2	7.02896	1.00155	3	5.54476	1.03742	2	10.9475
Q9Y244	Proteasome maturation protein OS=Homo sapiens GN=POMP PE=1 SV=1 - [POMP_HUMAN]	37.59	4	4	9	141	15.7791	5.10986	1.0287	4	2.48708	0.947635	3	0.849582	0.900089	2	9.15719	0.869643	4	12.7311	0.907218	3	3.38216	0.867881	2	3.70911	1.06434	4	9.96536	1.05132	3	5.87776	1.26454	2	1.27433	0.976329	4	3.47606	1.13693	3	2.16536	0.984049	2	5.25721
P60468	Protein transport protein Sec61 subunit beta OS=Homo sapiens GN=SEC61B PE=1 SV=2 - [SC61B_HUMAN]	37.5	3	3	13	96	9.9681	11.561	1.06257	5	5.3043	0.976337	5	5.28605	0.982816	3	17.5574	0.92618	5	11.118	0.998093	5	4.57458	1.02888	3	17.9638	0.916866	5	7.78583	0.968422	5	7.08677	1.00822	3	0.208499	1.04357	5	3.7131	1.03106	5	3.42239	0.909057	3	9.64
O00148	ATP-dependent RNA helicase DDX39A OS=Homo sapiens GN=DDX39A PE=1 SV=2 - [DX39A_HUMAN]	37.47	7	19	127	427	49.098	5.68115	1.06403	8	6.62475	0.993886	9	2.17397	0.966781	8	7.45777	0.975989	8	4.78941	1.00864	9	5.31885	1.00953	8	5.89372	0.956396	8	3.79989	0.998996	9	2.5292	1.01426	8	9.2746	0.934735	8	16.9341	1.00597	9	2.26099	0.962302	8	6.55413
O00264	Membrane-associated progesterone receptor component 1 OS=Homo sapiens GN=PGRMC1 PE=1 SV=3 - [PGRC1_HUMAN]	37.44	5	6	32	195	21.6578	4.70361	0.987016	9	4.95549	1.0006	9	8.16484	1.08438	6	12.3876	1.01016	9	15.7446	0.98531	9	8.17255	0.955333	6	20.3883	1.00036	9	5.91735	0.957331	9	8.95246	0.870512	6	12.2531	1.04442	9	8.11325	1.027	9	6.4253	1.05713	6	9.5224
Q5QNZ2	ATP synthase F(0) complex subunit B1, mitochondrial OS=Homo sapiens GN=ATP5F1 PE=1 SV=1 - [Q5QNZ2_HUMAN]	37.44	7	7	29	195	22.2608	9.26123	0.994199	11	5.81457	0.979897	9	2.70059	0.993345	9	7.53609	1.01327	11	12.0714	1.01371	9	11.6296	1.02784	9	7.42893	1.00042	11	7.81546	0.973876	9	3.81869	1.05604	9	13.0565	1.00713	11	3.93523	1.02511	9	4.50011	0.961543	9	12.4218
A8K8U1	cDNA FLJ77762, highly similar to Homo sapiens cullin-associated and neddylation-dissociated 1 (CAND1), mRNA OS=Homo sapiens PE=2 SV=1 - [A8K8U1_HUMAN]	37.4	40	40	273	1230	136.231	5.8335	0.981688	100	7.43518	0.968593	85	7.39285	0.936309	88	12.2885	1.01732	100	11.0316	1.02964	85	6.16399	1.03763	88	7.5642	1.00465	100	8.47275	0.999979	85	7.13533	0.925935	88	15.8476	1.02101	100	8.94466	1.01038	85	6.0575	1.03525	88	8.19415
Q5HYD9	Putative uncharacterized protein DKFZp686M0619 (Fragment) OS=Homo sapiens GN=DKFZp686M0619 PE=2 SV=1 - [Q5HYD9_HUMAN]	37.38	3	3	17	107	11.8658	4.79248	0.901193	6	7.72625	0.89358	6	11.8847	0.961232	5	17.5983	1.11728	6	3.8357	1.10727	6	7.61467	0.860152	5	23.1028	0.888586	6	12.4922	0.939312	6	8.08858	0.945295	5	36.0738	1.22014	6	11.1815	1.06124	6	3.53682	1.03143	5	29.08
B2R8R5	cDNA, FLJ94025, highly similar to Homo sapiens tripartite motif-containing 28 (TRIM28), mRNA OS=Homo sapiens PE=2 SV=1 - [B2R8R5_HUMAN]	37.37	27	27	164	835	88.5034	5.77002	0.994673	58	9.65307	0.96881	52	6.89249	0.91658	54	11.1959	1.02949	58	10.3519	1.04154	52	6.5118	1.04563	54	7.89359	1.00227	58	8.16805	0.980529	52	8.01674	0.94458	54	17.5787	0.988409	58	11.5507	1.00116	52	8.21726	1.03119	54	10.9824
Q16698	2,4-dienoyl-CoA reductase, mitochondrial OS=Homo sapiens GN=DECR1 PE=1 SV=1 - [DECR_HUMAN]	37.31	10	10	40	335	36.0448	9.27588	0.970621	11	9.67669	0.974478	14	4.96646	0.93347	15	6.60119	1.02698	11	7.30359	1.03976	14	4.84454	1.05801	15	5.32452	0.989478	11	5.42418	0.968404	14	7.24932	0.975585	15	10.5637	1.04963	11	11.7555	1.01191	14	6.51455	1.02241	15	5.62384
P53618	Coatomer subunit beta OS=Homo sapiens GN=COPB1 PE=1 SV=3 - [COPB_HUMAN]	37.25	34	34	108	953	107.074	6.04932	1.00816	47	8.05665	0.960514	34	6.49637	0.982921	27	11.0964	1.00177	47	12.4443	0.978584	34	5.55269	1.01246	27	7.84718	1.00892	47	7.66721	1.03829	34	7.82384	1.0213	27	9.94112	1.00108	47	10.5319	0.993512	34	6.81986	0.980465	27	10.706
O00422	Histone deacetylase complex subunit SAP18 OS=Homo sapiens GN=SAP18 PE=1 SV=1 - [SAP18_HUMAN]	37.25	5	5	14	153	17.55	9.34912	1.05611	3	3.81256	1.04413	6	4.48963	0.897107	5	13.0726	1.0228	3	12.7922	1.05082	6	4.02295	1.11467	5	8.09888	1.042	3	11.6572	0.997613	6	7.61857	0.890869	5	1.09638	0.855484	3	7.29726	0.950755	6	4.03589	1.04244	5	11.5329
F8W1R7	Myosin light polypeptide 6 OS=Homo sapiens GN=MYL6 PE=1 SV=1 - [F8W1R7_HUMAN]	37.24	6	6	36	145	16.2798	4.65283	1.07603	13	7.64329	0.972479	13	7.70301	0.980787	10	2.5243	1.01986	13	8.76991	1.04376	13	3.30982	1.01474	10	3.59245	0.922418	13	4.6877	0.963385	13	4.4934	1.05779	10	9.38493	1.01518	13	7.44552	1.00711	13	5.59171	0.973055	10	5.12727
P17812	CTP synthase 1 OS=Homo sapiens GN=CTPS1 PE=1 SV=2 - [PYRG1_HUMAN]	37.23	16	20	49	591	66.648	6.45557	1.03114	13	5.90966	1.01438	9	7.72006	0.913021	12	15.7425	0.941371	13	12.331	1.05351	9	10.5137	1.09302	12	8.81487	1.04273	13	9.21321	0.994661	9	6.28088	0.905239	12	10.069	0.949675	13	8.85039	0.970275	9	4.77964	1.05417	12	4.18235
O43776	Asparagine--tRNA ligase, cytoplasmic OS=Homo sapiens GN=NARS PE=1 SV=1 - [SYNC_HUMAN]	37.23	17	17	95	548	62.9025	6.25244	0.947139	34	10.5291	1.00182	31	6.32632	0.941184	30	10.0785	1.08038	34	12.3792	1.00292	31	6.59521	1.03322	30	7.76639	0.998824	34	7.53862	1.01608	31	5.37473	0.929745	30	17.4532	1.02542	34	8.48957	0.979586	31	5.90952	1.07999	30	14.8339
Q4ZG57	DNA helicase (Fragment) OS=Homo sapiens GN=MCM6 PE=3 SV=1 - [Q4ZG57_HUMAN]	37.2	25	25	86	785	88.8903	5.60498	1.03212	36	8.3622	0.991036	24	4.74873	1.03451	25	13.1966	0.929063	36	11.9382	1.03912	24	5.70632	0.939946	25	6.78176	1.06709	36	7.67612	0.990724	24	7.80678	1.09191	25	20.2987	0.897945	36	13.1217	0.976432	24	8.0291	0.951761	25	10.2211
B4DL14	ATP synthase subunit gamma OS=Homo sapiens PE=2 SV=1 - [B4DL14_HUMAN]	37.2	9	9	63	250	27.4953	7.41553	1.01447	22	7.38704	1.00436	17	8.84748	0.994284	24	8.07661	0.945592	22	8.95683	1.02032	17	8.47182	0.998792	24	6.79021	0.998716	22	6.53035	0.951877	17	4.54671	1.11152	24	19.4116	1.03629	22	5.75879	1.00311	17	4.58391	0.869411	24	10.2757
F8WAS3	NADH dehydrogenase [ubiquinone] 1 alpha subcomplex subunit 5 OS=Homo sapiens GN=NDUFA5 PE=1 SV=1 - [F8WAS3_HUMAN]	37.14	2	2	25	70	7.83733	9.43701	1.01838	12	7.91078	1.03162	5	7.38602	0.912169	8	4.89057	1.03077	12	15.1389	0.992955	5	3.69835	1.05537	8	5.3098	0.971619	12	9.40525	0.971662	5	2.20426	0.952599	8	19.0363	1.05164	12	14.9505	0.993494	5	9.81475	1.03545	8	8.61343
Q9P032	NADH dehydrogenase [ubiquinone] 1 alpha subcomplex assembly factor 4 OS=Homo sapiens GN=NDUFAF4 PE=1 SV=1 - [NDUF4_HUMAN]	37.14	7	7	11	175	20.2538	8.82178	0.927742	3	5.29418	1.01555	2	0.979425	1.03921	3	13.3759	1.00793	3	12.166	0.979724	2	0.272277	1.02912	3	6.64243	1.10451	3	1.30833	0.92669	2	0.233808	1.10016	3	24.3648	0.898308	3	18.738	1.07636	2	1.42827	0.989636	3	1.81999
M0R1M1	Fukutin-related protein (Fragment) OS=Homo sapiens GN=FKRP PE=1 SV=1 - [M0R1M1_HUMAN]	37.14	1	1	2	35	3.67598	10.0083	1.00631	1					1.0505	1		1.11067	1					0.817065	1		0.89468	1					0.929472	1		1.05577	1					1.27806	1
A0A0B5EEB2	VKORC1 (Fragment) OS=Homo sapiens GN=VKORC1 PE=4 SV=1 - [A0A0B5EEB2_HUMAN]	37.14	1	1	4	35	3.85696	9.18799	1.03432	1		1.0738	1		0.951162	2	4.66511	0.887153	1		1.01435	1		1.03887	2	0.137214	1.07583	1		0.951928	1		1.02437	2	6.31903	0.962647	1		0.95646	1		0.967098	2	3.15043
P48637	Glutathione synthetase OS=Homo sapiens GN=GSS PE=1 SV=1 - [GSHB_HUMAN]	37.13	15	15	41	474	52.3523	5.92236	1.00488	16	8.12418	0.959677	14	4.35687	0.963637	11	6.42937	0.956056	16	18.0041	1.00527	14	6.22294	1.07276	11	5.483	1.00318	16	5.6951	1.0123	14	9.0095	0.92337	11	11.0563	1.03368	16	8.66252	1.00119	14	5.11205	1.0144	11	8.57144
D6RCD0	Estradiol 17-beta-dehydrogenase 11 OS=Homo sapiens GN=HSD17B11 PE=1 SV=2 - [D6RCD0_HUMAN]	37.11	8	8	20	256	28.0843	9.53955	0.957911	6	10.1761	1.02113	7	5.62457	1.10188	7	4.09962	1.06224	6	3.85273	0.996261	7	8.16866	0.918443	7	4.53765	0.917527	6	3.09614	1.00983	7	6.83581	1.12735	7	10.2014	1.04299	6	2.06402	1.02743	7	5.15145	0.877198	7	8.13503
P16402	Histone H1.3 OS=Homo sapiens GN=HIST1H1D PE=1 SV=2 - [H13_HUMAN]	37.1	4	12	141	221	22.3363	11.019	1.10677	3	7.03696	1.14332	1		1.05887	2	3.24467	0.938827	3	1.45932	0.888388	1		0.954208	2	6.43873	1.11118	3	10.2762	1.07099	1		1.07957	2	3.95348	0.876298	3	13.1344	0.884044	1		0.918437	2	7.51526
P61011	Signal recognition particle 54 kDa protein OS=Homo sapiens GN=SRP54 PE=1 SV=1 - [SRP54_HUMAN]	37.1	16	16	44	504	55.6683	8.74854	0.981801	10	11.5376	0.996157	17	5.14464	0.990689	17	11.3561	1.00261	10	9.56496	1.02435	17	8.85063	0.997385	17	7.91635	1.02048	10	5.9885	1.01236	17	5.93803	0.932023	17	11.2044	1.02966	10	14.9606	0.976493	17	7.01762	1.02943	17	6.75172
P61221	ATP-binding cassette sub-family E member 1 OS=Homo sapiens GN=ABCE1 PE=1 SV=1 - [ABCE1_HUMAN]	37.06	15	21	94	599	67.271	8.33838	1.04201	22	6.23401	0.981894	21	5.99776	0.876404	26	13.7688	0.864493	22	16.9824	1.0098	21	9.19587	1.11765	26	8.34526	1.04432	22	10.9211	0.985017	21	3.97983	0.914224	26	11.6511	0.959337	22	18.9802	1.00872	21	5.14631	1.03576	26	14.2723
M0R2P1	Mediator of RNA polymerase II transcription subunit 26 (Fragment) OS=Homo sapiens GN=MED26 PE=4 SV=1 - [M0R2P1_HUMAN]	37.04	1	2	2	54	6.29258	9.81787				1.28454	1								0.396027	1								1.20326	1								1.06459	1
B4E1L0	Adenylosuccinate synthetase isozyme 2 OS=Homo sapiens GN=ADSS PE=2 SV=1 - [B4E1L0_HUMAN]	37.01	12	12	57	435	47.9086	5.90967	1.00108	17	6.88371	1.01683	24	3.1898	0.96419	16	6.23989	1.02533	17	9.70774	0.997475	24	9.25249	1.07139	16	6.50137	1.00229	17	8.36975	1.03356	24	7.31824	0.893297	16	13.507	0.935093	17	12.9378	0.964631	24	6.91228	1.06547	16	14.3924
Q5U0B3	Proteasome (Prosome, macropain) 26S subunit, non-ATPase, 8 OS=Homo sapiens PE=2 SV=1 - [Q5U0B3_HUMAN]	36.96	10	10	34	257	29.9026	7.28369	1.02737	13	7.40584	0.974432	12	5.71871	0.945718	8	7.71059	1.00099	13	13.9879	1.0103	12	6.80351	1.08487	8	6.55046	1.02352	13	5.42104	1.03077	12	6.74095	0.928816	8	10.5303	0.953105	13	5.48676	1.02517	12	5.21427	1.05627	8	12.3346
Q9BY43	Charged multivesicular body protein 4a OS=Homo sapiens GN=CHMP4A PE=1 SV=3 - [CHM4A_HUMAN]	36.94	2	7	22	222	25.0828	4.70361	1.01819	2	19.4281	1.0835	1		1.01314	1		0.915412	2	0.586461	0.852212	1		1.00774	1		1.01893	2	10.9037	1.06294	1		1.03822	1		1.02099	2	12.0668	0.990554	1		0.937287	1
B2R8A2	cDNA, FLJ93804, highly similar to Homo sapiens gp25L2 protein (HSGP25L2G), mRNA OS=Homo sapiens PE=2 SV=1 - [B2R8A2_HUMAN]	36.92	5	7	29	214	25.0619	7.18115	0.962013	8	12.612	1.04589	7	9.2912	1.16229	8	8.36792	1.03196	8	15.5487	0.963685	7	17.6578	0.965296	8	16.7601	1.02025	8	9.17588	1.03977	7	21.5089	0.935383	8	18.2747	1.09366	8	10.4874	1.02213	7	7.51148	0.942532	8	20.4751
P31937	3-hydroxyisobutyrate dehydrogenase, mitochondrial OS=Homo sapiens GN=HIBADH PE=1 SV=2 - [3HIDH_HUMAN]	36.9	9	9	40	336	35.3058	8.1333	0.96426	14	7.84437	1.02579	12	5.74902	0.991174	14	6.71706	1.04782	14	6.30788	0.953777	12	9.44243	1.03618	14	7.45552	0.961254	14	9.31826	1.10325	12	7.86331	0.855807	14	30.918	1.02427	14	10.6739	0.982362	12	7.98154	1.0587	14	13.9634
L0R6Q1	Alternative protein SLC35A4 OS=Homo sapiens GN=SLC35A4 PE=1 SV=1 - [L0R6Q1_HUMAN]	36.89	3	3	6	103	11.1259	8.104	1.01837	2	6.85035	1.02071	3	0.916953	1.13188	1		1.03323	2	2.86016	1.0624	3	6.99103	1.10671	1		0.988777	2	1.07823	0.93305	3	0.161961	0.690394	1		0.972178	2	9.17456	0.948635	3	1.48565	1.07	1
P09104	Gamma-enolase OS=Homo sapiens GN=ENO2 PE=1 SV=3 - [ENOG_HUMAN]	36.87	8	11	119	434	47.239	5.03369	0.966925	6	2.0446	0.94729	7	6.62766	1.02871	6	1.70505	1.01052	6	3.44066	1.01055	7	6.63259	0.923769	6	15.6327	0.974855	6	2.20497	1.05555	7	8.43756	1.07172	6	30.8065	1.10186	6	7.91726	1.00678	7	6.19172	0.976068	6	21.6863
A0A024R8K7	Integrin beta OS=Homo sapiens GN=ITGB4 PE=3 SV=1 - [A0A024R8K7_HUMAN]	36.87	56	56	205	1752	194.889	6.1001	1.05446	76	8.1977	1.11693	67	7.42375	1.10092	62	11.2628	0.855206	76	16.5152	0.867383	67	7.62563	0.869239	62	12.545	1.11237	76	8.79511	1.0622	67	7.81388	1.08845	62	18.7792	0.89907	76	15.0925	0.954528	67	5.86591	0.949287	62	11.0105
B2RBR9	cDNA, FLJ95650, highly similar to Homo sapiens karyopherin (importin) beta 1 (KPNB1), mRNA OS=Homo sapiens PE=2 SV=1 - [B2RBR9_HUMAN]	36.87	27	27	209	876	97.122	4.77979	1.04565	79	10.3546	1.00013	65	8.94385	0.914062	65	14.0452	1.00068	79	16.0926	0.978352	65	9.40921	1.0714	65	9.51788	1.02779	79	7.90028	1.01752	65	7.95907	0.863868	64	26.8282	0.933123	79	11.8733	0.979337	65	13.8401	1.09241	65	13.7261
P19784	Casein kinase II subunit alpha' OS=Homo sapiens GN=CSNK2A2 PE=1 SV=1 - [CSK22_HUMAN]	36.86	10	11	40	350	41.1871	8.55811	0.960203	10	6.55647	1.0046	12	6.30846	1.0079	11	7.19424	1.08521	10	9.16595	1.03285	12	10.0393	1.12193	11	5.1444	0.969584	10	6.51903	0.925915	12	13.8346	0.860471	11	20.7208	0.97556	10	9.99226	0.936583	12	8.04799	1.0375	11	16.6011
P06753	Tropomyosin alpha-3 chain OS=Homo sapiens GN=TPM3 PE=1 SV=2 - [TPM3_HUMAN]	36.84	0	15	75	285	32.9298	4.71631
Q9Y5L4	Mitochondrial import inner membrane translocase subunit Tim13 OS=Homo sapiens GN=TIMM13 PE=1 SV=1 - [TIM13_HUMAN]	36.84	3	3	11	95	10.493	8.17725	1.1305	4	2.52413	1.05146	4	11.0784	0.962004	3	1.61834	0.912862	4	3.81875	1.05726	4	3.98886	1.05146	3	4.24273	1.07031	4	2.37782	0.949436	4	0.49327	0.817935	3	16.8123	0.792594	4	5.21917	0.949053	4	6.41885	1.12495	3	1.60755
A8K718	cDNA FLJ77502 OS=Homo sapiens PE=2 SV=1 - [A8K718_HUMAN]	36.83	8	8	25	315	35.0936	6.82959	0.944108	9	7.79885	1.05817	7	3.21623	0.96372	9	5.35247	1.20342	9	12.6046	0.936146	7	9.41938	1.13767	9	4.77228	0.956925	9	8.48183	1.08329	7	6.01292	0.723231	9	43.3795	1.05233	9	12.4858	0.968344	7	9.77622	1.12256	9	14.1787
B2R6Y1	Histone H3 OS=Homo sapiens PE=2 SV=1 - [B2R6Y1_HUMAN]	36.76	3	6	94	136	15.3045	11.2681	1.10971	10	21.7741	0.991001	13	7.09075	1.1587	31	10.4419	0.937887	10	19.2409	0.998073	13	5.81466	0.809214	31	10.1551	1.00203	10	12.4309	0.949435	13	7.89058	0.974269	31	10.2602	0.927055	10	24.2862	1.04652	13	8.19308	1.13309	31	7.43417
Q9NUQ6	SPATS2-like protein OS=Homo sapiens GN=SPATS2L PE=1 SV=2 - [SPS2L_HUMAN]	36.74	16	16	61	558	61.6907	9.64209	0.998119	22	7.51312	1.04643	20	6.04505	1.08904	19	8.58005	0.978496	22	15.0773	0.982614	20	10.4719	0.905186	19	5.74332	1.02792	22	11.965	1.00084	20	7.02008	0.99382	19	19.094	0.950817	22	6.39413	1.00566	20	7.07649	0.930727	19	11.7369
O43143	Pre-mRNA-splicing factor ATP-dependent RNA helicase DHX15 OS=Homo sapiens GN=DHX15 PE=1 SV=2 - [DHX15_HUMAN]	36.73	27	28	155	795	90.8752	7.45947	1.02756	63	10.1626	0.989891	45	7.84654	0.968381	46	7.8117	0.983631	63	13.6535	1.00679	45	5.75671	1.0376	46	11.4543	0.958109	63	12.2152	0.974891	45	8.42077	0.925288	46	17.2345	1.008	63	14.9911	0.995658	45	7.33057	1.03701	46	9.93827
P50583	Bis(5'-nucleosyl)-tetraphosphatase [asymmetrical] OS=Homo sapiens GN=NUDT2 PE=1 SV=3 - [AP4A_HUMAN]	36.73	5	5	14	147	16.8186	5.35107	1.03079	6	3.96037	1.0181	5	3.30912	0.98657	3	2.91546	0.972085	6	7.04903	0.952071	5	2.7799	0.994475	3	6.60167	1.05821	6	2.46407	1.01468	5	5.71254	0.98972	3	1.13152	0.949341	6	4.52587	1.01117	5	6.02647	1.04294	3	6.75994
Q7Z7K6	Centromere protein V OS=Homo sapiens GN=CENPV PE=1 SV=1 - [CENPV_HUMAN]	36.73	7	7	22	275	29.9271	9.72998	1.0993	7	5.19175	0.995339	6	2.55816	0.89272	9	7.69243	0.86958	7	10.756	1.03348	6	9.42207	1.18695	9	4.1455	1.06009	7	2.40976	0.942594	6	6.35315	0.927014	9	15.8223	0.843466	7	13.6615	0.951389	6	2.77019	1.09145	9	5.45994
P43243	Matrin-3 OS=Homo sapiens GN=MATR3 PE=1 SV=2 - [MATR3_HUMAN]	36.72	32	32	134	847	94.5648	6.25244	1.03856	46	7.17229	0.994283	42	6.9565	0.979682	44	11.3893	0.961817	46	11.2369	1.01296	42	5.78835	1.01483	44	10.6126	1.02188	46	7.48128	0.998781	42	8.32712	0.916693	44	25.8658	0.933966	46	11.8639	0.975528	42	9.4124	1.04208	44	10.6578
E9PS47	Phosphatidylserine synthase 2 OS=Homo sapiens GN=PTDSS2 PE=1 SV=1 - [E9PS47_HUMAN]	36.67	1	1	1	60	6.31296	4.84326				1.08692	1								0.843693	1								1.08522	1								0.973285	1
H0YD09	Mitochondrial inner membrane protease subunit 1 (Fragment) OS=Homo sapiens GN=IMMP1L PE=1 SV=1 - [H0YD09_HUMAN]	36.67	1	1	2	30	3.47771	8.98291				1.00943	1		1.04874	1					0.968197	1		1.15224	1					1.05973	1		0.784609	1					0.965209	1		0.984392	1
P26447	Protein S100-A4 OS=Homo sapiens GN=S100A4 PE=1 SV=1 - [S10A4_HUMAN]	36.63	5	5	139	101	11.7207	6.11279	0.849065	34	9.09017	0.989209	55	7.21426	1.10027	50	5.19901	1.23099	34	10.9877	1.00883	55	7.91077	0.894131	50	9.97792	0.870823	34	13.7543	0.99789	55	7.98917	1.13152	50	17.7912	1.21089	34	10.0996	1.02033	55	4.7179	0.85864	50	12.3541
H0Y9B6	Beta-hexosaminidase subunit beta (Fragment) OS=Homo sapiens GN=HEXB PE=1 SV=1 - [H0Y9B6_HUMAN]	36.63	1	6	25	202	23.2345	5.18604							1.10879	1								0.846363	1								0.59701	1								1.54527	1
A0A0U1RRL7	Protein MMP24-AS1 OS=Homo sapiens GN=MMP24-AS1 PE=1 SV=1 - [A0A0U1RRL7_HUMAN]	36.62	1	1	1	71	7.6747	4.71631				1.08033	1								0.878275	1								1.04229	1								0.989539	1
O95571	Persulfide dioxygenase ETHE1, mitochondrial OS=Homo sapiens GN=ETHE1 PE=1 SV=2 - [ETHE1_HUMAN]	36.61	7	7	20	254	27.8551	6.82959	1.02718	7	3.20122	1.02985	8	4.92806	0.99705	5	8.73137	1.03746	7	5.54085	1.05279	8	4.07034	1.04127	5	7.23337	0.994811	7	6.01648	0.969021	8	3.87686	0.966931	5	12.0478	1.02231	7	9.03615	0.999447	8	2.37407	1.06658	5	5.8168
Q9NX24	H/ACA ribonucleoprotein complex subunit 2 OS=Homo sapiens GN=NHP2 PE=1 SV=1 - [NHP2_HUMAN]	36.6	4	4	12	153	17.1899	8.22119	1.08682	4	5.26073	1.07488	4	8.8558	1.0328	4	9.89661	1.01487	4	13.0272	1.0412	4	7.17502	0.989322	4	5.59088	1.03252	4	0.47104	0.915999	4	2.52173	0.973149	4	11.0503	0.823849	4	4.17459	0.999355	4	4.26318	1.05649	4	5.51669
Q7L014	Probable ATP-dependent RNA helicase DDX46 OS=Homo sapiens GN=DDX46 PE=1 SV=2 - [DDX46_HUMAN]	36.57	36	36	121	1031	117.29	9.29053	1.03226	42	7.07726	0.981619	39	7.25495	0.96847	40	10.4558	0.924908	42	12.3756	1.04498	39	7.8476	1.03273	40	10.7319	1.05198	42	7.8767	0.961818	39	7.06253	1.00384	40	16.2539	0.941847	42	8.13398	1.01176	39	8.21656	1.00718	40	6.43491
M0R2N0	Protein SMG9 (Fragment) OS=Homo sapiens GN=SMG9 PE=1 SV=1 - [M0R2N0_HUMAN]	36.54	3	3	4	156	16.6225	9.68604	1.03561	1		1.07292	1		0.997292	2	6.78735	0.917258	1		0.903123	1		0.920614	2	7.84331	1.07792	1		0.869491	1		0.925056	2	10.0955	0.930424	1		1.14139	1		1.1748	2	22.5617
Q9UKK9	ADP-sugar pyrophosphatase OS=Homo sapiens GN=NUDT5 PE=1 SV=1 - [NUDT5_HUMAN]	36.53	8	8	44	219	24.3122	4.94482	0.985568	17	6.84585	0.964545	13	7.60873	0.908213	14	2.88309	1.01581	17	10.0265	1.02404	13	6.72534	1.07601	14	7.25227	0.993283	17	7.45358	0.981222	13	12.5765	0.943804	14	14.5616	1.03776	17	7.77737	1.01903	13	6.32435	1.07481	14	9.13917
B2R5U1	cDNA, FLJ92620, highly similar to Homo sapiens staphylococcal nuclease domain containing 1 (SND1),mRNA OS=Homo sapiens PE=2 SV=1 - [B2R5U1_HUMAN]	36.5	2	30	108	885	99.6093	6.96143	0.993865	2	2.18767	0.981873	2	12.3221	0.999319	5	11.4493	1.02761	2	10.7208	1.00645	2	0.398737	0.997318	5	14.2427	0.964438	2	0.50026	1.05461	2	5.47283	1.04289	5	15.7884	1.04737	2	5.90071	0.958613	2	7.43405	0.930094	5	7.56844
M0R0F0	40S ribosomal protein S5 (Fragment) OS=Homo sapiens GN=RPS5 PE=1 SV=1 - [M0R0F0_HUMAN]	36.5	8	8	75	200	22.3768	9.5542	1.10446	21	13.5413	1.1193	29	10.5449	1.01925	25	8.69154	0.889557	21	24.3524	0.862618	29	11.6071	1.03469	25	6.63488	1.11087	21	7.87002	1.14305	29	7.07857	0.985576	25	20.4841	0.817947	21	15.1927	0.869341	29	12.829	0.974206	25	9.24913
Q08257	Quinone oxidoreductase OS=Homo sapiens GN=CRYZ PE=1 SV=1 - [QOR_HUMAN]	36.47	11	11	40	329	35.1845	8.44092	0.976426	17	5.63851	0.969172	12	4.42879	0.944964	11	8.52889	1.01899	17	6.61411	1.0194	12	6.98236	0.99181	11	4.63024	0.991533	17	5.00114	1.00023	12	7.69047	1.029	11	6.25116	1.01079	17	5.76946	1.00931	12	2.32984	1.00529	11	8.35393
J9R021	Eukaryotic translation initiation factor 3 subunit A OS=Homo sapiens GN=eIF3a PE=2 SV=1 - [J9R021_HUMAN]	36.47	48	48	176	1382	166.381	6.78564	1.00649	63	9.60824	0.972003	62	7.30913	0.981039	51	10.5879	0.980258	63	14.4348	1.01016	62	9.72715	1.00729	51	9.07467	1.0556	63	8.9337	1.02171	62	6.69671	1.05559	51	15.2961	0.957163	63	12.5906	1.01139	62	7.50617	0.981482	51	11.5989
R4GN98	Protein S100 (Fragment) OS=Homo sapiens GN=S100A6 PE=1 SV=1 - [R4GN98_HUMAN]	36.47	4	4	49	85	9.67506	5.45264	0.970558	8	5.61143	0.978296	16	14.3016	1.08691	25	14.9251	1.02143	8	9.16462	0.893813	16	13.7968	0.820645	25	13.8202	0.975478	8	4.27087	1.29922	16	25.4422	1.0678	25	11.1871	1.08039	8	11.8149	0.865027	16	31.3153	1.10917	25	10.5614
O75534	Cold shock domain-containing protein E1 OS=Homo sapiens GN=CSDE1 PE=1 SV=2 - [CSDE1_HUMAN]	36.47	26	26	78	798	88.8289	6.25244	1.03234	36	7.62888	1.00396	16	6.77907	1.04556	26	10.0949	0.932491	36	15.1677	0.960211	16	4.35455	0.930229	26	5.55634	1.03806	36	7.60164	1.03907	16	5.69772	1.08731	26	8.42093	0.970435	36	8.95376	0.996013	16	4.73079	0.916281	26	5.65994
P62263	40S ribosomal protein S14 OS=Homo sapiens GN=RPS14 PE=1 SV=3 - [RS14_HUMAN]	36.42	5	5	84	151	16.2625	10.0522	1.03919	32	8.84105	1.09466	22	5.85327	0.999554	30	12.3886	0.851571	32	17.4641	0.880657	22	10.9015	0.977603	30	9.06556	1.06815	32	8.50256	1.10128	22	7.46224	0.996492	30	9.71916	0.942579	32	16.6121	0.937887	22	5.62886	0.978474	30	8.39639
A0A087WVZ9	DNA-directed RNA polymerases I, II, and III subunit RPABC1 OS=Homo sapiens GN=POLR2E PE=1 SV=1 - [A0A087WVZ9_HUMAN]	36.41	6	6	19	184	21.4461	7.44482	1.03142	6	6.67107	1.00918	5	5.27068	1.04981	8	10.884	1.05077	6	6.03327	1.00899	5	3.18704	0.971024	8	7.10413	0.97514	6	7.80996	0.949472	5	7.17563	1.03416	8	9.16558	0.973184	6	8.095	0.972639	5	11.3867	0.96595	8	3.07556
Q09666	Neuroblast differentiation-associated protein AHNAK OS=Homo sapiens GN=AHNAK PE=1 SV=2 - [AHNK_HUMAN]	36.37	59	90	229	5890	628.699	6.15088	1.04198	39	8.20878	1.02659	38	6.46754	0.972364	48	9.78828	0.945092	39	9.10235	0.943806	38	8.73575	1.02263	48	8.33766	1.0186	39	6.44639	1.00126	38	8.80496	0.966787	48	12.6843	0.92925	39	12.5296	0.99714	38	7.24902	1.01938	48	8.93314
O43583	Density-regulated protein OS=Homo sapiens GN=DENR PE=1 SV=2 - [DENR_HUMAN]	36.36	5	5	15	198	22.0781	5.30029	0.981582	6	11.2682	0.959555	4	2.87301	0.871188	5	4.37903	1.03734	6	7.29928	1.05615	4	2.8961	1.08044	5	4.12966	0.961628	6	8.24988	0.99497	4	6.05106	0.981649	5	11.2589	1.06798	6	13.3167	1.03829	4	1.0133	1.03888	5	5.51531
P52907	F-actin-capping protein subunit alpha-1 OS=Homo sapiens GN=CAPZA1 PE=1 SV=3 - [CAZA1_HUMAN]	36.36	5	7	28	286	32.9023	5.69385	1.05805	5	4.56944	0.941522	5	7.52256	1.02617	5	3.12297	0.857445	5	3.93534	1.08348	5	2.11538	1.11414	5	11.6736	1.01009	5	6.29726	0.986966	5	5.19718	0.958058	5	24.4555	0.968669	5	9.81963	0.990237	5	3.88701	0.938198	5	9.81478
P35241	Radixin OS=Homo sapiens GN=RDX PE=1 SV=1 - [RADI_HUMAN]	36.36	11	26	101	583	68.5214	6.3667	1.04112	8	7.35544	0.965284	4	11.2149	0.942152	7	10.9984	0.944647	8	10.3486	1.0296	4	9.60187	1.01094	7	6.21692	1.00212	8	3.47804	0.981031	4	10.3058	1.04077	7	8.50978	0.996461	8	8.90073	1.02996	4	2.26237	0.986765	7	6.15545
A8K3S1	Glucosamine-6-phosphate isomerase OS=Homo sapiens PE=2 SV=1 - [A8K3S1_HUMAN]	36.33	4	9	25	289	32.6576	6.91748	1.00816	4	8.0515	0.894506	2	1.05007	0.888518	3	3.34905	0.997099	4	2.22242	1.13987	2	4.57585	1.09009	3	10.767	0.944087	4	6.20893	0.95334	2	1.36093	1.07278	3	13.6471	1.08474	4	9.79801	1.03066	2	4.51328	0.945053	3	6.75242
P25787	Proteasome subunit alpha type-2 OS=Homo sapiens GN=PSMA2 PE=1 SV=2 - [PSA2_HUMAN]	36.32	6	6	44	234	25.8823	7.43018	1.01257	17	8.06508	1.05786	15	4.55874	0.971261	12	15.7712	0.991202	17	13.4938	0.974627	15	5.59071	1.12645	12	8.49979	1.04177	17	8.18922	1.04081	15	9.5133	0.733209	12	35.7111	0.991603	17	12.2911	0.953584	15	10.121	1.14188	12	17.2703
P49736	DNA replication licensing factor MCM2 OS=Homo sapiens GN=MCM2 PE=1 SV=4 - [MCM2_HUMAN]	36.28	29	29	116	904	101.832	5.51611	1.05171	46	7.40712	1.00882	33	6.94538	1.05726	37	7.63681	0.924969	46	10.8879	1.01095	33	5.43659	0.993339	37	8.84518	1.05489	46	6.44225	1.0006	33	5.72718	1.02718	37	13.4697	0.923914	46	13.918	0.966902	33	5.55633	0.957078	37	12.0391
P22234	Multifunctional protein ADE2 OS=Homo sapiens GN=PAICS PE=1 SV=3 - [PUR6_HUMAN]	36.24	16	16	103	425	47.0491	7.2251	1.02618	34	7.43832	0.993224	36	9.28738	0.939276	33	10.5363	0.96055	34	13.8175	1.01229	36	8.76711	1.05545	33	6.37358	0.995406	34	8.07855	0.979088	36	6.98015	0.923229	33	15.9402	1.01117	34	10.4091	0.996683	36	7.49763	1.00507	33	13.893
Q6FI81	Anamorsin OS=Homo sapiens GN=CIAPIN1 PE=1 SV=2 - [CPIN1_HUMAN]	36.22	12	12	29	312	33.5611	5.61768	1.0438	12	12.0839	0.986943	8	5.1999	1.02381	9	9.97247	0.902637	12	8.94149	1.08421	8	5.26132	0.977773	9	4.07269	1.08604	12	7.16897	0.95817	8	12.295	0.973015	9	13.116	0.8963	12	11.5795	0.94468	8	5.09298	0.991797	9	11.4757
P61289	Proteasome activator complex subunit 3 OS=Homo sapiens GN=PSME3 PE=1 SV=1 - [PSME3_HUMAN]	36.22	10	10	49	254	29.4876	5.94775	1.03871	19	11.3761	0.997818	11	9.68431	1.0228	19	10.8354	0.990362	19	21.2531	1.0003	11	8.10042	1.0238	19	10.3421	0.999186	19	14.2465	1.02096	11	4.75703	0.973321	18	15.0082	0.941965	19	26.1218	0.987769	11	11.2858	1.02438	19	13.0761
Q9Y3U8	60S ribosomal protein L36 OS=Homo sapiens GN=RPL36 PE=1 SV=3 - [RL36_HUMAN]	36.19	4	5	33	105	12.2459	11.5903	1.09514	14	2.17837	1.13532	8	5.15877	1.03467	9	9.27204	0.866885	14	6.66627	0.911039	8	7.48274	1.00493	9	7.19204	1.11048	14	5.21218	1.06383	8	4.17881	1.03446	9	10.4639	0.846224	14	12.9439	0.844078	8	8.60977	0.948814	9	3.3651
A0A0F7NGI8	Leucine rich repeat (In FLII) interacting protein 1, isoform CRA_c OS=Homo sapiens GN=LRRFIP1 PE=2 SV=1 - [A0A0F7NGI8_HUMAN]	36.17	22	23	73	752	82.6386	4.61475	1.00728	20	8.07699	0.940562	26	12.9945	0.884741	20	9.61314	1.04444	20	5.62931	1.01614	26	7.90234	1.00572	20	6.91633	0.965342	20	5.31742	0.992993	26	6.03199	1.00942	20	16.1659	1.05396	20	14.5492	1.01947	26	7.26736	1.00104	20	11.9623
P61158	Actin-related protein 3 OS=Homo sapiens GN=ACTR3 PE=1 SV=3 - [ARP3_HUMAN]	36.12	14	14	65	418	47.341	5.88428	0.94651	22	11.2159	0.95622	20	8.28093	0.999151	23	8.40754	0.987674	22	9.96944	1.00941	20	10.5955	0.985778	23	6.73569	0.99068	22	10.9506	1.01312	20	8.8222	1.05002	23	12.3743	1.0388	22	21.3058	1.02341	20	7.05732	0.971124	23	8.80916
A0A087X1A5	Double-stranded RNA-binding protein Staufen homolog 1 OS=Homo sapiens GN=STAU1 PE=1 SV=1 - [A0A087X1A5_HUMAN]	36.11	9	15	32	493	54.9116	9.67139	0.994403	8	3.57996	0.984471	5	9.96487	1.1443	4	7.5366	0.993321	8	4.86594	1.00743	5	6.3851	0.834489	4	13.2949	1.04209	8	5.26474	1.0056	5	3.4776	1.23695	4	6.3767	1.02896	8	11.4979	1.00782	5	2.78123	0.861757	4	3.10796
Q6IBS0	Twinfilin-2 OS=Homo sapiens GN=TWF2 PE=1 SV=2 - [TWF2_HUMAN]	36.1	7	10	31	349	39.5233	6.84424	0.960992	7	6.53972	1.02144	9	7.539	0.949337	6	9.65063	0.957511	7	8.53336	0.980324	9	2.98116	1.02236	6	6.75852	1.03937	7	4.03075	1.06666	9	5.59871	0.924387	6	16.2614	1.0171	7	10.8481	0.993943	9	7.97664	1.17982	6	8.14502
Q05CW7	NAT10 protein (Fragment) OS=Homo sapiens GN=NAT10 PE=2 SV=1 - [Q05CW7_HUMAN]	36.1	1	16	35	554	62.345	9.26123	1.11721	1								1.06637	1								0.897499	1								0.931591	1
P11766	Alcohol dehydrogenase class-3 OS=Homo sapiens GN=ADH5 PE=1 SV=4 - [ADHX_HUMAN]	36.1	12	12	37	374	39.6984	7.48877	1.00976	11	8.5588	0.951479	10	4.13455	0.929399	16	9.09996	1.03009	11	8.3673	1.02859	10	6.69428	1.04463	16	5.57931	0.9821	11	3.31942	1.01486	10	4.45944	1.04542	16	14.3617	0.96416	11	14.7479	0.990392	10	6.72203	0.979676	16	11.4017
Q14651	Plastin-1 OS=Homo sapiens GN=PLS1 PE=1 SV=2 - [PLSI_HUMAN]	36.09	15	20	77	629	70.2093	5.41455	0.950455	19	7.85681	0.98237	15	6.9489	0.967933	21	12.5698	0.997012	19	12.8945	0.95936	15	7.39759	1.00352	21	13.021	1.00816	19	10.5426	1.02483	15	11.6829	0.9753	21	26.0322	1.03503	19	11.8443	0.985688	15	7.99181	1.01871	21	17.0957
P35249	Replication factor C subunit 4 OS=Homo sapiens GN=RFC4 PE=1 SV=2 - [RFC4_HUMAN]	36.09	11	11	29	363	39.6569	8.01611	1.02627	8	6.08212	1.01887	12	2.94646	1.04916	9	5.80377	0.997663	8	5.52331	1.03969	12	6.18335	0.991813	9	5.21284	1.01182	8	2.63623	0.955815	12	5.43703	0.962103	9	16.9772	0.938833	8	3.26489	0.994267	12	3.55687	0.981918	9	7.5498
Q7RTQ9	Kinesin light chain 1A OS=Homo sapiens GN=KNS2 PE=2 SV=1 - [Q7RTQ9_HUMAN]	36.06	11	18	41	538	61.164	5.75732	1.01896	8	11.8277	1.0021	11	1.96138	0.982203	11	9.45175	0.953839	8	11.7915	0.937059	11	9.10791	0.964739	11	9.92484	1.01673	8	4.53004	0.992993	11	6.56503	1.0825	11	17.6168	1.02487	8	14.8311	1.02731	11	7.405	0.957564	11	15.45
F5H345	Porphobilinogen deaminase OS=Homo sapiens GN=HMBS PE=1 SV=1 - [F5H345_HUMAN]	36.06	10	10	40	330	35.7388	6.96143	1.03636	13	8.25655	1.00631	11	5.05102	0.923919	16	7.87122	0.932479	13	9.03012	1.01536	11	4.3784	1.10065	16	4.78238	1.06093	13	5.32081	0.994477	11	7.57462	0.89795	16	8.02416	0.909336	13	6.01818	0.977703	11	6.47376	1.04015	16	10.4536
Q9BV61	TRAP1 protein (Fragment) OS=Homo sapiens GN=TRAP1 PE=2 SV=2 - [Q9BV61_HUMAN]	36.05	21	22	148	699	79.3072	7.79639	0.988767	32	5.37424	1.01335	35	6.43856	0.991379	27	7.2205	0.987579	32	11.036	1.01763	35	5.06189	1.04366	27	6.02475	1.01648	32	7.05465	0.974259	35	3.45323	0.98664	27	15.3147	1.00454	32	6.75121	0.9983	35	4.90034	0.99259	27	8.01562
P11388	DNA topoisomerase 2-alpha OS=Homo sapiens GN=TOP2A PE=1 SV=3 - [TOP2A_HUMAN]	36.05	38	52	169	1531	174.276	8.71924	1.0515	42	8.63354	1.15377	43	7.21053	1.20549	33	12.5907	0.948352	42	9.90925	1.03495	43	6.88615	0.935351	33	7.91265	1.08133	42	8.1368	0.910872	43	8.41448	0.964965	33	22.034	0.842731	42	13.604	0.879435	43	9.83651	0.951779	33	11.6906
Q5TEC6	Histone H3 OS=Homo sapiens GN=HIST2H3PS2 PE=1 SV=1 - [Q5TEC6_HUMAN]	36.03	4	7	65	136	15.4206	11.2681	1.02407	6	26.1784	1.0829	9	21.5706	1.10136	10	16.5329	0.855838	6	45.8607	0.982654	9	24.9222	0.741399	10	12.4009	1.18284	6	8.89479	1.10402	9	8.2609	1.15318	10	12.4804	0.891801	6	26.1786	0.932551	9	7.48168	1.03724	10	6.72544
H3BPJ9	NADH dehydrogenase [ubiquinone] 1 beta subcomplex subunit 10 OS=Homo sapiens GN=NDUFB10 PE=1 SV=1 - [H3BPJ9_HUMAN]	36.02	5	5	16	161	19.2456	8.70459	1.08537	6	4.73215	1.07489	5	3.57273	1.11844	5	10.6871	0.870769	6	12.0698	1.05133	5	4.48898	0.965499	5	9.78513	1.05243	6	5.90931	0.955345	5	4.22703	1.14728	5	5.75294	0.939109	6	15.1649	0.978155	5	0.866693	0.9487	5	20.2426
O15144	Actin-related protein 2/3 complex subunit 2 OS=Homo sapiens GN=ARPC2 PE=1 SV=1 - [ARPC2_HUMAN]	36	11	11	56	300	34.3115	7.35693	0.998068	20	7.747	0.977461	14	5.41941	0.945441	22	4.14237	0.996667	20	8.68368	1.0338	14	5.91964	1.03306	22	4.15064	1.00781	20	5.36586	1.00071	14	4.32582	0.993688	22	8.76352	0.98057	20	8.73219	0.983865	14	6.63858	1.03125	22	11.3724
P62851	40S ribosomal protein S25 OS=Homo sapiens GN=RPS25 PE=1 SV=1 - [RS25_HUMAN]	36	6	6	68	125	13.7337	10.1108	1.11034	22	6.42301	1.05343	19	3.59313	1.04751	27	14.4548	0.808555	22	12.2858	0.910609	19	6.41793	1.03094	27	8.3941	1.10445	22	14.1028	1.0952	19	11.0245	0.930581	27	11.8795	0.814147	22	22.3591	0.9458	19	7.99271	0.983573	27	5.80315
Q14204	Cytoplasmic dynein 1 heavy chain 1 OS=Homo sapiens GN=DYNC1H1 PE=1 SV=5 - [DYHC1_HUMAN]	35.99	148	148	551	4646	532.072	6.40479	0.99292	207	6.83505	0.986441	166	6.78949	0.999975	177	11.4588	1.002	207	8.76013	0.985443	166	7.47975	1.02934	177	9.28234	0.994383	207	6.85859	1.01918	166	7.42837	0.98628	177	17.0605	1.02154	207	8.85114	1.00613	166	6.82441	0.986549	177	12.3705
A0A024R0J9	Heterogeneous nuclear ribonucleoprotein U-like 1, isoform CRA_a OS=Homo sapiens GN=HNRPUL1 PE=4 SV=1 - [A0A024R0J9_HUMAN]	35.98	21	22	69	756	84.741	8.77783	1.00605	26	7.83757	0.967364	20	6.55731	0.986483	22	9.31459	1.01907	26	9.36863	1.09628	20	8.43665	1.0307	22	7.8426	1.0139	26	6.0788	0.937421	20	10.0835	0.988269	22	12.4268	0.955064	26	12.6433	1.02598	20	7.8034	0.997169	22	8.3518
A0A0J9YWR7	Armadillo repeat-containing protein 10 (Fragment) OS=Homo sapiens GN=ARMC10 PE=1 SV=1 - [A0A0J9YWR7_HUMAN]	35.95	5	5	8	153	17.0244	8.03076	0.993236	4	9.78656	1.08901	2	1.90636	1.10164	2	7.04682	1.09173	4	20.5183	1.01712	2	1.48624	0.932726	2	20.8707	0.938665	4	12.3565	0.927269	2	1.07202	1.19129	2	17.2611	1.005	4	9.5185	0.961053	2	0.134139	0.766128	2	4.53015
P49321	Nuclear autoantigenic sperm protein OS=Homo sapiens GN=NASP PE=1 SV=2 - [NASP_HUMAN]	35.91	18	25	80	788	85.1861	4.29736	1.04146	17	9.79087	1.00349	19	8.68044	0.975258	18	8.65848	0.998636	17	8.65476	1.00234	19	13.3049	1.01102	18	6.9416	1.00507	17	6.47772	0.98643	19	12.8937	0.948479	18	19.2901	0.947525	17	14.5821	1.00138	19	7.85707	1.05647	18	10.7495
P60520	Gamma-aminobutyric acid receptor-associated protein-like 2 OS=Homo sapiens GN=GABARAPL2 PE=1 SV=1 - [GBRL2_HUMAN]	35.9	4	4	5	117	13.6581	8.104	1.06995	1		1.09335	2	8.02208	0.885004	2	6.06863	1.01014	1		0.938458	2	7.65219	1.11817	2	0.0228143	1.0207	1		1.02033	2	1.64869	0.872577	2	6.46021	0.877074	1		0.936824	2	4.6938	1.0876	2	0.947563
Q9BY44	Eukaryotic translation initiation factor 2A OS=Homo sapiens GN=EIF2A PE=1 SV=3 - [EIF2A_HUMAN]	35.9	18	18	61	585	64.9492	8.86572	1.08555	17	6.93271	0.978627	22	6.01939	0.930118	22	6.51504	0.81998	17	11.6694	0.994065	22	2.86567	1.08878	22	5.53555	1.13038	17	11.6996	1.00951	22	3.35445	0.956997	22	12.569	0.852356	17	13.8398	1.01447	22	6.20374	1.0397	22	11.7727
Q9NZI8	Insulin-like growth factor 2 mRNA-binding protein 1 OS=Homo sapiens GN=IGF2BP1 PE=1 SV=2 - [IF2B1_HUMAN]	35.88	17	20	49	577	63.4412	9.20264	0.949108	13	3.94831	0.990139	12	5.42598	0.974562	15	9.91094	1.04788	13	11.0031	1.00379	12	10.9475	1.02431	15	10.0013	1.00405	13	3.89659	0.978708	12	3.0409	0.993539	15	12.5221	1.02265	13	7.27151	1.00174	12	8.74974	0.95288	15	12.4417
Q5T6H7	Xaa-Pro aminopeptidase 1 OS=Homo sapiens GN=XPNPEP1 PE=1 SV=1 - [Q5T6H7_HUMAN]	35.87	8	18	42	552	62.0995	5.73193	0.968116	9	10.2156	0.942704	5	2.56491	0.956947	9	8.05768	0.9838	9	11.6235	0.969844	5	4.28764	1.0207	9	7.14991	0.970389	9	9.11802	0.990776	5	6.04415	1.01528	9	12.1764	1.02122	9	18.0159	1.06571	5	2.23676	1.03223	9	7.89943
Q9Y2Z4	Tyrosine--tRNA ligase, mitochondrial OS=Homo sapiens GN=YARS2 PE=1 SV=2 - [SYYM_HUMAN]	35.85	13	13	40	477	53.1657	8.98291	1.0273	14	5.37362	1.03425	14	3.51238	1.01883	12	8.14913	1.00626	14	7.64991	1.00426	14	6.48552	1.00092	12	10.5612	1.02412	14	2.76014	1.03139	14	9.57571	0.967175	12	22.6719	0.985466	14	6.54154	0.929862	14	8.73998	1.00298	12	10.1863
Q9Y2R0	Cytochrome c oxidase assembly factor 3 homolog, mitochondrial OS=Homo sapiens GN=COA3 PE=1 SV=1 - [COA3_HUMAN]	35.85	4	4	13	106	11.7241	9.59814	0.943331	4	7.5148	1.00048	5	7.27241	1.14187	4	14.2843	1.10577	4	1.96447	0.995152	5	2.30714	0.849019	4	4.34498	0.971284	4	1.03032	1.01569	5	7.38716	1.19265	4	9.25791	1.04199	4	4.29504	1.05846	5	5.49107	0.907346	4	9.18489
I1VE18	SEC22 vesicle trafficking protein B (Fragment) OS=Homo sapiens GN=SEC22B PE=3 SV=1 - [I1VE18_HUMAN]	35.85	1	1	1	53	6.11905	4.94482	0.839095	1								1.15083	1								1.01464	1								1.09173	1
I1VE17	SEC22 vesicle trafficking protein B (Fragment) OS=Homo sapiens GN=SEC22B PE=3 SV=1 - [I1VE17_HUMAN]	35.85	1	1	1	53	6.14004	4.88135				1.07535	1								0.993898	1								1.04526	1								0.88368	1
A0A087WYS1	UTP--glucose-1-phosphate uridylyltransferase OS=Homo sapiens GN=UGP2 PE=1 SV=1 - [A0A087WYS1_HUMAN]	35.83	14	14	54	508	56.9318	7.88428	0.969076	23	6.14462	1.00479	14	5.52921	0.975911	17	6.57005	1.05927	23	5.21371	0.976837	14	6.42271	1.00155	17	9.56848	0.979386	23	3.56008	1.00566	14	6.86948	0.980688	17	16.8814	1.00966	23	8.46013	0.987836	14	6.32792	0.968014	17	10.2869
A0A087WYF7	MICOS complex subunit OS=Homo sapiens GN=APOOL PE=1 SV=1 - [A0A087WYF7_HUMAN]	35.82	7	7	21	268	29.1862	9.45166	0.997271	6	9.09752	1.05858	7	3.03536	1.02287	8	9.27954	1.0984	6	12.2787	1.00249	7	2.77888	1.0816	8	9.10188	0.911873	6	4.14102	0.98414	7	9.02717	0.808846	8	29.2794	1.03321	6	4.00544	0.960481	7	8.71037	1.06608	8	17.3267
Q3SYF1	Sorting nexin 12 OS=Homo sapiens GN=SNX12 PE=2 SV=1 - [Q3SYF1_HUMAN]	35.8	4	6	14	162	18.8727	8.44092	0.933047	2	9.26913	1.03029	3	2.69088	1.03692	4	7.32172	0.983721	2	16.5716	0.916258	3	8.2074	0.907379	4	1.9888	1.12563	2	3.0869	0.999787	3	1.09127	1.09414	4	7.66991	0.942314	2	2.80614	1.08208	3	11.4998	0.975533	4	2.98502
P31689	DnaJ homolog subfamily A member 1 OS=Homo sapiens GN=DNAJA1 PE=1 SV=2 - [DNJA1_HUMAN]	35.77	11	13	37	397	44.8395	7.07861	1.00267	15	4.97848	0.959897	10	5.62324	1.0222	6	6.91625	0.997816	15	10.1031	0.997212	10	4.53431	0.94922	6	4.53785	1.01273	15	6.98403	0.983922	10	7.64888	1.15581	6	7.91103	0.967676	15	10.4961	1.03008	10	2.04381	0.894292	6	7.84144
P30519	Heme oxygenase 2 OS=Homo sapiens GN=HMOX2 PE=1 SV=2 - [HMOX2_HUMAN]	35.76	9	9	24	316	36.0098	5.41455	0.931695	10	4.86208	0.960733	6	3.52286	1.00568	8	3.95063	1.05685	10	11.2199	1.04039	6	4.06817	1.00428	8	7.96625	1.03216	10	6.28936	0.975031	6	1.18101	1.08	8	13.5782	1.00266	10	5.1797	1.04101	6	2.59186	0.943672	8	7.80509
J3QR09	Ribosomal protein L19 OS=Homo sapiens GN=RPL19 PE=1 SV=1 - [J3QR09_HUMAN]	35.75	8	9	60	193	23.1201	11.4731	1.05334	16	8.93576	1.07837	20	9.66336	1.01168	21	6.03054	0.762372	16	19.2737	0.807943	20	14.7574	0.982336	21	6.77396	1.27834	16	15.7644	1.17586	20	17.0957	1.02002	21	13.7129	0.794736	16	12.5482	0.852734	20	14.8393	0.990441	21	9.3862
E9PLK3	Puromycin-sensitive aminopeptidase OS=Homo sapiens GN=NPEPPS PE=1 SV=1 - [E9PLK3_HUMAN]	35.74	29	29	141	915	102.922	5.60498	0.962837	55	6.38265	0.980895	44	7.26857	1.01864	42	7.20893	1.04249	55	8.20156	1.0197	44	6.50313	1.00732	42	5.49745	0.973807	55	5.44712	1.01722	44	6.17394	1.02605	42	11.6454	1.04157	55	9.85192	1.00826	44	5.439	0.965498	42	7.98947
A8K7D9	Importin subunit alpha OS=Homo sapiens PE=2 SV=1 - [A8K7D9_HUMAN]	35.73	14	14	60	529	57.7979	5.40186	1.14588	24	5.39072	1.16325	16	7.75213	1.12459	18	8.2606	0.794399	24	12.0788	0.94566	16	8.21645	0.898218	18	9.40444	1.14025	24	10.6612	1.01396	16	7.0425	0.946211	18	17.8714	0.821515	24	27.4506	0.901552	16	7.32016	1.10307	18	2.63631
P33992	DNA replication licensing factor MCM5 OS=Homo sapiens GN=MCM5 PE=1 SV=5 - [MCM5_HUMAN]	35.69	23	23	98	734	82.2332	8.36768	1.02282	41	8.14327	0.974584	32	3.14519	1.02803	25	11.6562	0.958677	41	11.3123	1.03159	32	6.90143	0.989817	25	8.00324	1.04976	41	6.20001	0.987793	32	4.94475	1.05602	25	13.4438	0.929681	41	19.7256	0.985834	32	6.10225	0.942585	25	9.43188
D3DND1	CDV3 homolog (Mouse), isoform CRA_a OS=Homo sapiens GN=CDV3 PE=4 SV=1 - [D3DND1_HUMAN]	35.66	6	6	26	258	28.5815	9.43701	1.03984	10	5.12717	0.926515	7	2.06635	0.921341	9	4.32839	0.994698	10	12.355	1.04002	7	5.17352	1.0625	9	6.85868	1.00339	10	7.55105	0.969001	7	5.13335	0.884596	9	12.3327	0.972327	10	8.20982	1.05875	7	4.4609	1.13513	9	7.65168
P43686	26S protease regulatory subunit 6B OS=Homo sapiens GN=PSMC4 PE=1 SV=2 - [PRS6B_HUMAN]	35.65	16	16	98	418	47.3365	5.21143	1.03613	38	4.7128	0.988129	29	7.67033	0.921535	30	10.9367	0.949991	38	11.8641	0.988386	29	9.94785	1.0396	30	6.26689	1.02956	38	8.91562	1.02264	29	5.16491	0.931662	30	14.9672	0.938266	38	11.7407	0.991958	29	8.88745	1.07302	30	12.5104
P23246	Splicing factor, proline- and glutamine-rich OS=Homo sapiens GN=SFPQ PE=1 SV=2 - [SFPQ_HUMAN]	35.64	24	25	145	707	76.1016	9.43701	1.0287	58	9.92849	1.01013	43	8.0751	0.961981	40	12.5994	0.913562	58	14.0671	1.04854	43	8.63397	0.994259	40	9.91615	1.03449	58	9.89895	0.953147	43	9.66226	1.02559	40	20.7502	0.98135	58	15.2716	1.00577	43	6.16435	0.988632	40	13.5067
Q13283	Ras GTPase-activating protein-binding protein 1 OS=Homo sapiens GN=G3BP1 PE=1 SV=1 - [G3BP1_HUMAN]	35.62	12	13	142	466	52.1321	5.51611	1.02206	45	9.57164	0.978184	49	7.5443	1.03355	38	9.05541	0.936633	45	15.8694	0.982538	49	8.66513	0.95028	38	9.37225	1.04184	45	9.29789	1.05001	49	4.85306	0.973351	38	17.8501	0.967186	45	14.2799	0.990985	49	7.54011	1.0488	38	8.14718
Q5U071	High-mobility group box 2 OS=Homo sapiens PE=2 SV=1 - [Q5U071_HUMAN]	35.58	7	9	49	208	23.8897	8.1333	0.99856	14	7.6898	0.968542	12	6.42611	0.719028	9	13.8772	0.928351	14	15.0775	0.997435	12	9.92322	1.11101	9	5.84337	1.06514	14	14.3204	1.02512	12	8.85898	0.907499	9	7.88089	0.94151	14	18.7666	1.00104	12	7.92842	1.19261	9	29.18
Q16678	Cytochrome P450 1B1 OS=Homo sapiens GN=CYP1B1 PE=1 SV=2 - [CP1B1_HUMAN]	35.54	18	18	56	543	60.8073	8.98291	0.818834	17	8.56515	0.792536	19	12.6585	0.858501	20	21.0435	0.990263	17	9.8312	0.806502	19	11.6895	0.867974	20	17.7238	0.97658	17	7.19494	1.24786	19	14.2627	1.29431	20	11.7436	1.27234	17	13.0425	1.10122	19	7.1794	0.97239	20	19.1343
O00154	Cytosolic acyl coenzyme A thioester hydrolase OS=Homo sapiens GN=ACOT7 PE=1 SV=3 - [BACH_HUMAN]	35.53	11	11	47	380	41.7693	8.54346	0.989698	18	6.41528	1.02889	15	8.15321	0.999647	14	7.57283	0.949431	18	9.11875	0.957719	15	8.38292	1.05828	14	12.5155	1.03666	18	6.89956	1.02684	15	4.56215	0.985961	14	12.1782	0.999723	18	12.5679	0.974729	15	5.45947	0.960767	14	13.3908
Q13217	DnaJ homolog subfamily C member 3 OS=Homo sapiens GN=DNAJC3 PE=1 SV=1 - [DNJC3_HUMAN]	35.52	17	18	43	504	57.5442	6.15088	0.98397	10	4.57294	0.99432	17	9.0889	0.958062	12	5.56847	1.01123	10	10.9458	0.976323	17	8.15961	0.9153	12	3.87868	1.00691	10	6.3794	1.0197	17	8.43077	1.10197	12	14.2168	1.00022	10	9.02885	1.00173	17	5.84278	0.969474	12	7.22389
P67809	Nuclease-sensitive element-binding protein 1 OS=Homo sapiens GN=YBX1 PE=1 SV=3 - [YBOX1_HUMAN]	35.49	7	10	64	324	35.9027	9.87646	0.970138	12	11.7701	0.958883	16	10.6917	1.09919	13	13.6527	1.08421	12	8.28537	1.00868	16	16.5526	0.940349	13	20.1531	0.945865	12	10.6932	0.996131	16	12.2829	1.09789	13	8.67837	1.04274	12	18.7729	1.03721	16	8.73727	0.900691	13	23.5755
Q9BYG3	MKI67 FHA domain-interacting nucleolar phosphoprotein OS=Homo sapiens GN=NIFK PE=1 SV=1 - [MK67I_HUMAN]	35.49	11	11	33	293	34.201	9.87646	1.12355	13	9.21919	1.21777	7	19.135	0.943579	13	4.55179	0.711931	13	14.3155	0.727351	7	10.776	1.066	13	9.37218	1.18205	13	7.25149	1.05141	7	12.3638	0.944045	13	14.4202	0.82066	13	13.7253	0.839159	7	18.057	1.06159	13	11.17
Q96HE7	ERO1-like protein alpha OS=Homo sapiens GN=ERO1A PE=1 SV=2 - [ERO1A_HUMAN]	35.47	15	15	72	468	54.3581	5.68115	0.934519	26	9.65241	0.991597	25	6.79947	1.01951	21	10.8976	1.05914	26	16.749	0.994642	25	5.4653	0.985578	21	18.5855	0.976202	26	9.12787	1.00458	25	5.81299	0.847632	21	33.3504	1.05212	26	9.32706	1.02744	25	9.65066	0.955921	21	19.8119
P51991	Heterogeneous nuclear ribonucleoprotein A3 OS=Homo sapiens GN=HNRNPA3 PE=1 SV=2 - [ROA3_HUMAN]	35.45	12	15	151	378	39.5706	9.01221	1.03753	30	9.457	1.02772	27	5.93325	0.980078	32	11.8155	0.926944	30	13.0941	0.97796	27	9.25778	1.06604	32	6.74624	1.0666	30	8.4539	1.01279	27	8.5326	0.900983	32	21.3521	0.905859	30	12.3653	0.943469	27	12.106	1.04101	32	13.9018
H0Y3P2	Eukaryotic translation initiation factor 4 gamma 2 OS=Homo sapiens GN=EIF4G2 PE=1 SV=1 - [H0Y3P2_HUMAN]	35.44	28	28	80	869	98.0557	6.99072	0.958383	23	12.3591	1.02052	24	13.6455	0.949558	33	8.18549	1.02907	23	12.495	1.01721	24	10.2409	1.04543	33	13.4986	1.02167	23	8.88556	0.957198	24	7.78261	0.745687	33	50.2753	0.935032	23	13.6017	0.989773	24	8.98838	1.12704	33	21.9185
B2RBP3	cDNA, FLJ95615, highly similar to Homo sapiens ubiquitin-activating enzyme E1C (UBA3 homolog, yeast)(UBE1C), mRNA OS=Homo sapiens PE=2 SV=1 - [B2RBP3_HUMAN]	35.42	14	14	40	463	51.7893	5.45264	1.03089	13	4.09596	0.969496	13	12.0973	0.972799	14	6.48046	0.927347	13	9.27115	1.03502	13	7.91476	1.05997	14	2.61972	1.02751	13	4.07152	1.05184	13	12.8914	0.975318	14	7.98761	0.98479	13	9.35956	0.990416	13	18.3547	1.03604	14	16.9578
P36543	V-type proton ATPase subunit E 1 OS=Homo sapiens GN=ATP6V1E1 PE=1 SV=1 - [VATE1_HUMAN]	35.4	9	9	37	226	26.1288	8.00146	0.993309	6	4.27331	0.943647	15	10.8042	0.918797	15	10.3971	1.06438	6	3.83275	1.0405	15	8.24965	1.01763	15	3.79272	0.970271	6	3.8909	1.00208	15	6.09889	1.04874	15	10.1352	1.01266	6	12.6179	1.0014	15	6.61683	1.01279	15	11.982
Q9UJZ1	Stomatin-like protein 2, mitochondrial OS=Homo sapiens GN=STOML2 PE=1 SV=1 - [STML2_HUMAN]	35.39	9	9	45	356	38.5102	7.38623	1.02932	10	6.17519	1.00874	18	6.90809	0.944537	17	11.7259	0.974089	10	8.44211	1.05868	18	6.37865	1.02313	17	5.90567	1.01831	10	9.53422	0.956225	18	5.50832	0.99725	17	6.47309	0.983162	10	11.2143	1.00647	18	3.58823	1.02308	17	5.88005
E9PID8	Cleavage stimulation factor subunit 2 OS=Homo sapiens GN=CSTF2 PE=1 SV=1 - [E9PID8_HUMAN]	35.39	11	11	36	438	46.6365	8.03076	1.05268	14	7.4305	1.00667	9	4.88174	1.01843	13	8.36844	1.00162	14	5.25026	1.07838	9	1.76945	0.976405	13	4.25628	1.01753	14	7.33108	0.947873	9	5.45257	0.948928	13	8.5516	0.913895	14	8.26355	1.00922	9	4.64025	1.0374	13	10.4945
Q86U75	Dihydropyrimidinase-like 2 OS=Homo sapiens PE=2 SV=1 - [Q86U75_HUMAN]	35.38	5	15	47	619	66.9753	5.99854	1.00781	4	5.29078	1.0722	4	4.78584	1.00986	7	4.6331	1.07337	4	8.30705	0.929967	4	7.56746	0.996655	7	6.66302	1.02966	4	4.60623	1.0814	4	9.70389	0.994448	7	16.5965	0.967236	4	8.15677	0.89799	4	12.9596	0.981758	7	10.8013
P35237	Serpin B6 OS=Homo sapiens GN=SERPINB6 PE=1 SV=3 - [SPB6_HUMAN]	35.37	10	10	22	376	42.5941	5.2749	0.951748	6	9.03172	1.01959	8	7.06881	1.05132	8	10.8444	1.14575	6	1.54338	1.04263	8	3.72493	0.980266	8	2.29476	0.871027	6	7.14288	0.959268	8	5.51629	0.972923	8	18.9587	1.17607	6	10.6254	0.979176	8	11.4322	0.963008	8	11.0412
Q9Y2S0	DNA-directed RNA polymerases I and III subunit RPAC2 OS=Homo sapiens GN=POLR1D PE=1 SV=1 - [RPAC2_HUMAN]	35.34	4	4	12	133	15.2274	5.79541	1.02362	5	5.01979	0.940899	4	2.77494	0.919846	3	1.90184	0.915849	5	11.041	1.03815	4	2.50024	1.03356	3	1.28819	1.00733	5	11.9213	0.911262	4	4.19876	1.04159	3	8.35229	1.0179	5	8.15799	1.07226	4	5.54093	1.02203	3	2.2339
P36404	ADP-ribosylation factor-like protein 2 OS=Homo sapiens GN=ARL2 PE=1 SV=4 - [ARL2_HUMAN]	35.33	6	6	16	184	20.8649	6.34131	0.960721	7	3.20124	0.999081	4	4.28473	0.989402	5	7.71844	1.02328	7	4.8589	1.0079	4	1.05284	1.06824	5	9.31129	0.994434	7	11.7916	1.00129	4	0.829161	0.934142	5	26.5189	1.01747	7	8.38424	1.00116	4	3.37385	0.847937	5	10.9209
B4E299	cDNA FLJ54574, highly similar to Staphylococcal nuclease domain-containing protein 1 OS=Homo sapiens PE=2 SV=1 - [B4E299_HUMAN]	35.32	1	29	100	889	99.6164	7.06396				0.961721	1								0.892491	1								1.09418	1								1.05454	1
E7EU96	Casein kinase II subunit alpha OS=Homo sapiens GN=CSNK2A1 PE=1 SV=1 - [E7EU96_HUMAN]	35.32	10	11	47	385	45.2819	7.94287	1.01574	15	4.77248	1.01091	11	7.74465	1.04373	14	6.48557	0.981742	15	5.24651	0.975873	11	7.58447	1.05129	14	8.68423	1.00243	15	14.1986	0.977174	11	5.25664	0.958156	14	9.10363	0.98314	15	5.7832	0.98535	11	10.5448	0.937567	14	8.06006
P05026	Sodium/potassium-transporting ATPase subunit beta-1 OS=Homo sapiens GN=ATP1B1 PE=1 SV=1 - [AT1B1_HUMAN]	35.31	10	10	41	303	35.0389	8.52881	1.00229	16	7.05059	1.02967	13	4.20011	1.09109	12	7.26692	1.03568	16	12.3822	1.01916	13	7.65986	0.924006	12	4.65808	0.994124	16	10.2205	0.992282	13	6.37988	1.09864	12	9.45824	1.03215	16	5.52645	0.941738	13	3.86427	0.905383	12	5.90041
P07602	Prosaposin OS=Homo sapiens GN=PSAP PE=1 SV=2 - [SAP_HUMAN]	35.31	18	18	104	524	58.0739	5.17334	1.00729	35	7.99444	0.984204	32	9.92967	0.947807	37	9.65782	1.05384	35	10.0779	0.994519	32	8.5165	0.988162	37	5.4511	0.960933	35	6.38535	1.00242	32	5.35809	1.06153	37	15.2467	1.01466	35	6.61953	1.00377	32	7.5925	1.00377	37	8.00513
J3QLC3	Protein VAC14 homolog (Fragment) OS=Homo sapiens GN=VAC14 PE=4 SV=1 - [J3QLC3_HUMAN]	35.29	1	1	1	17	1.92696	4.23389	0.957668	1								1.01039	1								0.982999	1								1.09262	1
H7C0E5	Zinc finger protein ZPR1 (Fragment) OS=Homo sapiens GN=ZPR1 PE=1 SV=1 - [H7C0E5_HUMAN]	35.23	12	12	39	386	42.6259	4.729	1.05508	14	5.87005	0.955432	11	4.17709	0.896062	14	8.30731	0.964834	14	12.4726	1.08339	11	3.06098	1.04854	14	7.46946	0.983523	14	7.32488	0.982098	11	5.75946	0.889232	14	12.6299	0.964914	14	11.3195	1.01401	11	7.31991	1.09876	14	4.218
Q9UBS4	DnaJ homolog subfamily B member 11 OS=Homo sapiens GN=DNAJB11 PE=1 SV=1 - [DJB11_HUMAN]	35.2	11	11	35	358	40.4886	6.17627	0.989237	11	10.3872	1.01456	10	9.15918	0.965057	14	8.32022	1.02544	11	18.9739	1.00519	10	7.99145	1.01216	14	4.26776	1.00076	11	6.99288	0.991762	10	9.99357	1.02559	14	8.07309	1.03044	11	13.372	1.02197	10	13.3414	0.949805	14	11.5564
Q9UPE4	Mitochondrial import inner membrane translocase subunit TIM44 OS=Homo sapiens GN=hTIM44 PE=2 SV=1 - [Q9UPE4_HUMAN]	35.18	13	13	46	415	47.3365	7.38623	0.971127	16	7.0351	1.01327	14	7.18336	1.02327	15	10.5713	1.11315	16	3.64663	1.04319	14	6.34007	1.02332	15	14.4111	0.965097	16	6.00569	0.986047	14	9.73714	0.999834	15	38.3301	1.03539	16	6.35599	0.968306	14	7.51546	1.03039	15	15.3274
Q15459	Splicing factor 3A subunit 1 OS=Homo sapiens GN=SF3A1 PE=1 SV=1 - [SF3A1_HUMAN]	35.18	24	24	115	793	88.8305	5.22412	0.99492	45	5.87392	0.997141	33	7.46599	0.93081	37	8.39713	0.973857	45	11.9183	1.01292	33	4.44661	1.04313	37	8.63828	1.03748	45	6.93369	0.976382	33	6.20953	0.980207	37	15.14	0.978161	45	12.1631	1.01046	33	8.61686	1.03795	37	10.4273
Q9UNX3	60S ribosomal protein L26-like 1 OS=Homo sapiens GN=RPL26L1 PE=1 SV=1 - [RL26L_HUMAN]	35.17	2	8	33	145	17.2456	10.5503	1.04776	2	3.40969				0.929588	1		0.930991	2	18.5167				1.04599	1		1.12764	2	4.04175				0.981085	1		0.822153	2	4.85045				1.02661	1
P61254	60S ribosomal protein L26 OS=Homo sapiens GN=RPL26 PE=1 SV=1 - [RL26_HUMAN]	35.17	2	8	48	145	17.2475	10.5503	1.09266	3	1.27883	1.08732	8	7.33287	0.989826	7	6.76302	0.925006	3	4.31764	0.865484	8	9.57946	0.984676	7	5.65434	1.07867	3	9.51104	1.23949	8	2.73467	1.09255	7	5.17043	0.83975	3	14.0795	0.873459	8	3.9571	0.984266	7	6.66369
B4DN54	cDNA FLJ55111, highly similar to Sorting and assembly machinery component 50 homolog OS=Homo sapiens PE=2 SV=1 - [B4DN54_HUMAN]	35.14	1	7	14	259	28.4634	8.54346	1.03797	2	2.32959	1.02977	1		0.991995	1		1.00439	2	7.80909	1.03761	1		1.04915	1		0.989071	2	1.664	0.956149	1		0.791163	1		0.970919	2	6.13812	0.978278	1		1.17013	1
Q63Z38	Putative uncharacterized protein DKFZp686P02188 (Fragment) OS=Homo sapiens GN=DKFZp686P02188 PE=2 SV=1 - [Q63Z38_HUMAN]	35.14	1	1	3	37	3.92877	4.08154	0.885624	1		0.98554	1		1.03513	1		1.09623	1		0.96863	1		0.975644	1		0.947598	1		1.01892	1		1.00585	1		1.1688	1		1.03015	1		0.995135	1
Q8WXV6	Plectin isoform 1a (Fragment) OS=Homo sapiens GN=PLEC1 PE=2 SV=1 - [Q8WXV6_HUMAN]	35.14	1	1	1	37	4.1432	9.99365							0.679777	1								0.950902	1								1.09165	1								1.27055	1
Q9UJU6	Drebrin-like protein OS=Homo sapiens GN=DBNL PE=1 SV=1 - [DBNL_HUMAN]	35.12	3	14	48	430	48.1776	5.04639	1.01624	4	6.60961	1.09616	4	5.90216	1.00094	5	17.3292	0.843182	4	9.30014	0.984571	4	9.21923	0.967985	5	8.8213	1.04988	4	5.82742	0.992332	4	4.8294	1.06534	5	0.48054	0.935339	4	3.76786	0.956626	4	5.71039	1.04695	5	13.691
B2R5I8	cDNA, FLJ92490, highly similar to Homo sapiens RAB32, member RAS oncogene family (RAB32), mRNA OS=Homo sapiens PE=2 SV=1 - [B2R5I8_HUMAN]	35.11	5	6	19	225	24.9407	6.68311	0.965014	6	4.16797	0.982121	5	3.08787	1.05641	4	1.60418	1.03581	6	10.5107	1.00008	5	4.68729	0.894548	4	4.33448	0.93915	6	4.96735	0.985722	5	7.68725	1.16581	4	16.7189	1.07443	6	6.42328	1.01613	5	5.24517	0.843159	4	10.055
P46060	Ran GTPase-activating protein 1 OS=Homo sapiens GN=RANGAP1 PE=1 SV=1 - [RAGP1_HUMAN]	35.09	19	19	68	587	63.5023	4.67822	1.08792	25	7.05175	1.03853	23	5.49625	1.08881	20	6.95037	0.889027	25	10.5203	1.00645	23	7.02018	0.98359	20	5.80601	1.08364	25	5.30814	0.972651	23	6.92654	0.982945	20	14.1243	0.854686	25	10.3472	0.965244	23	7.54826	0.940246	20	14.2772
P60903	Protein S100-A10 OS=Homo sapiens GN=S100A10 PE=1 SV=2 - [S10AA_HUMAN]	35.05	4	4	80	97	11.1955	7.37158	1.06383	31	10.4707	1.02377	18	7.47688	0.944401	22	9.05249	0.8987	31	25.0876	0.928119	18	13.1998	1.04254	22	19.4428	1.02905	31	16.1955	1.12004	18	16.2233	0.940566	22	21.9989	0.846673	31	23.8177	0.911896	18	12.1218	1.01747	22	5.69289
B4DDR3	cDNA FLJ52148, highly similar to Apoptosis inhibitor 5 OS=Homo sapiens PE=2 SV=1 - [B4DDR3_HUMAN]	35.05	1	12	53	331	37.4847	8.67529	1.01592	2	0.528958	0.884019	1		0.914739	1		0.957483	2	10.7854	1.06057	1		1.08189	1		1.00403	2	2.08617	0.930519	1		0.863087	1		1.0236	2	5.51345	1.13948	1		1.12052	1
K7ESH8	Ribonuclease P protein subunit p29 OS=Homo sapiens GN=POP4 PE=1 SV=1 - [K7ESH8_HUMAN]	35	1	1	3	40	4.52733	9.99365	1.0705	1		0.850295	1		0.759295	1		0.862074	1		1.00002	1		1.06396	1		1.08415	1		1.04935	1		1.0071	1		0.921349	1		1.11784	1		1.13471	1
E9PKZ9	Complex I assembly factor TMEM126B, mitochondrial OS=Homo sapiens GN=TMEM126B PE=1 SV=1 - [E9PKZ9_HUMAN]	35	1	1	1	40	4.40514	4.80518							1.06581	1								0.74591	1								1.24744	1								1.01376	1
A0A024R7U6	DNA helicase OS=Homo sapiens GN=MCM4 PE=3 SV=1 - [A0A024R7U6_HUMAN]	34.99	27	29	84	863	96.5156	6.7417	0.970284	31	13.6913	0.988566	27	6.70088	1.00624	21	8.25035	1.003	31	10.8279	1.00575	27	11.9434	0.982804	21	6.22871	1.03273	31	5.43667	1.02681	27	10.2871	1.05113	21	16.0793	0.982756	31	8.78032	0.988941	27	5.62355	0.9444	21	10.4753
P13010	X-ray repair cross-complementing protein 5 OS=Homo sapiens GN=XRCC5 PE=1 SV=3 - [XRCC5_HUMAN]	34.97	25	25	133	732	82.6523	5.80811	0.991066	49	10.3562	0.985244	45	10.4259	1.00934	39	8.30125	0.972153	49	17.9134	0.998123	45	7.51023	1.06504	39	11.771	1.01803	49	7.67561	1.06484	45	9.30856	0.897444	38	21.5899	0.989362	49	10.2693	0.970214	45	8.31423	1.02025	39	16.1457
B4DMF5	Glutamate dehydrogenase OS=Homo sapiens PE=2 SV=1 - [B4DMF5_HUMAN]	34.97	15	15	52	509	56.5676	7.21045	1.03256	17	6.79321	0.988308	17	8.47352	1.00888	18	10.1214	0.977303	17	12.1339	1.02058	17	8.04977	1.0291	18	4.39193	0.985197	17	7.37379	0.992863	17	4.94231	0.989583	18	8.53531	0.994567	17	10.3147	1.0014	17	5.40878	0.985761	18	6.8662
U3KQ07	Protein C10 OS=Homo sapiens GN=C12orf57 PE=1 SV=1 - [U3KQ07_HUMAN]	34.95	2	2	2	103	10.5362	5.10986	0.727167	1		1.16395	1					1.53353	1		0.876143	1					1.08871	1		1.18203	1					0.800815	1		0.765779	1
P13645	Keratin, type I cytoskeletal 10 OS=Homo sapiens GN=KRT10 PE=1 SV=6 - [K1C10_HUMAN]	34.93	13	17	84	584	58.7917	5.21143	1.10088	10	6.06305	0.991703	15	7.82507	0.852765	13	13.1487	1.01159	10	10.5197	1.0637	15	10.0366	1.10223	13	9.6971	0.870325	10	6.50017	1.1187	15	5.60086	1.14199	13	15.8873	1.03865	10	7.93434	0.854662	15	7.82839	0.8356	13	11.2959
Q9H0A0	RNA cytidine acetyltransferase OS=Homo sapiens GN=NAT10 PE=1 SV=2 - [NAT10_HUMAN]	34.93	15	30	91	1025	115.657	8.26514	1.0917	21	8.97739	1.07358	16	7.65353	0.912252	20	8.85007	0.905886	21	9.94674	0.952929	16	4.35565	1.0943	20	7.28733	1.13301	21	7.84877	1.0257	16	4.15091	0.836592	20	18.6469	0.866051	21	10.3513	0.961682	16	10.8868	1.08545	20	11.5855
A0A087WTS0	Glutathione peroxidase OS=Homo sapiens GN=GPX2 PE=1 SV=1 - [A0A087WTS0_HUMAN]	34.92	5	5	21	189	21.7902	7.78174	0.91582	10	12.7236	0.97156	4	1.92834	1.09867	7	4.81371	1.20781	10	5.24241	1.03377	4	2.48817	0.828154	7	10.0884	0.86457	10	7.65064	1.00187	4	5.66728	1.16784	7	12.256	1.15096	10	13.4334	1.00938	4	4.65605	0.894908	7	16.6913
Q8TAD7	Overexpressed in colon carcinoma 1 protein OS=Homo sapiens GN=OCC1 PE=1 SV=2 - [OCC1_HUMAN]	34.92	1	1	3	63	6.40305	6.56592	1.0323	1		1.43233	1		1.18323	1		1.04359	1		1.17751	1		0.920822	1		0.895285	1		0.765505	1		1.02437	1		1.07835	1		0.595352	1		0.909321	1
P04424	Argininosuccinate lyase OS=Homo sapiens GN=ASL PE=1 SV=4 - [ARLY_HUMAN]	34.91	14	14	44	464	51.6253	6.48096	0.962575	15	15.6456	1.00077	16	5.39738	0.937896	13	7.16034	0.975036	15	10.1748	1.05671	16	8.09658	1.07614	13	7.01767	1.02355	15	5.31263	0.962846	16	8.1062	1.03094	13	13.8688	1.02757	15	15.3722	0.983945	16	3.4199	0.987047	13	1.50453
Q9UBQ5	Eukaryotic translation initiation factor 3 subunit K OS=Homo sapiens GN=EIF3K PE=1 SV=1 - [EIF3K_HUMAN]	34.86	6	6	25	218	25.0434	4.93213	1.07249	9	4.51876	0.964968	9	4.67501	1.00643	7	7.08125	0.891303	9	14.2663	0.97667	9	7.66665	1.07475	7	4.31392	1.06928	9	6.09276	1.00536	9	10.5886	0.906344	7	6.37903	0.913212	9	5.5791	1.03844	9	6.62942	0.941066	7	12.6937
Q16576	Histone-binding protein RBBP7 OS=Homo sapiens GN=RBBP7 PE=1 SV=1 - [RBBP7_HUMAN]	34.82	8	14	52	425	47.7902	5.04639	1.0482	6	4.46197	0.987448	8	3.13071	1.0227	5	16.1805	0.961174	6	7.41316	0.98651	8	5.46063	0.860846	5	4.77181	1.03106	6	7.74658	1.07971	8	7.66308	1.19117	5	4.67768	0.952799	6	11.4507	0.957129	8	6.9861	0.883085	5	5.05322
Q16531	DNA damage-binding protein 1 OS=Homo sapiens GN=DDB1 PE=1 SV=1 - [DDB1_HUMAN]	34.82	35	35	141	1140	126.887	5.26221	1.07646	56	8.9061	0.996862	42	8.62683	1.00429	43	8.43258	0.889994	56	9.15907	1.0365	42	8.35756	1.05776	43	9.1744	1.04418	56	6.40601	0.994062	42	8.85613	0.916117	43	17.7854	0.901326	56	9.08457	0.967528	42	8.40349	1.03205	43	11.4882
Q8N5N7	39S ribosomal protein L50, mitochondrial OS=Homo sapiens GN=MRPL50 PE=1 SV=2 - [RM50_HUMAN]	34.81	4	4	9	158	18.3134	7.88428	1.07113	3	4.43918	0.93194	2	11.3553	0.894885	4	12.6707	1.00252	3	4.1623	1.02401	2	0.941166	1.07343	4	3.23381	0.991076	3	2.13091	0.985527	2	0.318337	0.899819	4	4.59507	0.918178	3	3.72664	1.06314	2	10.2155	1.04716	4	17.2681
Q9NX63	MICOS complex subunit MIC19 OS=Homo sapiens GN=CHCHD3 PE=1 SV=1 - [MIC19_HUMAN]	34.8	7	7	21	227	26.1362	8.27979	1.02661	8	6.96792	1.00712	5	7.00461	0.940199	8	10.0895	0.995569	8	7.25697	1.11365	5	5.36776	1.01053	8	4.35581	1.07512	8	3.25596	0.934932	5	1.18819	1.11305	8	9.25258	0.966978	8	2.69171	1.004	5	3.71656	0.914548	8	11.0402
Q9NV31	U3 small nucleolar ribonucleoprotein protein IMP3 OS=Homo sapiens GN=IMP3 PE=1 SV=1 - [IMP3_HUMAN]	34.78	5	5	13	184	21.8366	9.49561	1.10295	5	3.05366	1.19956	4	3.70031	1.05674	4	12.846	0.784956	5	7.38566	0.792925	4	4.32254	1.10979	4	5.13973	1.20585	5	3.19012	1.14692	4	3.77101	0.67337	4	31.2701	0.787655	5	10.2422	0.859929	4	8.5377	1.21406	4	5.7853
O43768	Alpha-endosulfine OS=Homo sapiens GN=ENSA PE=1 SV=1 - [ENSA_HUMAN]	34.71	3	4	22	121	13.3808	7.23975	0.974227	5	3.30258	0.943936	7	6.17513	1.03339	4	5.87136	1.12704	5	10.065	1.08972	7	4.64723	0.926627	4	5.35651	0.934941	5	6.16998	0.936734	7	6.54734	1.10132	4	3.57667	1.06777	5	9.88979	1.07046	7	4.10805	0.957439	4	4.57058
I3L3T4	TOM1-like protein 1 OS=Homo sapiens GN=TOM1L1 PE=1 SV=1 - [I3L3T4_HUMAN]	34.67	6	7	7	225	25.2372	7.35693	1.08889	2	2.90653	1.06927	1		1.14596	2	6.33448	0.896445	2	10.7088	0.996316	1		0.895622	2	14.6352	0.998879	2	6.04351	1.01606	1		1.07456	2	21.928	0.979908	2	4.47846	0.916241	1		0.899187	2	16.3437
K7EJE8	Lon protease homolog, mitochondrial OS=Homo sapiens GN=LONP1 PE=1 SV=1 - [K7EJE8_HUMAN]	34.62	27	27	88	829	93.238	6.49365	1.02984	24	5.88943	1.04226	31	6.18979	0.957884	33	8.43427	0.955059	24	10.5083	0.96627	31	5.85951	1.07591	33	8.08674	1.04388	24	7.68338	0.99698	31	6.80721	0.876246	33	18.6276	0.957655	24	11.9654	0.981563	31	6.70286	1.05272	33	11.6545
Q14165	Malectin OS=Homo sapiens GN=MLEC PE=1 SV=1 - [MLEC_HUMAN]	34.59	10	10	40	292	32.2136	5.41455	0.953474	12	5.85504	0.991541	14	7.21802	1.12829	14	11.7182	1.05503	12	14.3113	1.01251	14	5.20522	0.913101	14	10.1644	0.888447	12	6.3244	0.974366	14	3.50533	1.19472	14	10.9282	1.19153	12	9.20712	1.03124	14	5.77221	0.787135	14	12.2922
A0A087WY71	AP-2 complex subunit mu OS=Homo sapiens GN=AP2M1 PE=1 SV=1 - [A0A087WY71_HUMAN]	34.56	15	15	34	434	49.495	9.53955	1.00147	11	10.6102	0.977498	14	5.3525	1.04059	9	6.23887	1.03348	11	4.13093	1.00312	14	7.08726	0.941244	9	6.28481	0.975617	11	5.07386	1.03083	14	9.36035	1.02895	9	30.7299	0.999333	11	8.67616	1.02853	14	4.77855	0.954845	9	15.0579
B4DDF4	Calponin OS=Homo sapiens GN=CNN2 PE=1 SV=1 - [B4DDF4_HUMAN]	34.56	7	8	22	298	32.5956	6.97607	0.988261	6	6.15338	1.07451	10	7.48856	1.08677	4	2.46388	0.992389	6	6.80939	1.00241	10	6.76783	1.00312	4	7.64676	0.996167	6	5.62906	1.00706	10	14.1369	1.08112	4	1.65103	0.958904	6	11.4734	0.936452	10	8.00083	0.88087	4	1.55931
Q96CT7	Coiled-coil domain-containing protein 124 OS=Homo sapiens GN=CCDC124 PE=1 SV=1 - [CC124_HUMAN]	34.53	8	8	21	223	25.8196	9.53955	1.06936	8	4.29317	0.976352	6	12.5999	0.929949	7	2.60327	0.915389	8	7.30239	0.954648	6	5.52053	0.99407	7	5.3436	1.02374	8	3.58878	1.01383	6	4.96007	1.0766	7	11.1416	0.963738	8	5.2649	1.05692	6	6.97732	0.997908	7	5.33866
Q9Y490	Talin-1 OS=Homo sapiens GN=TLN1 PE=1 SV=3 - [TLN1_HUMAN]	34.51	59	69	180	2541	269.599	6.07471	0.977246	55	7.76778	0.999937	53	5.42488	1.01095	54	9.09069	1.00613	55	12.159	0.976299	53	7.50158	0.994277	54	6.05679	0.982161	55	7.0564	1.0259	53	7.68673	1.00088	54	16.8595	1.02241	55	8.85504	1.01233	53	6.75365	1.00629	54	10.2728
E9PJ81	UBX domain-containing protein 1 (Fragment) OS=Homo sapiens GN=UBXN1 PE=1 SV=1 - [E9PJ81_HUMAN]	34.48	9	9	23	290	32.5916	5.13525	1.03863	9	6.34389	0.942509	7	8.18902	0.959484	7	8.53742	0.964331	9	8.55852	1.0702	7	9.70168	1.03529	7	5.06392	1.01832	9	3.10042	0.971851	7	1.56736	1.04647	7	10.5915	1.00853	9	9.32288	1.0503	7	5.01904	0.988909	7	4.95083
P53004	Biliverdin reductase A OS=Homo sapiens GN=BLVRA PE=1 SV=2 - [BIEA_HUMAN]	34.46	11	11	40	296	33.4073	6.44287	0.974992	13	6.76189	1.00412	12	3.50564	0.958745	15	4.74259	0.993651	13	13.4371	1.01086	12	4.96721	1.07977	15	8.75396	1.0574	13	4.18182	0.998236	12	5.62901	0.841822	15	17.9559	1.05333	13	8.8882	0.991895	12	3.73363	1.0763	15	10.2246
P13674	Prolyl 4-hydroxylase subunit alpha-1 OS=Homo sapiens GN=P4HA1 PE=1 SV=2 - [P4HA1_HUMAN]	34.46	1	16	42	534	61.011	6.01123	1.05778	2	4.64035	1.151	2	19.9893	1.20185	1		1.04034	2	3.23262	0.879673	2	20.8746	0.95065	1		0.953112	2	1.51063	0.976709	2	7.13908	0.93208	1		0.960791	2	6.32863	0.954817	2	0.982259	0.951869	1
Q6ICS0	Annexin (Fragment) OS=Homo sapiens GN=ANXA11 PE=2 SV=1 - [Q6ICS0_HUMAN]	34.46	1	15	79	505	54.302	7.26904				1.04816	1		1.16165	1					1.04858	1		0.961058	1					1.004	1		1.00928	1					0.9018	1		0.891728	1
Q9Y221	60S ribosome subunit biogenesis protein NIP7 homolog OS=Homo sapiens GN=NIP7 PE=1 SV=1 - [NIP7_HUMAN]	34.44	5	5	15	180	20.4495	8.51416	0.999418	8	7.06012	0.926311	4	2.61828	0.990346	3	11.5668	0.935945	8	12.9722	1.05139	4	2.37685	1.08133	3	3.74841	1.11435	8	5.89695	1.00742	4	1.11439	0.633231	3	8.42071	0.981258	8	8.8684	0.984048	4	3.85853	1.13416	3	7.89851
E9PRZ9	Small acidic protein (Fragment) OS=Homo sapiens GN=C11orf58 PE=1 SV=1 - [E9PRZ9_HUMAN]	34.44	3	3	8	90	10.0317	5.94775	1.05139	3	2.329	0.976993	3	3.80656	0.909441	2	4.56858	1.03172	3	5.28052	1.08298	3	4.1208	1.05788	2	0.0174766	0.994333	3	1.93565	0.965462	3	1.68981	0.988025	2	0.0958548	0.927552	3	0.437757	0.98216	3	1.67572	1.02124	2	3.9154
P62879	Guanine nucleotide-binding protein G(I)/G(S)/G(T) subunit beta-2 OS=Homo sapiens GN=GNB2 PE=1 SV=3 - [GBB2_HUMAN]	34.41	4	10	39	340	37.3071	5.99854	1.01314	5	1.98392	1.08475	3	0.21103	0.953665	2	2.86063	1.02146	5	1.33968	1.07983	3	2.94036	1.03435	2	13.0015	1.00366	5	0.970503	0.935493	3	0.230358	0.910231	2	2.22894	0.953293	5	5.46312	0.969663	3	11.2347	1.0874	2	12.3001
Q53F35	Acidic (Leucine-rich) nuclear phosphoprotein 32 family, member B variant (Fragment) OS=Homo sapiens PE=2 SV=1 - [Q53F35_HUMAN]	34.4	5	11	96	250	28.6553	4.05615	1.04438	20	5.23495	0.937252	12	4.08449	0.922457	12	8.38734	0.991572	20	5.4192	1.00972	12	3.93089	1.10675	12	4.70801	0.999103	20	4.94743	1.0164	12	2.17806	0.814731	12	23.3604	0.941008	20	6.2718	1.04412	12	6.41956	1.15822	12	10.9225
Q9Y2S6	Translation machinery-associated protein 7 OS=Homo sapiens GN=TMA7 PE=1 SV=1 - [TMA7_HUMAN]	34.38	2	3	20	64	7.06193	9.99365	1.04833	3	2.68662	1.05673	4	11.0136	0.958216	2	10.9382	0.878681	3	1.16527	0.991247	4	3.87405	0.926602	2	1.53661	1.03823	3	1.29481	0.959202	4	7.08386	1.18412	2	6.93059	0.988225	3	1.73788	0.994301	4	3.93537	0.936049	2	1.04414
Q53GJ1	DEAD (Asp-Glu-Ala-Asp) box polypeptide 47 isoform 1 variant (Fragment) OS=Homo sapiens PE=2 SV=1 - [Q53GJ1_HUMAN]	34.38	13	13	40	448	49.8504	9.24658	1.07404	13	3.95309	1.06881	14	7.34331	1.01805	13	4.72659	0.87032	13	12.903	0.883389	14	6.94577	1.04035	13	7.00797	1.08504	13	7.07651	1.06047	14	4.01508	0.839463	13	31.1717	0.827193	13	6.87004	0.929335	14	8.8036	1.17058	13	13.8463
Q00688	Peptidyl-prolyl cis-trans isomerase FKBP3 OS=Homo sapiens GN=FKBP3 PE=1 SV=1 - [FKBP3_HUMAN]	34.38	7	7	40	224	25.1613	9.27588	0.940253	11	4.81263	0.971677	15	5.9873	1.02054	14	11.2502	0.984135	11	8.64067	1.02695	15	6.26585	0.974453	14	12.9274	1.03969	11	6.63666	1.07171	15	1.56873	1.07391	14	10.6253	1.04321	11	8.15698	1.00537	15	2.39343	0.941594	14	11.3387
M0QXH0	Thioredoxin, mitochondrial OS=Homo sapiens GN=TXN2 PE=1 SV=1 - [M0QXH0_HUMAN]	34.38	2	2	2	64	7.02269	5.08447	0.897229	1		1.08558	1					1.03557	1		0.892983	1					0.995107	1		1.09301	1					1.14007	1		0.921008	1
E7EUU4	Eukaryotic translation initiation factor 4 gamma 1 OS=Homo sapiens GN=EIF4G1 PE=1 SV=1 - [E7EUU4_HUMAN]	34.36	46	53	254	1560	171.535	5.31299	1.00662	97	8.93288	0.988998	63	7.53001	0.997812	57	10.2391	0.972474	97	11.8074	1.03136	63	7.50364	1.01075	57	8.30747	1.01973	97	8.35039	1.00337	63	8.65847	1.02908	57	17.4649	0.996629	97	14.7271	0.981687	63	7.87851	0.973482	57	8.59562
Q9Y3C6	Peptidyl-prolyl cis-trans isomerase-like 1 OS=Homo sapiens GN=PPIL1 PE=1 SV=1 - [PPIL1_HUMAN]	34.34	5	5	15	166	18.2251	7.98682	1.04196	4	1.84308	1.02401	6	7.57597	0.906598	5	2.03794	0.965093	4	2.10533	1.04965	6	3.93317	1.07157	5	5.30618	1.06017	4	4.40388	0.995169	6	8.0373	0.937811	5	4.93122	0.893224	4	5.5061	0.99845	6	2.67322	1.02051	5	3.20734
H7C608	Geminin (Fragment) OS=Homo sapiens GN=GMNN PE=1 SV=1 - [H7C608_HUMAN]	34.31	2	2	2	102	11.3628	9.34912							1.06867	2	23.3636							0.839257	2	11.5676							1.15154	2	10.0704							0.958423	2	24.079
A0A024R895	SET translocation (Myeloid leukemia-associated), isoform CRA_b OS=Homo sapiens GN=SET PE=3 SV=1 - [A0A024R895_HUMAN]	34.3	1	8	53	277	32.0837	4.22119				1.16243	1		0.814696	1					0.914685	1		0.859447	1					0.873226	1		0.808873	1					1.02996	1		1.57455	1
Q5JRI1	Serine/arginine-rich-splicing factor 10 OS=Homo sapiens GN=SRSF10 PE=1 SV=1 - [Q5JRI1_HUMAN]	34.3	6	6	23	172	20.9005	10.4771	1.02497	9	3.02374	0.980386	7	3.55141	0.931236	7	12.464	0.944115	9	3.05086	0.900525	7	14.1573	1.04466	7	5.04341	0.984887	9	8.02613	1.03138	7	8.27425	0.973273	7	12.0973	1.00311	9	4.56136	1.0636	7	8.53569	1.07485	7	15.481
Q99747	Gamma-soluble NSF attachment protein OS=Homo sapiens GN=NAPG PE=1 SV=1 - [SNAG_HUMAN]	34.29	10	10	21	312	34.7243	5.41455	1.02751	7	6.12494	0.960846	9	5.63394	1.02394	5	4.6254	1.0347	7	23.2943	0.980907	9	5.04426	0.955783	5	10.4181	0.966211	7	8.42211	1.03567	9	5.63858	1.03606	5	17.8951	0.981244	7	5.14515	1.03985	9	6.39393	0.961769	5	7.61934
B2RCM2	cDNA, FLJ96156, highly similar to Homo sapiens leucyl-tRNA synthetase (LARS), mRNA OS=Homo sapiens PE=2 SV=1 - [B2RCM2_HUMAN]	34.27	37	37	115	1176	134.352	7.1958	0.991381	39	7.72566	0.991308	35	9.23862	0.979136	41	15.3443	0.990075	39	9.58398	1.00116	35	7.41661	1.06755	41	9.60416	1.03983	39	7.32947	1.0036	35	6.40733	0.911387	41	23.0977	0.971329	39	10.7735	1.02139	35	6.28653	1.00482	41	13.1463
Q9NZ45	CDGSH iron-sulfur domain-containing protein 1 OS=Homo sapiens GN=CISD1 PE=1 SV=1 - [CISD1_HUMAN]	34.26	3	3	12	108	12.1912	9.08545	1.06378	6	4.40651	0.999373	2	3.64405	0.850973	4	8.73488	0.899901	6	9.0294	1.03475	2	0.92937	1.11263	4	8.93787	1.1023	6	7.10479	1.01039	2	6.85471	0.875735	4	21.4848	0.850904	6	6.499	0.959742	2	3.8032	1.12377	4	11.9256
I3L397	Eukaryotic translation initiation factor 5A (Fragment) OS=Homo sapiens GN=EIF5A PE=1 SV=8 - [I3L397_HUMAN]	34.25	6	6	61	146	16.0089	4.99561	1.05757	17	9.62945	1.00176	19	5.70223	0.868539	25	17.4011	0.932203	17	5.76686	1.01089	19	7.44514	1.09271	25	13.078	1.09408	17	6.40387	0.992534	19	9.96696	0.776834	25	20.3581	0.850779	17	13.1145	0.991013	19	13.1295	1.11909	25	16.0001
B7Z5J7	cDNA FLJ58682, highly similar to Vesicle-fusing ATPase (EC 3.6.4.6) OS=Homo sapiens PE=2 SV=1 - [B7Z5J7_HUMAN]	34.24	22	23	79	739	82.0059	6.81494	0.978431	33	7.10869	0.990586	16	9.22561	1.00648	28	8.73353	1.08609	33	11.2017	1.00868	16	9.69733	1.00854	28	6.85332	0.955397	33	7.81856	0.999354	16	9.93233	1.03616	28	13.6016	1.01351	33	11.2963	1.00057	16	10.0621	0.984468	28	16.1164
Q9Y3D9	28S ribosomal protein S23, mitochondrial OS=Homo sapiens GN=MRPS23 PE=1 SV=2 - [RT23_HUMAN]	34.21	6	6	16	190	21.7573	8.89502	1.07029	6	4.53653	0.987531	4	6.10298	1.03411	6	4.7809	0.961674	6	9.15327	1.04442	4	6.93914	1.01273	6	8.76398	1.02047	6	5.42961	0.96682	4	3.34716	0.946911	6	16.8657	0.901485	6	5.75398	1.01261	4	1.33779	1.02727	6	6.40548
Q96C23	Aldose 1-epimerase OS=Homo sapiens GN=GALM PE=1 SV=1 - [GALM_HUMAN]	34.21	9	9	19	342	37.7421	6.65381	0.948311	10	9.56361	0.989422	4	2.4398	0.952986	5	1.66246	1.03507	10	9.41612	0.927379	4	14.266	0.986816	5	11.7751	0.963886	10	7.1342	1.07248	4	2.3608	1.10108	5	25.212	1.01305	10	19.5035	0.993381	4	22.1412	1.01143	5	20.0245
B3KUB6	cDNA FLJ39529 fis, clone PUAEN2004067, highly similar to Band 4.1-like protein 1 OS=Homo sapiens PE=2 SV=1 - [B3KUB6_HUMAN]	34.2	0	22	61	772	86.4204	5.80811
Q8NBY1	Serine/threonine-protein kinase 26 OS=Homo sapiens GN=STK26 PE=1 SV=1 - [Q8NBY1_HUMAN]	34.18	7	13	44	392	43.8403	5.41455	1.04442	4	3.67431	0.957975	8	7.74287	0.927166	8	12.2994	0.955781	4	6.31511	0.980258	8	8.99701	1.03495	8	6.72156	1.04612	4	2.16013	1.06012	8	10.3854	1.0241	8	6.42154	0.944879	4	1.83593	1.01313	8	7.10645	1.02161	8	11.0743
A6XGP7	Reticulon OS=Homo sapiens GN=NOGOC PE=2 SV=1 - [A6XGP7_HUMAN]	34.17	1	6	28	199	22.2382	9.17334							1.12592	1								1.15867	1								0.532998	1								1.17669	1
B4E2B5	MICOS complex subunit MIC60 OS=Homo sapiens PE=2 SV=1 - [B4E2B5_HUMAN]	34.16	1	14	48	404	43.1939	9.20264	1.13102	1		1.05726	1					0.854945	1		0.993842	1					1.09105	1		0.959231	1					0.830498	1		0.98654	1
P60228	Eukaryotic translation initiation factor 3 subunit E OS=Homo sapiens GN=EIF3E PE=1 SV=1 - [EIF3E_HUMAN]	34.16	15	15	66	445	52.1874	6.03662	1.04403	27	9.34971	0.91332	21	13.2294	0.966929	18	5.94417	0.918242	27	16.4094	1.0309	21	5.74699	1.0322	18	12.1025	1.06175	27	5.29421	0.989615	21	8.34204	0.948134	18	24.9008	0.927388	27	6.79249	1.03144	21	9.06163	0.99939	18	13.0906
Q9Y5U9	Immediate early response 3-interacting protein 1 OS=Homo sapiens GN=IER3IP1 PE=1 SV=1 - [IR3IP_HUMAN]	34.15	2	2	7	82	8.96294	8.22119	0.993582	3	3.2517	0.971186	3	0.594486	1.16764	1		1.09433	3	3.12697	1.05782	3	2.95575	0.940043	1		0.93399	3	3.0418	0.954538	3	0.704362	0.953981	1		1.03352	3	5.18569	1.00786	3	0.508692	0.974647	1
Q16543	Hsp90 co-chaperone Cdc37 OS=Homo sapiens GN=CDC37 PE=1 SV=1 - [CDC37_HUMAN]	34.13	11	11	58	378	44.44	5.24951	0.978524	19	7.88661	1.00461	15	6.98949	0.985756	24	8.48661	1.05322	19	8.33471	1.04345	15	13.0195	0.969701	24	9.309	1.00123	19	6.26239	0.952486	15	3.85501	1.08739	24	10.4679	1.0131	19	6.16578	1.02017	15	5.15686	0.93883	24	13.6169
Q13868	Exosome complex component RRP4 OS=Homo sapiens GN=EXOSC2 PE=1 SV=2 - [EXOS2_HUMAN]	34.13	7	7	20	293	32.7681	7.50342	1.03382	6	4.91568	1.05395	7	6.53381	0.966494	7	13.0007	0.970958	6	13.1542	0.989897	7	8.16312	1.05697	7	9.05509	0.999032	6	2.4864	1.00536	7	6.01381	0.863869	7	7.04568	0.961248	6	6.33237	0.968032	7	4.89389	1.07481	7	3.32112
B2R6K4	cDNA, FLJ92996, highly similar to Homo sapiens guanine nucleotide binding protein (G protein), beta polypeptide 1 (GNB1), mRNA OS=Homo sapiens PE=2 SV=1 - [B2R6K4_HUMAN]	34.12	3	9	37	340	37.277	6.17627	1.01569	3	0.801865	1.07982	3	2.41104	1.10134	2	1.28924	1.05009	3	2.73758	1.00677	3	1.61034	0.919848	2	3.53809	0.97939	3	1.64263	0.978115	3	7.48006	1.00335	2	14.2299	0.988919	3	1.70426	1.00434	3	0.525356	1.00191	2	12.4353
P63313	Thymosin beta-10 OS=Homo sapiens GN=TMSB10 PE=1 SV=2 - [TYB10_HUMAN]	34.09	3	3	20	44	5.02255	5.36377	1.08922	8	10.8882	1.05473	6	8.60807	0.880445	6	7.34727	0.926223	8	14.9234	1.02945	6	5.79298	0.994203	6	6.14527	0.994812	8	9.10525	0.967335	6	2.49778	1.09271	6	3.58308	0.859818	8	22.4343	0.989038	6	4.94772	1.02822	6	5.29001
Q13435	Splicing factor 3B subunit 2 OS=Homo sapiens GN=SF3B2 PE=1 SV=2 - [SF3B2_HUMAN]	34.08	28	28	115	895	100.165	5.66846	1.05722	35	5.95535	1.01515	39	7.71123	0.999412	41	10.8901	0.954985	35	12.7376	1.0292	39	7.05228	0.996551	41	12.1849	1.0306	35	8.99429	0.998589	39	11.3623	0.992054	41	12.2731	0.936535	35	13.6037	0.965826	39	7.35089	1.01967	41	9.77399
B2RBE5	cDNA, FLJ95468, highly similar to Homo sapiens transcriptional coactivator tubedown-100 (TBDN100),transcript variant 1, mRNA OS=Homo sapiens PE=2 SV=1 - [B2RBE5_HUMAN]	34.06	23	29	85	866	101.236	7.41553	1.0156	25	9.57012	0.970993	20	8.15842	0.933003	21	10.4353	0.957021	25	7.61091	0.977905	20	7.51074	1.06022	21	8.12991	1.04994	25	9.2225	1.01711	20	7.42549	0.966809	21	17.0943	0.982701	25	9.53116	1.01244	20	7.21954	1.05646	21	8.55685
Q9UNZ2	NSFL1 cofactor p47 OS=Homo sapiens GN=NSFL1C PE=1 SV=2 - [NSF1C_HUMAN]	34.05	1	9	26	370	40.5483	5.09717				1.00044	1								1.22735	1								0.83957	1								0.94496	1
Q53FE8	cDNA FLJ36526 fis, clone TRACH2003347, highly similar to NSFL1 cofactor p47 (Fragment) OS=Homo sapiens PE=2 SV=1 - [Q53FE8_HUMAN]	34.05	1	9	28	370	40.5473	5.13525	1.06125	1		1.14504	1		0.930428	1		0.848337	1		1.1284	1		1.11542	1		1.13865	1		0.877383	1		0.968402	1		0.870217	1		0.844473	1		0.945793	1
A8K3Y5	cDNA FLJ78186 OS=Homo sapiens PE=2 SV=1 - [A8K3Y5_HUMAN]	34.04	12	12	28	379	43.5959	9.56885	1.02295	13	9.2952	0.974484	6	6.88939	0.843704	9	11.2271	0.956539	13	9.90268	1.00141	6	7.39847	1.08395	9	7.87251	1.04567	13	8.25913	0.996802	6	5.90471	0.977447	9	4.50102	0.995994	13	13.7714	0.976369	6	1.29807	1.03621	9	1.72162
Q15393	Splicing factor 3B subunit 3 OS=Homo sapiens GN=SF3B3 PE=1 SV=4 - [SF3B3_HUMAN]	34.02	35	35	120	1217	135.492	5.26221	1.04849	40	8.43153	0.982566	40	7.12799	1.0053	40	8.02666	0.943558	40	11.9878	1.02254	40	6.27006	1.02076	40	8.84776	1.00704	40	8.46363	0.999001	40	4.93979	1.05046	40	17.3933	0.999666	40	9.10085	0.994079	40	8.24011	0.9561	40	16.701
P51648	Fatty aldehyde dehydrogenase OS=Homo sapiens GN=ALDH3A2 PE=1 SV=1 - [AL3A2_HUMAN]	34.02	16	17	78	485	54.8129	7.88428	0.928807	26	7.45851	0.995698	24	6.81107	1.07843	23	9.96316	1.0952	26	10.5741	0.984241	24	7.07743	0.896879	23	9.74636	0.966614	26	10.6381	1.05278	24	12.0974	1.10354	23	21.7391	1.04645	26	10.365	0.987733	24	12.836	0.897073	23	14.4606
O60220	Mitochondrial import inner membrane translocase subunit Tim8 A OS=Homo sapiens GN=TIMM8A PE=1 SV=1 - [TIM8A_HUMAN]	34.02	3	3	8	97	10.9913	5.16064	0.808722	2	13.6509	0.958353	2	3.81894	1.10866	4	10.444	1.1979	2	13.9361	0.987472	2	9.60018	0.958376	4	16.0114	0.8599	2	4.79916	1.0399	2	5.69356	1.0576	4	20.4979	1.30042	2	5.08991	1.01863	2	0.801204	0.890397	4	5.98711
A0A087WYV4	Dehydrogenase/reductase SDR family member 11 OS=Homo sapiens GN=DHRS11 PE=1 SV=1 - [A0A087WYV4_HUMAN]	34	1	1	2	50	5.19176	11.3267	0.968542	1		0.875868	1					1.05037	1		0.678319	1					0.960618	1		0.921155	1					1.07213	1		1.51565	1
Q6IB68	MYCBP protein OS=Homo sapiens GN=MYCBP PE=2 SV=1 - [Q6IB68_HUMAN]	33.98	3	3	9	103	11.9453	5.90967	0.963981	3	0.55986	0.989659	2	4.5535	0.974329	4	10.6214	1.07981	3	3.64946	0.859157	2	8.86653	0.947323	4	13.0893	0.985692	3	9.11297	1.14761	2	2.28118	1.17431	4	11.715	1.07491	3	0.907064	0.999721	2	9.49725	0.906523	4	15.1452
K7EL20	Eukaryotic translation initiation factor 3 subunit G (Fragment) OS=Homo sapiens GN=EIF3G PE=1 SV=8 - [K7EL20_HUMAN]	33.97	1	8	20	262	29.2647	5.41455	1.05996	1		0.918537	1		1.07219	1		0.916279	1		1.08596	1		1.01554	1		1.04744	1		0.913793	1		0.959614	1		0.939142	1		1.09445	1		0.956559	1
Q5VWC4	26S proteasome non-ATPase regulatory subunit 4 OS=Homo sapiens GN=PSMD4 PE=1 SV=1 - [Q5VWC4_HUMAN]	33.95	10	10	34	380	41.0534	4.80518	1.01303	9	4.27634	0.968509	10	1.79248	0.867086	15	6.08527	0.885948	9	5.08733	0.972357	10	7.58693	1.06673	15	15.0525	1.07867	9	8.2137	1.03375	10	4.79094	1.00915	15	5.24274	0.954338	9	9.56681	1.0097	10	3.47074	1.04542	15	9.20682
P05161	Ubiquitin-like protein ISG15 OS=Homo sapiens GN=ISG15 PE=1 SV=5 - [ISG15_HUMAN]	33.94	5	5	12	165	17.8763	7.44482	0.978488	4	7.29716	0.964941	4	8.0107	0.904135	4	3.07046	1.10045	4	4.51	1.05011	4	7.86834	0.987593	4	4.80058	0.946689	4	10.504	0.967716	4	3.13085	1.08864	4	8.73669	1.06757	4	3.78433	1.00907	4	10.3153	1.02734	4	12.7779
Q8NBL6	cDNA PSEC0127 fis, clone PLACE1003724, highly similar to Mitochondrial 28S ribosomal protein S22 OS=Homo sapiens PE=2 SV=1 - [Q8NBL6_HUMAN]	33.94	7	7	14	218	25.1233	9.45166	1.02092	9	9.50999	1.04987	1		0.903872	4	7.59743	1.05797	9	19.1337	0.925907	1		1.11596	4	4.53434	1.01188	9	6.82691	1.0974	1		0.838466	4	12.8837	0.922991	9	6.73538	0.924602	1		1.11537	4	7.44237
H3BRW3	FAD-linked sulfhydryl oxidase ALR OS=Homo sapiens GN=GFER PE=1 SV=1 - [H3BRW3_HUMAN]	33.94	2	2	3	109	11.6527	9.96436				0.958097	1		0.916194	2	19.2919				1.24357	1		0.996115	2	4.63214				1.00171	1		1.12894	2	3.78327				0.818828	1		0.936714	2	6.08135
O95831	Apoptosis-inducing factor 1, mitochondrial OS=Homo sapiens GN=AIFM1 PE=1 SV=1 - [AIFM1_HUMAN]	33.93	16	16	55	613	66.8589	8.95361	0.984912	16	7.05283	0.972319	22	7.68027	0.980344	17	6.14879	1.01924	16	6.73934	1.04652	22	4.28622	1.00491	17	5.33043	0.985038	16	6.28754	0.972756	22	6.78383	1.11839	17	8.03188	1.03585	16	8.54342	1.00387	22	5.37412	0.964499	17	6.17004
Q9UMS4	Pre-mRNA-processing factor 19 OS=Homo sapiens GN=PRPF19 PE=1 SV=1 - [PRP19_HUMAN]	33.93	11	11	39	504	55.1463	6.60986	1.04553	14	7.96509	0.985806	13	9.0779	0.952839	12	7.37554	0.982929	14	4.33592	1.014	13	8.72672	1.02804	12	5.61295	1.01878	14	8.05469	1.0027	13	7.15495	0.965822	12	13.2269	0.867355	14	7.09316	0.997505	13	5.80736	1.07267	12	17.6054
A8K4T6	cDNA FLJ76282, highly similar to Homo sapiens proteasome (prosome, macropain) 26S subunit, non-ATPase, 5 (PSMD5), mRNA OS=Homo sapiens PE=2 SV=1 - [A8K4T6_HUMAN]	33.93	13	13	40	504	56.1884	5.56689	1.00308	15	4.86364	0.988099	13	7.31763	0.969871	12	9.17873	1.08621	15	6.48468	1.00744	13	7.39449	0.995804	12	9.30817	1.00011	15	6.21235	0.999516	13	9.48689	0.929569	12	20.0392	0.970373	15	11.9014	0.971685	13	12.4521	1.11769	12	18.7186
Q7Z7H5	Transmembrane emp24 domain-containing protein 4 OS=Homo sapiens GN=TMED4 PE=1 SV=1 - [TMED4_HUMAN]	33.92	5	7	27	227	25.9263	8.27979	0.912418	7	11.4167	0.94759	8	3.40061	0.938235	7	5.86981	1.00234	7	7.9921	1.00364	8	4.97	1.00719	7	3.59175	0.990112	7	9.33668	1.01124	8	6.06258	1.1077	7	8.79324	1.07532	7	11.0856	1.04707	8	4.44355	0.906825	7	3.31228
P00390	Glutathione reductase, mitochondrial OS=Homo sapiens GN=GSR PE=1 SV=2 - [GSHR_HUMAN]	33.91	13	13	54	522	56.221	8.49951	0.940983	14	4.86025	0.92144	18	8.0376	0.946868	22	10.6132	1.06494	14	4.3283	1.00437	18	5.87778	1.0074	22	6.71744	1.01389	14	6.58075	1.01236	18	6.70784	1.01979	22	7.89199	1.06312	14	9.70105	1.04208	18	5.63218	0.998372	22	9.83847
A8K492	cDNA FLJ76789, highly similar to Homo sapiens methionine-tRNA synthetase (MARS), mRNA OS=Homo sapiens PE=2 SV=1 - [A8K492_HUMAN]	33.89	23	23	103	900	101.08	6.16357	1.00739	36	7.86757	1.00588	33	8.2973	0.926615	34	12.5311	0.94126	36	14.6588	0.973411	33	7.80833	1.13783	34	9.09852	1.04194	36	5.54469	1.02083	33	7.37704	0.835502	34	21.7334	0.969664	36	13.5646	1.00092	33	9.46273	1.10531	34	12.0404
F5GZS6	4F2 cell-surface antigen heavy chain OS=Homo sapiens GN=SLC3A2 PE=1 SV=1 - [F5GZS6_HUMAN]	33.89	18	18	89	599	64.8322	5.09717	1.0025	30	11.6352	0.96416	24	9.6172	0.828576	35	15.3445	0.982341	30	14.9333	0.945532	24	9.31676	1.13551	35	8.79098	1.01862	30	12.1283	1.10103	24	12.0218	0.869893	35	14.4331	0.976984	30	13.5975	1.01102	24	8.98359	1.11315	35	10.5918
P50995	Annexin A11 OS=Homo sapiens GN=ANXA11 PE=1 SV=1 - [ANX11_HUMAN]	33.86	1	15	85	505	54.3551	7.6499	1.18709	2	5.70903	1.09809	3	0.989328	0.970194	3	6.83434	0.804353	2	3.12755	0.959335	3	5.52247	1.02465	3	1.50474	1.029	2	4.71088	0.946476	3	2.89104	1.00892	3	4.77105	0.880868	2	0.757227	0.981182	3	2.8367	1.09667	3	8.81193
I3L172	Protein MCRIP2 OS=Homo sapiens GN=MCRIP2 PE=1 SV=1 - [I3L172_HUMAN]	33.85	2	2	5	65	7.02772	10.9458	1.01057	3	6.14873	1.08502	1		1.14036	1		0.97009	3	9.71392	0.857183	1		0.734472	1		0.989885	3	13.1214	1.13457	1		1.35448	1		1.04273	3	16.0291	0.914973	1		0.842382	1
Q96DI9	POLDIP3 protein (Fragment) OS=Homo sapiens GN=POLDIP3 PE=2 SV=2 - [Q96DI9_HUMAN]	33.81	11	11	30	417	45.6303	10.0376	1.03226	10	2.23945	1.00696	11	4.35552	1.01528	9	4.90008	0.982976	10	9.39901	0.962398	11	3.05754	1.0265	9	4.4043	1.03183	10	2.42558	0.990401	11	5.90534	0.951988	9	14.7797	0.944091	10	3.35105	1.03674	11	6.13571	1.01483	9	6.62601
A0A024R7F1	Protein kinase C substrate 80K-H, isoform CRA_a OS=Homo sapiens GN=PRKCSH PE=4 SV=1 - [A0A024R7F1_HUMAN]	33.78	17	17	111	527	59.2588	4.41162	1.03783	32	8.91804	0.990852	39	13.769	0.902445	40	13.1127	0.996749	32	10.2555	0.98291	39	11.975	1.03113	40	10.4057	1.01184	32	4.26099	0.977623	39	8.24194	0.975917	40	12.5243	0.964388	32	7.99655	1.0159	39	7.46927	1.03843	40	8.85994
O43837	Isocitrate dehydrogenase [NAD] subunit beta, mitochondrial OS=Homo sapiens GN=IDH3B PE=1 SV=2 - [IDH3B_HUMAN]	33.77	12	12	33	385	42.1566	8.45557	1.05978	12	10.0886	0.972257	10	4.71071	1.00811	11	15.313	0.991587	12	11.11	1.01274	10	5.94525	1.10132	11	7.42313	0.987802	12	5.77991	0.957997	10	3.90215	0.924972	11	8.50304	0.94424	12	10.598	1.02321	10	3.14408	0.995506	11	9.25942
H3BLU7	Aflatoxin B1 aldehyde reductase member 2 (Fragment) OS=Homo sapiens GN=AKR7A2 PE=1 SV=1 - [H3BLU7_HUMAN]	33.76	9	9	34	314	34.6622	7.18115	0.930326	13	6.67185	1.02124	11	4.51494	1.02847	10	5.12469	1.14479	13	7.09078	1.04902	11	8.75163	1.04086	10	8.02276	0.980125	13	5.87626	1.00588	11	8.0227	0.796285	10	45.1446	1.00717	13	5.67693	0.943387	11	2.5098	1.09758	10	24.3645
O75643	U5 small nuclear ribonucleoprotein 200 kDa helicase OS=Homo sapiens GN=SNRNP200 PE=1 SV=2 - [U520_HUMAN]	33.75	66	66	252	2136	244.353	6.06201	1.03646	117	7.72878	1.0171	72	6.31413	1.05494	63	8.96147	0.927881	117	14.5199	0.981588	72	6.74171	0.964508	63	6.4613	1.0537	117	11.3179	1.01002	72	6.58615	1.06017	63	15.1847	0.963251	117	16.7721	0.989144	72	7.79387	0.963945	63	12.1196
B2R6D4	Phosphomannomutase OS=Homo sapiens PE=2 SV=1 - [B2R6D4_HUMAN]	33.74	8	9	28	246	28.0362	6.771	1.04042	9	5.57752	0.970448	7	2.83663	0.885176	9	19.5086	0.912634	9	7.35218	1.03722	7	3.42851	1.10856	9	12.2454	1.04055	9	4.87586	0.996393	7	7.01142	0.971056	9	11.4665	0.964843	9	5.1662	1.00665	7	4.39939	1.05788	9	0.544586
P42167	Lamina-associated polypeptide 2, isoforms beta/gamma OS=Homo sapiens GN=TMPO PE=1 SV=2 - [LAP2B_HUMAN]	33.7	5	12	75	454	50.6395	9.37842	1.02367	10	7.80486	0.994839	6	2.9363	0.918796	7	4.66658	0.992849	10	9.09733	1.04391	6	5.56638	0.963486	7	12.9678	1.06268	10	6.4998	0.936849	6	5.16019	0.891665	7	3.15275	0.984957	10	10.4744	1.01823	6	8.87793	1.2363	7	3.87571
Q15046	Lysine--tRNA ligase OS=Homo sapiens GN=KARS PE=1 SV=3 - [SYK_HUMAN]	33.67	20	20	106	597	68.0046	6.354	1.02101	45	8.03308	0.940804	31	9.59106	0.948139	30	5.11925	0.962104	45	13.0571	1.05666	31	5.61058	1.02994	30	8.81464	1.03405	45	8.14075	0.969429	31	6.3496	0.993775	30	9.32097	0.984726	45	11.3794	1.04607	31	4.61741	0.993699	30	8.73218
P04792	Heat shock protein beta-1 OS=Homo sapiens GN=HSPB1 PE=1 SV=2 - [HSPB1_HUMAN]	33.66	6	6	28	205	22.7685	6.40479	0.846461	7	6.22841	1.05967	12	7.0887	1.5228	9	6.11734	1.36664	7	22.5134	1.02432	12	5.3948	0.631787	9	13.6132	0.812229	7	5.98472	0.935162	12	10.2456	1.28661	9	14.3421	1.20918	7	11.5011	0.952492	12	6.56646	0.70613	9	27.7734
A0A024R755	Calumenin, isoform CRA_a OS=Homo sapiens GN=CALU PE=4 SV=1 - [A0A024R755_HUMAN]	33.65	1	9	28	315	37.1114	4.58936				1.04999	1		0.968094	1					0.93576	1		0.994782	1					1.06785	1		1.03169	1					0.943809	1		1.00442	1
Q13501	Sequestosome-1 OS=Homo sapiens GN=SQSTM1 PE=1 SV=1 - [SQSTM_HUMAN]	33.64	9	9	33	440	47.6569	5.22412	0.92332	11	6.22189	0.921367	10	11.1114	0.942153	12	18.2815	1.01461	11	7.32438	0.916073	10	7.22196	0.856278	12	10.4569	1.01424	11	8.01842	1.11152	10	12.9398	1.12756	12	12.9239	1.09933	11	9.2964	1.08059	10	4.85932	1.09325	12	9.64804
P50416	Carnitine O-palmitoyltransferase 1, liver isoform OS=Homo sapiens GN=CPT1A PE=1 SV=2 - [CPT1A_HUMAN]	33.64	23	23	96	773	88.3107	8.646	0.968066	29	7.11965	0.96345	37	9.2015	1.09283	30	7.5676	1.02309	29	7.97185	0.996901	37	10.5022	0.913883	30	7.24744	0.961094	29	4.668	0.994693	37	8.59603	1.15956	30	17.6309	1.09422	29	8.03802	1.02437	37	9.02049	0.881554	30	16.5764
P22570	NADPH:adrenodoxin oxidoreductase, mitochondrial OS=Homo sapiens GN=FDXR PE=1 SV=3 - [ADRO_HUMAN]	33.6	15	15	46	491	53.803	8.44092	1.04717	15	4.88229	1.02758	14	4.92265	0.941297	17	9.40301	1.04356	15	8.03035	1.07315	14	5.09282	1.04992	17	2.94439	0.979861	15	6.11849	0.939772	14	7.69419	0.980028	17	12.4338	0.953362	15	11.0514	0.988912	14	8.12567	1.00334	17	5.92955
P29762	Cellular retinoic acid-binding protein 1 OS=Homo sapiens GN=CRABP1 PE=1 SV=2 - [RABP1_HUMAN]	33.58	4	4	11	137	15.5557	5.37646	1.00226	2	7.40873	0.962038	4	4.32346	1.02146	5	16.3143	0.959778	2	18.216	1.10703	4	3.24261	0.904403	5	5.45277	1.03022	2	12.8787	0.981232	4	1.09421	1.15807	5	11.8429	0.9894	2	13.8047	0.972313	4	10.1001	0.848023	5	5.89948
O43175	D-3-phosphoglycerate dehydrogenase OS=Homo sapiens GN=PHGDH PE=1 SV=4 - [SERA_HUMAN]	33.58	15	15	107	533	56.6144	6.7124	1.03576	38	6.62975	1.02827	33	7.62631	0.867771	36	11.5114	0.958657	38	10.9637	1.00453	33	7.70492	1.15843	36	9.88222	1.03979	38	10.0483	1.0144	33	8.62057	0.848865	36	24.2184	0.913715	38	11.9917	0.966236	33	9.28076	1.14283	36	19.3774
Q08945	FACT complex subunit SSRP1 OS=Homo sapiens GN=SSRP1 PE=1 SV=1 - [SSRP1_HUMAN]	33.57	21	21	82	709	81.0244	6.87354	1.01036	36	10.6465	0.988936	22	8.76584	0.95837	24	7.90946	1.00864	36	10.0262	1.09561	22	7.31058	1.08131	24	8.05609	1.05609	36	9.76003	0.985874	22	6.56279	0.857764	24	18.2271	0.900919	36	8.90758	0.946028	22	5.13897	1.04074	24	8.17832
Q9BQ61	Uncharacterized protein C19orf43 OS=Homo sapiens GN=C19orf43 PE=1 SV=1 - [CS043_HUMAN]	33.52	4	4	25	176	18.4082	9.43701	0.969373	8	12.0904	1.00687	8	11.7205	0.979478	9	10.7279	1.03485	8	13.785	1.07321	8	5.77738	0.989463	9	2.88492	0.942448	8	9.84087	0.964773	8	5.02262	1.06742	9	7.77184	1.14082	8	19.6822	0.915336	8	10.2715	0.949665	9	5.83005
B2RA56	Nicalin OS=Homo sapiens PE=2 SV=1 - [B2RA56_HUMAN]	33.51	16	16	48	552	61.72	7.48877	0.989424	19	6.30152	1.01969	15	6.7045	1.01672	14	5.24178	1.01435	19	10.7667	1.00526	15	8.52176	1.02562	14	9.56781	0.968067	19	6.55545	0.957054	15	7.68228	0.995301	14	17.6004	1.02451	19	8.55025	1.00566	15	8.09927	0.976401	14	8.5837
Q9BY32	Inosine triphosphate pyrophosphatase OS=Homo sapiens GN=ITPA PE=1 SV=2 - [ITPA_HUMAN]	33.51	4	4	7	194	21.4319	5.65576	0.939934	3	14.0887	1.12325	1		1.03919	3	3.88676	1.16695	3	14.0192	0.958105	1		1.01503	3	7.8021	1.00421	3	2.54149	1.00166	1		0.829518	3	31.5139	0.969972	3	3.79743	0.907499	1		1.10394	3	4.98279
Q5JR08	Rho-related GTP-binding protein RhoC (Fragment) OS=Homo sapiens GN=RHOC PE=1 SV=8 - [Q5JR08_HUMAN]	33.51	1	6	45	188	21.509	6.58057	0.965704	2	2.63022	0.815039	2	16.6118	0.928183	3	6.76912	1.07789	2	0.466514	1.18007	2	9.51702	1.02197	3	3.18643	1.00698	2	5.213	1.01213	2	8.99411	0.9861	3	7.95064	0.984326	2	3.33395	1.01325	2	4.64155	1.02494	3	1.44294
P46087	Probable 28S rRNA (cytosine(4447)-C(5))-methyltransferase OS=Homo sapiens GN=NOP2 PE=1 SV=2 - [NOP2_HUMAN]	33.5	21	24	84	812	89.2471	9.23193	1.05276	27	3.58258	0.996872	23	8.81348	0.913616	27	10.4243	0.908654	27	7.95097	1.03778	23	7.09436	1.09172	27	8.81084	1.08538	27	6.42029	0.992544	23	4.24707	0.91614	27	11.0276	0.913446	27	9.33672	0.984655	23	3.7803	1.09489	27	7.05174
P50914	60S ribosomal protein L14 OS=Homo sapiens GN=RPL14 PE=1 SV=4 - [RL14_HUMAN]	33.49	7	7	72	215	23.417	10.9312	1.10701	19	7.20577	1.07847	26	7.83327	1.04728	27	16.6501	0.829537	19	16.7241	0.878233	26	9.42878	1.02071	27	9.45438	1.15282	19	13.1764	1.08937	26	6.19883	0.947249	27	10.5736	0.805445	19	20.2229	0.916064	26	10.375	0.958692	27	8.34376
Q9H444	Charged multivesicular body protein 4b OS=Homo sapiens GN=CHMP4B PE=1 SV=1 - [CHM4B_HUMAN]	33.48	6	7	29	224	24.9346	4.81787	0.909161	8	3.41648	0.985065	8	6.19289	0.993033	10	11.5623	1.00939	8	5.32564	1.05254	8	4.22913	0.935704	10	3.49983	1.08288	8	3.61951	0.992364	8	5.64015	1.13959	10	8.15893	1.0263	8	3.47192	0.963196	8	8.23922	0.950346	10	9.70449
Q13151	Heterogeneous nuclear ribonucleoprotein A0 OS=Homo sapiens GN=HNRNPA0 PE=1 SV=1 - [ROA0_HUMAN]	33.44	7	9	95	305	30.8218	9.29053	0.984308	16	9.27522	1.03342	9	13.1343	0.906135	11	5.49259	1.00876	16	13.9468	1.00678	9	11.9977	1.0726	11	11.0823	1.00498	16	8.74202	1.04263	9	10.3584	0.663524	11	35.3926	0.954555	16	19.8576	0.880659	9	16.7123	1.20702	11	16.4464
Q96GK7	Fumarylacetoacetate hydrolase domain-containing protein 2A OS=Homo sapiens GN=FAHD2A PE=1 SV=1 - [FAH2A_HUMAN]	33.44	8	8	28	314	34.5741	8.23584	0.950701	8	3.52883	0.983724	9	8.34962	0.971377	10	7.2669	1.05133	8	8.27043	1.0387	9	5.54098	1.00097	10	8.57703	0.960722	8	3.98464	0.978228	9	6.15014	0.95824	10	11.3084	1.0184	8	3.62037	1.00147	9	5.21177	1.02834	10	3.91267
P31943	Heterogeneous nuclear ribonucleoprotein H OS=Homo sapiens GN=HNRNPH1 PE=1 SV=4 - [HNRH1_HUMAN]	33.41	4	11	132	449	49.1984	6.30322	1.04481	5	3.3828	0.874562	4	5.11083	0.924534	8	7.37988	0.92693	5	4.99384	1.1322	4	1.16353	1.07707	8	6.15628	1.03176	5	5.12273	0.967295	4	4.23703	1.00243	8	11.1609	1.00388	5	11.4905	1.03448	4	3.03018	0.99927	8	4.33628
M0QWZ7	Serine--tRNA ligase, mitochondrial OS=Homo sapiens GN=SARS2 PE=1 SV=1 - [M0QWZ7_HUMAN]	33.4	12	12	37	518	58.1458	8.27979	0.976215	14	10.2539	1.00268	10	5.76059	0.924887	13	5.08519	1.01128	14	13.2956	0.953343	10	2.56134	1.04385	13	12.324	1.00298	14	9.4069	0.998012	10	4.4026	0.897008	13	39.8859	0.916611	14	11.2914	1.0459	10	4.55476	1.03648	13	18.8689
O75533	Splicing factor 3B subunit 1 OS=Homo sapiens GN=SF3B1 PE=1 SV=3 - [SF3B1_HUMAN]	33.36	35	35	114	1304	145.738	7.09326	0.994548	46	8.1438	0.988199	34	6.27199	0.937465	34	9.09743	1.00485	46	13.0317	1.0177	34	7.01809	1.03276	34	7.23578	1.0194	46	6.22461	1.00606	34	10.0138	0.972497	34	12.1659	1.00631	46	14.8218	1.01038	34	8.16872	1.01768	34	11.3783
A0A024R4E5	High density lipoprotein binding protein (Vigilin), isoform CRA_a OS=Homo sapiens GN=HDLBP PE=1 SV=1 - [A0A024R4E5_HUMAN]	33.36	38	38	121	1268	141.352	6.87354	1.00518	46	8.02771	1.03347	40	7.27901	1.11454	33	10.6938	0.955034	46	11.2706	0.912437	40	9.29098	0.881554	33	6.64122	1.00465	46	8.49693	1.07202	40	8.45931	1.10474	33	19.2435	1.03636	46	13.0899	0.987659	40	6.51625	0.944611	33	14.6332
A6NF51	3'(2'),5'-bisphosphate nucleotidase 1 OS=Homo sapiens GN=BPNT1 PE=1 SV=2 - [A6NF51_HUMAN]	33.33	8	8	19	291	31.6873	5.5415	0.890808	7	10.7261	0.886365	3	1.39211	0.987218	9	8.18169	1.16985	7	7.64563	1.00463	3	8.98567	1.02683	9	6.81877	0.860826	7	8.13701	1.10342	3	3.38429	0.993906	9	10.3803	1.13133	7	20.3749	1.03112	3	5.56362	1.03055	9	6.4203
Q9BR63	FARSB protein (Fragment) OS=Homo sapiens GN=FARSB PE=2 SV=2 - [Q9BR63_HUMAN]	33.33	19	19	59	585	65.6594	6.84424	1.0629	27	8.5141	0.966536	15	5.04521	0.902178	17	16.5493	0.888803	27	11.8649	1.00117	15	8.4747	1.08467	17	8.78933	1.0905	27	6.61876	0.968754	15	4.45311	0.948043	17	15.8781	0.87608	27	13.0638	1.02445	15	6.73809	1.01048	17	4.96844
Q8TC12	Retinol dehydrogenase 11 OS=Homo sapiens GN=RDH11 PE=1 SV=2 - [RDH11_HUMAN]	33.33	8	8	37	318	35.3634	8.82178	0.940544	13	9.84947	1.03877	12	4.57739	0.979672	12	8.2815	1.10917	13	7.69201	0.986846	12	3.60318	0.966838	12	16.6123	0.922963	13	7.46327	0.973259	12	7.00725	0.991675	12	12.6073	1.09671	13	6.25859	1.00555	12	4.77661	1.09413	12	13.3878
Q07812	Apoptosis regulator BAX OS=Homo sapiens GN=BAX PE=1 SV=1 - [BAX_HUMAN]	33.33	5	5	13	192	21.1708	5.22412	0.978927	4	7.27293	0.958361	6	4.70551	0.948857	3	7.3757	1.00446	4	5.87714	1.19355	6	4.98231	0.974738	3	1.84339	0.993874	4	3.16797	0.910764	6	1.61651	1.08805	3	2.73081	0.98856	4	10.1212	0.983494	6	4.03731	0.939563	3	12.4858
Q53H82	Endoribonuclease LACTB2 OS=Homo sapiens GN=LACTB2 PE=1 SV=2 - [LACB2_HUMAN]	33.33	8	8	17	288	32.7849	6.80029	1.06552	7	5.27395	0.966638	4	5.20853	0.915753	6	10.1359	0.875109	7	4.25975	1.02416	4	2.26213	1.08751	6	5.88824	1.05657	7	4.02977	1.01163	4	2.17095	0.877032	6	15.936	0.932141	7	5.22995	1.02086	4	6.00573	1.06815	6	6.92639
P82933	28S ribosomal protein S9, mitochondrial OS=Homo sapiens GN=MRPS9 PE=1 SV=2 - [RT09_HUMAN]	33.33	11	11	36	396	45.8058	9.51025	1.02032	12	7.13202	1.00631	14	6.41576	0.999233	10	4.73407	1.02804	12	11.4513	1.02929	14	11.8319	1.03879	10	11.6359	1.04405	12	8.7692	1.00543	14	10.1649	0.898741	10	34.3256	0.969534	12	15.5451	1.00776	14	8.33578	1.08584	10	15.045
E5RFF9	DNA replication complex GINS protein SLD5 OS=Homo sapiens GN=GINS4 PE=1 SV=1 - [E5RFF9_HUMAN]	33.33	5	5	12	192	22.6384	4.89404	1.07507	6	5.172	1.00057	3	1.21504	1.05489	3	7.48972	0.991947	6	19.2321	1.04062	3	6.74022	1.03672	3	2.79625	0.990722	6	9.63765	1.02064	3	0.641071	0.849647	3	4.43625	0.942724	6	12.0675	1.00321	3	4.47485	1.06452	3	7.44709
O75822	Eukaryotic translation initiation factor 3 subunit J OS=Homo sapiens GN=EIF3J PE=1 SV=2 - [EIF3J_HUMAN]	33.33	9	9	32	258	29.0445	4.83057	1.00055	13	7.87205	1.00638	12	8.56886	0.919462	7	7.27449	0.947184	13	7.68276	1.04327	12	8.49376	1.0354	7	8.6053	1.05649	13	5.70565	0.976838	12	8.23953	1.05682	7	7.25729	0.99162	13	7.17423	0.994214	12	4.01256	0.997922	7	4.60602
Q9UD71	Protein phosphatase 1 regulatory subunit 1B OS=Homo sapiens GN=PPP1R1B PE=1 SV=2 - [PPR1B_HUMAN]	33.33	5	5	23	204	22.9489	4.52588	0.995744	7	3.00801	1.0767	8	2.70688	1.08673	8	11.4433	1.07811	7	12.4928	0.972262	8	4.85989	1.00573	8	14.5503	0.910508	7	12.9351	1.00332	8	3.16302	0.973087	8	8.70112	1.03313	7	4.0132	0.953454	8	6.6898	0.972217	8	8.36146
Q9BPX5	Actin-related protein 2/3 complex subunit 5-like protein OS=Homo sapiens GN=ARPC5L PE=1 SV=1 - [ARP5L_HUMAN]	33.33	4	4	9	153	16.9308	6.59521	1.03176	4	1.7103	1.05237	3	0.300766	1.05273	2	3.75909	0.965902	4	8.29602	1.04293	3	13.1015	1.0761	2	15.7128	1.02195	4	4.40715	0.950223	3	17.728	0.734635	2	73.9838	0.967728	4	3.77078	0.965126	3	1.4612	1.03154	2	27.5949
Q8WW01	tRNA-splicing endonuclease subunit Sen15 OS=Homo sapiens GN=TSEN15 PE=1 SV=1 - [SEN15_HUMAN]	33.33	3	3	5	171	18.6292	4.57666	0.984701	2	18.5336	0.983955	2	18.3043	0.939334	1		0.800898	2	5.67575	0.999317	2	2.40969	1.07539	1		1.03068	2	7.58895	1.05253	2	9.88479	0.987378	1		1.14164	2	29.4801	0.95702	2	12.1672	0.97083	1
A0A0S2Z3K9	V-crk sarcoma virus CT10 oncogene-like protein isoform 2 OS=Homo sapiens GN=CRK PE=2 SV=1 - [A0A0S2Z3K9_HUMAN]	33.33	1	5	24	204	22.8915	5.47803				1.06256	1		1.06152	1					1.03184	1		0.996782	1					0.905534	1		0.961233	1					0.997115	1		0.990223	1
B3KY60	cDNA FLJ16777 fis, clone BRHIP2029567, highly similar to Cell division cycle 5-like protein OS=Homo sapiens PE=2 SV=1 - [B3KY60_HUMAN]	33.29	21	21	58	802	92.2197	8.17725	1.00654	28	8.89858	1.00567	12	4.49194	0.996546	17	3.31417	1.04511	28	5.07584	1.03639	12	4.94473	1.04087	17	8.70357	1.00064	28	6.30517	0.993954	12	5.57775	0.965319	17	17.706	0.983901	28	15.2732	0.967252	12	2.11091	1.01845	17	12.8546
P21281	V-type proton ATPase subunit B, brain isoform OS=Homo sapiens GN=ATP6V1B2 PE=1 SV=3 - [VATB2_HUMAN]	33.27	15	15	55	511	56.4649	5.80811	1.03579	16	6.66785	0.984931	17	6.90447	0.916668	21	8.18804	0.991285	16	6.18356	1.02209	17	6.55023	1.05492	21	6.89547	0.982026	16	6.85327	0.980927	17	5.93464	0.962644	21	18.2794	1.00206	16	6.67354	1.02622	17	4.16592	1.0437	21	13.1344
Q15738	Sterol-4-alpha-carboxylate 3-dehydrogenase, decarboxylating OS=Homo sapiens GN=NSDHL PE=1 SV=2 - [NSDHL_HUMAN]	33.24	11	11	51	373	41.8736	8.06006	0.981282	20	8.94585	0.997122	16	7.83232	1.08724	15	8.91827	1.03772	20	7.8553	1.02108	16	3.61151	0.927871	15	9.68989	0.969913	20	7.25094	0.998613	16	3.84504	1.05673	15	21.7214	1.07621	20	10.7075	0.975243	16	10.6111	0.950713	15	15.125
B4DM97	cDNA FLJ55002, highly similar to Alpha-centractin OS=Homo sapiens PE=2 SV=1 - [B4DM97_HUMAN]	33.23	7	10	34	334	38.2507	6.96143	0.974623	6	8.83687	1.03579	9	17.1042	0.946524	8	8.96638	1.12793	6	34.0944	0.95832	9	6.81289	1.03243	8	4.81321	0.9925	6	8.97611	1.03039	9	9.20586	0.96806	8	19.8456	0.948399	6	4.03764	0.958792	9	11.4303	1.02901	8	13.2665
[truncated: 5,054 more rows]
